# Supplementary material for: Machine learning-assisted discovery of growth decision elements by relating bacterial population dynamics to environmental diversity
Source: eLife. 2022 Aug 26;11:e76846. doi: 10.7554/eLife.76846 (PMC9417415; doi:10.7554/eLife.76846)
Supplement: Figure 2—source data 1. [file elife-76846-fig2-data1.xlsx]

## Sheet: Table S2
Medium combinations used in the growth assay. The logarithmic concentrations are shown, in which the concentration of zero was replaced with the logarithmic value of one hundredth of its minimal concentration used to prepare the medium combinations.
log10[Glucose] (mM)	log10[Citrate] (mM)	log10[Ammonium] (mM)	log10[Phosphate] (mM)	log10[Sulfate] (mM)	log10[Thiosulfate] (mM)	log10[Cl] (mM)	log10[Ala] (mM)	log10[Arg] (mM)	log10[Asn] (mM)	log10[Asp] (mM)	log10[Cys] (mM)	log10[Glu] (mM)	log10[Gln] (mM)	log10[Gly] (mM)	log10[His] (mM)	log10[Ile] (mM)	log10[Leu] (mM)	log10[Lys] (mM)	log10[Met] (mM)	log10[Phe] (mM)	log10[Pro] (mM)	log10[Ser] (mM)	log10[Thr] (mM)	log10[Trp] (mM)	log10[Tyr] (mM)	log10[Val] (mM)	log10[K] (mM)	log10[Na] (mM)	log10[Mg] (mM)	log10[Ca] (mM)	log10[Fe] (mM)	log10[Cu] (mM)	log10[Zn] (mM)	log10[Molybdate] (mM)	log10[VB1] (mM)	log10[VB2] (mM)	log10[VB6] (mM)	log10[VB9] (mM)	log10[Borate] (mM)	log10[PABA] (mM)	τ_ave	τ_sd	r_ave	r_sd	K_ave	K_sd
0.30103	-1.69897	0.477121	1.80863	0.043602	-0.30103	0.209783	-1.69897	-1.69897	-1.69897	-1.69897	-1.69897	-1.69897	-1.69897	-1.69897	-1.69897	-1.69897	-1.69897	-1.69897	-1.69897	-1.69897	-1.69897	-1.69897	-1.69897	-1.69897	-2	-1.69897	1.34875	1.93329	-0.69897	-1.82391	-3.30103	-5	-4	-3	-3	-3.30103	-2.69897	-4.30103	-2.09691	-3	0	0	0	0	0	0
0.30103	-1.69897	0.477121	1.97795	0.043602	-0.30103	0.209783	-1.69897	-1.69897	-1.69897	-1.69897	-1.69897	-1.69897	-1.69897	-1.69897	-1.69897	-1.69897	-1.69897	-1.69897	-1.69897	-1.69897	-1.69897	-1.69897	-1.69897	-1.69897	-2	-1.69897	1.92273	1.93329	-0.69897	-1.82391	-3.30103	-5	-4	-3	-3	-3.30103	-2.69897	-4.30103	-2.09691	-3	4.83333	0.372678	1.35196	0.121887	0.246239	0.00635881
0.30103	-1.69897	0.477121	2.09968	0.043602	-0.30103	0.209783	-1.69897	-1.69897	-1.69897	-1.69897	-1.69897	-1.69897	-1.69897	-1.69897	-1.69897	-1.69897	-1.69897	-1.69897	-1.69897	-1.69897	-1.69897	-1.69897	-1.69897	-1.69897	-2	-1.69897	2.16197	1.93329	-0.69897	-1.82391	-3.30103	-5	-4	-3	-3	-3.30103	-2.69897	-4.30103	-2.09691	-3	5.147	0.392367	1.21248	0.117929	0.260851	0.00824997
0.30103	-1.69897	0.477121	2.19465	0.043602	-0.30103	0.209783	-1.69897	-1.69897	-1.69897	-1.69897	-1.69897	-1.69897	-1.69897	-1.69897	-1.69897	-1.69897	-1.69897	-1.69897	-1.69897	-1.69897	-1.69897	-1.69897	-1.69897	-1.69897	-2	-1.69897	2.31534	1.93329	-0.69897	-1.82391	-3.30103	-5	-4	-3	-3	-3.30103	-2.69897	-4.30103	-2.09691	-3	5.33333	0.311805	1.31664	0.0482781	0.278489	0.0271579
0.30103	-1.69897	0.477121	2.27254	0.043602	-0.30103	0.209783	-1.69897	-1.69897	-1.69897	-1.69897	-1.69897	-1.69897	-1.69897	-1.69897	-1.69897	-1.69897	-1.69897	-1.69897	-1.69897	-1.69897	-1.69897	-1.69897	-1.69897	-1.69897	-2	-1.69897	2.42846	1.93329	-0.69897	-1.82391	-3.30103	-5	-4	-3	-3	-3.30103	-2.69897	-4.30103	-2.09691	-3	5.79167	0.246503	1.20614	0.0621511	0.269267	0.0270666
0.30103	-1.69897	0.477121	2.01636	0.043602	-0.30103	0.209783	-1.69897	-1.69897	-1.69897	-1.69897	-1.69897	-1.69897	-1.69897	-1.69897	-1.69897	-1.69897	-1.69897	-1.69897	-1.69897	-1.69897	-1.69897	-1.69897	-1.69897	-1.69897	-2	-1.69897	2.09075	1.93329	-0.69897	-1.82391	-3.30103	-5	-4	-3	-3	-3.30103	-2.69897	-4.30103	-2.09691	-3	5.27778	0.299176	1.20966	0.165079	0.258121	0.00695169
0.30103	-1.69897	0.477121	2.05994	0.043602	-0.30103	0.209783	-1.69897	-1.69897	-1.69897	-1.69897	-1.69897	-1.69897	-1.69897	-1.69897	-1.69897	-1.69897	-1.69897	-1.69897	-1.69897	-1.69897	-1.69897	-1.69897	-1.69897	-1.69897	-2	-1.69897	2.12775	1.93329	-0.69897	-1.82391	-3.30103	-5	-4	-3	-3	-3.30103	-2.69897	-4.30103	-2.09691	-3	5.42101	0.345245	1.18666	0.120283	0.262899	0.0190967
0.30103	-1.69897	0.477121	2.1532	0.043602	-0.30103	0.209783	-1.69897	-1.69897	-1.69897	-1.69897	-1.69897	-1.69897	-1.69897	-1.69897	-1.69897	-1.69897	-1.69897	-1.69897	-1.69897	-1.69897	-1.69897	-1.69897	-1.69897	-1.69897	-2	-1.69897	2.20871	1.93329	-0.69897	-1.82391	-3.30103	-5	-4	-3	-3	-3.30103	-2.69897	-4.30103	-2.09691	-3	5.27778	0.38087	1.263	0.101028	0.264621	0.0112645
0.30103	-1.69897	0.477121	2.2572	0.043602	-0.30103	0.209783	-1.69897	-1.69897	-1.69897	-1.69897	-1.69897	-1.69897	-1.69897	-1.69897	-1.69897	-1.69897	-1.69897	-1.69897	-1.69897	-1.69897	-1.69897	-1.69897	-1.69897	-1.69897	-2	-1.69897	2.30146	1.93329	-0.69897	-1.82391	-3.30103	-5	-4	-3	-3	-3.30103	-2.69897	-4.30103	-2.09691	-3	5.5	0.372678	1.30252	0.115784	0.262551	0.0130509
0.30103	-1.69897	0.477121	1.92169	0.043602	-0.30103	0.209783	-1.69897	-1.69897	-1.69897	-1.69897	-1.69897	-1.69897	-1.69897	-1.69897	-1.69897	-1.69897	-1.69897	-1.69897	-1.69897	-1.69897	-1.69897	-1.69897	-1.69897	-1.69897	-2	-1.69897	2.16197	0.0652061	-0.69897	-1.82391	-3.30103	-5	-4	-3	-3	-3.30103	-2.69897	-4.30103	-2.09691	-3	5.20833	0.246503	1.16141	0.0953771	0.250267	0.00997079
0.30103	-1.69897	0.477121	2.01974	0.043602	-0.30103	0.209783	-1.69897	-1.69897	-1.69897	-1.69897	-1.69897	-1.69897	-1.69897	-1.69897	-1.69897	-1.69897	-1.69897	-1.69897	-1.69897	-1.69897	-1.69897	-1.69897	-1.69897	-1.69897	-2	-1.69897	2.16197	1.63811	-0.69897	-1.82391	-3.30103	-5	-4	-3	-3	-3.30103	-2.69897	-4.30103	-2.09691	-3	4.33333	0.372678	1.29122	0.142532	0.256373	0.00776787
0.30103	-1.69897	0.477121	2.16717	0.043602	-0.30103	0.209783	-1.69897	-1.69897	-1.69897	-1.69897	-1.69897	-1.69897	-1.69897	-1.69897	-1.69897	-1.69897	-1.69897	-1.69897	-1.69897	-1.69897	-1.69897	-1.69897	-1.69897	-1.69897	-2	-1.69897	2.16197	2.10742	-0.69897	-1.82391	-3.30103	-5	-4	-3	-3	-3.30103	-2.69897	-4.30103	-2.09691	-3	4.16667	0.235702	1.19038	0.0623445	0.256572	0.00260149
0.30103	-1.69897	0.477121	2.22557	0.043602	-0.30103	0.209783	-1.69897	-1.69897	-1.69897	-1.69897	-1.69897	-1.69897	-1.69897	-1.69897	-1.69897	-1.69897	-1.69897	-1.69897	-1.69897	-1.69897	-1.69897	-1.69897	-1.69897	-1.69897	-2	-1.69897	2.16197	2.23137	-0.69897	-1.82391	-3.30103	-5	-4	-3	-3	-3.30103	-2.69897	-4.30103	-2.09691	-3	4.41667	0.276385	1.13983	0.0439063	0.2581	0.00693112
-1.69897	-1.69897	0.477121	2.09968	0.043602	-0.30103	0.209783	-1.69897	-1.69897	-1.69897	-1.69897	-1.69897	-1.69897	-1.69897	-1.69897	-1.69897	-1.69897	-1.69897	-1.69897	-1.69897	-1.69897	-1.69897	-1.69897	-1.69897	-1.69897	-2	-1.69897	2.16197	1.93329	-0.69897	-1.82391	-3.30103	-5	-4	-3	-3	-3.30103	-2.69897	-4.30103	-2.09691	-3	6.25	0.433013	0.936871	0.108321	0.0843121	0.000714535
-0.657577	-1.69897	0.477121	2.09968	0.043602	-0.30103	0.209783	-1.69897	-1.69897	-1.69897	-1.69897	-1.69897	-1.69897	-1.69897	-1.69897	-1.69897	-1.69897	-1.69897	-1.69897	-1.69897	-1.69897	-1.69897	-1.69897	-1.69897	-1.69897	-2	-1.69897	2.16197	1.93329	-0.69897	-1.82391	-3.30103	-5	-4	-3	-3	-3.30103	-2.69897	-4.30103	-2.09691	-3	4.16667	0.235702	1.26857	0.193825	0.101767	0.00100504
1.30103	-1.69897	0.477121	2.09968	0.043602	-0.30103	0.209783	-1.69897	-1.69897	-1.69897	-1.69897	-1.69897	-1.69897	-1.69897	-1.69897	-1.69897	-1.69897	-1.69897	-1.69897	-1.69897	-1.69897	-1.69897	-1.69897	-1.69897	-1.69897	-2	-1.69897	2.16197	1.93329	-0.69897	-1.82391	-3.30103	-5	-4	-3	-3	-3.30103	-2.69897	-4.30103	-2.09691	-3	4.20833	0.320048	1.05724	0.105338
2.30103	-1.69897	0.477121	2.09968	0.043602	-0.30103	0.209783	-1.69897	-1.69897	-1.69897	-1.69897	-1.69897	-1.69897	-1.69897	-1.69897	-1.69897	-1.69897	-1.69897	-1.69897	-1.69897	-1.69897	-1.69897	-1.69897	-1.69897	-1.69897	-2	-1.69897	2.16197	1.93329	-0.69897	-1.82391	-3.30103	-5	-4	-3	-3	-3.30103	-2.69897	-4.30103	-2.09691	-3	4.58333	0.276385	0.944983	0.180566
0.30103	-1.69897	0.0128372	2.09968	-0.918617	-0.30103	0.209783	-1.69897	-1.69897	-1.69897	-1.69897	-1.69897	-1.69897	-1.69897	-1.69897	-1.69897	-1.69897	-1.69897	-1.69897	-1.69897	-1.69897	-1.69897	-1.69897	-1.69897	-1.69897	-2	-1.69897	2.16197	1.93329	-0.69897	-1.82391	-3.30103	-5	-4	-3	-3	-3.30103	-2.69897	-4.30103	-2.09691	-3	5.5	0.353553	1.16753	0.0926393	0.210767	0
0.30103	-1.69897	0.0899051	2.09968	-0.656375	-0.30103	0.209783	-1.69897	-1.69897	-1.69897	-1.69897	-1.69897	-1.69897	-1.69897	-1.69897	-1.69897	-1.69897	-1.69897	-1.69897	-1.69897	-1.69897	-1.69897	-1.69897	-1.69897	-1.69897	-2	-1.69897	2.16197	1.93329	-0.69897	-1.82391	-3.30103	-5	-4	-3	-3	-3.30103	-2.69897	-4.30103	-2.09691	-3	5.33333	0.235702	1.21454	0.0744473	0.2307	0.0276634
0.30103	-1.69897	1.32222	2.09968	1.00456	-0.30103	0.209783	-1.69897	-1.69897	-1.69897	-1.69897	-1.69897	-1.69897	-1.69897	-1.69897	-1.69897	-1.69897	-1.69897	-1.69897	-1.69897	-1.69897	-1.69897	-1.69897	-1.69897	-1.69897	-2	-1.69897	2.16197	1.93329	-0.69897	-1.82391	-3.30103	-5	-4	-3	-3	-3.30103	-2.69897	-4.30103	-2.09691	-3	5	0	1.15494	0.040391	0.253878	0.00106574
0.30103	-1.69897	2.3032	2.09968	2.00046	-0.30103	0.209783	-1.69897	-1.69897	-1.69897	-1.69897	-1.69897	-1.69897	-1.69897	-1.69897	-1.69897	-1.69897	-1.69897	-1.69897	-1.69897	-1.69897	-1.69897	-1.69897	-1.69897	-1.69897	-2	-1.69897	2.16197	1.93329	-0.69897	-1.82391	-3.30103	-5	-4	-3	-3	-3.30103	-2.69897	-4.30103	-2.09691	-3	5.66667	0.235702	1.04953	0.0494158	0.234933	0.00343053
0.30103	-1.69897	0.30103	2.09968	0.043602	-0.30103	-0.206908	-1.69897	-1.69897	-1.69897	-1.69897	-1.69897	-1.69897	-1.69897	-1.69897	-1.69897	-1.69897	-1.69897	-1.69897	-1.69897	-1.69897	-1.69897	-1.69897	-1.69897	-1.69897	-2	-1.69897	2.16197	1.93329	-0.69897	-1.82391	-3.30103	-5	-4	-3	-3	-3.30103	-2.69897	-4.30103	-2.09691	-3	5.375	0.29756	1.2201	0.124023	0.247239	0.00325024
0.30103	-1.69897	0.322219	2.09968	0.043602	-0.30103	-0.142065	-1.69897	-1.69897	-1.69897	-1.69897	-1.69897	-1.69897	-1.69897	-1.69897	-1.69897	-1.69897	-1.69897	-1.69897	-1.69897	-1.69897	-1.69897	-1.69897	-1.69897	-1.69897	-2	-1.69897	2.16197	1.93329	-0.69897	-1.82391	-3.30103	-5	-4	-3	-3	-3.30103	-2.69897	-4.30103	-2.09691	-3	5.16667	0.235702	1.24605	0.194854	0.253567	0.00729261
0.30103	-1.69897	1.07918	2.09968	0.043602	-0.30103	1.02617	-1.69897	-1.69897	-1.69897	-1.69897	-1.69897	-1.69897	-1.69897	-1.69897	-1.69897	-1.69897	-1.69897	-1.69897	-1.69897	-1.69897	-1.69897	-1.69897	-1.69897	-1.69897	-2	-1.69897	2.16197	1.93329	-0.69897	-1.82391	-3.30103	-5	-4	-3	-3	-3.30103	-2.69897	-4.30103	-2.09691	-3	5.16667	0.235702	1.16348	0.0750382	0.266167	0.000975249
0.30103	-1.69897	2.0086	2.09968	0.043602	-0.30103	2.00269	-1.69897	-1.69897	-1.69897	-1.69897	-1.69897	-1.69897	-1.69897	-1.69897	-1.69897	-1.69897	-1.69897	-1.69897	-1.69897	-1.69897	-1.69897	-1.69897	-1.69897	-1.69897	-2	-1.69897	2.16197	1.93329	-0.69897	-1.82391	-3.30103	-5	-4	-3	-3	-3.30103	-2.69897	-4.30103	-2.09691	-3	5.41667	0.343592	1.19675	0.0623538	0.2647	0.00464949
0.30103	-1.69897	0.477121	2.09968	0.043602	-0.30103	0.209783	-4.69897	-1.69897	-1.69897	-1.69897	-1.69897	-1.69897	-1.69897	-1.69897	-1.69897	-1.69897	-1.69897	-1.69897	-1.69897	-1.69897	-1.69897	-1.69897	-1.69897	-1.69897	-2	-1.69897	2.16197	1.93329	-0.69897	-1.82391	-3.30103	-5	-4	-3	-3	-3.30103	-2.69897	-4.30103	-2.09691	-3	5.25	0.25	1.23475	0.103674	0.3001	0.0451551
0.30103	-1.69897	0.477121	2.09968	0.043602	-0.30103	0.209783	-2.69897	-1.69897	-1.69897	-1.69897	-1.69897	-1.69897	-1.69897	-1.69897	-1.69897	-1.69897	-1.69897	-1.69897	-1.69897	-1.69897	-1.69897	-1.69897	-1.69897	-1.69897	-2	-1.69897	2.16197	1.93329	-0.69897	-1.82391	-3.30103	-5	-4	-3	-3	-3.30103	-2.69897	-4.30103	-2.09691	-3	5.16667	0.311805	1.28648	0.0843911	0.2676	0.00484672
0.30103	-1.69897	0.477121	2.09968	0.043602	-0.30103	0.209783	-0.69897	-1.69897	-1.69897	-1.69897	-1.69897	-1.69897	-1.69897	-1.69897	-1.69897	-1.69897	-1.69897	-1.69897	-1.69897	-1.69897	-1.69897	-1.69897	-1.69897	-1.69897	-2	-1.69897	2.16197	1.93329	-0.69897	-1.82391	-3.30103	-5	-4	-3	-3	-3.30103	-2.69897	-4.30103	-2.09691	-3	4.91667	0.399653	1.22757	0.101201	0.267156	0.00268684
0.30103	-1.69897	0.477121	2.09968	0.043602	-0.30103	0.209783	0.30103	-1.69897	-1.69897	-1.69897	-1.69897	-1.69897	-1.69897	-1.69897	-1.69897	-1.69897	-1.69897	-1.69897	-1.69897	-1.69897	-1.69897	-1.69897	-1.69897	-1.69897	-2	-1.69897	2.16197	1.93329	-0.69897	-1.82391	-3.30103	-5	-4	-3	-3	-3.30103	-2.69897	-4.30103	-2.09691	-3	4.95833	0.246503	1.20015	0.152044	0.321572	0.00741802
0.30103	-1.69897	0.477121	2.09968	0.043602	-0.30103	0.204391	-1.69897	-4.69897	-1.69897	-1.69897	-1.69897	-1.69897	-1.69897	-1.69897	-1.69897	-1.69897	-1.69897	-1.69897	-1.69897	-1.69897	-1.69897	-1.69897	-1.69897	-1.69897	-2	-1.69897	2.16197	1.93329	-0.69897	-1.82391	-3.30103	-5	-4	-3	-3	-3.30103	-2.69897	-4.30103	-2.09691	-3	5.16667	0.235702	1.15709	0.134924	0.264711	0.00969807
0.30103	-1.69897	0.477121	2.09968	0.043602	-0.30103	0.204934	-1.69897	-2.69897	-1.69897	-1.69897	-1.69897	-1.69897	-1.69897	-1.69897	-1.69897	-1.69897	-1.69897	-1.69897	-1.69897	-1.69897	-1.69897	-1.69897	-1.69897	-1.69897	-2	-1.69897	2.16197	1.93329	-0.69897	-1.82391	-3.30103	-5	-4	-3	-3	-3.30103	-2.69897	-4.30103	-2.09691	-3	5.33333	0.235702	1.13678	0.0702434	0.253794	0.00532544
0.30103	-1.69897	0.477121	2.09968	0.043602	-0.30103	0.255514	-1.69897	-0.69897	-1.69897	-1.69897	-1.69897	-1.69897	-1.69897	-1.69897	-1.69897	-1.69897	-1.69897	-1.69897	-1.69897	-1.69897	-1.69897	-1.69897	-1.69897	-1.69897	-2	-1.69897	2.16197	1.93329	-0.69897	-1.82391	-3.30103	-5	-4	-3	-3	-3.30103	-2.69897	-4.30103	-2.09691	-3	5.04167	0.246503	1.15224	0.0985663	0.271461	0.00650848
0.30103	-1.69897	0.477121	2.09968	0.043602	-0.30103	0.556423	-1.69897	0.30103	-1.69897	-1.69897	-1.69897	-1.69897	-1.69897	-1.69897	-1.69897	-1.69897	-1.69897	-1.69897	-1.69897	-1.69897	-1.69897	-1.69897	-1.69897	-1.69897	-2	-1.69897	2.16197	1.93329	-0.69897	-1.82391	-3.30103	-5	-4	-3	-3	-3.30103	-2.69897	-4.30103	-2.09691	-3	5.08333	0.186339	1.14737	0.0608843	0.280406	0.00903743
0.30103	-1.69897	0.477121	2.09968	0.043602	-0.30103	0.209783	-1.69897	-1.69897	-4.69897	-1.69897	-1.69897	-1.69897	-1.69897	-1.69897	-1.69897	-1.69897	-1.69897	-1.69897	-1.69897	-1.69897	-1.69897	-1.69897	-1.69897	-1.69897	-2	-1.69897	2.16197	1.93329	-0.69897	-1.82391	-3.30103	-5	-4	-3	-3	-3.30103	-2.69897	-4.30103	-2.09691	-3	5.125	0.216506	1.07226	0.126414	0.252656	0.00591817
0.30103	-1.69897	0.477121	2.09968	0.043602	-0.30103	0.209783	-1.69897	-1.69897	-2.69897	-1.69897	-1.69897	-1.69897	-1.69897	-1.69897	-1.69897	-1.69897	-1.69897	-1.69897	-1.69897	-1.69897	-1.69897	-1.69897	-1.69897	-1.69897	-2	-1.69897	2.16197	1.93329	-0.69897	-1.82391	-3.30103	-5	-4	-3	-3	-3.30103	-2.69897	-4.30103	-2.09691	-3	5.16667	0.235702	1.20539	0.0690562	0.2501	0.0102261
0.30103	-1.69897	0.477121	2.09968	0.043602	-0.30103	0.209783	-1.69897	-1.69897	-0.69897	-1.69897	-1.69897	-1.69897	-1.69897	-1.69897	-1.69897	-1.69897	-1.69897	-1.69897	-1.69897	-1.69897	-1.69897	-1.69897	-1.69897	-1.69897	-2	-1.69897	2.16197	1.93329	-0.69897	-1.82391	-3.30103	-5	-4	-3	-3	-3.30103	-2.69897	-4.30103	-2.09691	-3	5.16667	0.235702	1.12869	0.087862	0.273989	0.0106808
0.30103	-1.69897	0.477121	2.09968	0.043602	-0.30103	0.209783	-1.69897	-1.69897	0.30103	-1.69897	-1.69897	-1.69897	-1.69897	-1.69897	-1.69897	-1.69897	-1.69897	-1.69897	-1.69897	-1.69897	-1.69897	-1.69897	-1.69897	-1.69897	-2	-1.69897	2.16197	1.93329	-0.69897	-1.82391	-3.30103	-5	-4	-3	-3	-3.30103	-2.69897	-4.30103	-2.09691	-3	5.33333	0.311805	1.11913	0.149177	0.272615	0.00851898
0.30103	-1.69897	0.477121	2.09968	0.043602	-0.30103	0.209783	-1.69897	-1.69897	-1.69897	-4.69897	-1.69897	-1.69897	-1.69897	-1.69897	-1.69897	-1.69897	-1.69897	-1.69897	-1.69897	-1.69897	-1.69897	-1.69897	-1.69897	-1.69897	-2	-1.69897	2.16197	1.93329	-0.69897	-1.82391	-3.30103	-5	-4	-3	-3	-3.30103	-2.69897	-4.30103	-2.09691	-3	7.25	0.25	1.06169	0.0487601	0.256211	0.00943235
0.30103	-1.69897	0.477121	2.09968	0.043602	-0.30103	0.209783	-1.69897	-1.69897	-1.69897	-2.69897	-1.69897	-1.69897	-1.69897	-1.69897	-1.69897	-1.69897	-1.69897	-1.69897	-1.69897	-1.69897	-1.69897	-1.69897	-1.69897	-1.69897	-2	-1.69897	2.16197	1.93329	-0.69897	-1.82391	-3.30103	-5	-4	-3	-3	-3.30103	-2.69897	-4.30103	-2.09691	-3	6.66667	0.235702	1.01345	0.0501435	0.264174	0.00284921
0.30103	-1.69897	0.477121	2.09968	0.043602	-0.30103	0.209783	-1.69897	-1.69897	-1.69897	-0.69897	-1.69897	-1.69897	-1.69897	-1.69897	-1.69897	-1.69897	-1.69897	-1.69897	-1.69897	-1.69897	-1.69897	-1.69897	-1.69897	-1.69897	-2	-1.69897	2.16197	1.93329	-0.69897	-1.82391	-3.30103	-5	-4	-3	-3	-3.30103	-2.69897	-4.30103	-2.09691	-3	4.625	0.29756	1.26365	0.0876373	0.271989	0.0064454
0.30103	-1.69897	0.477121	2.09968	0.043602	-0.30103	0.209783	-1.69897	-1.69897	-1.69897	0.30103	-1.69897	-1.69897	-1.69897	-1.69897	-1.69897	-1.69897	-1.69897	-1.69897	-1.69897	-1.69897	-1.69897	-1.69897	-1.69897	-1.69897	-2	-1.69897	2.16197	1.93329	-0.69897	-1.82391	-3.30103	-5	-4	-3	-3	-3.30103	-2.69897	-4.30103	-2.09691	-3	4.33333	0.311805	1.23891	0.0769941	0.350827	0.00671621
0.30103	-1.69897	0.477121	2.09968	0.043602	-0.30103	0.204391	-1.69897	-1.69897	-1.69897	-1.69897	-4.69897	-1.69897	-1.69897	-1.69897	-1.69897	-1.69897	-1.69897	-1.69897	-1.69897	-1.69897	-1.69897	-1.69897	-1.69897	-1.69897	-2	-1.69897	2.16197	1.93329	-0.69897	-1.82391	-3.30103	-5	-4	-3	-3	-3.30103	-2.69897	-4.30103	-2.09691	-3	5.25	0.322749	1.18272	0.0978727	0.242794	0.00542023
0.30103	-1.69897	0.477121	2.09968	0.043602	-0.30103	0.204934	-1.69897	-1.69897	-1.69897	-1.69897	-2.69897	-1.69897	-1.69897	-1.69897	-1.69897	-1.69897	-1.69897	-1.69897	-1.69897	-1.69897	-1.69897	-1.69897	-1.69897	-1.69897	-2	-1.69897	2.16197	1.93329	-0.69897	-1.82391	-3.30103	-5	-4	-3	-3	-3.30103	-2.69897	-4.30103	-2.09691	-3	5.20833	0.246503	1.27848	0.169758	0.246989	0.0044749
0.30103	-1.69897	0.477121	2.09968	0.043602	-0.30103	0.255514	-1.69897	-1.69897	-1.69897	-1.69897	-0.69897	-1.69897	-1.69897	-1.69897	-1.69897	-1.69897	-1.69897	-1.69897	-1.69897	-1.69897	-1.69897	-1.69897	-1.69897	-1.69897	-2	-1.69897	2.16197	1.93329	-0.69897	-1.82391	-3.30103	-5	-4	-3	-3	-3.30103	-2.69897	-4.30103	-2.09691	-3	5.58333	0.276385	1.11982	0.08918	0.248767	0.0261625
0.30103	-1.69897	0.477121	2.09968	0.043602	-0.30103	0.556423	-1.69897	-1.69897	-1.69897	-1.69897	0.30103	-1.69897	-1.69897	-1.69897	-1.69897	-1.69897	-1.69897	-1.69897	-1.69897	-1.69897	-1.69897	-1.69897	-1.69897	-1.69897	-2	-1.69897	2.16197	1.93329	-0.69897	-1.82391	-3.30103	-5	-4	-3	-3	-3.30103	-2.69897	-4.30103	-2.09691	-3	7.375	0.414578	0.865375	0.0858192	0.254767	0.00829435
0.30103	-1.69897	0.477121	2.09968	0.043602	-0.30103	0.204391	-1.69897	-1.69897	-1.69897	-1.69897	-1.69897	-4.69897	-1.69897	-1.69897	-1.69897	-1.69897	-1.69897	-1.69897	-1.69897	-1.69897	-1.69897	-1.69897	-1.69897	-1.69897	-2	-1.69897	2.16197	1.93329	-0.69897	-1.82391	-3.30103	-5	-4	-3	-3	-3.30103	-2.69897	-4.30103	-2.09691	-3	4.875	0.360844	1.29713	0.140108	0.255239	0.00731368
0.30103	-1.69897	0.477121	2.09968	0.043602	-0.30103	0.204934	-1.69897	-1.69897	-1.69897	-1.69897	-1.69897	-2.69897	-1.69897	-1.69897	-1.69897	-1.69897	-1.69897	-1.69897	-1.69897	-1.69897	-1.69897	-1.69897	-1.69897	-1.69897	-2	-1.69897	2.16197	1.93329	-0.69897	-1.82391	-3.30103	-5	-4	-3	-3	-3.30103	-2.69897	-4.30103	-2.09691	-3	4.95833	0.320048	1.19756	0.0721446	0.26585	0.013298
0.30103	-1.69897	0.477121	2.09968	0.043602	-0.30103	0.255514	-1.69897	-1.69897	-1.69897	-1.69897	-1.69897	-0.69897	-1.69897	-1.69897	-1.69897	-1.69897	-1.69897	-1.69897	-1.69897	-1.69897	-1.69897	-1.69897	-1.69897	-1.69897	-2	-1.69897	2.16197	1.93329	-0.69897	-1.82391	-3.30103	-5	-4	-3	-3	-3.30103	-2.69897	-4.30103	-2.09691	-3	6.125	0.29756	1.06509	0.0310329	0.29285	0.0621934
0.30103	-1.69897	0.477121	2.09968	0.043602	-0.30103	0.556423	-1.69897	-1.69897	-1.69897	-1.69897	-1.69897	0.30103	-1.69897	-1.69897	-1.69897	-1.69897	-1.69897	-1.69897	-1.69897	-1.69897	-1.69897	-1.69897	-1.69897	-1.69897	-2	-1.69897	2.16197	1.93329	-0.69897	-1.82391	-3.30103	-5	-4	-3	-3	-3.30103	-2.69897	-4.30103	-2.09691	-3	6.79167	0.246503	1.05174	0.0624341	0.301822	0.0233059
0.30103	-1.69897	0.477121	2.09968	0.043602	-0.30103	0.209783	-1.69897	-1.69897	-1.69897	-1.69897	-1.69897	-1.69897	-4.69897	-1.69897	-1.69897	-1.69897	-1.69897	-1.69897	-1.69897	-1.69897	-1.69897	-1.69897	-1.69897	-1.69897	-2	-1.69897	2.16197	1.93329	-0.69897	-1.82391	-3.30103	-5	-4	-3	-3	-3.30103	-2.69897	-4.30103	-2.09691	-3	5.29167	0.379601	1.18133	0.0590229	0.25935	0.0178009
0.30103	-1.69897	0.477121	2.09968	0.043602	-0.30103	0.209783	-1.69897	-1.69897	-1.69897	-1.69897	-1.69897	-1.69897	-2.69897	-1.69897	-1.69897	-1.69897	-1.69897	-1.69897	-1.69897	-1.69897	-1.69897	-1.69897	-1.69897	-1.69897	-2	-1.69897	2.16197	1.93329	-0.69897	-1.82391	-3.30103	-5	-4	-3	-3	-3.30103	-2.69897	-4.30103	-2.09691	-3	4.91667	0.276385	1.25451	0.136641	0.265267	0.014325
0.30103	-1.69897	0.477121	2.09968	0.043602	-0.30103	0.209783	-1.69897	-1.69897	-1.69897	-1.69897	-1.69897	-1.69897	-0.69897	-1.69897	-1.69897	-1.69897	-1.69897	-1.69897	-1.69897	-1.69897	-1.69897	-1.69897	-1.69897	-1.69897	-2	-1.69897	2.16197	1.93329	-0.69897	-1.82391	-3.30103	-5	-4	-3	-3	-3.30103	-2.69897	-4.30103	-2.09691	-3	5.45833	0.379601	1.12877	0.0624999	0.269378	0.00842157
0.30103	-1.69897	0.477121	2.09968	0.043602	-0.30103	0.209783	-1.69897	-1.69897	-1.69897	-1.69897	-1.69897	-1.69897	0.30103	-1.69897	-1.69897	-1.69897	-1.69897	-1.69897	-1.69897	-1.69897	-1.69897	-1.69897	-1.69897	-1.69897	-2	-1.69897	2.16197	1.93329	-0.69897	-1.82391	-3.30103	-5	-4	-3	-3	-3.30103	-2.69897	-4.30103	-2.09691	-3	5.41667	0.276385	1.18736	0.10806	0.356378	0.0232987
0.30103	-1.69897	0.477121	2.09968	0.043602	-0.30103	0.209783	-1.69897	-1.69897	-1.69897	-1.69897	-1.69897	-1.69897	-1.69897	-4.69897	-1.69897	-1.69897	-1.69897	-1.69897	-1.69897	-1.69897	-1.69897	-1.69897	-1.69897	-1.69897	-2	-1.69897	2.16197	1.93329	-0.69897	-1.82391	-3.30103	-5	-4	-3	-3	-3.30103	-2.69897	-4.30103	-2.09691	-3	5.20833	0.320048	1.1681	0.0923918	0.255767	0.00362859
0.30103	-1.69897	0.477121	2.09968	0.043602	-0.30103	0.209783	-1.69897	-1.69897	-1.69897	-1.69897	-1.69897	-1.69897	-1.69897	-2.69897	-1.69897	-1.69897	-1.69897	-1.69897	-1.69897	-1.69897	-1.69897	-1.69897	-1.69897	-1.69897	-2	-1.69897	2.16197	1.93329	-0.69897	-1.82391	-3.30103	-5	-4	-3	-3	-3.30103	-2.69897	-4.30103	-2.09691	-3	4.91667	0.399653	1.2585	0.175075	0.264489	0.0163037
0.30103	-1.69897	0.477121	2.09968	0.043602	-0.30103	0.209783	-1.69897	-1.69897	-1.69897	-1.69897	-1.69897	-1.69897	-1.69897	-0.69897	-1.69897	-1.69897	-1.69897	-1.69897	-1.69897	-1.69897	-1.69897	-1.69897	-1.69897	-1.69897	-2	-1.69897	2.16197	1.93329	-0.69897	-1.82391	-3.30103	-5	-4	-3	-3	-3.30103	-2.69897	-4.30103	-2.09691	-3	5.375	0.462106	1.31366	0.150084	0.263544	0.0170895
0.30103	-1.69897	0.477121	2.09968	0.043602	-0.30103	0.209783	-1.69897	-1.69897	-1.69897	-1.69897	-1.69897	-1.69897	-1.69897	0.30103	-1.69897	-1.69897	-1.69897	-1.69897	-1.69897	-1.69897	-1.69897	-1.69897	-1.69897	-1.69897	-2	-1.69897	2.16197	1.93329	-0.69897	-1.82391	-3.30103	-5	-4	-3	-3	-3.30103	-2.69897	-4.30103	-2.09691	-3	5.20833	0.379601	1.24315	0.111661	0.286433	0.0088934
0.30103	-1.69897	0.477121	2.09968	0.043602	-0.30103	0.204391	-1.69897	-1.69897	-1.69897	-1.69897	-1.69897	-1.69897	-1.69897	-1.69897	-4.69897	-1.69897	-1.69897	-1.69897	-1.69897	-1.69897	-1.69897	-1.69897	-1.69897	-1.69897	-2	-1.69897	2.16197	1.93329	-0.69897	-1.82391	-3.30103	-5	-4	-3	-3	-3.30103	-2.69897	-4.30103	-2.09691	-3	5.25	0.25	1.23573	0.18486	0.252433	0.00413412
0.30103	-1.69897	0.477121	2.09968	0.043602	-0.30103	0.204934	-1.69897	-1.69897	-1.69897	-1.69897	-1.69897	-1.69897	-1.69897	-1.69897	-2.69897	-1.69897	-1.69897	-1.69897	-1.69897	-1.69897	-1.69897	-1.69897	-1.69897	-1.69897	-2	-1.69897	2.16197	1.93329	-0.69897	-1.82391	-3.30103	-5	-4	-3	-3	-3.30103	-2.69897	-4.30103	-2.09691	-3	5.08333	0.276385	1.30696	0.152312	0.257933	0.00169476
0.30103	-1.69897	0.477121	2.09968	0.043602	-0.30103	0.255514	-1.69897	-1.69897	-1.69897	-1.69897	-1.69897	-1.69897	-1.69897	-1.69897	-0.69897	-1.69897	-1.69897	-1.69897	-1.69897	-1.69897	-1.69897	-1.69897	-1.69897	-1.69897	-2	-1.69897	2.16197	1.93329	-0.69897	-1.82391	-3.30103	-5	-4	-3	-3	-3.30103	-2.69897	-4.30103	-2.09691	-3	5.29167	0.320048	1.1978	0.0851909	0.265878	0.0161213
0.30103	-1.69897	0.477121	2.09968	0.043602	-0.30103	0.556423	-1.69897	-1.69897	-1.69897	-1.69897	-1.69897	-1.69897	-1.69897	-1.69897	0.30103	-1.69897	-1.69897	-1.69897	-1.69897	-1.69897	-1.69897	-1.69897	-1.69897	-1.69897	-2	-1.69897	2.16197	1.93329	-0.69897	-1.82391	-3.30103	-5	-4	-3	-3	-3.30103	-2.69897	-4.30103	-2.09691	-3	5.54167	0.379601	1.1745	0.0823049	0.264072	0.0165387
0.30103	-1.69897	0.477121	2.09968	0.043602	-0.30103	0.209783	-1.69897	-1.69897	-1.69897	-1.69897	-1.69897	-1.69897	-1.69897	-1.69897	-1.69897	-4.69897	-1.69897	-1.69897	-1.69897	-1.69897	-1.69897	-1.69897	-1.69897	-1.69897	-2	-1.69897	2.16197	1.93329	-0.69897	-1.82391	-3.30103	-5	-4	-3	-3	-3.30103	-2.69897	-4.30103	-2.09691	-3	0	0	0	0	0	0
0.30103	-1.69897	0.477121	2.09968	0.043602	-0.30103	0.209783	-1.69897	-1.69897	-1.69897	-1.69897	-1.69897	-1.69897	-1.69897	-1.69897	-1.69897	-2.69897	-1.69897	-1.69897	-1.69897	-1.69897	-1.69897	-1.69897	-1.69897	-1.69897	-2	-1.69897	2.16197	1.93329	-0.69897	-1.82391	-3.30103	-5	-4	-3	-3	-3.30103	-2.69897	-4.30103	-2.09691	-3	1.875	2.65852	0.329774	0.49078	0.00305758	0.0050058
0.30103	-1.69897	0.477121	2.09968	0.043602	-0.30103	0.209783	-1.69897	-1.69897	-1.69897	-1.69897	-1.69897	-1.69897	-1.69897	-1.69897	-1.69897	-0.69897	-1.69897	-1.69897	-1.69897	-1.69897	-1.69897	-1.69897	-1.69897	-1.69897	-2	-1.69897	2.16197	1.93329	-0.69897	-1.82391	-3.30103	-5	-4	-3	-3	-3.30103	-2.69897	-4.30103	-2.09691	-3	5.29167	0.320048	1.21808	0.175772	0.270647	0.0124552
0.30103	-1.69897	0.477121	2.09968	0.043602	-0.30103	0.209783	-1.69897	-1.69897	-1.69897	-1.69897	-1.69897	-1.69897	-1.69897	-1.69897	-1.69897	0.30103	-1.69897	-1.69897	-1.69897	-1.69897	-1.69897	-1.69897	-1.69897	-1.69897	-2	-1.69897	2.16197	1.93329	-0.69897	-1.82391	-3.30103	-5	-4	-3	-3	-3.30103	-2.69897	-4.30103	-2.09691	-3	6.125	0.216506	1.07708	0.055451	0.2601	0.00487055
0.30103	-1.69897	0.477121	2.09968	0.043602	-0.30103	0.209783	-1.69897	-1.69897	-1.69897	-1.69897	-1.69897	-1.69897	-1.69897	-1.69897	-1.69897	-1.69897	-4.69897	-1.69897	-1.69897	-1.69897	-1.69897	-1.69897	-1.69897	-1.69897	-2	-1.69897	2.16197	1.93329	-0.69897	-1.82391	-3.30103	-5	-4	-3	-3	-3.30103	-2.69897	-4.30103	-2.09691	-3	5.25	0.25	1.23035	0.0948225	0.257044	0.0247367
0.30103	-1.69897	0.477121	2.09968	0.043602	-0.30103	0.209783	-1.69897	-1.69897	-1.69897	-1.69897	-1.69897	-1.69897	-1.69897	-1.69897	-1.69897	-1.69897	-2.69897	-1.69897	-1.69897	-1.69897	-1.69897	-1.69897	-1.69897	-1.69897	-2	-1.69897	2.16197	1.93329	-0.69897	-1.82391	-3.30103	-5	-4	-3	-3	-3.30103	-2.69897	-4.30103	-2.09691	-3	5	0.288675	1.12321	0.0721505	0.233267	0.00720686
0.30103	-1.69897	0.477121	2.09968	0.043602	-0.30103	0.209783	-1.69897	-1.69897	-1.69897	-1.69897	-1.69897	-1.69897	-1.69897	-1.69897	-1.69897	-1.69897	-0.69897	-1.69897	-1.69897	-1.69897	-1.69897	-1.69897	-1.69897	-1.69897	-2	-1.69897	2.16197	1.93329	-0.69897	-1.82391	-3.30103	-5	-4	-3	-3	-3.30103	-2.69897	-4.30103	-2.09691	-3	4.5	0	1.37399	0.15234	0.222282	0.0113808
0.30103	-1.69897	0.477121	2.09968	0.043602	-0.30103	0.209783	-1.69897	-1.69897	-1.69897	-1.69897	-1.69897	-1.69897	-1.69897	-1.69897	-1.69897	-1.69897	0.30103	-1.69897	-1.69897	-1.69897	-1.69897	-1.69897	-1.69897	-1.69897	-2	-1.69897	2.16197	1.93329	-0.69897	-1.82391	-3.30103	-5	-4	-3	-3	-3.30103	-2.69897	-4.30103	-2.09691	-3	6.45833	0.320048	0.930845	0.042462	0.258044	0.00367129
0.30103	-1.69897	0.477121	2.09968	0.043602	-0.30103	0.204391	-1.69897	-1.69897	-1.69897	-1.69897	-1.69897	-1.69897	-1.69897	-1.69897	-1.69897	-1.69897	-1.69897	-4.69897	-1.69897	-1.69897	-1.69897	-1.69897	-1.69897	-1.69897	-2	-1.69897	2.16197	1.93329	-0.69897	-1.82391	-3.30103	-5	-4	-3	-3	-3.30103	-2.69897	-4.30103	-2.09691	-3	6.91667	0.276385	1.01402	0.0565111	0.267294	0.062287
0.30103	-1.69897	0.477121	2.09968	0.043602	-0.30103	0.204934	-1.69897	-1.69897	-1.69897	-1.69897	-1.69897	-1.69897	-1.69897	-1.69897	-1.69897	-1.69897	-1.69897	-2.69897	-1.69897	-1.69897	-1.69897	-1.69897	-1.69897	-1.69897	-2	-1.69897	2.16197	1.93329	-0.69897	-1.82391	-3.30103	-5	-4	-3	-3	-3.30103	-2.69897	-4.30103	-2.09691	-3	4.79167	0.320048	1.14932	0.100219	0.260822	0.00581001
0.30103	-1.69897	0.477121	2.09968	0.043602	-0.30103	0.255514	-1.69897	-1.69897	-1.69897	-1.69897	-1.69897	-1.69897	-1.69897	-1.69897	-1.69897	-1.69897	-1.69897	-0.69897	-1.69897	-1.69897	-1.69897	-1.69897	-1.69897	-1.69897	-2	-1.69897	2.16197	1.93329	-0.69897	-1.82391	-3.30103	-5	-4	-3	-3	-3.30103	-2.69897	-4.30103	-2.09691	-3	4.83333	0.311805	1.15574	0.116722	0.275878	0.00648122
0.30103	-1.69897	0.477121	2.09968	0.043602	-0.30103	0.556423	-1.69897	-1.69897	-1.69897	-1.69897	-1.69897	-1.69897	-1.69897	-1.69897	-1.69897	-1.69897	-1.69897	0.30103	-1.69897	-1.69897	-1.69897	-1.69897	-1.69897	-1.69897	-2	-1.69897	2.16197	1.93329	-0.69897	-1.82391	-3.30103	-5	-4	-3	-3	-3.30103	-2.69897	-4.30103	-2.09691	-3	5.04167	0.379601	1.26276	0.1137	0.275711	0.0030302
0.30103	-1.69897	0.477121	2.09968	0.043602	-0.30103	0.209783	-1.69897	-1.69897	-1.69897	-1.69897	-1.69897	-1.69897	-1.69897	-1.69897	-1.69897	-1.69897	-1.69897	-1.69897	-4.69897	-1.69897	-1.69897	-1.69897	-1.69897	-1.69897	-2	-1.69897	2.16197	1.93329	-0.69897	-1.82391	-3.30103	-5	-4	-3	-3	-3.30103	-2.69897	-4.30103	-2.09691	-3	7.70833	0.320048	0.905795	0.0634823	0.313676	0.0643865
0.30103	-1.69897	0.477121	2.09968	0.043602	-0.30103	0.209783	-1.69897	-1.69897	-1.69897	-1.69897	-1.69897	-1.69897	-1.69897	-1.69897	-1.69897	-1.69897	-1.69897	-1.69897	-2.69897	-1.69897	-1.69897	-1.69897	-1.69897	-1.69897	-2	-1.69897	2.16197	1.93329	-0.69897	-1.82391	-3.30103	-5	-4	-3	-3	-3.30103	-2.69897	-4.30103	-2.09691	-3	4.91667	0.186339	0.932356	0.0789149	0.252645	0.00630099
0.30103	-1.69897	0.477121	2.09968	0.043602	-0.30103	0.209783	-1.69897	-1.69897	-1.69897	-1.69897	-1.69897	-1.69897	-1.69897	-1.69897	-1.69897	-1.69897	-1.69897	-1.69897	-0.69897	-1.69897	-1.69897	-1.69897	-1.69897	-1.69897	-2	-1.69897	2.16197	1.93329	-0.69897	-1.82391	-3.30103	-5	-4	-3	-3	-3.30103	-2.69897	-4.30103	-2.09691	-3	4.79167	0.246503	1.14198	0.100918	0.279544	0.00987358
0.30103	-1.69897	0.477121	2.09968	0.043602	-0.30103	0.209783	-1.69897	-1.69897	-1.69897	-1.69897	-1.69897	-1.69897	-1.69897	-1.69897	-1.69897	-1.69897	-1.69897	-1.69897	0.30103	-1.69897	-1.69897	-1.69897	-1.69897	-1.69897	-2	-1.69897	2.16197	1.93329	-0.69897	-1.82391	-3.30103	-5	-4	-3	-3	-3.30103	-2.69897	-4.30103	-2.09691	-3	4.58333	0.276385	1.10792	0.0852305	0.277656	0.00446454
0.30103	-1.69897	0.477121	2.09968	0.043602	-0.30103	0.209783	-1.69897	-1.69897	-1.69897	-1.69897	-1.69897	-1.69897	-1.69897	-1.69897	-1.69897	-1.69897	-1.69897	-1.69897	-1.69897	-4.69897	-1.69897	-1.69897	-1.69897	-1.69897	-2	-1.69897	2.16197	1.93329	-0.69897	-1.82391	-3.30103	-5	-4	-3	-3	-3.30103	-2.69897	-4.30103	-2.09691	-3	5.16667	0.513701	1.13372	0.0925423	0.264039	0.0126721
0.30103	-1.69897	0.477121	2.09968	0.043602	-0.30103	0.209783	-1.69897	-1.69897	-1.69897	-1.69897	-1.69897	-1.69897	-1.69897	-1.69897	-1.69897	-1.69897	-1.69897	-1.69897	-1.69897	-2.69897	-1.69897	-1.69897	-1.69897	-1.69897	-2	-1.69897	2.16197	1.93329	-0.69897	-1.82391	-3.30103	-5	-4	-3	-3	-3.30103	-2.69897	-4.30103	-2.09691	-3	4.91667	0.276385	1.13936	0.0872279	0.2616	0.00704286
0.30103	-1.69897	0.477121	2.09968	0.043602	-0.30103	0.209783	-1.69897	-1.69897	-1.69897	-1.69897	-1.69897	-1.69897	-1.69897	-1.69897	-1.69897	-1.69897	-1.69897	-1.69897	-1.69897	-0.69897	-1.69897	-1.69897	-1.69897	-1.69897	-2	-1.69897	2.16197	1.93329	-0.69897	-1.82391	-3.30103	-5	-4	-3	-3	-3.30103	-2.69897	-4.30103	-2.09691	-3	4.70833	0.246503	1.26121	0.170756	0.258026	0.00314967
0.30103	-1.69897	0.477121	2.09968	0.043602	-0.30103	0.209783	-1.69897	-1.69897	-1.69897	-1.69897	-1.69897	-1.69897	-1.69897	-1.69897	-1.69897	-1.69897	-1.69897	-1.69897	-1.69897	0.30103	-1.69897	-1.69897	-1.69897	-1.69897	-2	-1.69897	2.16197	1.93329	-0.69897	-1.82391	-3.30103	-5	-4	-3	-3	-3.30103	-2.69897	-4.30103	-2.09691	-3	4.75	0.25	1.20674	0.0615946	0.274128	0.0155358
0.30103	-1.69897	0.477121	2.09968	0.043602	-0.30103	0.209783	-1.69897	-1.69897	-1.69897	-1.69897	-1.69897	-1.69897	-1.69897	-1.69897	-1.69897	-1.69897	-1.69897	-1.69897	-1.69897	-1.69897	-4.69897	-1.69897	-1.69897	-1.69897	-2	-1.69897	2.16197	1.93329	-0.69897	-1.82391	-3.30103	-5	-4	-3	-3	-3.30103	-2.69897	-4.30103	-2.09691	-3	4.66667	0.235702	1.18234	0.0846179	0.249633	0.00526456
0.30103	-1.69897	0.477121	2.09968	0.043602	-0.30103	0.209783	-1.69897	-1.69897	-1.69897	-1.69897	-1.69897	-1.69897	-1.69897	-1.69897	-1.69897	-1.69897	-1.69897	-1.69897	-1.69897	-1.69897	-2.69897	-1.69897	-1.69897	-1.69897	-2	-1.69897	2.16197	1.93329	-0.69897	-1.82391	-3.30103	-5	-4	-3	-3	-3.30103	-2.69897	-4.30103	-2.09691	-3	5	0.288675	1.17432	0.0930028	0.251683	0.0152
0.30103	-1.69897	0.477121	2.09968	0.043602	-0.30103	0.209783	-1.69897	-1.69897	-1.69897	-1.69897	-1.69897	-1.69897	-1.69897	-1.69897	-1.69897	-1.69897	-1.69897	-1.69897	-1.69897	-1.69897	-0.69897	-1.69897	-1.69897	-1.69897	-2	-1.69897	2.16197	1.93329	-0.69897	-1.82391	-3.30103	-5	-4	-3	-3	-3.30103	-2.69897	-4.30103	-2.09691	-3	4.83333	0.235702	1.14657	0.0696873	0.272989	0.0172559
0.30103	-1.69897	0.477121	2.09968	0.043602	-0.30103	0.209783	-1.69897	-1.69897	-1.69897	-1.69897	-1.69897	-1.69897	-1.69897	-1.69897	-1.69897	-1.69897	-1.69897	-1.69897	-1.69897	-1.69897	0.30103	-1.69897	-1.69897	-1.69897	-2	-1.69897	2.16197	1.93329	-0.69897	-1.82391	-3.30103	-5	-4	-3	-3	-3.30103	-2.69897	-4.30103	-2.09691	-3	4.83333	0.311805	1.16862	0.127087	0.387322	0.015485
0.30103	-1.69897	0.477121	2.09968	0.043602	-0.30103	0.209783	-1.69897	-1.69897	-1.69897	-1.69897	-1.69897	-1.69897	-1.69897	-1.69897	-1.69897	-1.69897	-1.69897	-1.69897	-1.69897	-1.69897	-1.69897	-4.69897	-1.69897	-1.69897	-2	-1.69897	2.16197	1.93329	-0.69897	-1.82391	-3.30103	-5	-4	-3	-3	-3.30103	-2.69897	-4.30103	-2.09691	-3	5.16667	0.235702	1.16323	0.132893	0.27035	0.00935031
0.30103	-1.69897	0.477121	2.09968	0.043602	-0.30103	0.209783	-1.69897	-1.69897	-1.69897	-1.69897	-1.69897	-1.69897	-1.69897	-1.69897	-1.69897	-1.69897	-1.69897	-1.69897	-1.69897	-1.69897	-1.69897	-2.69897	-1.69897	-1.69897	-2	-1.69897	2.16197	1.93329	-0.69897	-1.82391	-3.30103	-5	-4	-3	-3	-3.30103	-2.69897	-4.30103	-2.09691	-3	5	0.288675	1.21353	0.0853922	0.284378	0.0302694
0.30103	-1.69897	0.477121	2.09968	0.043602	-0.30103	0.209783	-1.69897	-1.69897	-1.69897	-1.69897	-1.69897	-1.69897	-1.69897	-1.69897	-1.69897	-1.69897	-1.69897	-1.69897	-1.69897	-1.69897	-1.69897	-0.69897	-1.69897	-1.69897	-2	-1.69897	2.16197	1.93329	-0.69897	-1.82391	-3.30103	-5	-4	-3	-3	-3.30103	-2.69897	-4.30103	-2.09691	-3	4.91667	0.276385	1.30853	0.0643774	0.274711	0.014749
0.30103	-1.69897	0.477121	2.09968	0.043602	-0.30103	0.209783	-1.69897	-1.69897	-1.69897	-1.69897	-1.69897	-1.69897	-1.69897	-1.69897	-1.69897	-1.69897	-1.69897	-1.69897	-1.69897	-1.69897	-1.69897	0.30103	-1.69897	-1.69897	-2	-1.69897	2.16197	1.93329	-0.69897	-1.82391	-3.30103	-5	-4	-3	-3	-3.30103	-2.69897	-4.30103	-2.09691	-3	5.29167	0.246503	1.15256	0.0742091	0.307961	0.0165588
0.30103	-1.69897	0.477121	2.09968	0.043602	-0.30103	0.209783	-1.69897	-1.69897	-1.69897	-1.69897	-1.69897	-1.69897	-1.69897	-1.69897	-1.69897	-1.69897	-1.69897	-1.69897	-1.69897	-1.69897	-1.69897	-1.69897	-4.69897	-1.69897	-2	-1.69897	2.16197	1.93329	-0.69897	-1.82391	-3.30103	-5	-4	-3	-3	-3.30103	-2.69897	-4.30103	-2.09691	-3	5.5	0.353553	1.15608	0.109194	0.288628	0.0486525
0.30103	-1.69897	0.477121	2.09968	0.043602	-0.30103	0.209783	-1.69897	-1.69897	-1.69897	-1.69897	-1.69897	-1.69897	-1.69897	-1.69897	-1.69897	-1.69897	-1.69897	-1.69897	-1.69897	-1.69897	-1.69897	-1.69897	-2.69897	-1.69897	-2	-1.69897	2.16197	1.93329	-0.69897	-1.82391	-3.30103	-5	-4	-3	-3	-3.30103	-2.69897	-4.30103	-2.09691	-3	5.20833	0.246503	1.23691	0.145966	0.262628	0.0149273
0.30103	-1.69897	0.477121	2.09968	0.043602	-0.30103	0.209783	-1.69897	-1.69897	-1.69897	-1.69897	-1.69897	-1.69897	-1.69897	-1.69897	-1.69897	-1.69897	-1.69897	-1.69897	-1.69897	-1.69897	-1.69897	-1.69897	-0.69897	-1.69897	-2	-1.69897	2.16197	1.93329	-0.69897	-1.82391	-3.30103	-5	-4	-3	-3	-3.30103	-2.69897	-4.30103	-2.09691	-3	5	0	1.25211	0.12805	0.3041	0.0358487
0.30103	-1.69897	0.477121	2.09968	0.043602	-0.30103	0.209783	-1.69897	-1.69897	-1.69897	-1.69897	-1.69897	-1.69897	-1.69897	-1.69897	-1.69897	-1.69897	-1.69897	-1.69897	-1.69897	-1.69897	-1.69897	-1.69897	0.30103	-1.69897	-2	-1.69897	2.16197	1.93329	-0.69897	-1.82391	-3.30103	-5	-4	-3	-3	-3.30103	-2.69897	-4.30103	-2.09691	-3	5.41667	0.343592	1.13065	0.0698993	0.292878	0.00451814
0.30103	-1.69897	0.477121	2.09968	0.043602	-0.30103	0.209783	-1.69897	-1.69897	-1.69897	-1.69897	-1.69897	-1.69897	-1.69897	-1.69897	-1.69897	-1.69897	-1.69897	-1.69897	-1.69897	-1.69897	-1.69897	-1.69897	-1.69897	-4.69897	-2	-1.69897	2.16197	1.93329	-0.69897	-1.82391	-3.30103	-5	-4	-3	-3	-3.30103	-2.69897	-4.30103	-2.09691	-3	5.16667	0.311805	1.14962	0.0561787	0.2534	0.00415385
0.30103	-1.69897	0.477121	2.09968	0.043602	-0.30103	0.209783	-1.69897	-1.69897	-1.69897	-1.69897	-1.69897	-1.69897	-1.69897	-1.69897	-1.69897	-1.69897	-1.69897	-1.69897	-1.69897	-1.69897	-1.69897	-1.69897	-1.69897	-2.69897	-2	-1.69897	2.16197	1.93329	-0.69897	-1.82391	-3.30103	-5	-4	-3	-3	-3.30103	-2.69897	-4.30103	-2.09691	-3	5	0.408248	1.2606	0.0974641	0.2379	0.0108661
0.30103	-1.69897	0.477121	2.09968	0.043602	-0.30103	0.209783	-1.69897	-1.69897	-1.69897	-1.69897	-1.69897	-1.69897	-1.69897	-1.69897	-1.69897	-1.69897	-1.69897	-1.69897	-1.69897	-1.69897	-1.69897	-1.69897	-1.69897	-0.69897	-2	-1.69897	2.16197	1.93329	-0.69897	-1.82391	-3.30103	-5	-4	-3	-3	-3.30103	-2.69897	-4.30103	-2.09691	-3	5.25	0.322749	1.30357	0.140974	0.263615	0.00474046
0.30103	-1.69897	0.477121	2.09968	0.043602	-0.30103	0.209783	-1.69897	-1.69897	-1.69897	-1.69897	-1.69897	-1.69897	-1.69897	-1.69897	-1.69897	-1.69897	-1.69897	-1.69897	-1.69897	-1.69897	-1.69897	-1.69897	-1.69897	0.30103	-2	-1.69897	2.16197	1.93329	-0.69897	-1.82391	-3.30103	-5	-4	-3	-3	-3.30103	-2.69897	-4.30103	-2.09691	-3	5.08333	0.399653	1.29447	0.164054	0.309656	0.0193531
0.30103	-1.69897	0.477121	2.09968	0.043602	-0.30103	0.209783	-1.69897	-1.69897	-1.69897	-1.69897	-1.69897	-1.69897	-1.69897	-1.69897	-1.69897	-1.69897	-1.69897	-1.69897	-1.69897	-1.69897	-1.69897	-1.69897	-1.69897	-1.69897	-5	-1.69897	2.16197	1.93329	-0.69897	-1.82391	-3.30103	-5	-4	-3	-3	-3.30103	-2.69897	-4.30103	-2.09691	-3	5.25	0.25	1.16943	0.101646	0.281039	0.0260384
0.30103	-1.69897	0.477121	2.09968	0.043602	-0.30103	0.209783	-1.69897	-1.69897	-1.69897	-1.69897	-1.69897	-1.69897	-1.69897	-1.69897	-1.69897	-1.69897	-1.69897	-1.69897	-1.69897	-1.69897	-1.69897	-1.69897	-1.69897	-1.69897	-3	-1.69897	2.16197	1.93329	-0.69897	-1.82391	-3.30103	-5	-4	-3	-3	-3.30103	-2.69897	-4.30103	-2.09691	-3	5.25	0.25	1.19212	0.101397	0.255489	0.00832092
0.30103	-1.69897	0.477121	2.09968	0.043602	-0.30103	0.209783	-1.69897	-1.69897	-1.69897	-1.69897	-1.69897	-1.69897	-1.69897	-1.69897	-1.69897	-1.69897	-1.69897	-1.69897	-1.69897	-1.69897	-1.69897	-1.69897	-1.69897	-1.69897	-1	-1.69897	2.16197	1.93329	-0.69897	-1.82391	-3.30103	-5	-4	-3	-3	-3.30103	-2.69897	-4.30103	-2.09691	-3	5.375	0.216506	1.1525	0.064544	0.265656	0.00813581
0.30103	-1.69897	0.477121	2.09968	0.043602	-0.30103	0.209783	-1.69897	-1.69897	-1.69897	-1.69897	-1.69897	-1.69897	-1.69897	-1.69897	-1.69897	-1.69897	-1.69897	-1.69897	-1.69897	-1.69897	-1.69897	-1.69897	-1.69897	-1.69897	0	-1.69897	2.16197	1.93329	-0.69897	-1.82391	-3.30103	-5	-4	-3	-3	-3.30103	-2.69897	-4.30103	-2.09691	-3	5.20833	0.246503	1.20174	0.12282	0.270406	0.00997539
0.30103	-1.69897	0.477121	2.09968	0.043602	-0.30103	0.209783	-1.69897	-1.69897	-1.69897	-1.69897	-1.69897	-1.69897	-1.69897	-1.69897	-1.69897	-1.69897	-1.69897	-1.69897	-1.69897	-1.69897	-1.69897	-1.69897	-1.69897	-1.69897	-2	-4.69897	2.16197	1.93329	-0.69897	-1.82391	-3.30103	-5	-4	-3	-3	-3.30103	-2.69897	-4.30103	-2.09691	-3	5.58333	0.186339	1.22952	0.0915864	0.246736	0.00332257
0.30103	-1.69897	0.477121	2.09968	0.043602	-0.30103	0.209783	-1.69897	-1.69897	-1.69897	-1.69897	-1.69897	-1.69897	-1.69897	-1.69897	-1.69897	-1.69897	-1.69897	-1.69897	-1.69897	-1.69897	-1.69897	-1.69897	-1.69897	-1.69897	-2	-2.69897	2.16197	1.93329	-0.69897	-1.82391	-3.30103	-5	-4	-3	-3	-3.30103	-2.69897	-4.30103	-2.09691	-3	5.45833	0.431003	1.24607	0.0572953	0.249489	0.00332731
0.30103	-1.69897	0.477121	2.09968	0.043602	-0.30103	0.209783	-1.69897	-1.69897	-1.69897	-1.69897	-1.69897	-1.69897	-1.69897	-1.69897	-1.69897	-1.69897	-1.69897	-1.69897	-1.69897	-1.69897	-1.69897	-1.69897	-1.69897	-1.69897	-2	-0.69897	2.16197	1.93329	-0.69897	-1.82391	-3.30103	-5	-4	-3	-3	-3.30103	-2.69897	-4.30103	-2.09691	-3	5.125	0.29756	1.13668	0.0522024	0.143267	0.00661018
0.30103	-1.69897	0.477121	2.09968	0.043602	-0.30103	0.209783	-1.69897	-1.69897	-1.69897	-1.69897	-1.69897	-1.69897	-1.69897	-1.69897	-1.69897	-1.69897	-1.69897	-1.69897	-1.69897	-1.69897	-1.69897	-1.69897	-1.69897	-1.69897	-2	0.30103	2.16197	1.93329	-0.69897	-1.82391	-3.30103	-5	-4	-3	-3	-3.30103	-2.69897	-4.30103	-2.09691	-3	8.75	0.433013	0.769456	0.0625471
0.30103	-1.69897	0.477121	2.09968	0.043602	-0.30103	0.152594	-1.69897	-1.69897	-1.69897	-1.69897	-1.69897	-1.69897	-1.69897	-1.69897	-1.69897	-1.69897	-1.69897	-1.69897	-1.69897	-1.69897	-1.69897	-1.69897	-1.69897	-1.69897	-2	-1.69897	2.16137	1.93329	-0.69897	-1.82391	-3.30103	-5	-4	-3	-3	-3.30103	-2.69897	-4.30103	-2.09691	-3	5.25	0.25	1.14113	0.0789722	0.254367	0.00285112
0.30103	-1.69897	0.477121	2.09968	0.043602	-0.30103	0.158664	-1.69897	-1.69897	-1.69897	-1.69897	-1.69897	-1.69897	-1.69897	-1.69897	-1.69897	-1.69897	-1.69897	-1.69897	-1.69897	-1.69897	-1.69897	-1.69897	-1.69897	-1.69897	-2	-1.69897	2.16143	1.93329	-0.69897	-1.82391	-3.30103	-5	-4	-3	-3	-3.30103	-2.69897	-4.30103	-2.09691	-3	5.41667	0.448764	1.13339	0.0565332	0.254961	0.00640379
0.30103	-1.69897	0.477121	2.09968	0.043602	-0.30103	0.534153	-1.69897	-1.69897	-1.69897	-1.69897	-1.69897	-1.69897	-1.69897	-1.69897	-1.69897	-1.69897	-1.69897	-1.69897	-1.69897	-1.69897	-1.69897	-1.69897	-1.69897	-1.69897	-2	-1.69897	2.16732	1.93329	-0.69897	-1.82391	-3.30103	-5	-4	-3	-3	-3.30103	-2.69897	-4.30103	-2.09691	-3	5.375	0.216506	1.23034	0.081412	0.255948	0.00394754
0.30103	-1.69897	0.477121	2.09968	0.043602	-0.30103	1.33084	-1.69897	-1.69897	-1.69897	-1.69897	-1.69897	-1.69897	-1.69897	-1.69897	-1.69897	-1.69897	-1.69897	-1.69897	-1.69897	-1.69897	-1.69897	-1.69897	-1.69897	-1.69897	-2	-1.69897	2.21748	1.93329	-0.69897	-1.82391	-3.30103	-5	-4	-3	-3	-3.30103	-2.69897	-4.30103	-2.09691	-3	5.41667	0.343592	1.18701	0.0873019	0.263167	0.0134914
0.30103	-1.69897	0.477121	2.09968	0.043602	-0.30103	0.182129	-1.69897	-1.69897	-1.69897	-1.69897	-1.69897	-1.69897	-1.69897	-1.69897	-1.69897	-1.69897	-1.69897	-1.69897	-1.69897	-1.69897	-1.69897	-1.69897	-1.69897	-1.69897	-2	-1.69897	2.16197	1.93279	-0.69897	-1.82391	-3.30103	-5	-4	-3	-3	-3.30103	-2.69897	-4.30103	-2.09691	-3	5.16667	0.235702	1.18226	0.0783979	0.255733	0.00393121
0.30103	-1.69897	0.477121	2.09968	0.043602	-0.30103	0.184975	-1.69897	-1.69897	-1.69897	-1.69897	-1.69897	-1.69897	-1.69897	-1.69897	-1.69897	-1.69897	-1.69897	-1.69897	-1.69897	-1.69897	-1.69897	-1.69897	-1.69897	-1.69897	-2	-1.69897	2.16197	1.93284	-0.69897	-1.82391	-3.30103	-5	-4	-3	-3	-3.30103	-2.69897	-4.30103	-2.09691	-3	5.25	0.381881	1.31892	0.154357	0.253517	0.00504264
0.30103	-1.69897	0.477121	2.09968	0.043602	-0.30103	0.401573	-1.69897	-1.69897	-1.69897	-1.69897	-1.69897	-1.69897	-1.69897	-1.69897	-1.69897	-1.69897	-1.69897	-1.69897	-1.69897	-1.69897	-1.69897	-1.69897	-1.69897	-1.69897	-2	-1.69897	2.16197	1.93783	-0.69897	-1.82391	-3.30103	-5	-4	-3	-3	-3.30103	-2.69897	-4.30103	-2.09691	-3	5.375	0.216506	1.15701	0.0948526	0.2681	0.0083521
0.30103	-1.69897	0.477121	2.09968	0.043602	-0.30103	1.06149	-1.69897	-1.69897	-1.69897	-1.69897	-1.69897	-1.69897	-1.69897	-1.69897	-1.69897	-1.69897	-1.69897	-1.69897	-1.69897	-1.69897	-1.69897	-1.69897	-1.69897	-1.69897	-2	-1.69897	2.16197	1.98074	-0.69897	-1.82391	-3.30103	-5	-4	-3	-3	-3.30103	-2.69897	-4.30103	-2.09691	-3	5.45833	0.379601	1.20288	0.0975001	0.263252	0.00647351
0.30103	-1.69897	0.477121	2.09968	0.00242958	-0.30103	0.209783	-1.69897	-1.69897	-1.69897	-1.69897	-1.69897	-1.69897	-1.69897	-1.69897	-1.69897	-1.69897	-1.69897	-1.69897	-1.69897	-1.69897	-1.69897	-1.69897	-1.69897	-1.69897	-2	-1.69897	2.16197	1.93329	-1	-1.82391	-3.30103	-5	-4	-3	-3	-3.30103	-2.69897	-4.30103	-2.09691	-3	5.5	0.353553	1.1719	0.0751525	0.257239	0.00234702
0.30103	-1.69897	0.477121	2.09968	0.00672697	-0.30103	0.209783	-1.69897	-1.69897	-1.69897	-1.69897	-1.69897	-1.69897	-1.69897	-1.69897	-1.69897	-1.69897	-1.69897	-1.69897	-1.69897	-1.69897	-1.69897	-1.69897	-1.69897	-1.69897	-2	-1.69897	2.16197	1.93329	-0.958607	-1.82391	-3.30103	-5	-4	-3	-3	-3.30103	-2.69897	-4.30103	-2.09691	-3	5.41667	0.343592	1.18512	0.10087	0.257517	0.00481918
0.30103	-1.69897	0.477121	2.09968	0.302246	-0.30103	0.209783	-1.69897	-1.69897	-1.69897	-1.69897	-1.69897	-1.69897	-1.69897	-1.69897	-1.69897	-1.69897	-1.69897	-1.69897	-1.69897	-1.69897	-1.69897	-1.69897	-1.69897	-1.69897	-2	-1.69897	2.16197	1.93329	0.0413927	-1.82391	-3.30103	-5	-4	-3	-3	-3.30103	-2.69897	-4.30103	-2.09691	-3	5.375	0.216506	1.17279	0.0450238	0.2566	0.00225462
0.30103	-1.69897	0.477121	2.09968	1.04161	-0.30103	0.209783	-1.69897	-1.69897	-1.69897	-1.69897	-1.69897	-1.69897	-1.69897	-1.69897	-1.69897	-1.69897	-1.69897	-1.69897	-1.69897	-1.69897	-1.69897	-1.69897	-1.69897	-1.69897	-2	-1.69897	2.16197	1.93329	1.00432	-1.82391	-3.30103	-5	-4	-3	-3	-3.30103	-2.69897	-4.30103	-2.09691	-3	5.33333	0.235702	1.21347	0.0706193	0.246667	0.00317997
0.30103	-1.69897	0.477121	2.09968	0.043602	-0.30103	0.152594	-1.69897	-1.69897	-1.69897	-1.69897	-1.69897	-1.69897	-1.69897	-1.69897	-1.69897	-1.69897	-1.69897	-1.69897	-1.69897	-1.69897	-1.69897	-1.69897	-1.69897	-1.69897	-2	-1.69897	2.16197	1.93329	-1	-1.82391	-3.30103	-5	-4	-3	-3	-3.30103	-2.69897	-4.30103	-2.09691	-3	5.25	0.25	1.28655	0.137197	0.258461	0.00264735
0.30103	-1.69897	0.477121	2.09968	0.043602	-0.30103	0.158664	-1.69897	-1.69897	-1.69897	-1.69897	-1.69897	-1.69897	-1.69897	-1.69897	-1.69897	-1.69897	-1.69897	-1.69897	-1.69897	-1.69897	-1.69897	-1.69897	-1.69897	-1.69897	-2	-1.69897	2.16197	1.93329	-0.958607	-1.82391	-3.30103	-5	-4	-3	-3	-3.30103	-2.69897	-4.30103	-2.09691	-3	5.16667	0.235702	1.25061	0.118641	0.262878	0.0100262
0.30103	-1.69897	0.477121	2.09968	0.043602	-0.30103	0.534153	-1.69897	-1.69897	-1.69897	-1.69897	-1.69897	-1.69897	-1.69897	-1.69897	-1.69897	-1.69897	-1.69897	-1.69897	-1.69897	-1.69897	-1.69897	-1.69897	-1.69897	-1.69897	-2	-1.69897	2.16197	1.93329	0.0413927	-1.82391	-3.30103	-5	-4	-3	-3	-3.30103	-2.69897	-4.30103	-2.09691	-3	5.33333	0.311805	1.24726	0.137147	0.258767	0.00324323
0.30103	-1.69897	0.477121	2.09968	0.043602	-0.30103	1.33084	-1.69897	-1.69897	-1.69897	-1.69897	-1.69897	-1.69897	-1.69897	-1.69897	-1.69897	-1.69897	-1.69897	-1.69897	-1.69897	-1.69897	-1.69897	-1.69897	-1.69897	-1.69897	-2	-1.69897	2.16197	1.93329	1.00432	-1.82391	-3.30103	-5	-4	-3	-3	-3.30103	-2.69897	-4.30103	-2.09691	-3	5.45833	0.379601	1.27559	0.131048	0.253667	0.00511436
0.30103	-1.69897	0.477121	2.09968	0.043602	-0.30103	0.204391	-1.69897	-1.69897	-1.69897	-1.69897	-1.69897	-1.69897	-1.69897	-1.69897	-1.69897	-1.69897	-1.69897	-1.69897	-1.69897	-1.69897	-1.69897	-1.69897	-1.69897	-1.69897	-2	-1.69897	2.16197	1.93329	-0.69897	-2.30103	-3.30103	-5	-4	-3	-3	-3.30103	-2.69897	-4.30103	-2.09691	-3	5	0.213201	1.19671	0.0687136	0.255161	0.00621633
0.30103	-1.69897	0.477121	2.09968	0.043602	-0.30103	0.204934	-1.69897	-1.69897	-1.69897	-1.69897	-1.69897	-1.69897	-1.69897	-1.69897	-1.69897	-1.69897	-1.69897	-1.69897	-1.69897	-1.69897	-1.69897	-1.69897	-1.69897	-1.69897	-2	-1.69897	2.16197	1.93329	-0.69897	-2.22185	-3.30103	-5	-4	-3	-3	-3.30103	-2.69897	-4.30103	-2.09691	-3	5.25	0.322749	1.27996	0.147617	0.262211	0.0111366
0.30103	-1.69897	0.477121	2.09968	0.043602	-0.30103	0.255514	-1.69897	-1.69897	-1.69897	-1.69897	-1.69897	-1.69897	-1.69897	-1.69897	-1.69897	-1.69897	-1.69897	-1.69897	-1.69897	-1.69897	-1.69897	-1.69897	-1.69897	-1.69897	-2	-1.69897	2.16197	1.93329	-0.69897	-0.978811	-3.30103	-5	-4	-3	-3	-3.30103	-2.69897	-4.30103	-2.09691	-3	5.25	0.322749	1.2138	0.0944125	0.259489	0.0115717
0.30103	-1.69897	0.477121	2.09968	0.043602	-0.30103	0.556423	-1.69897	-1.69897	-1.69897	-1.69897	-1.69897	-1.69897	-1.69897	-1.69897	-1.69897	-1.69897	-1.69897	-1.69897	-1.69897	-1.69897	-1.69897	-1.69897	-1.69897	-1.69897	-2	-1.69897	2.16197	1.93329	-0.69897	0.00216606	-3.30103	-5	-4	-3	-3	-3.30103	-2.69897	-4.30103	-2.09691	-3	5.41667	0.533594	1.11503	0.1237	0.256585	0.00620584
0.30103	-1.69897	0.477121	2.09968	0.0416335	-0.30103	0.209783	-1.69897	-1.69897	-1.69897	-1.69897	-1.69897	-1.69897	-1.69897	-1.69897	-1.69897	-1.69897	-1.69897	-1.69897	-1.69897	-1.69897	-1.69897	-1.69897	-1.69897	-1.69897	-2	-1.69897	2.16197	1.93329	-0.69897	-2	-3.30103	-5	-4	-3	-3	-3.30103	-2.69897	-4.30103	-2.09691	-3	5.33333	0.311805	1.20732	0.0895521	0.262072	0.00546616
0.30103	-1.69897	0.477121	2.09968	0.0418307	-0.30103	0.209783	-1.69897	-1.69897	-1.69897	-1.69897	-1.69897	-1.69897	-1.69897	-1.69897	-1.69897	-1.69897	-1.69897	-1.69897	-1.69897	-1.69897	-1.69897	-1.69897	-1.69897	-1.69897	-2	-1.69897	2.16197	1.93329	-0.69897	-1.97881	-3.30103	-5	-4	-3	-3	-3.30103	-2.69897	-4.30103	-2.09691	-3	5.16667	0.424918	1.31722	0.189839	0.264544	0.00598352
0.30103	-1.69897	0.477121	2.09968	0.0609281	-0.30103	0.209783	-1.69897	-1.69897	-1.69897	-1.69897	-1.69897	-1.69897	-1.69897	-1.69897	-1.69897	-1.69897	-1.69897	-1.69897	-1.69897	-1.69897	-1.69897	-1.69897	-1.69897	-1.69897	-2	-1.69897	2.16197	1.93329	-0.69897	-1.22185	-3.30103	-5	-4	-3	-3	-3.30103	-2.69897	-4.30103	-2.09691	-3	5.25	0.322749	1.21423	0.0862147	0.265878	0.00879113
0.30103	-1.69897	0.477121	2.09968	0.204286	-0.30103	0.209783	-1.69897	-1.69897	-1.69897	-1.69897	-1.69897	-1.69897	-1.69897	-1.69897	-1.69897	-1.69897	-1.69897	-1.69897	-1.69897	-1.69897	-1.69897	-1.69897	-1.69897	-1.69897	-2	-1.69897	2.16197	1.93329	-0.69897	-0.29243	-3.30103	-5	-4	-3	-3	-3.30103	-2.69897	-4.30103	-2.09691	-3	5.16667	0.235702	1.26511	0.0735173	0.2636	0.00626941
0.30103	-1.69897	0.477121	2.09968	0.043602	-3.30103	0.209783	-1.69897	-1.69897	-1.69897	-1.69897	-1.69897	-1.69897	-1.69897	-1.69897	-1.69897	-1.69897	-1.69897	-1.69897	-1.69897	-1.69897	-1.69897	-1.69897	-1.69897	-1.69897	-2	-1.69897	2.16197	1.9282	-0.69897	-1.82391	-3.30103	-5	-4	-3	-3	-3.30103	-2.69897	-4.30103	-2.09691	-3	5	0	1.22045	0.195497	0.257183	0.00316264
0.30103	-1.69897	0.477121	2.09968	0.043602	-1.30103	0.209783	-1.69897	-1.69897	-1.69897	-1.69897	-1.69897	-1.69897	-1.69897	-1.69897	-1.69897	-1.69897	-1.69897	-1.69897	-1.69897	-1.69897	-1.69897	-1.69897	-1.69897	-1.69897	-2	-1.69897	2.16197	1.92871	-0.69897	-1.82391	-3.30103	-5	-4	-3	-3	-3.30103	-2.69897	-4.30103	-2.09691	-3	5.16667	0.235702	1.31005	0.0636944	0.261239	0.0034385
0.30103	-1.69897	0.477121	2.09968	0.043602	0.69897	0.209783	-1.69897	-1.69897	-1.69897	-1.69897	-1.69897	-1.69897	-1.69897	-1.69897	-1.69897	-1.69897	-1.69897	-1.69897	-1.69897	-1.69897	-1.69897	-1.69897	-1.69897	-1.69897	-2	-1.69897	2.16197	1.97663	-0.69897	-1.82391	-3.30103	-5	-4	-3	-3	-3.30103	-2.69897	-4.30103	-2.09691	-3	5.08333	0.399653	1.17736	0.0904151	0.26303	0.0100115
0.30103	-1.69897	0.477121	2.09968	0.043602	1.69897	0.209783	-1.69897	-1.69897	-1.69897	-1.69897	-1.69897	-1.69897	-1.69897	-1.69897	-1.69897	-1.69897	-1.69897	-1.69897	-1.69897	-1.69897	-1.69897	-1.69897	-1.69897	-1.69897	-2	-1.69897	2.16197	2.26661	-0.69897	-1.82391	-3.30103	-5	-4	-3	-3	-3.30103	-2.69897	-4.30103	-2.09691	-3	5.58333	0.343592	0.918201	0.0621486	0.2543	0.00644498
0.30103	-1.69897	0.477121	2.09968	0.0434055	-0.30103	0.209783	-1.69897	-1.69897	-1.69897	-1.69897	-1.69897	-1.69897	-1.69897	-1.69897	-1.69897	-1.69897	-1.69897	-1.69897	-1.69897	-1.69897	-1.69897	-1.69897	-1.69897	-1.69897	-2	-1.69897	2.16197	1.93329	-0.69897	-1.82391	-6.30103	-5	-4	-3	-3	-3.30103	-2.69897	-4.30103	-2.09691	-3	5.16667	0.372678	1.24294	0.0741123	0.229533	0.00465725
0.30103	-1.69897	0.477121	2.09968	0.0434252	-0.30103	0.209783	-1.69897	-1.69897	-1.69897	-1.69897	-1.69897	-1.69897	-1.69897	-1.69897	-1.69897	-1.69897	-1.69897	-1.69897	-1.69897	-1.69897	-1.69897	-1.69897	-1.69897	-1.69897	-2	-1.69897	2.16197	1.93329	-0.69897	-1.82391	-4.30103	-5	-4	-3	-3	-3.30103	-2.69897	-4.30103	-2.09691	-3	4.95833	0.246503	1.19036	0.0747083	0.246918	0.00365802
0.30103	-1.69897	0.477121	2.09968	0.045366	-0.30103	0.209783	-1.69897	-1.69897	-1.69897	-1.69897	-1.69897	-1.69897	-1.69897	-1.69897	-1.69897	-1.69897	-1.69897	-1.69897	-1.69897	-1.69897	-1.69897	-1.69897	-1.69897	-1.69897	-2	-1.69897	2.16197	1.93329	-0.69897	-1.82391	-2.30103	-5	-4	-3	-3	-3.30103	-2.69897	-4.30103	-2.09691	-3	5.08333	0.186339	1.25011	0.135817	0.266706	0.00475632
0.30103	-1.69897	0.477121	2.09968	0.0626233	-0.30103	0.209783	-1.69897	-1.69897	-1.69897	-1.69897	-1.69897	-1.69897	-1.69897	-1.69897	-1.69897	-1.69897	-1.69897	-1.69897	-1.69897	-1.69897	-1.69897	-1.69897	-1.69897	-1.69897	-2	-1.69897	2.16197	1.93329	-0.69897	-1.82391	-1.30103	-5	-4	-3	-3	-3.30103	-2.69897	-4.30103	-2.09691	-3	5.375	0.462106	1.25857	0.0965476	0.265572	0.00367287
0.30103	-4.69897	0.477121	2.09968	0.043602	-0.30103	0.209783	-1.69897	-1.69897	-1.69897	-1.69897	-1.69897	-1.69897	-1.69897	-1.69897	-1.69897	-1.69897	-1.69897	-1.69897	-1.69897	-1.69897	-1.69897	-1.69897	-1.69897	-1.69897	-2	-1.69897	2.16197	1.93299	-0.69897	-1.82391	-3.30103	-5	-4	-3	-3	-3.30103	-2.69897	-4.30103	-2.09691	-3	5.29167	0.246503	1.16733	0.0827373	0.257282	0.00498354
0.30103	-2.69897	0.477121	2.09968	0.043602	-0.30103	0.209783	-1.69897	-1.69897	-1.69897	-1.69897	-1.69897	-1.69897	-1.69897	-1.69897	-1.69897	-1.69897	-1.69897	-1.69897	-1.69897	-1.69897	-1.69897	-1.69897	-1.69897	-1.69897	-2	-1.69897	2.16197	1.93302	-0.69897	-1.82391	-3.30103	-5	-4	-3	-3	-3.30103	-2.69897	-4.30103	-2.09691	-3	5.20833	0.320048	1.1589	0.0311002	0.25113	0.00384144
0.30103	-0.69897	0.477121	2.09968	0.043602	-0.30103	0.209783	-1.69897	-1.69897	-1.69897	-1.69897	-1.69897	-1.69897	-1.69897	-1.69897	-1.69897	-1.69897	-1.69897	-1.69897	-1.69897	-1.69897	-1.69897	-1.69897	-1.69897	-1.69897	-2	-1.69897	2.16197	1.93602	-0.69897	-1.82391	-3.30103	-5	-4	-3	-3	-3.30103	-2.69897	-4.30103	-2.09691	-3	5.375	0.29756	1.20201	0.0723701	0.252989	0.00324132
0.30103	0.30103	0.477121	2.09968	0.043602	-0.30103	0.209783	-1.69897	-1.69897	-1.69897	-1.69897	-1.69897	-1.69897	-1.69897	-1.69897	-1.69897	-1.69897	-1.69897	-1.69897	-1.69897	-1.69897	-1.69897	-1.69897	-1.69897	-1.69897	-2	-1.69897	2.16197	1.96238	-0.69897	-1.82391	-3.30103	-5	-4	-3	-3	-3.30103	-2.69897	-4.30103	-2.09691	-3	5.33333	0.372678	1.24398	0.122556	0.269797	0.00616843
0.30103	-1.69897	0.477121	2.09968	0.043598	-0.30103	0.209783	-1.69897	-1.69897	-1.69897	-1.69897	-1.69897	-1.69897	-1.69897	-1.69897	-1.69897	-1.69897	-1.69897	-1.69897	-1.69897	-1.69897	-1.69897	-1.69897	-1.69897	-1.69897	-2	-1.69897	2.16197	1.93329	-0.69897	-1.82391	-3.30103	-8	-4	-3	-3	-3.30103	-2.69897	-4.30103	-2.09691	-3	5.29167	0.246503	1.19834	0.0920789	0.256628	0.00442522
0.30103	-1.69897	0.477121	2.09968	0.0435984	-0.30103	0.209783	-1.69897	-1.69897	-1.69897	-1.69897	-1.69897	-1.69897	-1.69897	-1.69897	-1.69897	-1.69897	-1.69897	-1.69897	-1.69897	-1.69897	-1.69897	-1.69897	-1.69897	-1.69897	-2	-1.69897	2.16197	1.93329	-0.69897	-1.82391	-3.30103	-6	-4	-3	-3	-3.30103	-2.69897	-4.30103	-2.09691	-3	5.08333	0.343592	1.27	0.0647031	0.257239	0.00371049
0.30103	-1.69897	0.477121	2.09968	0.0436373	-0.30103	0.209783	-1.69897	-1.69897	-1.69897	-1.69897	-1.69897	-1.69897	-1.69897	-1.69897	-1.69897	-1.69897	-1.69897	-1.69897	-1.69897	-1.69897	-1.69897	-1.69897	-1.69897	-1.69897	-2	-1.69897	2.16197	1.93329	-0.69897	-1.82391	-3.30103	-4	-4	-3	-3	-3.30103	-2.69897	-4.30103	-2.09691	-3	5.25	0.25	1.25683	0.127759	0.260286	0.00575692
0.30103	-1.69897	0.477121	2.09968	0.0439907	-0.30103	0.209783	-1.69897	-1.69897	-1.69897	-1.69897	-1.69897	-1.69897	-1.69897	-1.69897	-1.69897	-1.69897	-1.69897	-1.69897	-1.69897	-1.69897	-1.69897	-1.69897	-1.69897	-1.69897	-2	-1.69897	2.16197	1.93329	-0.69897	-1.82391	-3.30103	-3	-4	-3	-3	-3.30103	-2.69897	-4.30103	-2.09691	-3	5.25	0.322749	1.30658	0.114478	0.261239	0.00703228
0.30103	-1.69897	0.477121	2.09968	0.043602	-0.30103	0.209783	-1.69897	-1.69897	-1.69897	-1.69897	-1.69897	-1.69897	-1.69897	-1.69897	-1.69897	-1.69897	-1.69897	-1.69897	-1.69897	-1.69897	-1.69897	-1.69897	-1.69897	-1.69897	-2	-1.69897	2.16197	1.93328	-0.69897	-1.82391	-3.30103	-5	-4	-6	-3	-3.30103	-2.69897	-4.30103	-2.09691	-3	5.33333	0.235702	1.13136	0.0422119	0.258961	0.00777277
0.30103	-1.69897	0.477121	2.09968	0.043602	-0.30103	0.209783	-1.69897	-1.69897	-1.69897	-1.69897	-1.69897	-1.69897	-1.69897	-1.69897	-1.69897	-1.69897	-1.69897	-1.69897	-1.69897	-1.69897	-1.69897	-1.69897	-1.69897	-1.69897	-2	-1.69897	2.16197	1.93329	-0.69897	-1.82391	-3.30103	-5	-4	-4	-3	-3.30103	-2.69897	-4.30103	-2.09691	-3	5.45833	0.320048	1.19166	0.106088	0.2611	0.00601541
0.30103	-1.69897	0.477121	2.09968	0.043602	-0.30103	0.209783	-1.69897	-1.69897	-1.69897	-1.69897	-1.69897	-1.69897	-1.69897	-1.69897	-1.69897	-1.69897	-1.69897	-1.69897	-1.69897	-1.69897	-1.69897	-1.69897	-1.69897	-1.69897	-2	-1.69897	2.16197	1.93339	-0.69897	-1.82391	-3.30103	-5	-4	-2	-3	-3.30103	-2.69897	-4.30103	-2.09691	-3	5.375	0.216506	1.18808	0.0638428	0.2621	0.00258915
0.30103	-1.69897	0.477121	2.09968	0.043602	-0.30103	0.209783	-1.69897	-1.69897	-1.69897	-1.69897	-1.69897	-1.69897	-1.69897	-1.69897	-1.69897	-1.69897	-1.69897	-1.69897	-1.69897	-1.69897	-1.69897	-1.69897	-1.69897	-1.69897	-2	-1.69897	2.16197	1.9343	-0.69897	-1.82391	-3.30103	-5	-4	-1	-3	-3.30103	-2.69897	-4.30103	-2.09691	-3	5.5	0.288675	1.20173	0.0796002	0.268406	0.0123517
0.30103	-1.69897	0.477121	2.09968	0.0435627	-0.30103	0.209783	-1.69897	-1.69897	-1.69897	-1.69897	-1.69897	-1.69897	-1.69897	-1.69897	-1.69897	-1.69897	-1.69897	-1.69897	-1.69897	-1.69897	-1.69897	-1.69897	-1.69897	-1.69897	-2	-1.69897	2.16197	1.93329	-0.69897	-1.82391	-3.30103	-5	-7	-3	-3	-3.30103	-2.69897	-4.30103	-2.09691	-3	5.375	0.216506	1.16216	0.0454436	0.256161	0.00282778
0.30103	-1.69897	0.477121	2.09968	0.0435666	-0.30103	0.209783	-1.69897	-1.69897	-1.69897	-1.69897	-1.69897	-1.69897	-1.69897	-1.69897	-1.69897	-1.69897	-1.69897	-1.69897	-1.69897	-1.69897	-1.69897	-1.69897	-1.69897	-1.69897	-2	-1.69897	2.16197	1.93329	-0.69897	-1.82391	-3.30103	-5	-5	-3	-3	-3.30103	-2.69897	-4.30103	-2.09691	-3	5.45833	0.246503	1.17667	0.108932	0.259711	0.00662743
0.30103	-1.69897	0.477121	2.09968	0.0439553	-0.30103	0.209783	-1.69897	-1.69897	-1.69897	-1.69897	-1.69897	-1.69897	-1.69897	-1.69897	-1.69897	-1.69897	-1.69897	-1.69897	-1.69897	-1.69897	-1.69897	-1.69897	-1.69897	-1.69897	-2	-1.69897	2.16197	1.93329	-0.69897	-1.82391	-3.30103	-5	-3	-3	-3	-3.30103	-2.69897	-4.30103	-2.09691	-3	5.41667	0.186339	1.16828	0.0495257	0.2683	0.00711056
0.30103	-1.69897	0.477121	2.09968	0.0474735	-0.30103	0.209783	-1.69897	-1.69897	-1.69897	-1.69897	-1.69897	-1.69897	-1.69897	-1.69897	-1.69897	-1.69897	-1.69897	-1.69897	-1.69897	-1.69897	-1.69897	-1.69897	-1.69897	-1.69897	-2	-1.69897	2.16197	1.93329	-0.69897	-1.82391	-3.30103	-5	-2	-3	-3	-3.30103	-2.69897	-4.30103	-2.09691	-3	5.20833	0.246503	1.21948	0.105904	0.3011	0
0.30103	-1.69897	0.477121	2.09968	0.043602	-0.30103	0.209515	-1.69897	-1.69897	-1.69897	-1.69897	-1.69897	-1.69897	-1.69897	-1.69897	-1.69897	-1.69897	-1.69897	-1.69897	-1.69897	-1.69897	-1.69897	-1.69897	-1.69897	-1.69897	-2	-1.69897	2.16197	1.93329	-0.69897	-1.82391	-3.30103	-5	-4	-3	-6	-3.30103	-2.69897	-4.30103	-2.09691	-3	5.54167	0.320048	1.15894	0.0609211	0.259464	0.00332561
0.30103	-1.69897	0.477121	2.09968	0.043602	-0.30103	0.209542	-1.69897	-1.69897	-1.69897	-1.69897	-1.69897	-1.69897	-1.69897	-1.69897	-1.69897	-1.69897	-1.69897	-1.69897	-1.69897	-1.69897	-1.69897	-1.69897	-1.69897	-1.69897	-2	-1.69897	2.16197	1.93329	-0.69897	-1.82391	-3.30103	-5	-4	-3	-4	-3.30103	-2.69897	-4.30103	-2.09691	-3	5.5	0.353553	1.18009	0.0973213	0.281044	0.0358197
0.30103	-1.69897	0.477121	2.09968	0.043602	-0.30103	0.212188	-1.69897	-1.69897	-1.69897	-1.69897	-1.69897	-1.69897	-1.69897	-1.69897	-1.69897	-1.69897	-1.69897	-1.69897	-1.69897	-1.69897	-1.69897	-1.69897	-1.69897	-1.69897	-2	-1.69897	2.16197	1.93329	-0.69897	-1.82391	-3.30103	-5	-4	-3	-2	-3.30103	-2.69897	-4.30103	-2.09691	-3	5.33333	0.235702	1.15161	0.0657463	0.266044	0.0087769
0.30103	-1.69897	0.477121	2.09968	0.043602	-0.30103	0.235528	-1.69897	-1.69897	-1.69897	-1.69897	-1.69897	-1.69897	-1.69897	-1.69897	-1.69897	-1.69897	-1.69897	-1.69897	-1.69897	-1.69897	-1.69897	-1.69897	-1.69897	-1.69897	-2	-1.69897	2.16197	1.93329	-0.69897	-1.82391	-3.30103	-5	-4	-3	-1	-3.30103	-2.69897	-4.30103	-2.09691	-3	5.375	0.29756	1.1852	0.077727	0.267656	0.00793764
0.30103	-1.69897	0.477121	2.09968	0.043602	-0.30103	0.209783	-1.69897	-1.69897	-1.69897	-1.69897	-1.69897	-1.69897	-1.69897	-1.69897	-1.69897	-1.69897	-1.69897	-1.69897	-1.69897	-1.69897	-1.69897	-1.69897	-1.69897	-1.69897	-2	-1.69897	2.16197	1.93329	-0.69897	-1.82391	-3.30103	-5	-4	-3	-3	-3.30103	-5.69897	-4.30103	-2.09691	-3	5.33333	0.311805	1.20099	0.143337	0.257267	0.00511624
0.30103	-1.69897	0.477121	2.09968	0.043602	-0.30103	0.209783	-1.69897	-1.69897	-1.69897	-1.69897	-1.69897	-1.69897	-1.69897	-1.69897	-1.69897	-1.69897	-1.69897	-1.69897	-1.69897	-1.69897	-1.69897	-1.69897	-1.69897	-1.69897	-2	-1.69897	2.16197	1.93329	-0.69897	-1.82391	-3.30103	-5	-4	-3	-3	-3.30103	-3.69897	-4.30103	-2.09691	-3	5.29167	0.246503	1.23514	0.148866	0.267572	0.0144392
0.30103	-1.69897	0.477121	2.09968	0.043602	-0.30103	0.209783	-1.69897	-1.69897	-1.69897	-1.69897	-1.69897	-1.69897	-1.69897	-1.69897	-1.69897	-1.69897	-1.69897	-1.69897	-1.69897	-1.69897	-1.69897	-1.69897	-1.69897	-1.69897	-2	-1.69897	2.16197	1.93329	-0.69897	-1.82391	-3.30103	-5	-4	-3	-3	-3.30103	-1.69897	-4.30103	-2.09691	-3	5.375	0.29756	1.15247	0.0821472	0.264906	0.0064542
0.30103	-1.69897	0.477121	2.09968	0.043602	-0.30103	0.209783	-1.69897	-1.69897	-1.69897	-1.69897	-1.69897	-1.69897	-1.69897	-1.69897	-1.69897	-1.69897	-1.69897	-1.69897	-1.69897	-1.69897	-1.69897	-1.69897	-1.69897	-1.69897	-2	-1.69897	2.16197	1.93329	-0.69897	-1.82391	-3.30103	-5	-4	-3	-3	-3.30103	-0.69897	-4.30103	-2.09691	-3	5.29167	0.246503	1.18229	0.0467553	0.272312	0.00569116
0.30103	-1.69897	0.477121	2.09968	0.043602	-0.30103	0.209783	-1.69897	-1.69897	-1.69897	-1.69897	-1.69897	-1.69897	-1.69897	-1.69897	-1.69897	-1.69897	-1.69897	-1.69897	-1.69897	-1.69897	-1.69897	-1.69897	-1.69897	-1.69897	-2	-1.69897	2.16197	1.93329	-0.69897	-1.82391	-3.30103	-5	-4	-3	-3	-3.30103	-2.69897	-7.30103	-2.09691	-3	5.41667	0.276385	1.14801	0.075716	0.2641	0.00654755
0.30103	-1.69897	0.477121	2.09968	0.043602	-0.30103	0.209783	-1.69897	-1.69897	-1.69897	-1.69897	-1.69897	-1.69897	-1.69897	-1.69897	-1.69897	-1.69897	-1.69897	-1.69897	-1.69897	-1.69897	-1.69897	-1.69897	-1.69897	-1.69897	-2	-1.69897	2.16197	1.93329	-0.69897	-1.82391	-3.30103	-5	-4	-3	-3	-3.30103	-2.69897	-5.30103	-2.09691	-3	5.25	0.25	1.23128	0.128061	0.258239	0.00504142
0.30103	-1.69897	0.477121	2.09968	0.043602	-0.30103	0.209783	-1.69897	-1.69897	-1.69897	-1.69897	-1.69897	-1.69897	-1.69897	-1.69897	-1.69897	-1.69897	-1.69897	-1.69897	-1.69897	-1.69897	-1.69897	-1.69897	-1.69897	-1.69897	-2	-1.69897	2.16197	1.93329	-0.69897	-1.82391	-3.30103	-5	-4	-3	-3	-3.30103	-2.69897	-3.30103	-2.09691	-3	5.25	0.25	1.19973	0.0995577	0.256906	0.00465367
0.30103	-1.69897	0.477121	2.09968	0.043602	-0.30103	0.209783	-1.69897	-1.69897	-1.69897	-1.69897	-1.69897	-1.69897	-1.69897	-1.69897	-1.69897	-1.69897	-1.69897	-1.69897	-1.69897	-1.69897	-1.69897	-1.69897	-1.69897	-1.69897	-2	-1.69897	2.16197	1.93329	-0.69897	-1.82391	-3.30103	-5	-4	-3	-3	-3.30103	-2.69897	-2.30103	-2.09691	-3	5.25	0.322749	1.18784	0.0884128	0.263906	0.0108862
0.30103	-1.69897	0.477121	2.09968	0.043602	-0.30103	0.209783	-1.69897	-1.69897	-1.69897	-1.69897	-1.69897	-1.69897	-1.69897	-1.69897	-1.69897	-1.69897	-1.69897	-1.69897	-1.69897	-1.69897	-1.69897	-1.69897	-1.69897	-1.69897	-2	-1.69897	2.16197	1.93329	-0.69897	-1.82391	-3.30103	-5	-4	-3	-3	-6.30103	-2.69897	-4.30103	-2.09691	-3	5.29167	0.246503	1.25061	0.147434	0.260183	0.00325498
0.30103	-1.69897	0.477121	2.09968	0.043602	-0.30103	0.209783	-1.69897	-1.69897	-1.69897	-1.69897	-1.69897	-1.69897	-1.69897	-1.69897	-1.69897	-1.69897	-1.69897	-1.69897	-1.69897	-1.69897	-1.69897	-1.69897	-1.69897	-1.69897	-2	-1.69897	2.16197	1.93329	-0.69897	-1.82391	-3.30103	-5	-4	-3	-3	-4.30103	-2.69897	-4.30103	-2.09691	-3	5.08333	0.276385	1.21055	0.106127	0.2626	0.0124495
0.30103	-1.69897	0.477121	2.09968	0.043602	-0.30103	0.209783	-1.69897	-1.69897	-1.69897	-1.69897	-1.69897	-1.69897	-1.69897	-1.69897	-1.69897	-1.69897	-1.69897	-1.69897	-1.69897	-1.69897	-1.69897	-1.69897	-1.69897	-1.69897	-2	-1.69897	2.16197	1.93329	-0.69897	-1.82391	-3.30103	-5	-4	-3	-3	-2.30103	-2.69897	-4.30103	-2.09691	-3	5.20833	0.246503	1.25467	0.143582	0.257464	0.00458027
0.30103	-1.69897	0.477121	2.09968	0.043602	-0.30103	0.209783	-1.69897	-1.69897	-1.69897	-1.69897	-1.69897	-1.69897	-1.69897	-1.69897	-1.69897	-1.69897	-1.69897	-1.69897	-1.69897	-1.69897	-1.69897	-1.69897	-1.69897	-1.69897	-2	-1.69897	2.16197	1.93329	-0.69897	-1.82391	-3.30103	-5	-4	-3	-3	-1.30103	-2.69897	-4.30103	-2.09691	-3	5.16667	0.235702	1.26862	0.137052	0.264767	0.00682723
0.30103	-1.69897	0.477121	2.09968	0.043602	-0.30103	0.209783	-1.69897	-1.69897	-1.69897	-1.69897	-1.69897	-1.69897	-1.69897	-1.69897	-1.69897	-1.69897	-1.69897	-1.69897	-1.69897	-1.69897	-1.69897	-1.69897	-1.69897	-1.69897	-2	-1.69897	2.16197	1.93329	-0.69897	-1.82391	-3.30103	-5	-4	-3	-3	-3.30103	-2.69897	-4.30103	-5.09691	-3	5.41667	0.186339	1.17868	0.0852072	0.261878	0.0073916
0.30103	-1.69897	0.477121	2.09968	0.043602	-0.30103	0.209783	-1.69897	-1.69897	-1.69897	-1.69897	-1.69897	-1.69897	-1.69897	-1.69897	-1.69897	-1.69897	-1.69897	-1.69897	-1.69897	-1.69897	-1.69897	-1.69897	-1.69897	-1.69897	-2	-1.69897	2.16197	1.93329	-0.69897	-1.82391	-3.30103	-5	-4	-3	-3	-3.30103	-2.69897	-4.30103	-3.09691	-3	5.41667	0.186339	1.24376	0.138352	0.262592	0.0078164
0.30103	-1.69897	0.477121	2.09968	0.043602	-0.30103	0.209783	-1.69897	-1.69897	-1.69897	-1.69897	-1.69897	-1.69897	-1.69897	-1.69897	-1.69897	-1.69897	-1.69897	-1.69897	-1.69897	-1.69897	-1.69897	-1.69897	-1.69897	-1.69897	-2	-1.69897	2.16197	1.93329	-0.69897	-1.82391	-3.30103	-5	-4	-3	-3	-3.30103	-2.69897	-4.30103	-1.09691	-3	5.5	0	1.18927	0.0574211	0.264406	0.00617561
0.30103	-1.69897	0.477121	2.09968	0.043602	-0.30103	0.209783	-1.69897	-1.69897	-1.69897	-1.69897	-1.69897	-1.69897	-1.69897	-1.69897	-1.69897	-1.69897	-1.69897	-1.69897	-1.69897	-1.69897	-1.69897	-1.69897	-1.69897	-1.69897	-2	-1.69897	2.16197	1.93329	-0.69897	-1.82391	-3.30103	-5	-4	-3	-3	-3.30103	-2.69897	-4.30103	-0.09691	-3	5.58333	0.276385	1.19955	0.0802366	0.263858	0.00872022
0.30103	-1.69897	0.477121	2.09968	0.043602	-0.30103	0.209783	-1.69897	-1.69897	-1.69897	-1.69897	-1.69897	-1.69897	-1.69897	-1.69897	-1.69897	-1.69897	-1.69897	-1.69897	-1.69897	-1.69897	-1.69897	-1.69897	-1.69897	-1.69897	-2	-1.69897	2.16197	1.93329	-0.69897	-1.82391	-3.30103	-5	-4	-3	-3	-3.30103	-2.69897	-4.30103	-2.09691	-6	5.375	0.216506	1.21999	0.0546575	0.259794	0.0072386
0.30103	-1.69897	0.477121	2.09968	0.043602	-0.30103	0.209783	-1.69897	-1.69897	-1.69897	-1.69897	-1.69897	-1.69897	-1.69897	-1.69897	-1.69897	-1.69897	-1.69897	-1.69897	-1.69897	-1.69897	-1.69897	-1.69897	-1.69897	-1.69897	-2	-1.69897	2.16197	1.93329	-0.69897	-1.82391	-3.30103	-5	-4	-3	-3	-3.30103	-2.69897	-4.30103	-2.09691	-4	5.20833	0.246503	1.20815	0.0706968	0.261517	0.00896405
0.30103	-1.69897	0.477121	2.09968	0.043602	-0.30103	0.209783	-1.69897	-1.69897	-1.69897	-1.69897	-1.69897	-1.69897	-1.69897	-1.69897	-1.69897	-1.69897	-1.69897	-1.69897	-1.69897	-1.69897	-1.69897	-1.69897	-1.69897	-1.69897	-2	-1.69897	2.16197	1.93329	-0.69897	-1.82391	-3.30103	-5	-4	-3	-3	-3.30103	-2.69897	-4.30103	-2.09691	-2	5.29167	0.246503	1.15261	0.04121	0.277009	0.00746722
0.30103	-1.69897	0.477121	2.09968	0.043602	-0.30103	0.209783	-1.69897	-1.69897	-1.69897	-1.69897	-1.69897	-1.69897	-1.69897	-1.69897	-1.69897	-1.69897	-1.69897	-1.69897	-1.69897	-1.69897	-1.69897	-1.69897	-1.69897	-1.69897	-2	-1.69897	2.16197	1.93329	-0.69897	-1.82391	-3.30103	-5	-4	-3	-3	-3.30103	-2.69897	-4.30103	-2.09691	-1	5.29167	0.246503	1.22977	0.0898664	0.266628	0.00463972
-0.657577	-1.69897	2.30103	1.98074	2.04336	-1.30103	0.638689	-2.69897	-1.69897	0.30103	0.30103	-1.69897	-4.69897	-1.69897	-0.69897	0.30103	-1.69897	-0.69897	-2.69897	-1.69897	0.30103	-4.69897	-0.69897	-1.69897	-0.69897	-2	-4.69897	1.11803	2.22884	1	-0.221849	-6.30103	-6	-7	-4	-1	-6.30103	-2.69897	-3.30103	-0.09691	-6	0	0	0	0	0	0
-0.657577	-1.69897	2.30103	2.10158	2.04336	-1.30103	0.638689	-2.69897	-1.69897	0.30103	0.30103	-1.69897	-4.69897	-1.69897	-0.69897	0.30103	-1.69897	-0.69897	-2.69897	-1.69897	0.30103	-4.69897	-0.69897	-1.69897	-0.69897	-2	-4.69897	1.87216	2.22884	1	-0.221849	-6.30103	-6	-7	-4	-1	-6.30103	-2.69897	-3.30103	-0.09691	-6	6.89333	0.398871	0.628032	0.0274662	0.124603	0.00752512
-0.657577	-1.69897	2.30103	2.19618	2.04336	-1.30103	0.638689	-2.69897	-1.69897	0.30103	0.30103	-1.69897	-4.69897	-1.69897	-0.69897	0.30103	-1.69897	-0.69897	-2.69897	-1.69897	0.30103	-4.69897	-0.69897	-1.69897	-0.69897	-2	-4.69897	2.13354	2.22884	1	-0.221849	-6.30103	-6	-7	-4	-1	-6.30103	-2.69897	-3.30103	-0.09691	-6	6.95833	0.246503	0.622646	0.0312323	0.127878	0.0020518
-0.657577	-1.69897	2.30103	2.27381	2.04336	-1.30103	0.638689	-2.69897	-1.69897	0.30103	0.30103	-1.69897	-4.69897	-1.69897	-0.69897	0.30103	-1.69897	-0.69897	-2.69897	-1.69897	0.30103	-4.69897	-0.69897	-1.69897	-0.69897	-2	-4.69897	2.29557	2.22884	1	-0.221849	-6.30103	-6	-7	-4	-1	-6.30103	-2.69897	-3.30103	-0.09691	-6	7.79167	0.379601	0.59481	0.0463341	0.130645	0.0043907
-0.657577	-1.69897	2.30103	2.33965	2.04336	-1.30103	0.638689	-2.69897	-1.69897	0.30103	0.30103	-1.69897	-4.69897	-1.69897	-0.69897	0.30103	-1.69897	-0.69897	-2.69897	-1.69897	0.30103	-4.69897	-0.69897	-1.69897	-0.69897	-2	-4.69897	2.4133	2.22884	1	-0.221849	-6.30103	-6	-7	-4	-1	-6.30103	-2.69897	-3.30103	-0.09691	-6	8.45833	0.246503	0.623914	0.0768523	0.125989	0.0133945
-0.657577	-1.69897	2.30103	2.06216	2.04336	-1.30103	0.638689	-2.69897	-1.69897	0.30103	0.30103	-1.69897	-4.69897	-1.69897	-0.69897	0.30103	-1.69897	-0.69897	-2.69897	-1.69897	0.30103	-4.69897	-0.69897	-1.69897	-0.69897	-2	-4.69897	1.80304	2.22884	1	-0.221849	-6.30103	-6	-7	-4	-1	-6.30103	-2.69897	-3.30103	-0.09691	-6	6.79167	0.320048	0.646244	0.0195412	0.12835	0.00300655
-0.657577	-1.69897	2.30103	2.13783	2.04336	-1.30103	0.638689	-2.69897	-1.69897	0.30103	0.30103	-1.69897	-4.69897	-1.69897	-0.69897	0.30103	-1.69897	-0.69897	-2.69897	-1.69897	0.30103	-4.69897	-0.69897	-1.69897	-0.69897	-2	-4.69897	1.93197	2.22884	1	-0.221849	-6.30103	-6	-7	-4	-1	-6.30103	-2.69897	-3.30103	-0.09691	-6	7.20833	0.379601	0.609343	0.0154212	0.123464	0.00293861
-0.657577	-1.69897	2.30103	2.1871	2.04336	-1.30103	0.638689	-2.69897	-1.69897	0.30103	0.30103	-1.69897	-4.69897	-1.69897	-0.69897	0.30103	-1.69897	-0.69897	-2.69897	-1.69897	0.30103	-4.69897	-0.69897	-1.69897	-0.69897	-2	-4.69897	2.0086	2.22884	1	-0.221849	-6.30103	-6	-7	-4	-1	-6.30103	-2.69897	-3.30103	-0.09691	-6	7.70833	0.320048	0.597679	0.0224031	0.123739	0.00122821
-0.657577	-1.69897	2.30103	2.28409	2.04336	-1.30103	0.638689	-2.69897	-1.69897	0.30103	0.30103	-1.69897	-4.69897	-1.69897	-0.69897	0.30103	-1.69897	-0.69897	-2.69897	-1.69897	0.30103	-4.69897	-0.69897	-1.69897	-0.69897	-2	-4.69897	2.14768	2.22884	1	-0.221849	-6.30103	-6	-7	-4	-1	-6.30103	-2.69897	-3.30103	-0.09691	-6	8.45833	0.476897	0.499163	0.0237967	0.110822	0.00235637
-0.657577	-1.69897	2.30103	1.62066	2.04336	-1.30103	0.638689	-2.69897	-1.69897	0.30103	0.30103	-1.69897	-4.69897	-1.69897	-0.69897	0.30103	-1.69897	-0.69897	-2.69897	-1.69897	0.30103	-4.69897	-0.69897	-1.69897	-0.69897	-2	-4.69897	1.87216	-0.76904	1	-0.221849	-6.30103	-6	-7	-4	-1	-6.30103	-2.69897	-3.30103	-0.09691	-6	5.66667	0.311805	1.0688	0.118427	0.100739	0.0099596
-0.657577	-1.69897	2.30103	1.79865	2.04336	-1.30103	0.638689	-2.69897	-1.69897	0.30103	0.30103	-1.69897	-4.69897	-1.69897	-0.69897	0.30103	-1.69897	-0.69897	-2.69897	-1.69897	0.30103	-4.69897	-0.69897	-1.69897	-0.69897	-2	-4.69897	1.87216	1.62808	1	-0.221849	-6.30103	-6	-7	-4	-1	-6.30103	-2.69897	-3.30103	-0.09691	-6	5.875	0.61661	1.06425	0.142358	0.112191	0.00935181
-0.657577	-1.69897	2.30103	1.92454	2.04336	-1.30103	0.638689	-2.69897	-1.69897	0.30103	0.30103	-1.69897	-4.69897	-1.69897	-0.69897	0.30103	-1.69897	-0.69897	-2.69897	-1.69897	0.30103	-4.69897	-0.69897	-1.69897	-0.69897	-2	-4.69897	1.87216	1.92824	1	-0.221849	-6.30103	-6	-7	-4	-1	-6.30103	-2.69897	-3.30103	-0.09691	-6	6	0	0.927004	0.274916	0.129017	0.0143231
-0.657577	-1.69897	2.30103	2.02202	2.04336	-1.30103	0.638689	-2.69897	-1.69897	0.30103	0.30103	-1.69897	-4.69897	-1.69897	-0.69897	0.30103	-1.69897	-0.69897	-2.69897	-1.69897	0.30103	-4.69897	-0.69897	-1.69897	-0.69897	-2	-4.69897	1.87216	2.10404	1	-0.221849	-6.30103	-6	-7	-4	-1	-6.30103	-2.69897	-3.30103	-0.09691	-6	6.31818	1.24814	0.672328	0.0309075	0.137676	0.024715
-1.69897	-1.69897	2.30103	2.10158	2.04336	-1.30103	0.638689	-2.69897	-1.69897	0.30103	0.30103	-1.69897	-4.69897	-1.69897	-0.69897	0.30103	-1.69897	-0.69897	-2.69897	-1.69897	0.30103	-4.69897	-0.69897	-1.69897	-0.69897	-2	-4.69897	1.87216	2.22884	1	-0.221849	-6.30103	-6	-7	-4	-1	-6.30103	-2.69897	-3.30103	-0.09691	-6	8.54167	0.593659	0.638432	0.044292	0.109739	0.0045835
0.30103	-1.69897	2.30103	2.10158	2.04336	-1.30103	0.638689	-2.69897	-1.69897	0.30103	0.30103	-1.69897	-4.69897	-1.69897	-0.69897	0.30103	-1.69897	-0.69897	-2.69897	-1.69897	0.30103	-4.69897	-0.69897	-1.69897	-0.69897	-2	-4.69897	1.87216	2.22884	1	-0.221849	-6.30103	-6	-7	-4	-1	-6.30103	-2.69897	-3.30103	-0.09691	-6	7.16667	0.235702	0.795786	0.0450631	0.176183	0.0104049
1.30103	-1.69897	2.30103	2.10158	2.04336	-1.30103	0.638689	-2.69897	-1.69897	0.30103	0.30103	-1.69897	-4.69897	-1.69897	-0.69897	0.30103	-1.69897	-0.69897	-2.69897	-1.69897	0.30103	-4.69897	-0.69897	-1.69897	-0.69897	-2	-4.69897	1.87216	2.22884	1	-0.221849	-6.30103	-6	-7	-4	-1	-6.30103	-2.69897	-3.30103	-0.09691	-6	7.18182	0.385695	0.783558	0.0585244	0.280567	0.0165672
2.30103	-1.69897	2.30103	2.10158	2.04336	-1.30103	0.638689	-2.69897	-1.69897	0.30103	0.30103	-1.69897	-4.69897	-1.69897	-0.69897	0.30103	-1.69897	-0.69897	-2.69897	-1.69897	0.30103	-4.69897	-0.69897	-1.69897	-0.69897	-2	-4.69897	1.87216	2.22884	1	-0.221849	-6.30103	-6	-7	-4	-1	-6.30103	-2.69897	-3.30103	-0.09691	-6	9.54167	0.320048	0.682225	0.0481296	0.227878	0.0168904
-0.657577	-1.69897	-1.52288	2.10158	1.02181	-1.30103	0.638689	-2.69897	-1.69897	0.30103	0.30103	-1.69897	-4.69897	-1.69897	-0.69897	0.30103	-1.69897	-0.69897	-2.69897	-1.69897	0.30103	-4.69897	-0.69897	-1.69897	-0.69897	-2	-4.69897	1.87216	2.22884	1	-0.221849	-6.30103	-6	-7	-4	-1	-6.30103	-2.69897	-3.30103	-0.09691	-6	5.91667	0.276385	0.901835	0.11836	0.119572	0.00802134
-0.657577	-1.69897	-0.638272	2.10158	1.02592	-1.30103	0.638689	-2.69897	-1.69897	0.30103	0.30103	-1.69897	-4.69897	-1.69897	-0.69897	0.30103	-1.69897	-0.69897	-2.69897	-1.69897	0.30103	-4.69897	-0.69897	-1.69897	-0.69897	-2	-4.69897	1.87216	2.22884	1	-0.221849	-6.30103	-6	-7	-4	-1	-6.30103	-2.69897	-3.30103	-0.09691	-6	5.70833	0.246503	0.90774	0.152666	0.126878	0.00127172
-0.657577	-1.69897	0.30103	2.10158	1.0607	-1.30103	0.638689	-2.69897	-1.69897	0.30103	0.30103	-1.69897	-4.69897	-1.69897	-0.69897	0.30103	-1.69897	-0.69897	-2.69897	-1.69897	0.30103	-4.69897	-0.69897	-1.69897	-0.69897	-2	-4.69897	1.87216	2.22884	1	-0.221849	-6.30103	-6	-7	-4	-1	-6.30103	-2.69897	-3.30103	-0.09691	-6	5.66667	0.235702	0.908704	0.157152	0.125683	0.00212623
-0.657577	-1.69897	1.30103	2.10158	1.31175	-1.30103	0.638689	-2.69897	-1.69897	0.30103	0.30103	-1.69897	-4.69897	-1.69897	-0.69897	0.30103	-1.69897	-0.69897	-2.69897	-1.69897	0.30103	-4.69897	-0.69897	-1.69897	-0.69897	-2	-4.69897	1.87216	2.22884	1	-0.221849	-6.30103	-6	-7	-4	-1	-6.30103	-2.69897	-3.30103	-0.09691	-6	5.75	0.25	0.96252	0.18377	0.127425	0.0018411
-0.657577	-1.69897	2.30125	2.10158	2.04336	-1.30103	0.648555	-2.69897	-1.69897	0.30103	0.30103	-1.69897	-4.69897	-1.69897	-0.69897	0.30103	-1.69897	-0.69897	-2.69897	-1.69897	0.30103	-4.69897	-0.69897	-1.69897	-0.69897	-2	-4.69897	1.87216	2.22884	1	-0.221849	-6.30103	-6	-7	-4	-1	-6.30103	-2.69897	-3.30103	-0.09691	-6	6.91667	0.343592	0.643458	0.0318261	0.127231	0.0102889
-0.657577	-1.69897	2.3032	2.10158	2.04336	-1.30103	0.728516	-2.69897	-1.69897	0.30103	0.30103	-1.69897	-4.69897	-1.69897	-0.69897	0.30103	-1.69897	-0.69897	-2.69897	-1.69897	0.30103	-4.69897	-0.69897	-1.69897	-0.69897	-2	-4.69897	1.87216	2.22884	1	-0.221849	-6.30103	-6	-7	-4	-1	-6.30103	-2.69897	-3.30103	-0.09691	-6	6.5	0.353553	0.608581	0.0282453	0.124322	0.00364472
-0.657577	-1.69897	2.32222	2.10158	2.04336	-1.30103	1.15691	-2.69897	-1.69897	0.30103	0.30103	-1.69897	-4.69897	-1.69897	-0.69897	0.30103	-1.69897	-0.69897	-2.69897	-1.69897	0.30103	-4.69897	-0.69897	-1.69897	-0.69897	-2	-4.69897	1.87216	2.22884	1	-0.221849	-6.30103	-6	-7	-4	-1	-6.30103	-2.69897	-3.30103	-0.09691	-6	6.875	0.414578	0.620902	0.0214426	0.125183	0.00448893
-0.657577	-1.69897	2.47712	2.10158	2.04336	-1.30103	2.0185	-2.69897	-1.69897	0.30103	0.30103	-1.69897	-4.69897	-1.69897	-0.69897	0.30103	-1.69897	-0.69897	-2.69897	-1.69897	0.30103	-4.69897	-0.69897	-1.69897	-0.69897	-2	-4.69897	1.87216	2.22884	1	-0.221849	-6.30103	-6	-7	-4	-1	-6.30103	-2.69897	-3.30103	-0.09691	-6	8.83333	0.311805	0.539543	0.0112996	0.141406	0.00998838
-0.657577	-1.69897	2.30103	2.10158	2.04336	-1.30103	0.638689	-4.69897	-1.69897	0.30103	0.30103	-1.69897	-4.69897	-1.69897	-0.69897	0.30103	-1.69897	-0.69897	-2.69897	-1.69897	0.30103	-4.69897	-0.69897	-1.69897	-0.69897	-2	-4.69897	1.87216	2.22884	1	-0.221849	-6.30103	-6	-7	-4	-1	-6.30103	-2.69897	-3.30103	-0.09691	-6	7	0.288675	0.616848	0.0221336	0.123961	0.00728959
-0.657577	-1.69897	2.30103	2.10158	2.04336	-1.30103	0.638689	-1.69897	-1.69897	0.30103	0.30103	-1.69897	-4.69897	-1.69897	-0.69897	0.30103	-1.69897	-0.69897	-2.69897	-1.69897	0.30103	-4.69897	-0.69897	-1.69897	-0.69897	-2	-4.69897	1.87216	2.22884	1	-0.221849	-6.30103	-6	-7	-4	-1	-6.30103	-2.69897	-3.30103	-0.09691	-6	6.95833	0.379601	0.645762	0.0107853	0.127211	0.00963629
-0.657577	-1.69897	2.30103	2.10158	2.04336	-1.30103	0.638689	-0.69897	-1.69897	0.30103	0.30103	-1.69897	-4.69897	-1.69897	-0.69897	0.30103	-1.69897	-0.69897	-2.69897	-1.69897	0.30103	-4.69897	-0.69897	-1.69897	-0.69897	-2	-4.69897	1.87216	2.22884	1	-0.221849	-6.30103	-6	-7	-4	-1	-6.30103	-2.69897	-3.30103	-0.09691	-6	6.54167	0.246503	0.726238	0.120933	0.136342	0.00544039
-0.657577	-1.69897	2.30103	2.10158	2.04336	-1.30103	0.638689	0.30103	-1.69897	0.30103	0.30103	-1.69897	-4.69897	-1.69897	-0.69897	0.30103	-1.69897	-0.69897	-2.69897	-1.69897	0.30103	-4.69897	-0.69897	-1.69897	-0.69897	-2	-4.69897	1.87216	2.22884	1	-0.221849	-6.30103	-6	-7	-4	-1	-6.30103	-2.69897	-3.30103	-0.09691	-6	6.41667	0.343592	0.846566	0.130773	0.175767	0.00605989
-0.657577	-1.69897	2.30103	2.10158	2.04336	-1.30103	0.636688	-2.69897	-4.69897	0.30103	0.30103	-1.69897	-4.69897	-1.69897	-0.69897	0.30103	-1.69897	-0.69897	-2.69897	-1.69897	0.30103	-4.69897	-0.69897	-1.69897	-0.69897	-2	-4.69897	1.87216	2.22884	1	-0.221849	-6.30103	-6	-7	-4	-1	-6.30103	-2.69897	-3.30103	-0.09691	-6	7.16667	0.311805	0.651518	0.0499329	0.122183	0.00519103
-0.657577	-1.69897	2.30103	2.10158	2.04336	-1.30103	0.636889	-2.69897	-2.69897	0.30103	0.30103	-1.69897	-4.69897	-1.69897	-0.69897	0.30103	-1.69897	-0.69897	-2.69897	-1.69897	0.30103	-4.69897	-0.69897	-1.69897	-0.69897	-2	-4.69897	1.87216	2.22884	1	-0.221849	-6.30103	-6	-7	-4	-1	-6.30103	-2.69897	-3.30103	-0.09691	-6	7.08333	0.276385	0.620676	0.0209916	0.120378	0.00313532
-0.657577	-1.69897	2.30103	2.10158	2.04336	-1.30103	0.65629	-2.69897	-0.69897	0.30103	0.30103	-1.69897	-4.69897	-1.69897	-0.69897	0.30103	-1.69897	-0.69897	-2.69897	-1.69897	0.30103	-4.69897	-0.69897	-1.69897	-0.69897	-2	-4.69897	1.87216	2.22884	1	-0.221849	-6.30103	-6	-7	-4	-1	-6.30103	-2.69897	-3.30103	-0.09691	-6	6.875	0.360844	0.657803	0.0370078	0.125544	0.00579005
-0.657577	-1.69897	2.30103	2.10158	2.04336	-1.30103	0.801541	-2.69897	0.30103	0.30103	0.30103	-1.69897	-4.69897	-1.69897	-0.69897	0.30103	-1.69897	-0.69897	-2.69897	-1.69897	0.30103	-4.69897	-0.69897	-1.69897	-0.69897	-2	-4.69897	1.87216	2.22884	1	-0.221849	-6.30103	-6	-7	-4	-1	-6.30103	-2.69897	-3.30103	-0.09691	-6	6.95833	0.246503	0.631325	0.0127241	0.129322	0.00605734
-0.657577	-1.69897	2.30103	2.10158	2.04336	-1.30103	0.638689	-2.69897	-1.69897	-4.69897	0.30103	-1.69897	-4.69897	-1.69897	-0.69897	0.30103	-1.69897	-0.69897	-2.69897	-1.69897	0.30103	-4.69897	-0.69897	-1.69897	-0.69897	-2	-4.69897	1.87216	2.22884	1	-0.221849	-6.30103	-6	-7	-4	-1	-6.30103	-2.69897	-3.30103	-0.09691	-6	6.95833	0.320048	0.604344	0.0192196	0.123822	0.0107959
-0.657577	-1.69897	2.30103	2.10158	2.04336	-1.30103	0.638689	-2.69897	-1.69897	-2.69897	0.30103	-1.69897	-4.69897	-1.69897	-0.69897	0.30103	-1.69897	-0.69897	-2.69897	-1.69897	0.30103	-4.69897	-0.69897	-1.69897	-0.69897	-2	-4.69897	1.87216	2.22884	1	-0.221849	-6.30103	-6	-7	-4	-1	-6.30103	-2.69897	-3.30103	-0.09691	-6	6.91667	0.399653	0.642571	0.0551553	0.120433	0.012249
-0.657577	-1.69897	2.30103	2.10158	2.04336	-1.30103	0.638689	-2.69897	-1.69897	-1.69897	0.30103	-1.69897	-4.69897	-1.69897	-0.69897	0.30103	-1.69897	-0.69897	-2.69897	-1.69897	0.30103	-4.69897	-0.69897	-1.69897	-0.69897	-2	-4.69897	1.87216	2.22884	1	-0.221849	-6.30103	-6	-7	-4	-1	-6.30103	-2.69897	-3.30103	-0.09691	-6	7	0.408248	0.619332	0.0171044	0.119645	0.00658322
-0.657577	-1.69897	2.30103	2.10158	2.04336	-1.30103	0.638689	-2.69897	-1.69897	-0.69897	0.30103	-1.69897	-4.69897	-1.69897	-0.69897	0.30103	-1.69897	-0.69897	-2.69897	-1.69897	0.30103	-4.69897	-0.69897	-1.69897	-0.69897	-2	-4.69897	1.87216	2.22884	1	-0.221849	-6.30103	-6	-7	-4	-1	-6.30103	-2.69897	-3.30103	-0.09691	-6	7.08333	0.448764	0.625524	0.0327938	0.125656	0.0108912
-0.657577	-1.69897	2.30103	2.10158	2.04336	-1.30103	0.638689	-2.69897	-1.69897	0.30103	-4.69897	-1.69897	-4.69897	-1.69897	-0.69897	0.30103	-1.69897	-0.69897	-2.69897	-1.69897	0.30103	-4.69897	-0.69897	-1.69897	-0.69897	-2	-4.69897	1.87216	2.22884	1	-0.221849	-6.30103	-6	-7	-4	-1	-6.30103	-2.69897	-3.30103	-0.09691	-6	8.125	0.216506	0.632999	0.0319794	0.126767	0.014437
-0.657577	-1.69897	2.30103	2.10158	2.04336	-1.30103	0.638689	-2.69897	-1.69897	0.30103	-2.69897	-1.69897	-4.69897	-1.69897	-0.69897	0.30103	-1.69897	-0.69897	-2.69897	-1.69897	0.30103	-4.69897	-0.69897	-1.69897	-0.69897	-2	-4.69897	1.87216	2.22884	1	-0.221849	-6.30103	-6	-7	-4	-1	-6.30103	-2.69897	-3.30103	-0.09691	-6	7.58333	0.399653	0.609833	0.0203579	0.122044	0.0112783
-0.657577	-1.69897	2.30103	2.10158	2.04336	-1.30103	0.638689	-2.69897	-1.69897	0.30103	-1.69897	-1.69897	-4.69897	-1.69897	-0.69897	0.30103	-1.69897	-0.69897	-2.69897	-1.69897	0.30103	-4.69897	-0.69897	-1.69897	-0.69897	-2	-4.69897	1.87216	2.22884	1	-0.221849	-6.30103	-6	-7	-4	-1	-6.30103	-2.69897	-3.30103	-0.09691	-6	7.20833	0.246503	0.599076	0.0339384	0.118683	0.00628214
-0.657577	-1.69897	2.30103	2.10158	2.04336	-1.30103	0.638689	-2.69897	-1.69897	0.30103	0.30103	-1.69897	-4.69897	-1.69897	-0.69897	0.30103	-1.69897	-0.69897	-2.69897	-1.69897	0.30103	-4.69897	-0.69897	-1.69897	-0.69897	-2	-4.69897	1.87216	2.22884	1	-0.221849	-6.30103	-6	-7	-4	-1	-6.30103	-2.69897	-3.30103	-0.09691	-6	6.875	0.360844	0.62591	0.0138675	0.127239	0.00792962
-0.657577	-1.69897	2.30103	2.10158	2.04336	-1.30103	0.636688	-2.69897	-1.69897	0.30103	0.30103	-4.69897	-4.69897	-1.69897	-0.69897	0.30103	-1.69897	-0.69897	-2.69897	-1.69897	0.30103	-4.69897	-0.69897	-1.69897	-0.69897	-2	-4.69897	1.87216	2.22884	1	-0.221849	-6.30103	-6	-7	-4	-1	-6.30103	-2.69897	-3.30103	-0.09691	-6	7.125	0.216506	0.631639	0.0279064	0.131017	0.0106015
-0.657577	-1.69897	2.30103	2.10158	2.04336	-1.30103	0.636889	-2.69897	-1.69897	0.30103	0.30103	-2.69897	-4.69897	-1.69897	-0.69897	0.30103	-1.69897	-0.69897	-2.69897	-1.69897	0.30103	-4.69897	-0.69897	-1.69897	-0.69897	-2	-4.69897	1.87216	2.22884	1	-0.221849	-6.30103	-6	-7	-4	-1	-6.30103	-2.69897	-3.30103	-0.09691	-6	7.25	0.25	0.639413	0.0112885	0.120794	0.00169672
-0.657577	-1.69897	2.30103	2.10158	2.04336	-1.30103	0.65629	-2.69897	-1.69897	0.30103	0.30103	-0.69897	-4.69897	-1.69897	-0.69897	0.30103	-1.69897	-0.69897	-2.69897	-1.69897	0.30103	-4.69897	-0.69897	-1.69897	-0.69897	-2	-4.69897	1.87216	2.22884	1	-0.221849	-6.30103	-6	-7	-4	-1	-6.30103	-2.69897	-3.30103	-0.09691	-6	7.5	0.288675	0.595406	0.0342485	0.124183	0.00290633
-0.657577	-1.69897	2.30103	2.10158	2.04336	-1.30103	0.801541	-2.69897	-1.69897	0.30103	0.30103	0.30103	-4.69897	-1.69897	-0.69897	0.30103	-1.69897	-0.69897	-2.69897	-1.69897	0.30103	-4.69897	-0.69897	-1.69897	-0.69897	-2	-4.69897	1.87216	2.22884	1	-0.221849	-6.30103	-6	-7	-4	-1	-6.30103	-2.69897	-3.30103	-0.09691	-6	16.4167	0.759203	0.599059	0.0313229	0.127342	0.00335475
-0.657577	-1.69897	2.30103	2.10158	2.04336	-1.30103	0.638888	-2.69897	-1.69897	0.30103	0.30103	-1.69897	-2.69897	-1.69897	-0.69897	0.30103	-1.69897	-0.69897	-2.69897	-1.69897	0.30103	-4.69897	-0.69897	-1.69897	-0.69897	-2	-4.69897	1.87216	2.22884	1	-0.221849	-6.30103	-6	-7	-4	-1	-6.30103	-2.69897	-3.30103	-0.09691	-6	7.08333	0.276385	0.65932	0.0469476	0.130147	0.00764468
-0.657577	-1.69897	2.30103	2.10158	2.04336	-1.30103	0.64068	-2.69897	-1.69897	0.30103	0.30103	-1.69897	-1.69897	-1.69897	-0.69897	0.30103	-1.69897	-0.69897	-2.69897	-1.69897	0.30103	-4.69897	-0.69897	-1.69897	-0.69897	-2	-4.69897	1.87216	2.22884	1	-0.221849	-6.30103	-6	-7	-4	-1	-6.30103	-2.69897	-3.30103	-0.09691	-6	6.45833	0.320048	0.638648	0.0214686	0.12885	0.00724201
-0.657577	-1.69897	2.30103	2.10158	2.04336	-1.30103	0.658202	-2.69897	-1.69897	0.30103	0.30103	-1.69897	-0.69897	-1.69897	-0.69897	0.30103	-1.69897	-0.69897	-2.69897	-1.69897	0.30103	-4.69897	-0.69897	-1.69897	-0.69897	-2	-4.69897	1.87216	2.22884	1	-0.221849	-6.30103	-6	-7	-4	-1	-6.30103	-2.69897	-3.30103	-0.09691	-6	5.875	0.29756	0.707139	0.0216451	0.143739	0.00515044
-0.657577	-1.69897	2.30103	2.10158	2.04336	-1.30103	0.80291	-2.69897	-1.69897	0.30103	0.30103	-1.69897	0.30103	-1.69897	-0.69897	0.30103	-1.69897	-0.69897	-2.69897	-1.69897	0.30103	-4.69897	-0.69897	-1.69897	-0.69897	-2	-4.69897	1.87216	2.22884	1	-0.221849	-6.30103	-6	-7	-4	-1	-6.30103	-2.69897	-3.30103	-0.09691	-6	7.58333	0.493007	0.726495	0.0251328	0.148739	0.00619058
-0.657577	-1.69897	2.30103	2.10158	2.04336	-1.30103	0.638689	-2.69897	-1.69897	0.30103	0.30103	-1.69897	-4.69897	-4.69897	-0.69897	0.30103	-1.69897	-0.69897	-2.69897	-1.69897	0.30103	-4.69897	-0.69897	-1.69897	-0.69897	-2	-4.69897	1.87216	2.22884	1	-0.221849	-6.30103	-6	-7	-4	-1	-6.30103	-2.69897	-3.30103	-0.09691	-6	7.375	0.360844	0.606708	0.0187123	0.127433	0.00273523
-0.657577	-1.69897	2.30103	2.10158	2.04336	-1.30103	0.638689	-2.69897	-1.69897	0.30103	0.30103	-1.69897	-4.69897	-2.69897	-0.69897	0.30103	-1.69897	-0.69897	-2.69897	-1.69897	0.30103	-4.69897	-0.69897	-1.69897	-0.69897	-2	-4.69897	1.87216	2.22884	1	-0.221849	-6.30103	-6	-7	-4	-1	-6.30103	-2.69897	-3.30103	-0.09691	-6	7	0.288675	0.625037	0.0346257	0.129822	0.00628908
-0.657577	-1.69897	2.30103	2.10158	2.04336	-1.30103	0.638689	-2.69897	-1.69897	0.30103	0.30103	-1.69897	-4.69897	-0.69897	-0.69897	0.30103	-1.69897	-0.69897	-2.69897	-1.69897	0.30103	-4.69897	-0.69897	-1.69897	-0.69897	-2	-4.69897	1.87216	2.22884	1	-0.221849	-6.30103	-6	-7	-4	-1	-6.30103	-2.69897	-3.30103	-0.09691	-6	6.375	0.360844	0.642412	0.0255322	0.134794	0.00293907
-0.657577	-1.69897	2.30103	2.10158	2.04336	-1.30103	0.638689	-2.69897	-1.69897	0.30103	0.30103	-1.69897	-4.69897	0.30103	-0.69897	0.30103	-1.69897	-0.69897	-2.69897	-1.69897	0.30103	-4.69897	-0.69897	-1.69897	-0.69897	-2	-4.69897	1.87216	2.22884	1	-0.221849	-6.30103	-6	-7	-4	-1	-6.30103	-2.69897	-3.30103	-0.09691	-6	5.875	0.216506	0.704526	0.031112	0.155294	0.00511073
-0.657577	-1.69897	2.30103	2.10158	2.04336	-1.30103	0.638689	-2.69897	-1.69897	0.30103	0.30103	-1.69897	-4.69897	-1.69897	-4.69897	0.30103	-1.69897	-0.69897	-2.69897	-1.69897	0.30103	-4.69897	-0.69897	-1.69897	-0.69897	-2	-4.69897	1.87216	2.22884	1	-0.221849	-6.30103	-6	-7	-4	-1	-6.30103	-2.69897	-3.30103	-0.09691	-6	8.16667	0.372678	0.687954	0.129793	0.120017	0.00896405
-0.657577	-1.69897	2.30103	2.10158	2.04336	-1.30103	0.638689	-2.69897	-1.69897	0.30103	0.30103	-1.69897	-4.69897	-1.69897	-2.69897	0.30103	-1.69897	-0.69897	-2.69897	-1.69897	0.30103	-4.69897	-0.69897	-1.69897	-0.69897	-2	-4.69897	1.87216	2.22884	1	-0.221849	-6.30103	-6	-7	-4	-1	-6.30103	-2.69897	-3.30103	-0.09691	-6	6.91667	0.399653	0.667599	0.0690461	0.112822	0.00361538
-0.657577	-1.69897	2.30103	2.10158	2.04336	-1.30103	0.638689	-2.69897	-1.69897	0.30103	0.30103	-1.69897	-4.69897	-1.69897	-1.69897	0.30103	-1.69897	-0.69897	-2.69897	-1.69897	0.30103	-4.69897	-0.69897	-1.69897	-0.69897	-2	-4.69897	1.87216	2.22884	1	-0.221849	-6.30103	-6	-7	-4	-1	-6.30103	-2.69897	-3.30103	-0.09691	-6	6.875	0.29756	0.688327	0.0784009	0.11335	0.00274916
-0.657577	-1.69897	2.30103	2.10158	2.04336	-1.30103	0.638689	-2.69897	-1.69897	0.30103	0.30103	-1.69897	-4.69897	-1.69897	0.30103	0.30103	-1.69897	-0.69897	-2.69897	-1.69897	0.30103	-4.69897	-0.69897	-1.69897	-0.69897	-2	-4.69897	1.87216	2.22884	1	-0.221849	-6.30103	-6	-7	-4	-1	-6.30103	-2.69897	-3.30103	-0.09691	-6	6.91667	0.399653	0.595676	0.0303763	0.130933	0.00321599
-0.657577	-1.69897	2.30103	2.10158	2.04336	-1.30103	0.371437	-2.69897	-1.69897	0.30103	0.30103	-1.69897	-4.69897	-1.69897	-0.69897	-4.69897	-1.69897	-0.69897	-2.69897	-1.69897	0.30103	-4.69897	-0.69897	-1.69897	-0.69897	-2	-4.69897	1.87216	2.22884	1	-0.221849	-6.30103	-6	-7	-4	-1	-6.30103	-2.69897	-3.30103	-0.09691	-6	6.79167	0.320048	0.722502	0.104433	0.123656	0.00813125
-0.657577	-1.69897	2.30103	2.10158	2.04336	-1.30103	0.371806	-2.69897	-1.69897	0.30103	0.30103	-1.69897	-4.69897	-1.69897	-0.69897	-2.69897	-1.69897	-0.69897	-2.69897	-1.69897	0.30103	-4.69897	-0.69897	-1.69897	-0.69897	-2	-4.69897	1.87216	2.22884	1	-0.221849	-6.30103	-6	-7	-4	-1	-6.30103	-2.69897	-3.30103	-0.09691	-6	6.625	0.216506	0.684362	0.0613599	0.12435	0.00594594
-0.657577	-1.69897	2.30103	2.10158	2.04336	-1.30103	0.375115	-2.69897	-1.69897	0.30103	0.30103	-1.69897	-4.69897	-1.69897	-0.69897	-1.69897	-1.69897	-0.69897	-2.69897	-1.69897	0.30103	-4.69897	-0.69897	-1.69897	-0.69897	-2	-4.69897	1.87216	2.22884	1	-0.221849	-6.30103	-6	-7	-4	-1	-6.30103	-2.69897	-3.30103	-0.09691	-6	6.70833	0.476897	0.649919	0.0707018	0.123044	0.0053866
-0.657577	-1.69897	2.30103	2.10158	2.04336	-1.30103	0.406881	-2.69897	-1.69897	0.30103	0.30103	-1.69897	-4.69897	-1.69897	-0.69897	-0.69897	-1.69897	-0.69897	-2.69897	-1.69897	0.30103	-4.69897	-0.69897	-1.69897	-0.69897	-2	-4.69897	1.87216	2.22884	1	-0.221849	-6.30103	-6	-7	-4	-1	-6.30103	-2.69897	-3.30103	-0.09691	-6	6.75	0.381881	0.624759	0.0246118	0.123544	0.00322414
-0.657577	-1.69897	2.30103	2.10158	2.04336	-1.30103	0.638689	-2.69897	-1.69897	0.30103	0.30103	-1.69897	-4.69897	-1.69897	-0.69897	0.30103	-4.69897	-0.69897	-2.69897	-1.69897	0.30103	-4.69897	-0.69897	-1.69897	-0.69897	-2	-4.69897	1.87216	2.22884	1	-0.221849	-6.30103	-6	-7	-4	-1	-6.30103	-2.69897	-3.30103	-0.09691	-6	11.125	0.360844	0.741594	0.0313289	0.111294	0.00614705
-0.657577	-1.69897	2.30103	2.10158	2.04336	-1.30103	0.638689	-2.69897	-1.69897	0.30103	0.30103	-1.69897	-4.69897	-1.69897	-0.69897	0.30103	-2.69897	-0.69897	-2.69897	-1.69897	0.30103	-4.69897	-0.69897	-1.69897	-0.69897	-2	-4.69897	1.87216	2.22884	1	-0.221849	-6.30103	-6	-7	-4	-1	-6.30103	-2.69897	-3.30103	-0.09691	-6	9.41667	0.399653	0.772767	0.108593	0.113342	0.00286424
-0.657577	-1.69897	2.30103	2.10158	2.04336	-1.30103	0.638689	-2.69897	-1.69897	0.30103	0.30103	-1.69897	-4.69897	-1.69897	-0.69897	0.30103	-0.69897	-0.69897	-2.69897	-1.69897	0.30103	-4.69897	-0.69897	-1.69897	-0.69897	-2	-4.69897	1.87216	2.22884	1	-0.221849	-6.30103	-6	-7	-4	-1	-6.30103	-2.69897	-3.30103	-0.09691	-6	6.75	0.433013	0.622415	0.0358616	0.123461	0.0050101
-0.657577	-1.69897	2.30103	2.10158	2.04336	-1.30103	0.638689	-2.69897	-1.69897	0.30103	0.30103	-1.69897	-4.69897	-1.69897	-0.69897	0.30103	0.30103	-0.69897	-2.69897	-1.69897	0.30103	-4.69897	-0.69897	-1.69897	-0.69897	-2	-4.69897	1.87216	2.22884	1	-0.221849	-6.30103	-6	-7	-4	-1	-6.30103	-2.69897	-3.30103	-0.09691	-6	7	0.288675	0.637301	0.0200398	0.123906	0.00447722
-0.657577	-1.69897	2.30103	2.10158	2.04336	-1.30103	0.638689	-2.69897	-1.69897	0.30103	0.30103	-1.69897	-4.69897	-1.69897	-0.69897	0.30103	-1.69897	-4.69897	-2.69897	-1.69897	0.30103	-4.69897	-0.69897	-1.69897	-0.69897	-2	-4.69897	1.87216	2.22884	1	-0.221849	-6.30103	-6	-7	-4	-1	-6.30103	-2.69897	-3.30103	-0.09691	-6	7.16667	0.471405	0.626303	0.0343545	0.104739	0.00533413
-0.657577	-1.69897	2.30103	2.10158	2.04336	-1.30103	0.638689	-2.69897	-1.69897	0.30103	0.30103	-1.69897	-4.69897	-1.69897	-0.69897	0.30103	-1.69897	-2.69897	-2.69897	-1.69897	0.30103	-4.69897	-0.69897	-1.69897	-0.69897	-2	-4.69897	1.87216	2.22884	1	-0.221849	-6.30103	-6	-7	-4	-1	-6.30103	-2.69897	-3.30103	-0.09691	-6	7.125	0.581843	0.603705	0.0128941	0.106044	0.00376345
-0.657577	-1.69897	2.30103	2.10158	2.04336	-1.30103	0.638689	-2.69897	-1.69897	0.30103	0.30103	-1.69897	-4.69897	-1.69897	-0.69897	0.30103	-1.69897	-1.69897	-2.69897	-1.69897	0.30103	-4.69897	-0.69897	-1.69897	-0.69897	-2	-4.69897	1.87216	2.22884	1	-0.221849	-6.30103	-6	-7	-4	-1	-6.30103	-2.69897	-3.30103	-0.09691	-6	6.83333	0.311805	0.651235	0.0356564	0.111767	0.00505708
-0.657577	-1.69897	2.30103	2.10158	2.04336	-1.30103	0.638689	-2.69897	-1.69897	0.30103	0.30103	-1.69897	-4.69897	-1.69897	-0.69897	0.30103	-1.69897	0.30103	-2.69897	-1.69897	0.30103	-4.69897	-0.69897	-1.69897	-0.69897	-2	-4.69897	1.87216	2.22884	1	-0.221849	-6.30103	-6	-7	-4	-1	-6.30103	-2.69897	-3.30103	-0.09691	-6	10.5417	0.246503	0.755384	0.0515321	0.120378	0.00770742
-0.657577	-1.69897	2.30103	2.10158	2.04336	-1.30103	0.638489	-2.69897	-1.69897	0.30103	0.30103	-1.69897	-4.69897	-1.69897	-0.69897	0.30103	-1.69897	-0.69897	-4.69897	-1.69897	0.30103	-4.69897	-0.69897	-1.69897	-0.69897	-2	-4.69897	1.87216	2.22884	1	-0.221849	-6.30103	-6	-7	-4	-1	-6.30103	-2.69897	-3.30103	-0.09691	-6	7.375	0.360844	0.632028	0.0270688	0.128072	0.00783447
-0.657577	-1.69897	2.30103	2.10158	2.04336	-1.30103	0.640481	-2.69897	-1.69897	0.30103	0.30103	-1.69897	-4.69897	-1.69897	-0.69897	0.30103	-1.69897	-0.69897	-1.69897	-1.69897	0.30103	-4.69897	-0.69897	-1.69897	-0.69897	-2	-4.69897	1.87216	2.22884	1	-0.221849	-6.30103	-6	-7	-4	-1	-6.30103	-2.69897	-3.30103	-0.09691	-6	6.70833	0.320048	0.658552	0.0320037	0.125294	0.00596356
-0.657577	-1.69897	2.30103	2.10158	2.04336	-1.30103	0.658011	-2.69897	-1.69897	0.30103	0.30103	-1.69897	-4.69897	-1.69897	-0.69897	0.30103	-1.69897	-0.69897	-0.69897	-1.69897	0.30103	-4.69897	-0.69897	-1.69897	-0.69897	-2	-4.69897	1.87216	2.22884	1	-0.221849	-6.30103	-6	-7	-4	-1	-6.30103	-2.69897	-3.30103	-0.09691	-6	6.875	0.29756	0.617329	0.0179613	0.126656	0.00316033
-0.657577	-1.69897	2.30103	2.10158	2.04336	-1.30103	0.802774	-2.69897	-1.69897	0.30103	0.30103	-1.69897	-4.69897	-1.69897	-0.69897	0.30103	-1.69897	-0.69897	0.30103	-1.69897	0.30103	-4.69897	-0.69897	-1.69897	-0.69897	-2	-4.69897	1.87216	2.22884	1	-0.221849	-6.30103	-6	-7	-4	-1	-6.30103	-2.69897	-3.30103	-0.09691	-6	6.29167	0.246503	0.614405	0.0303035	0.130656	0.00370768
-0.657577	-1.69897	2.30103	2.10158	2.04336	-1.30103	0.638689	-2.69897	-1.69897	0.30103	0.30103	-1.69897	-4.69897	-1.69897	-0.69897	0.30103	-1.69897	-0.69897	-2.69897	-4.69897	0.30103	-4.69897	-0.69897	-1.69897	-0.69897	-2	-4.69897	1.87216	2.22884	1	-0.221849	-6.30103	-6	-7	-4	-1	-6.30103	-2.69897	-3.30103	-0.09691	-6	6.95833	0.379601	0.644797	0.0296818	0.121767	0.00181897
-0.657577	-1.69897	2.30103	2.10158	2.04336	-1.30103	0.638689	-2.69897	-1.69897	0.30103	0.30103	-1.69897	-4.69897	-1.69897	-0.69897	0.30103	-1.69897	-0.69897	-2.69897	-2.69897	0.30103	-4.69897	-0.69897	-1.69897	-0.69897	-2	-4.69897	1.87216	2.22884	1	-0.221849	-6.30103	-6	-7	-4	-1	-6.30103	-2.69897	-3.30103	-0.09691	-6	6.75	0.25	0.597487	0.0347903	0.126767	0.0148436
-0.657577	-1.69897	2.30103	2.10158	2.04336	-1.30103	0.638689	-2.69897	-1.69897	0.30103	0.30103	-1.69897	-4.69897	-1.69897	-0.69897	0.30103	-1.69897	-0.69897	-2.69897	-0.69897	0.30103	-4.69897	-0.69897	-1.69897	-0.69897	-2	-4.69897	1.87216	2.22884	1	-0.221849	-6.30103	-6	-7	-4	-1	-6.30103	-2.69897	-3.30103	-0.09691	-6	6.70833	0.246503	0.620823	0.0316769	0.121822	0.00471961
-0.657577	-1.69897	2.30103	2.10158	2.04336	-1.30103	0.638689	-2.69897	-1.69897	0.30103	0.30103	-1.69897	-4.69897	-1.69897	-0.69897	0.30103	-1.69897	-0.69897	-2.69897	0.30103	0.30103	-4.69897	-0.69897	-1.69897	-0.69897	-2	-4.69897	1.87216	2.22884	1	-0.221849	-6.30103	-6	-7	-4	-1	-6.30103	-2.69897	-3.30103	-0.09691	-6	6.70833	0.431003	0.611531	0.0220659	0.127044	0.00304544
-0.657577	-1.69897	2.30103	2.10158	2.04336	-1.30103	0.638689	-2.69897	-1.69897	0.30103	0.30103	-1.69897	-4.69897	-1.69897	-0.69897	0.30103	-1.69897	-0.69897	-2.69897	-1.69897	-4.69897	-4.69897	-0.69897	-1.69897	-0.69897	-2	-4.69897	1.87216	2.22884	1	-0.221849	-6.30103	-6	-7	-4	-1	-6.30103	-2.69897	-3.30103	-0.09691	-6	6.95833	0.379601	0.613252	0.021191	0.122683	0.00623777
-0.657577	-1.69897	2.30103	2.10158	2.04336	-1.30103	0.638689	-2.69897	-1.69897	0.30103	0.30103	-1.69897	-4.69897	-1.69897	-0.69897	0.30103	-1.69897	-0.69897	-2.69897	-1.69897	-2.69897	-4.69897	-0.69897	-1.69897	-0.69897	-2	-4.69897	1.87216	2.22884	1	-0.221849	-6.30103	-6	-7	-4	-1	-6.30103	-2.69897	-3.30103	-0.09691	-6	6.66667	0.235702	0.62216	0.013177	0.125433	0.005696
-0.657577	-1.69897	2.30103	2.10158	2.04336	-1.30103	0.638689	-2.69897	-1.69897	0.30103	0.30103	-1.69897	-4.69897	-1.69897	-0.69897	0.30103	-1.69897	-0.69897	-2.69897	-1.69897	-1.69897	-4.69897	-0.69897	-1.69897	-0.69897	-2	-4.69897	1.87216	2.22884	1	-0.221849	-6.30103	-6	-7	-4	-1	-6.30103	-2.69897	-3.30103	-0.09691	-6	6.70833	0.320048	0.624514	0.0114272	0.125282	0.00587816
-0.657577	-1.69897	2.30103	2.10158	2.04336	-1.30103	0.638689	-2.69897	-1.69897	0.30103	0.30103	-1.69897	-4.69897	-1.69897	-0.69897	0.30103	-1.69897	-0.69897	-2.69897	-1.69897	-0.69897	-4.69897	-0.69897	-1.69897	-0.69897	-2	-4.69897	1.87216	2.22884	1	-0.221849	-6.30103	-6	-7	-4	-1	-6.30103	-2.69897	-3.30103	-0.09691	-6	6.54545	0.396264	0.613472	0.030017	0.125739	0.00641967
-0.657577	-1.69897	2.30103	2.10158	2.04336	-1.30103	0.638689	-2.69897	-1.69897	0.30103	0.30103	-1.69897	-4.69897	-1.69897	-0.69897	0.30103	-1.69897	-0.69897	-2.69897	-1.69897	0.30103	-2.69897	-0.69897	-1.69897	-0.69897	-2	-4.69897	1.87216	2.22884	1	-0.221849	-6.30103	-6	-7	-4	-1	-6.30103	-2.69897	-3.30103	-0.09691	-6	6.58333	0.343592	0.628267	0.0344008	0.125128	0.00490174
-0.657577	-1.69897	2.30103	2.10158	2.04336	-1.30103	0.638689	-2.69897	-1.69897	0.30103	0.30103	-1.69897	-4.69897	-1.69897	-0.69897	0.30103	-1.69897	-0.69897	-2.69897	-1.69897	0.30103	-1.69897	-0.69897	-1.69897	-0.69897	-2	-4.69897	1.87216	2.22884	1	-0.221849	-6.30103	-6	-7	-4	-1	-6.30103	-2.69897	-3.30103	-0.09691	-6	6.25	0.25	0.654408	0.0306207	0.129211	0.00379896
-0.657577	-1.69897	2.30103	2.10158	2.04336	-1.30103	0.638689	-2.69897	-1.69897	0.30103	0.30103	-1.69897	-4.69897	-1.69897	-0.69897	0.30103	-1.69897	-0.69897	-2.69897	-1.69897	0.30103	-0.69897	-0.69897	-1.69897	-0.69897	-2	-4.69897	1.87216	2.22884	1	-0.221849	-6.30103	-6	-7	-4	-1	-6.30103	-2.69897	-3.30103	-0.09691	-6	5.91667	0.343592	0.744805	0.0233759	0.151183	0.00656608
-0.657577	-1.69897	2.30103	2.10158	2.04336	-1.30103	0.638689	-2.69897	-1.69897	0.30103	0.30103	-1.69897	-4.69897	-1.69897	-0.69897	0.30103	-1.69897	-0.69897	-2.69897	-1.69897	0.30103	0.30103	-0.69897	-1.69897	-0.69897	-2	-4.69897	1.87216	2.22884	1	-0.221849	-6.30103	-6	-7	-4	-1	-6.30103	-2.69897	-3.30103	-0.09691	-6	5.95833	0.431003	0.799768	0.0266159	0.21685	0.0156774
-0.657577	-1.69897	2.30103	2.10158	2.04336	-1.30103	0.638689	-2.69897	-1.69897	0.30103	0.30103	-1.69897	-4.69897	-1.69897	-0.69897	0.30103	-1.69897	-0.69897	-2.69897	-1.69897	0.30103	-4.69897	-4.69897	-1.69897	-0.69897	-2	-4.69897	1.87216	2.22884	1	-0.221849	-6.30103	-6	-7	-4	-1	-6.30103	-2.69897	-3.30103	-0.09691	-6	7.08333	0.399653	0.689954	0.0263967	0.128461	0.00698074
-0.657577	-1.69897	2.30103	2.10158	2.04336	-1.30103	0.638689	-2.69897	-1.69897	0.30103	0.30103	-1.69897	-4.69897	-1.69897	-0.69897	0.30103	-1.69897	-0.69897	-2.69897	-1.69897	0.30103	-4.69897	-2.69897	-1.69897	-0.69897	-2	-4.69897	1.87216	2.22884	1	-0.221849	-6.30103	-6	-7	-4	-1	-6.30103	-2.69897	-3.30103	-0.09691	-6	6.875	0.414578	0.665435	0.0332362	0.126822	0.00614461
-0.657577	-1.69897	2.30103	2.10158	2.04336	-1.30103	0.638689	-2.69897	-1.69897	0.30103	0.30103	-1.69897	-4.69897	-1.69897	-0.69897	0.30103	-1.69897	-0.69897	-2.69897	-1.69897	0.30103	-4.69897	-1.69897	-1.69897	-0.69897	-2	-4.69897	1.87216	2.22884	1	-0.221849	-6.30103	-6	-7	-4	-1	-6.30103	-2.69897	-3.30103	-0.09691	-6	6.66667	0.235702	0.66819	0.0152302	0.126628	0.00671849
-0.657577	-1.69897	2.30103	2.10158	2.04336	-1.30103	0.638689	-2.69897	-1.69897	0.30103	0.30103	-1.69897	-4.69897	-1.69897	-0.69897	0.30103	-1.69897	-0.69897	-2.69897	-1.69897	0.30103	-4.69897	0.30103	-1.69897	-0.69897	-2	-4.69897	1.87216	2.22884	1	-0.221849	-6.30103	-6	-7	-4	-1	-6.30103	-2.69897	-3.30103	-0.09691	-6	6.79167	0.379601	0.692364	0.0590434	0.1331	0.00676456
-0.657577	-1.69897	2.30103	2.10158	2.04336	-1.30103	0.638689	-2.69897	-1.69897	0.30103	0.30103	-1.69897	-4.69897	-1.69897	-0.69897	0.30103	-1.69897	-0.69897	-2.69897	-1.69897	0.30103	-4.69897	-0.69897	-4.69897	-0.69897	-2	-4.69897	1.87216	2.22884	1	-0.221849	-6.30103	-6	-7	-4	-1	-6.30103	-2.69897	-3.30103	-0.09691	-6	6.91667	0.276385	0.613768	0.015659	0.120294	0.00275701
-0.657577	-1.69897	2.30103	2.10158	2.04336	-1.30103	0.638689	-2.69897	-1.69897	0.30103	0.30103	-1.69897	-4.69897	-1.69897	-0.69897	0.30103	-1.69897	-0.69897	-2.69897	-1.69897	0.30103	-4.69897	-0.69897	-2.69897	-0.69897	-2	-4.69897	1.87216	2.22884	1	-0.221849	-6.30103	-6	-7	-4	-1	-6.30103	-2.69897	-3.30103	-0.09691	-6	6.83333	0.311805	0.646929	0.0356405	0.125683	0.0102127
-0.657577	-1.69897	2.30103	2.10158	2.04336	-1.30103	0.638689	-2.69897	-1.69897	0.30103	0.30103	-1.69897	-4.69897	-1.69897	-0.69897	0.30103	-1.69897	-0.69897	-2.69897	-1.69897	0.30103	-4.69897	-0.69897	-0.69897	-0.69897	-2	-4.69897	1.87216	2.22884	1	-0.221849	-6.30103	-6	-7	-4	-1	-6.30103	-2.69897	-3.30103	-0.09691	-6	6.70833	0.379601	0.635085	0.0234676	0.129822	0.00423572
-0.657577	-1.69897	2.30103	2.10158	2.04336	-1.30103	0.638689	-2.69897	-1.69897	0.30103	0.30103	-1.69897	-4.69897	-1.69897	-0.69897	0.30103	-1.69897	-0.69897	-2.69897	-1.69897	0.30103	-4.69897	-0.69897	0.30103	-0.69897	-2	-4.69897	1.87216	2.22884	1	-0.221849	-6.30103	-6	-7	-4	-1	-6.30103	-2.69897	-3.30103	-0.09691	-6	6.83333	0.372678	0.611807	0.0156386	0.133267	0.00431942
-0.657577	-1.69897	2.30103	2.10158	2.04336	-1.30103	0.638689	-2.69897	-1.69897	0.30103	0.30103	-1.69897	-4.69897	-1.69897	-0.69897	0.30103	-1.69897	-0.69897	-2.69897	-1.69897	0.30103	-4.69897	-0.69897	-1.69897	-4.69897	-2	-4.69897	1.87216	2.22884	1	-0.221849	-6.30103	-6	-7	-4	-1	-6.30103	-2.69897	-3.30103	-0.09691	-6	7.08333	0.399653	0.614887	0.022526	0.118072	0.00572431
-0.657577	-1.69897	2.30103	2.10158	2.04336	-1.30103	0.638689	-2.69897	-1.69897	0.30103	0.30103	-1.69897	-4.69897	-1.69897	-0.69897	0.30103	-1.69897	-0.69897	-2.69897	-1.69897	0.30103	-4.69897	-0.69897	-1.69897	-2.69897	-2	-4.69897	1.87216	2.22884	1	-0.221849	-6.30103	-6	-7	-4	-1	-6.30103	-2.69897	-3.30103	-0.09691	-6	6.83333	0.311805	0.617563	0.0224457	0.118878	0.00404908
-0.657577	-1.69897	2.30103	2.10158	2.04336	-1.30103	0.638689	-2.69897	-1.69897	0.30103	0.30103	-1.69897	-4.69897	-1.69897	-0.69897	0.30103	-1.69897	-0.69897	-2.69897	-1.69897	0.30103	-4.69897	-0.69897	-1.69897	-1.69897	-2	-4.69897	1.87216	2.22884	1	-0.221849	-6.30103	-6	-7	-4	-1	-6.30103	-2.69897	-3.30103	-0.09691	-6	6.75	0.25	0.644469	0.0317113	0.116933	0.00296742
-0.657577	-1.69897	2.30103	2.10158	2.04336	-1.30103	0.638689	-2.69897	-1.69897	0.30103	0.30103	-1.69897	-4.69897	-1.69897	-0.69897	0.30103	-1.69897	-0.69897	-2.69897	-1.69897	0.30103	-4.69897	-0.69897	-1.69897	0.30103	-2	-4.69897	1.87216	2.22884	1	-0.221849	-6.30103	-6	-7	-4	-1	-6.30103	-2.69897	-3.30103	-0.09691	-6	6.79167	0.320048	0.647034	0.0290018	0.128858	0.0064512
-0.657577	-1.69897	2.30103	2.10158	2.04336	-1.30103	0.638689	-2.69897	-1.69897	0.30103	0.30103	-1.69897	-4.69897	-1.69897	-0.69897	0.30103	-1.69897	-0.69897	-2.69897	-1.69897	0.30103	-4.69897	-0.69897	-1.69897	-0.69897	-5	-4.69897	1.87216	2.22884	1	-0.221849	-6.30103	-6	-7	-4	-1	-6.30103	-2.69897	-3.30103	-0.09691	-6	6.75	0.322749	0.617648	0.0177366	0.123282	0.00398067
-0.657577	-1.69897	2.30103	2.10158	2.04336	-1.30103	0.638689	-2.69897	-1.69897	0.30103	0.30103	-1.69897	-4.69897	-1.69897	-0.69897	0.30103	-1.69897	-0.69897	-2.69897	-1.69897	0.30103	-4.69897	-0.69897	-1.69897	-0.69897	-3	-4.69897	1.87216	2.22884	1	-0.221849	-6.30103	-6	-7	-4	-1	-6.30103	-2.69897	-3.30103	-0.09691	-6	6.5	0.288675	0.615856	0.0280414	0.123683	0.00331418
-0.657577	-1.69897	2.30103	2.10158	2.04336	-1.30103	0.638689	-2.69897	-1.69897	0.30103	0.30103	-1.69897	-4.69897	-1.69897	-0.69897	0.30103	-1.69897	-0.69897	-2.69897	-1.69897	0.30103	-4.69897	-0.69897	-1.69897	-0.69897	-1	-4.69897	1.87216	2.22884	1	-0.221849	-6.30103	-6	-7	-4	-1	-6.30103	-2.69897	-3.30103	-0.09691	-6	6.79167	0.320048	0.628383	0.033177	0.128822	0.00622247
-0.657577	-1.69897	2.30103	2.10158	2.04336	-1.30103	0.638689	-2.69897	-1.69897	0.30103	0.30103	-1.69897	-4.69897	-1.69897	-0.69897	0.30103	-1.69897	-0.69897	-2.69897	-1.69897	0.30103	-4.69897	-0.69897	-1.69897	-0.69897	0	-4.69897	1.87216	2.22884	1	-0.221849	-6.30103	-6	-7	-4	-1	-6.30103	-2.69897	-3.30103	-0.09691	-6	6.70833	0.379601	0.65073	0.0203665	0.131211	0.00312497
-0.657577	-1.69897	2.30103	2.10158	2.04336	-1.30103	0.638689	-2.69897	-1.69897	0.30103	0.30103	-1.69897	-4.69897	-1.69897	-0.69897	0.30103	-1.69897	-0.69897	-2.69897	-1.69897	0.30103	-4.69897	-0.69897	-1.69897	-0.69897	-2	-2.69897	1.87216	2.22884	1	-0.221849	-6.30103	-6	-7	-4	-1	-6.30103	-2.69897	-3.30103	-0.09691	-6	6.5	0.213201	0.628008	0.0173739	0.125878	0.00434471
-0.657577	-1.69897	2.30103	2.10158	2.04336	-1.30103	0.638689	-2.69897	-1.69897	0.30103	0.30103	-1.69897	-4.69897	-1.69897	-0.69897	0.30103	-1.69897	-0.69897	-2.69897	-1.69897	0.30103	-4.69897	-0.69897	-1.69897	-0.69897	-2	-1.69897	1.87216	2.22884	1	-0.221849	-6.30103	-6	-7	-4	-1	-6.30103	-2.69897	-3.30103	-0.09691	-6	6.36364	0.222681	0.638485	0.0270905	0.127572	0.00460165
-0.657577	-1.69897	2.30103	2.10158	2.04336	-1.30103	0.638689	-2.69897	-1.69897	0.30103	0.30103	-1.69897	-4.69897	-1.69897	-0.69897	0.30103	-1.69897	-0.69897	-2.69897	-1.69897	0.30103	-4.69897	-0.69897	-1.69897	-0.69897	-2	-0.69897	1.87216	2.22884	1	-0.221849	-6.30103	-6	-7	-4	-1	-6.30103	-2.69897	-3.30103	-0.09691	-6	6.125	0.360844	0.837271	0.148374	0.0816278	0.00407444
-0.657577	-1.69897	2.30103	2.10158	2.04336	-1.30103	0.638689	-2.69897	-1.69897	0.30103	0.30103	-1.69897	-4.69897	-1.69897	-0.69897	0.30103	-1.69897	-0.69897	-2.69897	-1.69897	0.30103	-4.69897	-0.69897	-1.69897	-0.69897	-2	0.30103	1.87216	2.22884	1	-0.221849	-6.30103	-6	-7	-4	-1	-6.30103	-2.69897	-3.30103	-0.09691	-6	15.6818	0.385695	0.585907	0.0962071
-0.657577	-1.69897	2.30103	2.10158	2.04336	-1.30103	0.371437	-2.69897	-1.69897	0.30103	0.30103	-1.69897	-4.69897	-1.69897	-0.69897	0.30103	-1.69897	-0.69897	-2.69897	-1.69897	0.30103	-4.69897	-0.69897	-1.69897	-0.69897	-2	-4.69897	1.86034	2.22884	1	-0.221849	-6.30103	-6	-7	-4	-1	-6.30103	-2.69897	-3.30103	-0.09691	-6	6.79167	0.379601	0.612262	0.0262997	0.124239	0.00311049
-0.657577	-1.69897	2.30103	2.10158	2.04336	-1.30103	0.375115	-2.69897	-1.69897	0.30103	0.30103	-1.69897	-4.69897	-1.69897	-0.69897	0.30103	-1.69897	-0.69897	-2.69897	-1.69897	0.30103	-4.69897	-0.69897	-1.69897	-0.69897	-2	-4.69897	1.86046	2.22884	1	-0.221849	-6.30103	-6	-7	-4	-1	-6.30103	-2.69897	-3.30103	-0.09691	-6	6.875	0.414578	0.644259	0.0275732	0.122572	0.00280693
-0.657577	-1.69897	2.30103	2.10158	2.04336	-1.30103	0.406881	-2.69897	-1.69897	0.30103	0.30103	-1.69897	-4.69897	-1.69897	-0.69897	0.30103	-1.69897	-0.69897	-2.69897	-1.69897	0.30103	-4.69897	-0.69897	-1.69897	-0.69897	-2	-4.69897	1.86153	2.22884	1	-0.221849	-6.30103	-6	-7	-4	-1	-6.30103	-2.69897	-3.30103	-0.09691	-6	6.91667	0.276385	0.627895	0.0195543	0.121767	0.00421637
-0.657577	-1.69897	2.30103	2.10158	2.04336	-1.30103	1.34932	-2.69897	-1.69897	0.30103	0.30103	-1.69897	-4.69897	-1.69897	-0.69897	0.30103	-1.69897	-0.69897	-2.69897	-1.69897	0.30103	-4.69897	-0.69897	-1.69897	-0.69897	-2	-4.69897	1.96614	2.22884	1	-0.221849	-6.30103	-6	-7	-4	-1	-6.30103	-2.69897	-3.30103	-0.09691	-6	7.08333	0.399653	0.590293	0.0205736	0.128683	0.00319758
-0.657577	-1.69897	2.30103	2.10158	2.04336	-1.30103	0.63769	-2.69897	-1.69897	0.30103	0.30103	-1.69897	-4.69897	-1.69897	-0.69897	0.30103	-1.69897	-0.69897	-2.69897	-1.69897	0.30103	-4.69897	-0.69897	-1.69897	-0.69897	-2	-4.69897	1.87216	2.22881	1	-0.221849	-6.30103	-6	-7	-4	-1	-6.30103	-2.69897	-3.30103	-0.09691	-6	6.79167	0.518746	0.624242	0.0284419	0.125878	0.0038666
-0.657577	-1.69897	2.30103	2.10158	2.04336	-1.30103	0.647579	-2.69897	-1.69897	0.30103	0.30103	-1.69897	-4.69897	-1.69897	-0.69897	0.30103	-1.69897	-0.69897	-2.69897	-1.69897	0.30103	-4.69897	-0.69897	-1.69897	-0.69897	-2	-4.69897	1.87216	2.22907	1	-0.221849	-6.30103	-6	-7	-4	-1	-6.30103	-2.69897	-3.30103	-0.09691	-6	6.70833	0.320048	0.633541	0.0109724	0.126406	0.00436412
-0.657577	-1.69897	2.30103	2.10158	2.04336	-1.30103	0.727704	-2.69897	-1.69897	0.30103	0.30103	-1.69897	-4.69897	-1.69897	-0.69897	0.30103	-1.69897	-0.69897	-2.69897	-1.69897	0.30103	-4.69897	-0.69897	-1.69897	-0.69897	-2	-4.69897	1.87216	2.23137	1	-0.221849	-6.30103	-6	-7	-4	-1	-6.30103	-2.69897	-3.30103	-0.09691	-6	6.79167	0.320048	0.648627	0.0381352	0.126739	0.00351573
-0.657577	-1.69897	2.30103	2.10158	2.04336	-1.30103	1.15661	-2.69897	-1.69897	0.30103	0.30103	-1.69897	-4.69897	-1.69897	-0.69897	0.30103	-1.69897	-0.69897	-2.69897	-1.69897	0.30103	-4.69897	-0.69897	-1.69897	-0.69897	-2	-4.69897	1.87216	2.25373	1	-0.221849	-6.30103	-6	-7	-4	-1	-6.30103	-2.69897	-3.30103	-0.09691	-6	7	0.408248	0.616668	0.0293158	0.126461	0.00230723
-0.657577	-1.69897	2.30103	2.10158	2.00217	-1.30103	0.638689	-2.69897	-1.69897	0.30103	0.30103	-1.69897	-4.69897	-1.69897	-0.69897	0.30103	-1.69897	-0.69897	-2.69897	-1.69897	0.30103	-4.69897	-0.69897	-1.69897	-0.69897	-2	-4.69897	1.87216	2.22884	-3.69897	-0.221849	-6.30103	-6	-7	-4	-1	-6.30103	-2.69897	-3.30103	-0.09691	-6	0	0	0	0	0	0
-0.657577	-1.69897	2.30103	2.10158	2.00221	-1.30103	0.638689	-2.69897	-1.69897	0.30103	0.30103	-1.69897	-4.69897	-1.69897	-0.69897	0.30103	-1.69897	-0.69897	-2.69897	-1.69897	0.30103	-4.69897	-0.69897	-1.69897	-0.69897	-2	-4.69897	1.87216	2.22884	-2	-0.221849	-6.30103	-6	-7	-4	-1	-6.30103	-2.69897	-3.30103	-0.09691	-6	7.66667	0.62361	0.572006	0.0400634	0.111517	0.0207646
-0.657577	-1.69897	2.30103	2.10158	2.0026	-1.30103	0.638689	-2.69897	-1.69897	0.30103	0.30103	-1.69897	-4.69897	-1.69897	-0.69897	0.30103	-1.69897	-0.69897	-2.69897	-1.69897	0.30103	-4.69897	-0.69897	-1.69897	-0.69897	-2	-4.69897	1.87216	2.22884	-1	-0.221849	-6.30103	-6	-7	-4	-1	-6.30103	-2.69897	-3.30103	-0.09691	-6	7.33333	0.311805	0.545314	0.0187082	0.0916556	0.00238177
-0.657577	-1.69897	2.30103	2.10158	2.00647	-1.30103	0.638689	-2.69897	-1.69897	0.30103	0.30103	-1.69897	-4.69897	-1.69897	-0.69897	0.30103	-1.69897	-0.69897	-2.69897	-1.69897	0.30103	-4.69897	-0.69897	-1.69897	-0.69897	-2	-4.69897	1.87216	2.22884	0	-0.221849	-6.30103	-6	-7	-4	-1	-6.30103	-2.69897	-3.30103	-0.09691	-6	7.20833	0.320048	0.605678	0.0178885	0.0971556	0.00243369
-0.657577	-1.69897	2.30103	2.10158	2.04336	-1.30103	0.64068	-2.69897	-1.69897	0.30103	0.30103	-1.69897	-4.69897	-1.69897	-0.69897	0.30103	-1.69897	-0.69897	-2.69897	-1.69897	0.30103	-4.69897	-0.69897	-1.69897	-0.69897	-2	-4.69897	1.87216	2.22884	1.00043	-0.221849	-6.30103	-6	-7	-4	-1	-6.30103	-2.69897	-3.30103	-0.09691	-6	7.08333	0.399653	0.607123	0.0214024	0.101239	0.00354197
-0.657577	-1.69897	2.30103	2.10158	2.04336	-1.30103	0.658202	-2.69897	-1.69897	0.30103	0.30103	-1.69897	-4.69897	-1.69897	-0.69897	0.30103	-1.69897	-0.69897	-2.69897	-1.69897	0.30103	-4.69897	-0.69897	-1.69897	-0.69897	-2	-4.69897	1.87216	2.22884	1.00432	-0.221849	-6.30103	-6	-7	-4	-1	-6.30103	-2.69897	-3.30103	-0.09691	-6	7.41667	0.399653	0.634548	0.0159632	0.102156	0.00290859
-0.657577	-1.69897	2.30103	2.10158	2.04336	-1.30103	0.80291	-2.69897	-1.69897	0.30103	0.30103	-1.69897	-4.69897	-1.69897	-0.69897	0.30103	-1.69897	-0.69897	-2.69897	-1.69897	0.30103	-4.69897	-0.69897	-1.69897	-0.69897	-2	-4.69897	1.87216	2.22884	1.04139	-0.221849	-6.30103	-6	-7	-4	-1	-6.30103	-2.69897	-3.30103	-0.09691	-6	7.16667	0.235702	0.631204	0.0162168	0.104989	0.00371267
-0.657577	-1.69897	2.30103	2.10158	2.04336	-1.30103	1.38653	-2.69897	-1.69897	0.30103	0.30103	-1.69897	-4.69897	-1.69897	-0.69897	0.30103	-1.69897	-0.69897	-2.69897	-1.69897	0.30103	-4.69897	-0.69897	-1.69897	-0.69897	-2	-4.69897	1.87216	2.22884	1.30103	-0.221849	-6.30103	-6	-7	-4	-1	-6.30103	-2.69897	-3.30103	-0.09691	-6	7.5	0	0.656115	0.0338802	0.108489	0.00178903
-0.657577	-1.69897	2.30103	2.10158	2.04336	-1.30103	0.618257	-2.69897	-1.69897	0.30103	0.30103	-1.69897	-4.69897	-1.69897	-0.69897	0.30103	-1.69897	-0.69897	-2.69897	-1.69897	0.30103	-4.69897	-0.69897	-1.69897	-0.69897	-2	-4.69897	1.87216	2.22884	1	-0.30103	-6.30103	-6	-7	-4	-1	-6.30103	-2.69897	-3.30103	-0.09691	-6	6.91667	0.343592	0.630742	0.0287288	0.126461	0.00852063
-0.657577	-1.69897	2.30103	2.10158	2.04336	-1.30103	0.618466	-2.69897	-1.69897	0.30103	0.30103	-1.69897	-4.69897	-1.69897	-0.69897	0.30103	-1.69897	-0.69897	-2.69897	-1.69897	0.30103	-4.69897	-0.69897	-1.69897	-0.69897	-2	-4.69897	1.87216	2.22884	1	-0.300162	-6.30103	-6	-7	-4	-1	-6.30103	-2.69897	-3.30103	-0.09691	-6	6.875	0.29756	0.632147	0.012849	0.121252	0.00368278
-0.657577	-1.69897	2.30103	2.10158	2.04336	-1.30103	0.620344	-2.69897	-1.69897	0.30103	0.30103	-1.69897	-4.69897	-1.69897	-0.69897	0.30103	-1.69897	-0.69897	-2.69897	-1.69897	0.30103	-4.69897	-0.69897	-1.69897	-0.69897	-2	-4.69897	1.87216	2.22884	1	-0.29243	-6.30103	-6	-7	-4	-1	-6.30103	-2.69897	-3.30103	-0.09691	-6	6.66667	0.235702	0.633903	0.0207947	0.122961	0.00328142
-0.657577	-1.69897	2.30103	2.10158	2.04336	-1.30103	0.789016	-2.69897	-1.69897	0.30103	0.30103	-1.69897	-4.69897	-1.69897	-0.69897	0.30103	-1.69897	-0.69897	-2.69897	-1.69897	0.30103	-4.69897	-0.69897	-1.69897	-0.69897	-2	-4.69897	1.87216	2.22884	1	0.176091	-6.30103	-6	-7	-4	-1	-6.30103	-2.69897	-3.30103	-0.09691	-6	6.75	0.25	0.61941	0.0213757	0.125517	0.00249861
-0.657577	-1.69897	2.30103	2.10158	2.04139	-1.30103	0.638689	-2.69897	-1.69897	0.30103	0.30103	-1.69897	-4.69897	-1.69897	-0.69897	0.30103	-1.69897	-0.69897	-2.69897	-1.69897	0.30103	-4.69897	-0.69897	-1.69897	-0.69897	-2	-4.69897	1.87216	2.22884	1	-1	-6.30103	-6	-7	-4	-1	-6.30103	-2.69897	-3.30103	-0.09691	-6	7.125	0.360844	0.595684	0.0203368	0.120878	0.00281311
-0.657577	-1.69897	2.30103	2.10158	2.04139	-1.30103	0.638689	-2.69897	-1.69897	0.30103	0.30103	-1.69897	-4.69897	-1.69897	-0.69897	0.30103	-1.69897	-0.69897	-2.69897	-1.69897	0.30103	-4.69897	-0.69897	-1.69897	-0.69897	-2	-4.69897	1.87216	2.22884	1	-0.997834	-6.30103	-6	-7	-4	-1	-6.30103	-2.69897	-3.30103	-0.09691	-6	6.70833	0.379601	0.586026	0.0326015	0.119767	0.00320012
-0.657577	-1.69897	2.30103	2.10158	2.04141	-1.30103	0.638689	-2.69897	-1.69897	0.30103	0.30103	-1.69897	-4.69897	-1.69897	-0.69897	0.30103	-1.69897	-0.69897	-2.69897	-1.69897	0.30103	-4.69897	-0.69897	-1.69897	-0.69897	-2	-4.69897	1.87216	2.22884	1	-0.978811	-6.30103	-6	-7	-4	-1	-6.30103	-2.69897	-3.30103	-0.09691	-6	6.66667	0.235702	0.600181	0.027672	0.1206	0.00341701
-0.657577	-1.69897	2.30103	2.10158	2.04159	-1.30103	0.638689	-2.69897	-1.69897	0.30103	0.30103	-1.69897	-4.69897	-1.69897	-0.69897	0.30103	-1.69897	-0.69897	-2.69897	-1.69897	0.30103	-4.69897	-0.69897	-1.69897	-0.69897	-2	-4.69897	1.87216	2.22884	1	-0.823909	-6.30103	-6	-7	-4	-1	-6.30103	-2.69897	-3.30103	-0.09691	-6	6.625	0.216506	0.652287	0.0414071	0.123585	0.0023799
-0.657577	-4.69897	2.30103	2.10158	2.04336	-1.30103	0.638689	-2.69897	-1.69897	0.30103	0.30103	-1.69897	-4.69897	-1.69897	-0.69897	0.30103	-1.69897	-0.69897	-2.69897	-1.69897	0.30103	-4.69897	-0.69897	-1.69897	-0.69897	-2	-4.69897	1.87216	2.22868	1	-0.221849	-6.30103	-6	-7	-4	-1	-6.30103	-2.69897	-3.30103	-0.09691	-6	7.25	0.433013	0.611152	0.0275573	0.122878	0.00730212
-0.657577	-2.69897	2.30103	2.10158	2.04336	-1.30103	0.638689	-2.69897	-1.69897	0.30103	0.30103	-1.69897	-4.69897	-1.69897	-0.69897	0.30103	-1.69897	-0.69897	-2.69897	-1.69897	0.30103	-4.69897	-0.69897	-1.69897	-0.69897	-2	-4.69897	1.87216	2.2287	1	-0.221849	-6.30103	-6	-7	-4	-1	-6.30103	-2.69897	-3.30103	-0.09691	-6	6.91667	0.276385	0.631681	0.0173694	0.123739	0.00505059
-0.657577	-0.69897	2.30103	2.10158	2.04336	-1.30103	0.638689	-2.69897	-1.69897	0.30103	0.30103	-1.69897	-4.69897	-1.69897	-0.69897	0.30103	-1.69897	-0.69897	-2.69897	-1.69897	0.30103	-4.69897	-0.69897	-1.69897	-0.69897	-2	-4.69897	1.87216	2.23022	1	-0.221849	-6.30103	-6	-7	-4	-1	-6.30103	-2.69897	-3.30103	-0.09691	-6	6.75	0.322749	0.628758	0.020642	0.123628	0.00401262
-0.657577	0.30103	2.30103	2.10158	2.04336	-1.30103	0.638689	-2.69897	-1.69897	0.30103	0.30103	-1.69897	-4.69897	-1.69897	-0.69897	0.30103	-1.69897	-0.69897	-2.69897	-1.69897	0.30103	-4.69897	-0.69897	-1.69897	-0.69897	-2	-4.69897	1.87216	2.24381	1	-0.221849	-6.30103	-6	-7	-4	-1	-6.30103	-2.69897	-3.30103	-0.09691	-6	7.33333	0.471405	0.64121	0.0364124	0.126044	0.00287658
-0.657577	-1.69897	2.30103	2.10158	2.04336	-3.30103	0.638689	-2.69897	-1.69897	0.30103	0.30103	-1.69897	-4.69897	-1.69897	-0.69897	0.30103	-1.69897	-0.69897	-2.69897	-1.69897	0.30103	-4.69897	-0.69897	-1.69897	-0.69897	-2	-4.69897	1.87216	2.22858	1	-0.221849	-6.30103	-6	-7	-4	-1	-6.30103	-2.69897	-3.30103	-0.09691	-6	7	0.288675	0.623158	0.028632	0.122822	0.00628466
-0.657577	-1.69897	2.30103	2.10158	2.04336	-0.30103	0.638689	-2.69897	-1.69897	0.30103	0.30103	-1.69897	-4.69897	-1.69897	-0.69897	0.30103	-1.69897	-0.69897	-2.69897	-1.69897	0.30103	-4.69897	-0.69897	-1.69897	-0.69897	-2	-4.69897	1.87216	2.23114	1	-0.221849	-6.30103	-6	-7	-4	-1	-6.30103	-2.69897	-3.30103	-0.09691	-6	7	0.288675	0.623658	0.0091358	0.127211	0.00747382
-0.657577	-1.69897	2.30103	2.10158	2.04336	0.69897	0.638689	-2.69897	-1.69897	0.30103	0.30103	-1.69897	-4.69897	-1.69897	-0.69897	0.30103	-1.69897	-0.69897	-2.69897	-1.69897	0.30103	-4.69897	-0.69897	-1.69897	-0.69897	-2	-4.69897	1.87216	2.25351	1	-0.221849	-6.30103	-6	-7	-4	-1	-6.30103	-2.69897	-3.30103	-0.09691	-6	7.20833	0.476897	0.625766	0.032737	0.123489	0.00350881
-0.657577	-1.69897	2.30103	2.10158	2.04336	1.69897	0.638689	-2.69897	-1.69897	0.30103	0.30103	-1.69897	-4.69897	-1.69897	-0.69897	0.30103	-1.69897	-0.69897	-2.69897	-1.69897	0.30103	-4.69897	-0.69897	-1.69897	-0.69897	-2	-4.69897	1.87216	2.43019	1	-0.221849	-6.30103	-6	-7	-4	-1	-6.30103	-2.69897	-3.30103	-0.09691	-6	9.04167	0.379601	0.507715	0.0185167	0.113433	0.0067151
-0.657577	-1.69897	2.30103	2.10158	2.04336	-1.30103	0.638689	-2.69897	-1.69897	0.30103	0.30103	-1.69897	-4.69897	-1.69897	-0.69897	0.30103	-1.69897	-0.69897	-2.69897	-1.69897	0.30103	-4.69897	-0.69897	-1.69897	-0.69897	-2	-4.69897	1.87216	2.22884	1	-0.221849	-4.30103	-6	-7	-4	-1	-6.30103	-2.69897	-3.30103	-0.09691	-6	7	0.408248	0.620917	0.0124002	0.126683	0.00327201
-0.657577	-1.69897	2.30103	2.10158	2.04336	-1.30103	0.638689	-2.69897	-1.69897	0.30103	0.30103	-1.69897	-4.69897	-1.69897	-0.69897	0.30103	-1.69897	-0.69897	-2.69897	-1.69897	0.30103	-4.69897	-0.69897	-1.69897	-0.69897	-2	-4.69897	1.87216	2.22884	1	-0.221849	-3.30103	-6	-7	-4	-1	-6.30103	-2.69897	-3.30103	-0.09691	-6	6.33333	0.471405	0.612029	0.0390534	0.127544	0.00441868
-0.657577	-1.69897	2.30103	2.10158	2.04338	-1.30103	0.638689	-2.69897	-1.69897	0.30103	0.30103	-1.69897	-4.69897	-1.69897	-0.69897	0.30103	-1.69897	-0.69897	-2.69897	-1.69897	0.30103	-4.69897	-0.69897	-1.69897	-0.69897	-2	-4.69897	1.87216	2.22884	1	-0.221849	-2.30103	-6	-7	-4	-1	-6.30103	-2.69897	-3.30103	-0.09691	-6	6.5	0	0.62967	0.0317448	0.126433	0.00334996
-0.657577	-1.69897	2.30103	2.10158	2.04356	-1.30103	0.638689	-2.69897	-1.69897	0.30103	0.30103	-1.69897	-4.69897	-1.69897	-0.69897	0.30103	-1.69897	-0.69897	-2.69897	-1.69897	0.30103	-4.69897	-0.69897	-1.69897	-0.69897	-2	-4.69897	1.87216	2.22884	1	-0.221849	-1.30103	-6	-7	-4	-1	-6.30103	-2.69897	-3.30103	-0.09691	-6	7.16667	0.424918	0.592802	0.0402176	0.126675	0.0068725
-0.657577	-1.69897	2.30103	2.10158	2.04336	-1.30103	0.638689	-2.69897	-1.69897	0.30103	0.30103	-1.69897	-4.69897	-1.69897	-0.69897	0.30103	-1.69897	-0.69897	-2.69897	-1.69897	0.30103	-4.69897	-0.69897	-1.69897	-0.69897	-2	-4.69897	1.87216	2.22884	1	-0.221849	-6.30103	-8	-7	-4	-1	-6.30103	-2.69897	-3.30103	-0.09691	-6	6.91667	0.343592	0.643243	0.0300667	0.128822	0.00465839
-0.657577	-1.69897	2.30103	2.10158	2.04336	-1.30103	0.638689	-2.69897	-1.69897	0.30103	0.30103	-1.69897	-4.69897	-1.69897	-0.69897	0.30103	-1.69897	-0.69897	-2.69897	-1.69897	0.30103	-4.69897	-0.69897	-1.69897	-0.69897	-2	-4.69897	1.87216	2.22884	1	-0.221849	-6.30103	-5	-7	-4	-1	-6.30103	-2.69897	-3.30103	-0.09691	-6	7	0.353553	0.661201	0.0433446	0.126767	0.0041706
-0.657577	-1.69897	2.30103	2.10158	2.04336	-1.30103	0.638689	-2.69897	-1.69897	0.30103	0.30103	-1.69897	-4.69897	-1.69897	-0.69897	0.30103	-1.69897	-0.69897	-2.69897	-1.69897	0.30103	-4.69897	-0.69897	-1.69897	-0.69897	-2	-4.69897	1.87216	2.22884	1	-0.221849	-6.30103	-4	-7	-4	-1	-6.30103	-2.69897	-3.30103	-0.09691	-6	6.54545	0.396264	0.652121	0.0339487	0.126933	0.00418662
-0.657577	-1.69897	2.30103	2.10158	2.04337	-1.30103	0.638689	-2.69897	-1.69897	0.30103	0.30103	-1.69897	-4.69897	-1.69897	-0.69897	0.30103	-1.69897	-0.69897	-2.69897	-1.69897	0.30103	-4.69897	-0.69897	-1.69897	-0.69897	-2	-4.69897	1.87216	2.22884	1	-0.221849	-6.30103	-3	-7	-4	-1	-6.30103	-2.69897	-3.30103	-0.09691	-6	6.79167	0.246503	0.645281	0.0164591	0.127128	0.00461772
-0.657577	-1.69897	2.30103	2.10158	2.04336	-1.30103	0.638689	-2.69897	-1.69897	0.30103	0.30103	-1.69897	-4.69897	-1.69897	-0.69897	0.30103	-1.69897	-0.69897	-2.69897	-1.69897	0.30103	-4.69897	-0.69897	-1.69897	-0.69897	-2	-4.69897	1.87216	2.22884	1	-0.221849	-6.30103	-6	-7	-6	-1	-6.30103	-2.69897	-3.30103	-0.09691	-6	7.08333	0.343592	0.612432	0.0200456	0.122403	0.00476828
-0.657577	-1.69897	2.30103	2.10158	2.04336	-1.30103	0.638689	-2.69897	-1.69897	0.30103	0.30103	-1.69897	-4.69897	-1.69897	-0.69897	0.30103	-1.69897	-0.69897	-2.69897	-1.69897	0.30103	-4.69897	-0.69897	-1.69897	-0.69897	-2	-4.69897	1.87216	2.22884	1	-0.221849	-6.30103	-6	-7	-3	-1	-6.30103	-2.69897	-3.30103	-0.09691	-6	6.83333	0.235702	0.625863	0.021722	0.123072	0.00352362
-0.657577	-1.69897	2.30103	2.10158	2.04336	-1.30103	0.638689	-2.69897	-1.69897	0.30103	0.30103	-1.69897	-4.69897	-1.69897	-0.69897	0.30103	-1.69897	-0.69897	-2.69897	-1.69897	0.30103	-4.69897	-0.69897	-1.69897	-0.69897	-2	-4.69897	1.87216	2.22889	1	-0.221849	-6.30103	-6	-7	-2	-1	-6.30103	-2.69897	-3.30103	-0.09691	-6	6.91667	0.399653	0.619073	0.0125863	0.124433	0.00208611
-0.657577	-1.69897	2.30103	2.10158	2.04336	-1.30103	0.638689	-2.69897	-1.69897	0.30103	0.30103	-1.69897	-4.69897	-1.69897	-0.69897	0.30103	-1.69897	-0.69897	-2.69897	-1.69897	0.30103	-4.69897	-0.69897	-1.69897	-0.69897	-2	-4.69897	1.87216	2.22935	1	-0.221849	-6.30103	-6	-7	-1	-1	-6.30103	-2.69897	-3.30103	-0.09691	-6	7.08333	0.399653	0.61441	0.0092095	0.126267	0.00344668
-0.657577	-1.69897	2.30103	2.10158	2.04336	-1.30103	0.638689	-2.69897	-1.69897	0.30103	0.30103	-1.69897	-4.69897	-1.69897	-0.69897	0.30103	-1.69897	-0.69897	-2.69897	-1.69897	0.30103	-4.69897	-0.69897	-1.69897	-0.69897	-2	-4.69897	1.87216	2.22884	1	-0.221849	-6.30103	-6	-5	-4	-1	-6.30103	-2.69897	-3.30103	-0.09691	-6	6.625	0.414578	0.642045	0.0260076	0.124544	0.00426079
-0.657577	-1.69897	2.30103	2.10158	2.04336	-1.30103	0.638689	-2.69897	-1.69897	0.30103	0.30103	-1.69897	-4.69897	-1.69897	-0.69897	0.30103	-1.69897	-0.69897	-2.69897	-1.69897	0.30103	-4.69897	-0.69897	-1.69897	-0.69897	-2	-4.69897	1.87216	2.22884	1	-0.221849	-6.30103	-6	-4	-4	-1	-6.30103	-2.69897	-3.30103	-0.09691	-6	6.875	0.414578	0.630447	0.0228254	0.125878	0.00543366
-0.657577	-1.69897	2.30103	2.10158	2.04337	-1.30103	0.638689	-2.69897	-1.69897	0.30103	0.30103	-1.69897	-4.69897	-1.69897	-0.69897	0.30103	-1.69897	-0.69897	-2.69897	-1.69897	0.30103	-4.69897	-0.69897	-1.69897	-0.69897	-2	-4.69897	1.87216	2.22884	1	-0.221849	-6.30103	-6	-3	-4	-1	-6.30103	-2.69897	-3.30103	-0.09691	-6	6.54167	0.320048	0.62545	0.0265247	0.124378	0.00341249
-0.657577	-1.69897	2.30103	2.10158	2.0434	-1.30103	0.638689	-2.69897	-1.69897	0.30103	0.30103	-1.69897	-4.69897	-1.69897	-0.69897	0.30103	-1.69897	-0.69897	-2.69897	-1.69897	0.30103	-4.69897	-0.69897	-1.69897	-0.69897	-2	-4.69897	1.87216	2.22884	1	-0.221849	-6.30103	-6	-2	-4	-1	-6.30103	-2.69897	-3.30103	-0.09691	-6	6.66667	0.372678	0.629855	0.0197116	0.125711	0.00385821
-0.657577	-1.69897	2.30103	2.10158	2.04336	-1.30103	0.628593	-2.69897	-1.69897	0.30103	0.30103	-1.69897	-4.69897	-1.69897	-0.69897	0.30103	-1.69897	-0.69897	-2.69897	-1.69897	0.30103	-4.69897	-0.69897	-1.69897	-0.69897	-2	-4.69897	1.87216	2.22884	1	-0.221849	-6.30103	-6	-7	-4	-6	-6.30103	-2.69897	-3.30103	-0.09691	-6	7.16667	0.513701	0.60645	0.0273317	0.126156	0.00202225
-0.657577	-1.69897	2.30103	2.10158	2.04336	-1.30103	0.628603	-2.69897	-1.69897	0.30103	0.30103	-1.69897	-4.69897	-1.69897	-0.69897	0.30103	-1.69897	-0.69897	-2.69897	-1.69897	0.30103	-4.69897	-0.69897	-1.69897	-0.69897	-2	-4.69897	1.87216	2.22884	1	-0.221849	-6.30103	-6	-7	-4	-4	-6.30103	-2.69897	-3.30103	-0.09691	-6	7	0.408248	0.630917	0.0377971	0.124342	0.00404293
-0.657577	-1.69897	2.30103	2.10158	2.04336	-1.30103	0.628695	-2.69897	-1.69897	0.30103	0.30103	-1.69897	-4.69897	-1.69897	-0.69897	0.30103	-1.69897	-0.69897	-2.69897	-1.69897	0.30103	-4.69897	-0.69897	-1.69897	-0.69897	-2	-4.69897	1.87216	2.22884	1	-0.221849	-6.30103	-6	-7	-4	-3	-6.30103	-2.69897	-3.30103	-0.09691	-6	6.86364	0.222681	0.607335	0.0142865	0.124567	0.00310984
-0.657577	-1.69897	2.30103	2.10158	2.04336	-1.30103	0.629613	-2.69897	-1.69897	0.30103	0.30103	-1.69897	-4.69897	-1.69897	-0.69897	0.30103	-1.69897	-0.69897	-2.69897	-1.69897	0.30103	-4.69897	-0.69897	-1.69897	-0.69897	-2	-4.69897	1.87216	2.22884	1	-0.221849	-6.30103	-6	-7	-4	-2	-6.30103	-2.69897	-3.30103	-0.09691	-6	6.75	0.322749	0.619476	0.0209704	0.125517	0.00289356
-0.657577	-1.69897	2.30103	2.10158	2.04336	-1.30103	0.638689	-2.69897	-1.69897	0.30103	0.30103	-1.69897	-4.69897	-1.69897	-0.69897	0.30103	-1.69897	-0.69897	-2.69897	-1.69897	0.30103	-4.69897	-0.69897	-1.69897	-0.69897	-2	-4.69897	1.87216	2.22884	1	-0.221849	-6.30103	-6	-7	-4	-1	-6.30103	-5.69897	-3.30103	-0.09691	-6	7.25	0.520416	0.613457	0.0244421	0.128128	0.00334569
-0.657577	-1.69897	2.30103	2.10158	2.04336	-1.30103	0.638689	-2.69897	-1.69897	0.30103	0.30103	-1.69897	-4.69897	-1.69897	-0.69897	0.30103	-1.69897	-0.69897	-2.69897	-1.69897	0.30103	-4.69897	-0.69897	-1.69897	-0.69897	-2	-4.69897	1.87216	2.22884	1	-0.221849	-6.30103	-6	-7	-4	-1	-6.30103	-3.69897	-3.30103	-0.09691	-6	7.125	0.360844	0.635909	0.0268556	0.125572	0.00654678
-0.657577	-1.69897	2.30103	2.10158	2.04336	-1.30103	0.638689	-2.69897	-1.69897	0.30103	0.30103	-1.69897	-4.69897	-1.69897	-0.69897	0.30103	-1.69897	-0.69897	-2.69897	-1.69897	0.30103	-4.69897	-0.69897	-1.69897	-0.69897	-2	-4.69897	1.87216	2.22884	1	-0.221849	-6.30103	-6	-7	-4	-1	-6.30103	-1.69897	-3.30103	-0.09691	-6	6.95833	0.379601	0.630175	0.019206	0.129282	0.00276473
-0.657577	-1.69897	2.30103	2.10158	2.04336	-1.30103	0.638689	-2.69897	-1.69897	0.30103	0.30103	-1.69897	-4.69897	-1.69897	-0.69897	0.30103	-1.69897	-0.69897	-2.69897	-1.69897	0.30103	-4.69897	-0.69897	-1.69897	-0.69897	-2	-4.69897	1.87216	2.22884	1	-0.221849	-6.30103	-6	-7	-4	-1	-6.30103	-0.69897	-3.30103	-0.09691	-6	7.04167	0.431003	0.637662	0.0277168	0.127239	0.00155431
-0.657577	-1.69897	2.30103	2.10158	2.04336	-1.30103	0.638689	-2.69897	-1.69897	0.30103	0.30103	-1.69897	-4.69897	-1.69897	-0.69897	0.30103	-1.69897	-0.69897	-2.69897	-1.69897	0.30103	-4.69897	-0.69897	-1.69897	-0.69897	-2	-4.69897	1.87216	2.22884	1	-0.221849	-6.30103	-6	-7	-4	-1	-6.30103	-2.69897	-7.30103	-0.09691	-6	6.83333	0.372678	0.640869	0.0170251	0.122517	0.00290952
-0.657577	-1.69897	2.30103	2.10158	2.04336	-1.30103	0.638689	-2.69897	-1.69897	0.30103	0.30103	-1.69897	-4.69897	-1.69897	-0.69897	0.30103	-1.69897	-0.69897	-2.69897	-1.69897	0.30103	-4.69897	-0.69897	-1.69897	-0.69897	-2	-4.69897	1.87216	2.22884	1	-0.221849	-6.30103	-6	-7	-4	-1	-6.30103	-2.69897	-5.30103	-0.09691	-6	6.875	0.29756	0.632319	0.0160373	0.126544	0.00692598
-0.657577	-1.69897	2.30103	2.10158	2.04336	-1.30103	0.638689	-2.69897	-1.69897	0.30103	0.30103	-1.69897	-4.69897	-1.69897	-0.69897	0.30103	-1.69897	-0.69897	-2.69897	-1.69897	0.30103	-4.69897	-0.69897	-1.69897	-0.69897	-2	-4.69897	1.87216	2.22884	1	-0.221849	-6.30103	-6	-7	-4	-1	-6.30103	-2.69897	-4.30103	-0.09691	-6	6.54167	0.246503	0.62688	0.0211089	0.122878	0.00442914
-0.657577	-1.69897	2.30103	2.10158	2.04336	-1.30103	0.638689	-2.69897	-1.69897	0.30103	0.30103	-1.69897	-4.69897	-1.69897	-0.69897	0.30103	-1.69897	-0.69897	-2.69897	-1.69897	0.30103	-4.69897	-0.69897	-1.69897	-0.69897	-2	-4.69897	1.87216	2.22884	1	-0.221849	-6.30103	-6	-7	-4	-1	-6.30103	-2.69897	-2.30103	-0.09691	-6	6.875	0.414578	0.62225	0.0222812	0.1236	0.00427633
-0.657577	-1.69897	2.30103	2.10158	2.04336	-1.30103	0.638689	-2.69897	-1.69897	0.30103	0.30103	-1.69897	-4.69897	-1.69897	-0.69897	0.30103	-1.69897	-0.69897	-2.69897	-1.69897	0.30103	-4.69897	-0.69897	-1.69897	-0.69897	-2	-4.69897	1.87216	2.22884	1	-0.221849	-6.30103	-6	-7	-4	-1	-4.30103	-2.69897	-3.30103	-0.09691	-6	6.79167	0.379601	0.620536	0.0574626	0.124342	0.00460413
-0.657577	-1.69897	2.30103	2.10158	2.04336	-1.30103	0.638689	-2.69897	-1.69897	0.30103	0.30103	-1.69897	-4.69897	-1.69897	-0.69897	0.30103	-1.69897	-0.69897	-2.69897	-1.69897	0.30103	-4.69897	-0.69897	-1.69897	-0.69897	-2	-4.69897	1.87216	2.22884	1	-0.221849	-6.30103	-6	-7	-4	-1	-3.30103	-2.69897	-3.30103	-0.09691	-6	7.04167	0.379601	0.623431	0.0261239	0.125017	0.00318016
-0.657577	-1.69897	2.30103	2.10158	2.04336	-1.30103	0.638689	-2.69897	-1.69897	0.30103	0.30103	-1.69897	-4.69897	-1.69897	-0.69897	0.30103	-1.69897	-0.69897	-2.69897	-1.69897	0.30103	-4.69897	-0.69897	-1.69897	-0.69897	-2	-4.69897	1.87216	2.22884	1	-0.221849	-6.30103	-6	-7	-4	-1	-2.30103	-2.69897	-3.30103	-0.09691	-6	8.75	0.322749	0.650436	0.0424241	0.120794	0.00204332
-0.657577	-1.69897	2.30103	2.10158	2.04336	-1.30103	0.638689	-2.69897	-1.69897	0.30103	0.30103	-1.69897	-4.69897	-1.69897	-0.69897	0.30103	-1.69897	-0.69897	-2.69897	-1.69897	0.30103	-4.69897	-0.69897	-1.69897	-0.69897	-2	-4.69897	1.87216	2.22884	1	-0.221849	-6.30103	-6	-7	-4	-1	-1.30103	-2.69897	-3.30103	-0.09691	-6	18.25	0.629153	0.723051	0.143199
-0.657577	-1.69897	2.30103	2.10158	2.04336	-1.30103	0.638689	-2.69897	-1.69897	0.30103	0.30103	-1.69897	-4.69897	-1.69897	-0.69897	0.30103	-1.69897	-0.69897	-2.69897	-1.69897	0.30103	-4.69897	-0.69897	-1.69897	-0.69897	-2	-4.69897	1.87216	2.22884	1	-0.221849	-6.30103	-6	-7	-4	-1	-6.30103	-2.69897	-3.30103	-5.09691	-6	6.54167	0.379601	0.614983	0.0187356	0.122461	0.0039662
-0.657577	-1.69897	2.30103	2.10158	2.04336	-1.30103	0.638689	-2.69897	-1.69897	0.30103	0.30103	-1.69897	-4.69897	-1.69897	-0.69897	0.30103	-1.69897	-0.69897	-2.69897	-1.69897	0.30103	-4.69897	-0.69897	-1.69897	-0.69897	-2	-4.69897	1.87216	2.22884	1	-0.221849	-6.30103	-6	-7	-4	-1	-6.30103	-2.69897	-3.30103	-3.09691	-6	6.875	0.360844	0.635617	0.023376	0.123544	0.00438079
-0.657577	-1.69897	2.30103	2.10158	2.04336	-1.30103	0.638689	-2.69897	-1.69897	0.30103	0.30103	-1.69897	-4.69897	-1.69897	-0.69897	0.30103	-1.69897	-0.69897	-2.69897	-1.69897	0.30103	-4.69897	-0.69897	-1.69897	-0.69897	-2	-4.69897	1.87216	2.22884	1	-0.221849	-6.30103	-6	-7	-4	-1	-6.30103	-2.69897	-3.30103	-2.09691	-6	6.75	0.322749	0.614239	0.010844	0.121544	0.00401694
-0.657577	-1.69897	2.30103	2.10158	2.04336	-1.30103	0.638689	-2.69897	-1.69897	0.30103	0.30103	-1.69897	-4.69897	-1.69897	-0.69897	0.30103	-1.69897	-0.69897	-2.69897	-1.69897	0.30103	-4.69897	-0.69897	-1.69897	-0.69897	-2	-4.69897	1.87216	2.22884	1	-0.221849	-6.30103	-6	-7	-4	-1	-6.30103	-2.69897	-3.30103	-1.09691	-6	6.66667	0.424918	0.624067	0.0231252	0.123961	0.00302293
-0.657577	-1.69897	2.30103	2.10158	2.04336	-1.30103	0.638689	-2.69897	-1.69897	0.30103	0.30103	-1.69897	-4.69897	-1.69897	-0.69897	0.30103	-1.69897	-0.69897	-2.69897	-1.69897	0.30103	-4.69897	-0.69897	-1.69897	-0.69897	-2	-4.69897	1.87216	2.22884	1	-0.221849	-6.30103	-6	-7	-4	-1	-6.30103	-2.69897	-3.30103	-0.09691	-4	6.83333	0.372678	0.631107	0.0316576	0.123758	0.00480266
-0.657577	-1.69897	2.30103	2.10158	2.04336	-1.30103	0.638689	-2.69897	-1.69897	0.30103	0.30103	-1.69897	-4.69897	-1.69897	-0.69897	0.30103	-1.69897	-0.69897	-2.69897	-1.69897	0.30103	-4.69897	-0.69897	-1.69897	-0.69897	-2	-4.69897	1.87216	2.22884	1	-0.221849	-6.30103	-6	-7	-4	-1	-6.30103	-2.69897	-3.30103	-0.09691	-3	6.79167	0.379601	0.624526	0.0223603	0.12735	0.00505731
-0.657577	-1.69897	2.30103	2.10158	2.04336	-1.30103	0.638689	-2.69897	-1.69897	0.30103	0.30103	-1.69897	-4.69897	-1.69897	-0.69897	0.30103	-1.69897	-0.69897	-2.69897	-1.69897	0.30103	-4.69897	-0.69897	-1.69897	-0.69897	-2	-4.69897	1.87216	2.22884	1	-0.221849	-6.30103	-6	-7	-4	-1	-6.30103	-2.69897	-3.30103	-0.09691	-2	6.83333	0.424918	0.655312	0.0742663	0.136267	0.0100549
-0.657577	-1.69897	2.30103	2.10158	2.04336	-1.30103	0.638689	-2.69897	-1.69897	0.30103	0.30103	-1.69897	-4.69897	-1.69897	-0.69897	0.30103	-1.69897	-0.69897	-2.69897	-1.69897	0.30103	-4.69897	-0.69897	-1.69897	-0.69897	-2	-4.69897	1.87216	2.22884	1	-0.221849	-6.30103	-6	-7	-4	-1	-6.30103	-2.69897	-3.30103	-0.09691	-1	7.375	0.360844	0.365886	0.0198053	0.0962389	0.00264385
0.30103	-1.74036	0.477121	1.72723	0.0399942	-0.30103	0.194388	-1.74036	-1.74036	-1.74036	-1.74036	-1.74036	-1.74036	-1.74036	-1.74036	-1.74036	-1.74036	-1.74036	-1.74036	-1.74036	-1.74036	-1.74036	-1.74036	-1.74036	-1.74036	-2.04139	-1.74036	1.05326	1.93322	-0.740363	-1.85106	-3.34242	-5.04139	-4.04139	-3.04139	-3.04139	-3.30103	-2.74036	-4.30103	-2.1383	-3.04139	0	0	0	0	0	0
0.30103	-1.74036	0.477121	1.92454	0.0399942	-0.30103	0.194388	-1.74036	-1.74036	-1.74036	-1.74036	-1.74036	-1.74036	-1.74036	-1.74036	-1.74036	-1.74036	-1.74036	-1.74036	-1.74036	-1.74036	-1.74036	-1.74036	-1.74036	-1.74036	-2.04139	-1.74036	1.86143	1.93322	-0.740363	-1.85106	-3.34242	-5.04139	-4.04139	-3.04139	-3.04139	-3.30103	-2.74036	-4.30103	-2.1383	-3.04139	5.5	0	1.15549	0.0813268	0.256128	0.00197886
0.30103	-1.74036	0.477121	2.05994	0.0399942	-0.30103	0.194388	-1.74036	-1.74036	-1.74036	-1.74036	-1.74036	-1.74036	-1.74036	-1.74036	-1.74036	-1.74036	-1.74036	-1.74036	-1.74036	-1.74036	-1.74036	-1.74036	-1.74036	-1.74036	-2.04139	-1.74036	2.12769	1.93322	-0.740363	-1.85106	-3.34242	-5.04139	-4.04139	-3.04139	-3.04139	-3.30103	-2.74036	-4.30103	-2.1383	-3.04139	5.52778	0.357352	1.16395	0.0898666	0.260331	0.0100196
0.30103	-1.74036	0.477121	2.16301	0.0399942	-0.30103	0.194388	-1.74036	-1.74036	-1.74036	-1.74036	-1.74036	-1.74036	-1.74036	-1.74036	-1.74036	-1.74036	-1.74036	-1.74036	-1.74036	-1.74036	-1.74036	-1.74036	-1.74036	-1.74036	-2.04139	-1.74036	2.29155	1.93322	-0.740363	-1.85106	-3.34242	-5.04139	-4.04139	-3.04139	-3.04139	-3.30103	-2.74036	-4.30103	-2.1383	-3.04139	5.95833	0.246503	1.15458	0.0878843	0.236794	0.0102066
0.30103	-1.74036	0.477121	2.24625	0.0399942	-0.30103	0.194388	-1.74036	-1.74036	-1.74036	-1.74036	-1.74036	-1.74036	-1.74036	-1.74036	-1.74036	-1.74036	-1.74036	-1.74036	-1.74036	-1.74036	-1.74036	-1.74036	-1.74036	-1.74036	-2.04139	-1.74036	2.41024	1.93322	-0.740363	-1.85106	-3.34242	-5.04139	-4.04139	-3.04139	-3.04139	-3.30103	-2.74036	-4.30103	-2.1383	-3.04139	6.29167	0.518746	1.13615	0.0689741	0.317711	0.0631931
0.30103	-1.74036	0.477121	2.01636	0.0399942	-0.30103	0.194388	-1.74036	-1.74036	-1.74036	-1.74036	-1.74036	-1.74036	-1.74036	-1.74036	-1.74036	-1.74036	-1.74036	-1.74036	-1.74036	-1.74036	-1.74036	-1.74036	-1.74036	-1.74036	-2.04139	-1.74036	2.09068	1.93322	-0.740363	-1.85106	-3.34242	-5.04139	-4.04139	-3.04139	-3.04139	-3.30103	-2.74036	-4.30103	-2.1383	-3.04139	5.33333	0.372678	1.19002	0.121381	0.261267	0.00432799
0.30103	-1.74036	0.477121	2.09968	0.0399942	-0.30103	0.194388	-1.74036	-1.74036	-1.74036	-1.74036	-1.74036	-1.74036	-1.74036	-1.74036	-1.74036	-1.74036	-1.74036	-1.74036	-1.74036	-1.74036	-1.74036	-1.74036	-1.74036	-1.74036	-2.04139	-1.74036	2.16191	1.93322	-0.740363	-1.85106	-3.34242	-5.04139	-4.04139	-3.04139	-3.04139	-3.30103	-2.74036	-4.30103	-2.1383	-3.04139	5.375	0.360844	1.12782	0.0863986	0.259683	0.00264269
0.30103	-1.74036	0.477121	2.1532	0.0399942	-0.30103	0.194388	-1.74036	-1.74036	-1.74036	-1.74036	-1.74036	-1.74036	-1.74036	-1.74036	-1.74036	-1.74036	-1.74036	-1.74036	-1.74036	-1.74036	-1.74036	-1.74036	-1.74036	-1.74036	-2.04139	-1.74036	2.20866	1.93322	-0.740363	-1.85106	-3.34242	-5.04139	-4.04139	-3.04139	-3.04139	-3.30103	-2.74036	-4.30103	-2.1383	-3.04139	5.58333	0.276385	1.1652	0.110961	0.255285	0.00146659
0.30103	-1.74036	0.477121	2.2572	0.0399942	-0.30103	0.194388	-1.74036	-1.74036	-1.74036	-1.74036	-1.74036	-1.74036	-1.74036	-1.74036	-1.74036	-1.74036	-1.74036	-1.74036	-1.74036	-1.74036	-1.74036	-1.74036	-1.74036	-1.74036	-2.04139	-1.74036	2.30142	1.93322	-0.740363	-1.85106	-3.34242	-5.04139	-4.04139	-3.04139	-3.04139	-3.30103	-2.74036	-4.30103	-2.1383	-3.04139	5.625	0.29756	1.22596	0.0662847	0.267961	0.0124234
0.30103	-1.74036	0.477121	1.86034	0.0399942	-0.30103	0.194388	-1.74036	-1.74036	-1.74036	-1.74036	-1.74036	-1.74036	-1.74036	-1.74036	-1.74036	-1.74036	-1.74036	-1.74036	-1.74036	-1.74036	-1.74036	-1.74036	-1.74036	-1.74036	-2.04139	-1.74036	2.12769	0.0596667	-0.740363	-1.85106	-3.34242	-5.04139	-4.04139	-3.04139	-3.04139	-3.30103	-2.74036	-4.30103	-2.1383	-3.04139	5.41667	0.343592	1.21867	0.115722	0.276683	0.0540317
0.30103	-1.74036	0.477121	1.97151	0.0399942	-0.30103	0.194388	-1.74036	-1.74036	-1.74036	-1.74036	-1.74036	-1.74036	-1.74036	-1.74036	-1.74036	-1.74036	-1.74036	-1.74036	-1.74036	-1.74036	-1.74036	-1.74036	-1.74036	-1.74036	-2.04139	-1.74036	2.12769	1.63796	-0.740363	-1.85106	-3.34242	-5.04139	-4.04139	-3.04139	-3.04139	-3.30103	-2.74036	-4.30103	-2.1383	-3.04139	5.375	0.29756	1.17288	0.145002	0.267239	0.023117
0.30103	-1.74036	0.477121	2.13338	0.0399942	-0.30103	0.194388	-1.74036	-1.74036	-1.74036	-1.74036	-1.74036	-1.74036	-1.74036	-1.74036	-1.74036	-1.74036	-1.74036	-1.74036	-1.74036	-1.74036	-1.74036	-1.74036	-1.74036	-1.74036	-2.04139	-1.74036	2.12769	2.10737	-0.740363	-1.85106	-3.34242	-5.04139	-4.04139	-3.04139	-3.04139	-3.30103	-2.74036	-4.30103	-2.1383	-3.04139	5.625	0.29756	1.15518	0.102183	0.2596	0.00617567
0.30103	-1.74036	0.477121	2.19618	0.0399942	-0.30103	0.194388	-1.74036	-1.74036	-1.74036	-1.74036	-1.74036	-1.74036	-1.74036	-1.74036	-1.74036	-1.74036	-1.74036	-1.74036	-1.74036	-1.74036	-1.74036	-1.74036	-1.74036	-1.74036	-2.04139	-1.74036	2.12769	2.23134	-0.740363	-1.85106	-3.34242	-5.04139	-4.04139	-3.04139	-3.04139	-3.30103	-2.74036	-4.30103	-2.1383	-3.04139	5.83333	0.235702	1.15045	0.0584906	0.256294	0.00239389
-1.69897	-1.74036	0.477121	2.05994	0.0399942	-0.30103	0.194388	-1.74036	-1.74036	-1.74036	-1.74036	-1.74036	-1.74036	-1.74036	-1.74036	-1.74036	-1.74036	-1.74036	-1.74036	-1.74036	-1.74036	-1.74036	-1.74036	-1.74036	-1.74036	-2.04139	-1.74036	2.12769	1.93322	-0.740363	-1.85106	-3.34242	-5.04139	-4.04139	-3.04139	-3.04139	-3.30103	-2.74036	-4.30103	-2.1383	-3.04139	6.58333	0.399653	0.937871	0.0540617	0.0796833	0.0020052
-0.657577	-1.74036	0.477121	2.05994	0.0399942	-0.30103	0.194388	-1.74036	-1.74036	-1.74036	-1.74036	-1.74036	-1.74036	-1.74036	-1.74036	-1.74036	-1.74036	-1.74036	-1.74036	-1.74036	-1.74036	-1.74036	-1.74036	-1.74036	-1.74036	-2.04139	-1.74036	2.12769	1.93322	-0.740363	-1.85106	-3.34242	-5.04139	-4.04139	-3.04139	-3.04139	-3.30103	-2.74036	-4.30103	-2.1383	-3.04139	5.45833	0.320048	1.22865	0.0911803	0.097403	0.00168448
1.30103	-1.74036	0.477121	2.05994	0.0399942	-0.30103	0.194388	-1.74036	-1.74036	-1.74036	-1.74036	-1.74036	-1.74036	-1.74036	-1.74036	-1.74036	-1.74036	-1.74036	-1.74036	-1.74036	-1.74036	-1.74036	-1.74036	-1.74036	-1.74036	-2.04139	-1.74036	2.12769	1.93322	-0.740363	-1.85106	-3.34242	-5.04139	-4.04139	-3.04139	-3.04139	-3.30103	-2.74036	-4.30103	-2.1383	-3.04139	5.5	0.353553	1.09606	0.0735195
2.30103	-1.74036	0.477121	2.05994	0.0399942	-0.30103	0.194388	-1.74036	-1.74036	-1.74036	-1.74036	-1.74036	-1.74036	-1.74036	-1.74036	-1.74036	-1.74036	-1.74036	-1.74036	-1.74036	-1.74036	-1.74036	-1.74036	-1.74036	-1.74036	-2.04139	-1.74036	2.12769	1.93322	-0.740363	-1.85106	-3.34242	-5.04139	-4.04139	-3.04139	-3.04139	-3.30103	-2.74036	-4.30103	-2.1383	-3.04139	5.79167	0.246503	1.10872	0.183238
0.30103	-1.74036	0.0128372	2.05994	-0.952867	-0.30103	0.194388	-1.74036	-1.74036	-1.74036	-1.74036	-1.74036	-1.74036	-1.74036	-1.74036	-1.74036	-1.74036	-1.74036	-1.74036	-1.74036	-1.74036	-1.74036	-1.74036	-1.74036	-1.74036	-2.04139	-1.74036	2.12769	1.93322	-0.740363	-1.85106	-3.34242	-5.04139	-4.04139	-3.04139	-3.04139	-3.30103	-2.74036	-4.30103	-2.1383	-3.04139	5.5	0.204124	1.21266	0.0963122	0.251039	0.0636064
0.30103	-1.74036	0.0899051	2.05994	-0.674764	-0.30103	0.194388	-1.74036	-1.74036	-1.74036	-1.74036	-1.74036	-1.74036	-1.74036	-1.74036	-1.74036	-1.74036	-1.74036	-1.74036	-1.74036	-1.74036	-1.74036	-1.74036	-1.74036	-1.74036	-2.04139	-1.74036	2.12769	1.93322	-0.740363	-1.85106	-3.34242	-5.04139	-4.04139	-3.04139	-3.04139	-3.30103	-2.74036	-4.30103	-2.1383	-3.04139	5.66667	0.235702	1.11035	0.0660305	0.222767	0.0215374
0.30103	-1.74036	1.32222	2.05994	1.00417	-0.30103	0.194388	-1.74036	-1.74036	-1.74036	-1.74036	-1.74036	-1.74036	-1.74036	-1.74036	-1.74036	-1.74036	-1.74036	-1.74036	-1.74036	-1.74036	-1.74036	-1.74036	-1.74036	-1.74036	-2.04139	-1.74036	2.12769	1.93322	-0.740363	-1.85106	-3.34242	-5.04139	-4.04139	-3.04139	-3.04139	-3.30103	-2.74036	-4.30103	-2.1383	-3.04139	5.16667	0.235702	1.21811	0.0676104	0.26785	0.00514624
0.30103	-1.74036	2.3032	2.05994	2.00042	-0.30103	0.194388	-1.74036	-1.74036	-1.74036	-1.74036	-1.74036	-1.74036	-1.74036	-1.74036	-1.74036	-1.74036	-1.74036	-1.74036	-1.74036	-1.74036	-1.74036	-1.74036	-1.74036	-1.74036	-2.04139	-1.74036	2.12769	1.93322	-0.740363	-1.85106	-3.34242	-5.04139	-4.04139	-3.04139	-3.04139	-3.30103	-2.74036	-4.30103	-2.1383	-3.04139	5.79167	0.246503	1.09878	0.091649	0.247128	0.00805934
0.30103	-1.74036	0.30103	2.05994	0.0399942	-0.30103	-0.248301	-1.74036	-1.74036	-1.74036	-1.74036	-1.74036	-1.74036	-1.74036	-1.74036	-1.74036	-1.74036	-1.74036	-1.74036	-1.74036	-1.74036	-1.74036	-1.74036	-1.74036	-1.74036	-2.04139	-1.74036	2.12769	1.93322	-0.740363	-1.85106	-3.34242	-5.04139	-4.04139	-3.04139	-3.04139	-3.30103	-2.74036	-4.30103	-2.1383	-3.04139	5.70833	0.320048	1.18559	0.0946868	0.255628	0.0108427
0.30103	-1.74036	0.322219	2.05994	0.0399942	-0.30103	-0.177475	-1.74036	-1.74036	-1.74036	-1.74036	-1.74036	-1.74036	-1.74036	-1.74036	-1.74036	-1.74036	-1.74036	-1.74036	-1.74036	-1.74036	-1.74036	-1.74036	-1.74036	-1.74036	-2.04139	-1.74036	2.12769	1.93322	-0.740363	-1.85106	-3.34242	-5.04139	-4.04139	-3.04139	-3.04139	-3.30103	-2.74036	-4.30103	-2.1383	-3.04139	5.58333	0.343592	1.15166	0.101526	0.26335	0.011304
0.30103	-1.74036	1.07918	2.05994	0.0399942	-0.30103	1.02385	-1.74036	-1.74036	-1.74036	-1.74036	-1.74036	-1.74036	-1.74036	-1.74036	-1.74036	-1.74036	-1.74036	-1.74036	-1.74036	-1.74036	-1.74036	-1.74036	-1.74036	-1.74036	-2.04139	-1.74036	2.12769	1.93322	-0.740363	-1.85106	-3.34242	-5.04139	-4.04139	-3.04139	-3.04139	-3.30103	-2.74036	-4.30103	-2.1383	-3.04139	5.25	0.25	1.18908	0.0808911	0.264156	0.00333565
0.30103	-1.74036	2.0086	2.05994	0.0399942	-0.30103	2.00244	-1.74036	-1.74036	-1.74036	-1.74036	-1.74036	-1.74036	-1.74036	-1.74036	-1.74036	-1.74036	-1.74036	-1.74036	-1.74036	-1.74036	-1.74036	-1.74036	-1.74036	-1.74036	-2.04139	-1.74036	2.12769	1.93322	-0.740363	-1.85106	-3.34242	-5.04139	-4.04139	-3.04139	-3.04139	-3.30103	-2.74036	-4.30103	-2.1383	-3.04139	5.45833	0.246503	1.19878	0.0823916	0.278906	0.0055033
0.30103	-1.74036	0.477121	2.05994	0.0399942	-0.30103	0.194388	-4.69897	-1.74036	-1.74036	-1.74036	-1.74036	-1.74036	-1.74036	-1.74036	-1.74036	-1.74036	-1.74036	-1.74036	-1.74036	-1.74036	-1.74036	-1.74036	-1.74036	-1.74036	-2.04139	-1.74036	2.12769	1.93322	-0.740363	-1.85106	-3.34242	-5.04139	-4.04139	-3.04139	-3.04139	-3.30103	-2.74036	-4.30103	-2.1383	-3.04139	5.5	0.288675	1.16974	0.114353	0.249555	0.00202146
0.30103	-1.74036	0.477121	2.05994	0.0399942	-0.30103	0.194388	-2.78176	-1.74036	-1.74036	-1.74036	-1.74036	-1.74036	-1.74036	-1.74036	-1.74036	-1.74036	-1.74036	-1.74036	-1.74036	-1.74036	-1.74036	-1.74036	-1.74036	-1.74036	-2.04139	-1.74036	2.12769	1.93322	-0.740363	-1.85106	-3.34242	-5.04139	-4.04139	-3.04139	-3.04139	-3.30103	-2.74036	-4.30103	-2.1383	-3.04139	5.45833	0.320048	1.21676	0.153757	0.254572	0.0105361
0.30103	-1.74036	0.477121	2.05994	0.0399942	-0.30103	0.194388	-0.69897	-1.74036	-1.74036	-1.74036	-1.74036	-1.74036	-1.74036	-1.74036	-1.74036	-1.74036	-1.74036	-1.74036	-1.74036	-1.74036	-1.74036	-1.74036	-1.74036	-1.74036	-2.04139	-1.74036	2.12769	1.93322	-0.740363	-1.85106	-3.34242	-5.04139	-4.04139	-3.04139	-3.04139	-3.30103	-2.74036	-4.30103	-2.1383	-3.04139	5.29167	0.320048	1.21953	0.100519	0.254711	0.00780056
0.30103	-1.74036	0.477121	2.05994	0.0399942	-0.30103	0.194388	0.30103	-1.74036	-1.74036	-1.74036	-1.74036	-1.74036	-1.74036	-1.74036	-1.74036	-1.74036	-1.74036	-1.74036	-1.74036	-1.74036	-1.74036	-1.74036	-1.74036	-1.74036	-2.04139	-1.74036	2.12769	1.93322	-0.740363	-1.85106	-3.34242	-5.04139	-4.04139	-3.04139	-3.04139	-3.30103	-2.74036	-4.30103	-2.1383	-3.04139	5.375	0.216506	1.07642	0.0775293	0.305461	0.00528355
0.30103	-1.74036	0.477121	2.05994	0.0399942	-0.30103	0.189312	-1.74036	-4.69897	-1.74036	-1.74036	-1.74036	-1.74036	-1.74036	-1.74036	-1.74036	-1.74036	-1.74036	-1.74036	-1.74036	-1.74036	-1.74036	-1.74036	-1.74036	-1.74036	-2.04139	-1.74036	2.12769	1.93322	-0.740363	-1.85106	-3.34242	-5.04139	-4.04139	-3.04139	-3.04139	-3.30103	-2.74036	-4.30103	-2.1383	-3.04139	5.29167	0.320048	1.09035	0.110166	0.257739	0.00942559
0.30103	-1.74036	0.477121	2.05994	0.0399942	-0.30103	0.189776	-1.74036	-2.78176	-1.74036	-1.74036	-1.74036	-1.74036	-1.74036	-1.74036	-1.74036	-1.74036	-1.74036	-1.74036	-1.74036	-1.74036	-1.74036	-1.74036	-1.74036	-1.74036	-2.04139	-1.74036	2.12769	1.93322	-0.740363	-1.85106	-3.34242	-5.04139	-4.04139	-3.04139	-3.04139	-3.30103	-2.74036	-4.30103	-2.1383	-3.04139	5.20833	0.246503	1.09443	0.149366	0.258211	0.00560313
0.30103	-1.74036	0.477121	2.05994	0.0399942	-0.30103	0.242135	-1.74036	-0.69897	-1.74036	-1.74036	-1.74036	-1.74036	-1.74036	-1.74036	-1.74036	-1.74036	-1.74036	-1.74036	-1.74036	-1.74036	-1.74036	-1.74036	-1.74036	-1.74036	-2.04139	-1.74036	2.12769	1.93322	-0.740363	-1.85106	-3.34242	-5.04139	-4.04139	-3.04139	-3.04139	-3.30103	-2.74036	-4.30103	-2.1383	-3.04139	5.375	0.462106	1.17935	0.115907	0.273425	0.00647651
0.30103	-1.74036	0.477121	2.05994	0.0399942	-0.30103	0.549783	-1.74036	0.30103	-1.74036	-1.74036	-1.74036	-1.74036	-1.74036	-1.74036	-1.74036	-1.74036	-1.74036	-1.74036	-1.74036	-1.74036	-1.74036	-1.74036	-1.74036	-1.74036	-2.04139	-1.74036	2.12769	1.93322	-0.740363	-1.85106	-3.34242	-5.04139	-4.04139	-3.04139	-3.04139	-3.30103	-2.74036	-4.30103	-2.1383	-3.04139	5.375	0.29756	1.13949	0.0877043	0.283017	0.0134082
0.30103	-1.74036	0.477121	2.05994	0.0399942	-0.30103	0.194388	-1.74036	-1.74036	-4.69897	-1.74036	-1.74036	-1.74036	-1.74036	-1.74036	-1.74036	-1.74036	-1.74036	-1.74036	-1.74036	-1.74036	-1.74036	-1.74036	-1.74036	-1.74036	-2.04139	-1.74036	2.12769	1.93322	-0.740363	-1.85106	-3.34242	-5.04139	-4.04139	-3.04139	-3.04139	-3.30103	-2.74036	-4.30103	-2.1383	-3.04139	5.625	0.360844	1.15313	0.0955518	0.252403	0.00232011
0.30103	-1.74036	0.477121	2.05994	0.0399942	-0.30103	0.194388	-1.74036	-1.74036	-2.78176	-1.74036	-1.74036	-1.74036	-1.74036	-1.74036	-1.74036	-1.74036	-1.74036	-1.74036	-1.74036	-1.74036	-1.74036	-1.74036	-1.74036	-1.74036	-2.04139	-1.74036	2.12769	1.93322	-0.740363	-1.85106	-3.34242	-5.04139	-4.04139	-3.04139	-3.04139	-3.30103	-2.74036	-4.30103	-2.1383	-3.04139	5.66667	0.235702	1.26814	0.165194	0.254878	0.00291653
0.30103	-1.74036	0.477121	2.05994	0.0399942	-0.30103	0.194388	-1.74036	-1.74036	-0.69897	-1.74036	-1.74036	-1.74036	-1.74036	-1.74036	-1.74036	-1.74036	-1.74036	-1.74036	-1.74036	-1.74036	-1.74036	-1.74036	-1.74036	-1.74036	-2.04139	-1.74036	2.12769	1.93322	-0.740363	-1.85106	-3.34242	-5.04139	-4.04139	-3.04139	-3.04139	-3.30103	-2.74036	-4.30103	-2.1383	-3.04139	5.58333	0.186339	1.10655	0.0575269	0.272183	0.00375185
0.30103	-1.74036	0.477121	2.05994	0.0399942	-0.30103	0.194388	-1.74036	-1.74036	0.30103	-1.74036	-1.74036	-1.74036	-1.74036	-1.74036	-1.74036	-1.74036	-1.74036	-1.74036	-1.74036	-1.74036	-1.74036	-1.74036	-1.74036	-1.74036	-2.04139	-1.74036	2.12769	1.93322	-0.740363	-1.85106	-3.34242	-5.04139	-4.04139	-3.04139	-3.04139	-3.30103	-2.74036	-4.30103	-2.1383	-3.04139	5.66667	0.311805	1.15174	0.0940323	0.273406	0.00301065
0.30103	-1.74036	0.477121	2.05994	0.0399942	-0.30103	0.194388	-1.74036	-1.74036	-1.74036	-4.69897	-1.74036	-1.74036	-1.74036	-1.74036	-1.74036	-1.74036	-1.74036	-1.74036	-1.74036	-1.74036	-1.74036	-1.74036	-1.74036	-1.74036	-2.04139	-1.74036	2.12769	1.93322	-0.740363	-1.85106	-3.34242	-5.04139	-4.04139	-3.04139	-3.04139	-3.30103	-2.74036	-4.30103	-2.1383	-3.04139	8.04167	0.320048	1.0278	0.0789282	0.260467	0.0110206
0.30103	-1.74036	0.477121	2.05994	0.0399942	-0.30103	0.194388	-1.74036	-1.74036	-1.74036	-2.78176	-1.74036	-1.74036	-1.74036	-1.74036	-1.74036	-1.74036	-1.74036	-1.74036	-1.74036	-1.74036	-1.74036	-1.74036	-1.74036	-1.74036	-2.04139	-1.74036	2.12769	1.93322	-0.740363	-1.85106	-3.34242	-5.04139	-4.04139	-3.04139	-3.04139	-3.30103	-2.74036	-4.30103	-2.1383	-3.04139	7.41667	0.343592	1.10247	0.0824859	0.248406	0.0115048
0.30103	-1.74036	0.477121	2.05994	0.0399942	-0.30103	0.194388	-1.74036	-1.74036	-1.74036	-0.69897	-1.74036	-1.74036	-1.74036	-1.74036	-1.74036	-1.74036	-1.74036	-1.74036	-1.74036	-1.74036	-1.74036	-1.74036	-1.74036	-1.74036	-2.04139	-1.74036	2.12769	1.93322	-0.740363	-1.85106	-3.34242	-5.04139	-4.04139	-3.04139	-3.04139	-3.30103	-2.74036	-4.30103	-2.1383	-3.04139	4.875	0.29756	1.42199	0.22326	0.265794	0.00329831
0.30103	-1.74036	0.477121	2.05994	0.0399942	-0.30103	0.194388	-1.74036	-1.74036	-1.74036	0.30103	-1.74036	-1.74036	-1.74036	-1.74036	-1.74036	-1.74036	-1.74036	-1.74036	-1.74036	-1.74036	-1.74036	-1.74036	-1.74036	-1.74036	-2.04139	-1.74036	2.12769	1.93322	-0.740363	-1.85106	-3.34242	-5.04139	-4.04139	-3.04139	-3.04139	-3.30103	-2.74036	-4.30103	-2.1383	-3.04139	4.79167	0.246503	1.38655	0.177702	0.351294	0.013006
0.30103	-1.74036	0.477121	2.05994	0.0399942	-0.30103	0.189312	-1.74036	-1.74036	-1.74036	-1.74036	-4.69897	-1.74036	-1.74036	-1.74036	-1.74036	-1.74036	-1.74036	-1.74036	-1.74036	-1.74036	-1.74036	-1.74036	-1.74036	-1.74036	-2.04139	-1.74036	2.12769	1.93322	-0.740363	-1.85106	-3.34242	-5.04139	-4.04139	-3.04139	-3.04139	-3.30103	-2.74036	-4.30103	-2.1383	-3.04139	5.45833	0.320048	1.20797	0.173155	0.248555	0.00340016
0.30103	-1.74036	0.477121	2.05994	0.0399942	-0.30103	0.189776	-1.74036	-1.74036	-1.74036	-1.74036	-2.78176	-1.74036	-1.74036	-1.74036	-1.74036	-1.74036	-1.74036	-1.74036	-1.74036	-1.74036	-1.74036	-1.74036	-1.74036	-1.74036	-2.04139	-1.74036	2.12769	1.93322	-0.740363	-1.85106	-3.34242	-5.04139	-4.04139	-3.04139	-3.04139	-3.30103	-2.74036	-4.30103	-2.1383	-3.04139	5.54167	0.320048	1.14401	0.0762035	0.250676	0.00312724
0.30103	-1.74036	0.477121	2.05994	0.0399942	-0.30103	0.242135	-1.74036	-1.74036	-1.74036	-1.74036	-0.69897	-1.74036	-1.74036	-1.74036	-1.74036	-1.74036	-1.74036	-1.74036	-1.74036	-1.74036	-1.74036	-1.74036	-1.74036	-1.74036	-2.04139	-1.74036	2.12769	1.93322	-0.740363	-1.85106	-3.34242	-5.04139	-4.04139	-3.04139	-3.04139	-3.30103	-2.74036	-4.30103	-2.1383	-3.04139	6.25	0.25	1.0702	0.0954699	0.230989	0.0140642
0.30103	-1.74036	0.477121	2.05994	0.0399942	-0.30103	0.549783	-1.74036	-1.74036	-1.74036	-1.74036	0.30103	-1.74036	-1.74036	-1.74036	-1.74036	-1.74036	-1.74036	-1.74036	-1.74036	-1.74036	-1.74036	-1.74036	-1.74036	-1.74036	-2.04139	-1.74036	2.12769	1.93322	-0.740363	-1.85106	-3.34242	-5.04139	-4.04139	-3.04139	-3.04139	-3.30103	-2.74036	-4.30103	-2.1383	-3.04139	8.83333	0.513701	0.841355	0.0583567	0.2253	0.00104563
0.30103	-1.74036	0.477121	2.05994	0.0399942	-0.30103	0.189312	-1.74036	-1.74036	-1.74036	-1.74036	-1.74036	-4.69897	-1.74036	-1.74036	-1.74036	-1.74036	-1.74036	-1.74036	-1.74036	-1.74036	-1.74036	-1.74036	-1.74036	-1.74036	-2.04139	-1.74036	2.12769	1.93322	-0.740363	-1.85106	-3.34242	-5.04139	-4.04139	-3.04139	-3.04139	-3.30103	-2.74036	-4.30103	-2.1383	-3.04139	5.29167	0.320048	1.21826	0.0884426	0.259572	0.0104451
0.30103	-1.74036	0.477121	2.05994	0.0399942	-0.30103	0.189776	-1.74036	-1.74036	-1.74036	-1.74036	-1.74036	-2.78176	-1.74036	-1.74036	-1.74036	-1.74036	-1.74036	-1.74036	-1.74036	-1.74036	-1.74036	-1.74036	-1.74036	-1.74036	-2.04139	-1.74036	2.12769	1.93322	-0.740363	-1.85106	-3.34242	-5.04139	-4.04139	-3.04139	-3.04139	-3.30103	-2.74036	-4.30103	-2.1383	-3.04139	5.08333	0.343592	1.20838	0.0703671	0.264072	0.0147551
0.30103	-1.74036	0.477121	2.05994	0.0399942	-0.30103	0.242135	-1.74036	-1.74036	-1.74036	-1.74036	-1.74036	-0.69897	-1.74036	-1.74036	-1.74036	-1.74036	-1.74036	-1.74036	-1.74036	-1.74036	-1.74036	-1.74036	-1.74036	-1.74036	-2.04139	-1.74036	2.12769	1.93322	-0.740363	-1.85106	-3.34242	-5.04139	-4.04139	-3.04139	-3.04139	-3.30103	-2.74036	-4.30103	-2.1383	-3.04139	6.95833	0.431003	1.07286	0.0880653	0.244494	0.0144752
0.30103	-1.74036	0.477121	2.05994	0.0399942	-0.30103	0.549783	-1.74036	-1.74036	-1.74036	-1.74036	-1.74036	0.30103	-1.74036	-1.74036	-1.74036	-1.74036	-1.74036	-1.74036	-1.74036	-1.74036	-1.74036	-1.74036	-1.74036	-1.74036	-2.04139	-1.74036	2.12769	1.93322	-0.740363	-1.85106	-3.34242	-5.04139	-4.04139	-3.04139	-3.04139	-3.30103	-2.74036	-4.30103	-2.1383	-3.04139	7.40909	0.192847	1.09773	0.137117	0.315555	0.0305569
0.30103	-1.69897	0.477121	1.72723	0.043602	-0.30103	0.209783	-1.69897	-1.69897	-1.69897	-1.69897	-1.69897	-1.69897	-1.69897	-1.69897	-1.69897	-1.69897	-1.69897	-1.69897	-1.69897	-1.69897	-1.69897	-1.69897	-1.69897	-1.69897	-2	-1.69897	1.05396	1.93329	-0.69897	-1.82391	-3.30103	-5	-4	-3	-3	-3.30103	-2.69897	-4.30103	-2.09691	-3	0	0	0	0	0	0
0.30103	-1.69897	0.477121	1.92454	0.043602	-0.30103	0.209783	-1.69897	-1.69897	-1.69897	-1.69897	-1.69897	-1.69897	-1.69897	-1.69897	-1.69897	-1.69897	-1.69897	-1.69897	-1.69897	-1.69897	-1.69897	-1.69897	-1.69897	-1.69897	-2	-1.69897	1.86153	1.93329	-0.69897	-1.82391	-3.30103	-5	-4	-3	-3	-3.30103	-2.69897	-4.30103	-2.09691	-3	5.25	0.25	1.26188	0.0850577	0.250489	0.00168233
0.30103	-1.69897	0.477121	2.16301	0.043602	-0.30103	0.209783	-1.69897	-1.69897	-1.69897	-1.69897	-1.69897	-1.69897	-1.69897	-1.69897	-1.69897	-1.69897	-1.69897	-1.69897	-1.69897	-1.69897	-1.69897	-1.69897	-1.69897	-1.69897	-2	-1.69897	2.29159	1.93329	-0.69897	-1.82391	-3.30103	-5	-4	-3	-3	-3.30103	-2.69897	-4.30103	-2.09691	-3	5.66667	0.552771	1.22332	0.112849	0.479433	0.189973
0.30103	-1.69897	0.477121	2.24625	0.043602	-0.30103	0.209783	-1.69897	-1.69897	-1.69897	-1.69897	-1.69897	-1.69897	-1.69897	-1.69897	-1.69897	-1.69897	-1.69897	-1.69897	-1.69897	-1.69897	-1.69897	-1.69897	-1.69897	-1.69897	-2	-1.69897	2.41027	1.93329	-0.69897	-1.82391	-3.30103	-5	-4	-3	-3	-3.30103	-2.69897	-4.30103	-2.09691	-3	6.16667	0.471405	1.06096	0.0581722	0.229767	0.0081172
0.30103	-1.69897	0.477121	1.86034	0.043602	-0.30103	0.209783	-1.69897	-1.69897	-1.69897	-1.69897	-1.69897	-1.69897	-1.69897	-1.69897	-1.69897	-1.69897	-1.69897	-1.69897	-1.69897	-1.69897	-1.69897	-1.69897	-1.69897	-1.69897	-2	-1.69897	2.12775	0.0652061	-0.69897	-1.82391	-3.30103	-5	-4	-3	-3	-3.30103	-2.69897	-4.30103	-2.09691	-3	5.5	0.408248	1.09966	0.0422733	0.246906	0.0283374
0.30103	-1.69897	0.477121	1.97151	0.043602	-0.30103	0.209783	-1.69897	-1.69897	-1.69897	-1.69897	-1.69897	-1.69897	-1.69897	-1.69897	-1.69897	-1.69897	-1.69897	-1.69897	-1.69897	-1.69897	-1.69897	-1.69897	-1.69897	-1.69897	-2	-1.69897	2.12775	1.63811	-0.69897	-1.82391	-3.30103	-5	-4	-3	-3	-3.30103	-2.69897	-4.30103	-2.09691	-3	5.20833	0.320048	1.20061	0.102942	0.311628	0.0619558
0.30103	-1.69897	0.477121	2.13338	0.043602	-0.30103	0.209783	-1.69897	-1.69897	-1.69897	-1.69897	-1.69897	-1.69897	-1.69897	-1.69897	-1.69897	-1.69897	-1.69897	-1.69897	-1.69897	-1.69897	-1.69897	-1.69897	-1.69897	-1.69897	-2	-1.69897	2.12775	2.10742	-0.69897	-1.82391	-3.30103	-5	-4	-3	-3	-3.30103	-2.69897	-4.30103	-2.09691	-3	5.54167	0.246503	1.12211	0.0533166	0.259822	0.0116554
0.30103	-1.69897	0.477121	2.19618	0.043602	-0.30103	0.209783	-1.69897	-1.69897	-1.69897	-1.69897	-1.69897	-1.69897	-1.69897	-1.69897	-1.69897	-1.69897	-1.69897	-1.69897	-1.69897	-1.69897	-1.69897	-1.69897	-1.69897	-1.69897	-2	-1.69897	2.12775	2.23137	-0.69897	-1.82391	-3.30103	-5	-4	-3	-3	-3.30103	-2.69897	-4.30103	-2.09691	-3	5.875	0.462106	1.10564	0.0316896	0.280044	0.0309411
-1.69897	-1.69897	0.477121	2.05994	0.043602	-0.30103	0.209783	-1.69897	-1.69897	-1.69897	-1.69897	-1.69897	-1.69897	-1.69897	-1.69897	-1.69897	-1.69897	-1.69897	-1.69897	-1.69897	-1.69897	-1.69897	-1.69897	-1.69897	-1.69897	-2	-1.69897	2.12775	1.93329	-0.69897	-1.82391	-3.30103	-5	-4	-3	-3	-3.30103	-2.69897	-4.30103	-2.09691	-3	6.25	0.322749	1.00298	0.0359179	0.0868273	0.00395382
-0.657577	-1.69897	0.477121	2.05994	0.043602	-0.30103	0.209783	-1.69897	-1.69897	-1.69897	-1.69897	-1.69897	-1.69897	-1.69897	-1.69897	-1.69897	-1.69897	-1.69897	-1.69897	-1.69897	-1.69897	-1.69897	-1.69897	-1.69897	-1.69897	-2	-1.69897	2.12775	1.93329	-0.69897	-1.82391	-3.30103	-5	-4	-3	-3	-3.30103	-2.69897	-4.30103	-2.09691	-3	5.5	0.353553	1.12458	0.0898547	0.103615	0.00218518
1.30103	-1.69897	0.477121	2.05994	0.043602	-0.30103	0.209783	-1.69897	-1.69897	-1.69897	-1.69897	-1.69897	-1.69897	-1.69897	-1.69897	-1.69897	-1.69897	-1.69897	-1.69897	-1.69897	-1.69897	-1.69897	-1.69897	-1.69897	-1.69897	-2	-1.69897	2.12775	1.93329	-0.69897	-1.82391	-3.30103	-5	-4	-3	-3	-3.30103	-2.69897	-4.30103	-2.09691	-3	5.33333	0.235702	1.15169	0.101521
2.30103	-1.69897	0.477121	2.05994	0.043602	-0.30103	0.209783	-1.69897	-1.69897	-1.69897	-1.69897	-1.69897	-1.69897	-1.69897	-1.69897	-1.69897	-1.69897	-1.69897	-1.69897	-1.69897	-1.69897	-1.69897	-1.69897	-1.69897	-1.69897	-2	-1.69897	2.12775	1.93329	-0.69897	-1.82391	-3.30103	-5	-4	-3	-3	-3.30103	-2.69897	-4.30103	-2.09691	-3	5.95833	0.379601	1.06076	0.111713	0.435767	0
0.30103	-1.69897	0.0128372	2.05994	-0.918617	-0.30103	0.209783	-1.69897	-1.69897	-1.69897	-1.69897	-1.69897	-1.69897	-1.69897	-1.69897	-1.69897	-1.69897	-1.69897	-1.69897	-1.69897	-1.69897	-1.69897	-1.69897	-1.69897	-1.69897	-2	-1.69897	2.12775	1.93329	-0.69897	-1.82391	-3.30103	-5	-4	-3	-3	-3.30103	-2.69897	-4.30103	-2.09691	-3	5.70833	0.320048	1.12006	0.0480535	0.2663	0.0712882
0.30103	-1.69897	0.0899051	2.05994	-0.656375	-0.30103	0.209783	-1.69897	-1.69897	-1.69897	-1.69897	-1.69897	-1.69897	-1.69897	-1.69897	-1.69897	-1.69897	-1.69897	-1.69897	-1.69897	-1.69897	-1.69897	-1.69897	-1.69897	-1.69897	-2	-1.69897	2.12775	1.93329	-0.69897	-1.82391	-3.30103	-5	-4	-3	-3	-3.30103	-2.69897	-4.30103	-2.09691	-3	5.79167	0.320048	1.07986	0.0546392	0.249039	0.0417892
0.30103	-1.69897	1.32222	2.05994	1.00456	-0.30103	0.209783	-1.69897	-1.69897	-1.69897	-1.69897	-1.69897	-1.69897	-1.69897	-1.69897	-1.69897	-1.69897	-1.69897	-1.69897	-1.69897	-1.69897	-1.69897	-1.69897	-1.69897	-1.69897	-2	-1.69897	2.12775	1.93329	-0.69897	-1.82391	-3.30103	-5	-4	-3	-3	-3.30103	-2.69897	-4.30103	-2.09691	-3	5.33333	0.372678	1.19874	0.0971527	0.264378	0.00937178
0.30103	-1.69897	2.3032	2.05994	2.00046	-0.30103	0.209783	-1.69897	-1.69897	-1.69897	-1.69897	-1.69897	-1.69897	-1.69897	-1.69897	-1.69897	-1.69897	-1.69897	-1.69897	-1.69897	-1.69897	-1.69897	-1.69897	-1.69897	-1.69897	-2	-1.69897	2.12775	1.93329	-0.69897	-1.82391	-3.30103	-5	-4	-3	-3	-3.30103	-2.69897	-4.30103	-2.09691	-3	6.08333	0.343592	1.09549	0.0379799	0.243489	0.0140974
0.30103	-1.69897	0.30103	2.05994	0.043602	-0.30103	-0.206908	-1.69897	-1.69897	-1.69897	-1.69897	-1.69897	-1.69897	-1.69897	-1.69897	-1.69897	-1.69897	-1.69897	-1.69897	-1.69897	-1.69897	-1.69897	-1.69897	-1.69897	-1.69897	-2	-1.69897	2.12775	1.93329	-0.69897	-1.82391	-3.30103	-5	-4	-3	-3	-3.30103	-2.69897	-4.30103	-2.09691	-3	5.54167	0.246503	1.1262	0.0579714	0.266572	0.0268678
0.30103	-1.69897	0.322219	2.05994	0.043602	-0.30103	-0.142065	-1.69897	-1.69897	-1.69897	-1.69897	-1.69897	-1.69897	-1.69897	-1.69897	-1.69897	-1.69897	-1.69897	-1.69897	-1.69897	-1.69897	-1.69897	-1.69897	-1.69897	-1.69897	-2	-1.69897	2.12775	1.93329	-0.69897	-1.82391	-3.30103	-5	-4	-3	-3	-3.30103	-2.69897	-4.30103	-2.09691	-3	5.54167	0.246503	1.13172	0.0561042	0.25835	0.0114108
0.30103	-1.69897	1.07918	2.05994	0.043602	-0.30103	1.02617	-1.69897	-1.69897	-1.69897	-1.69897	-1.69897	-1.69897	-1.69897	-1.69897	-1.69897	-1.69897	-1.69897	-1.69897	-1.69897	-1.69897	-1.69897	-1.69897	-1.69897	-1.69897	-2	-1.69897	2.12775	1.93329	-0.69897	-1.82391	-3.30103	-5	-4	-3	-3	-3.30103	-2.69897	-4.30103	-2.09691	-3	5.29167	0.320048	1.24893	0.129014	0.262322	0.00310416
0.30103	-1.69897	2.0086	2.05994	0.043602	-0.30103	2.00269	-1.69897	-1.69897	-1.69897	-1.69897	-1.69897	-1.69897	-1.69897	-1.69897	-1.69897	-1.69897	-1.69897	-1.69897	-1.69897	-1.69897	-1.69897	-1.69897	-1.69897	-1.69897	-2	-1.69897	2.12775	1.93329	-0.69897	-1.82391	-3.30103	-5	-4	-3	-3	-3.30103	-2.69897	-4.30103	-2.09691	-3	5.54167	0.320048	1.15253	0.0982979	0.279739	0.0134436
0.30103	-1.69897	0.477121	2.05994	0.043602	-0.30103	0.209783	-4.69897	-1.69897	-1.69897	-1.69897	-1.69897	-1.69897	-1.69897	-1.69897	-1.69897	-1.69897	-1.69897	-1.69897	-1.69897	-1.69897	-1.69897	-1.69897	-1.69897	-1.69897	-2	-1.69897	2.12775	1.93329	-0.69897	-1.82391	-3.30103	-5	-4	-3	-3	-3.30103	-2.69897	-4.30103	-2.09691	-3	5.33333	0.235702	1.24379	0.136358	0.365367	0.111221
0.30103	-1.69897	0.477121	2.05994	0.043602	-0.30103	0.209783	-2.69897	-1.69897	-1.69897	-1.69897	-1.69897	-1.69897	-1.69897	-1.69897	-1.69897	-1.69897	-1.69897	-1.69897	-1.69897	-1.69897	-1.69897	-1.69897	-1.69897	-1.69897	-2	-1.69897	2.12775	1.93329	-0.69897	-1.82391	-3.30103	-5	-4	-3	-3	-3.30103	-2.69897	-4.30103	-2.09691	-3	5.375	0.29756	1.19198	0.0807176	0.312711	0.0791345
0.30103	-1.69897	0.477121	2.05994	0.043602	-0.30103	0.209783	-0.69897	-1.69897	-1.69897	-1.69897	-1.69897	-1.69897	-1.69897	-1.69897	-1.69897	-1.69897	-1.69897	-1.69897	-1.69897	-1.69897	-1.69897	-1.69897	-1.69897	-1.69897	-2	-1.69897	2.12775	1.93329	-0.69897	-1.82391	-3.30103	-5	-4	-3	-3	-3.30103	-2.69897	-4.30103	-2.09691	-3	5.125	0.29756	1.23276	0.0707269	0.261979	0.0123936
0.30103	-1.69897	0.477121	2.05994	0.043602	-0.30103	0.209783	0.30103	-1.69897	-1.69897	-1.69897	-1.69897	-1.69897	-1.69897	-1.69897	-1.69897	-1.69897	-1.69897	-1.69897	-1.69897	-1.69897	-1.69897	-1.69897	-1.69897	-1.69897	-2	-1.69897	2.12775	1.93329	-0.69897	-1.82391	-3.30103	-5	-4	-3	-3	-3.30103	-2.69897	-4.30103	-2.09691	-3	4.95833	0.320048	1.13452	0.161825	0.307489	0.0105575
0.30103	-1.69897	0.477121	2.05994	0.043602	-0.30103	0.204391	-1.69897	-4.69897	-1.69897	-1.69897	-1.69897	-1.69897	-1.69897	-1.69897	-1.69897	-1.69897	-1.69897	-1.69897	-1.69897	-1.69897	-1.69897	-1.69897	-1.69897	-1.69897	-2	-1.69897	2.12775	1.93329	-0.69897	-1.82391	-3.30103	-5	-4	-3	-3	-3.30103	-2.69897	-4.30103	-2.09691	-3	5.29167	0.246503	1.08869	0.17375	0.2711	0.0324286
0.30103	-1.69897	0.477121	2.05994	0.043602	-0.30103	0.204934	-1.69897	-2.69897	-1.69897	-1.69897	-1.69897	-1.69897	-1.69897	-1.69897	-1.69897	-1.69897	-1.69897	-1.69897	-1.69897	-1.69897	-1.69897	-1.69897	-1.69897	-1.69897	-2	-1.69897	2.12775	1.93329	-0.69897	-1.82391	-3.30103	-5	-4	-3	-3	-3.30103	-2.69897	-4.30103	-2.09691	-3	5.08333	0.343592	1.19978	0.104598	0.34935	0.0759752
0.30103	-1.69897	0.477121	2.05994	0.043602	-0.30103	0.255514	-1.69897	-0.69897	-1.69897	-1.69897	-1.69897	-1.69897	-1.69897	-1.69897	-1.69897	-1.69897	-1.69897	-1.69897	-1.69897	-1.69897	-1.69897	-1.69897	-1.69897	-1.69897	-2	-1.69897	2.12775	1.93329	-0.69897	-1.82391	-3.30103	-5	-4	-3	-3	-3.30103	-2.69897	-4.30103	-2.09691	-3	5.08333	0.276385	1.1956	0.119295	0.311544	0.0482266
0.30103	-1.69897	0.477121	2.05994	0.043602	-0.30103	0.556423	-1.69897	0.30103	-1.69897	-1.69897	-1.69897	-1.69897	-1.69897	-1.69897	-1.69897	-1.69897	-1.69897	-1.69897	-1.69897	-1.69897	-1.69897	-1.69897	-1.69897	-1.69897	-2	-1.69897	2.12775	1.93329	-0.69897	-1.82391	-3.30103	-5	-4	-3	-3	-3.30103	-2.69897	-4.30103	-2.09691	-3	5.25	0.322749	1.13553	0.109857	0.281572	0.0157495
0.30103	-1.69897	0.477121	2.05994	0.043602	-0.30103	0.209783	-1.69897	-1.69897	-4.69897	-1.69897	-1.69897	-1.69897	-1.69897	-1.69897	-1.69897	-1.69897	-1.69897	-1.69897	-1.69897	-1.69897	-1.69897	-1.69897	-1.69897	-1.69897	-2	-1.69897	2.12775	1.93329	-0.69897	-1.82391	-3.30103	-5	-4	-3	-3	-3.30103	-2.69897	-4.30103	-2.09691	-3	5.33333	0.372678	1.1597	0.0884725	0.265656	0.0369217
0.30103	-1.69897	0.477121	2.05994	0.043602	-0.30103	0.209783	-1.69897	-1.69897	-2.69897	-1.69897	-1.69897	-1.69897	-1.69897	-1.69897	-1.69897	-1.69897	-1.69897	-1.69897	-1.69897	-1.69897	-1.69897	-1.69897	-1.69897	-1.69897	-2	-1.69897	2.12775	1.93329	-0.69897	-1.82391	-3.30103	-5	-4	-3	-3	-3.30103	-2.69897	-4.30103	-2.09691	-3	5.33333	0.372678	1.17201	0.0865945	0.262489	0.0228274
0.30103	-1.69897	0.477121	2.05994	0.043602	-0.30103	0.209783	-1.69897	-1.69897	-0.69897	-1.69897	-1.69897	-1.69897	-1.69897	-1.69897	-1.69897	-1.69897	-1.69897	-1.69897	-1.69897	-1.69897	-1.69897	-1.69897	-1.69897	-1.69897	-2	-1.69897	2.12775	1.93329	-0.69897	-1.82391	-3.30103	-5	-4	-3	-3	-3.30103	-2.69897	-4.30103	-2.09691	-3	5.25	0.25	1.15185	0.0727569	0.265044	0.00752998
0.30103	-1.69897	0.477121	2.05994	0.043602	-0.30103	0.209783	-1.69897	-1.69897	0.30103	-1.69897	-1.69897	-1.69897	-1.69897	-1.69897	-1.69897	-1.69897	-1.69897	-1.69897	-1.69897	-1.69897	-1.69897	-1.69897	-1.69897	-1.69897	-2	-1.69897	2.12775	1.93329	-0.69897	-1.82391	-3.30103	-5	-4	-3	-3	-3.30103	-2.69897	-4.30103	-2.09691	-3	5.29167	0.246503	1.17731	0.0883953	0.276191	0.018538
0.30103	-1.69897	0.477121	2.05994	0.043602	-0.30103	0.209783	-1.69897	-1.69897	-1.69897	-4.69897	-1.69897	-1.69897	-1.69897	-1.69897	-1.69897	-1.69897	-1.69897	-1.69897	-1.69897	-1.69897	-1.69897	-1.69897	-1.69897	-1.69897	-2	-1.69897	2.12775	1.93329	-0.69897	-1.82391	-3.30103	-5	-4	-3	-3	-3.30103	-2.69897	-4.30103	-2.09691	-3	7.20833	0.246503	0.98811	0.090624	0.266933	0.0242027
0.30103	-1.69897	0.477121	2.05994	0.043602	-0.30103	0.209783	-1.69897	-1.69897	-1.69897	-2.69897	-1.69897	-1.69897	-1.69897	-1.69897	-1.69897	-1.69897	-1.69897	-1.69897	-1.69897	-1.69897	-1.69897	-1.69897	-1.69897	-1.69897	-2	-1.69897	2.12775	1.93329	-0.69897	-1.82391	-3.30103	-5	-4	-3	-3	-3.30103	-2.69897	-4.30103	-2.09691	-3	6.5	0.456435	1.02903	0.0689615	0.255683	0.0234091
0.30103	-1.69897	0.477121	2.05994	0.043602	-0.30103	0.209783	-1.69897	-1.69897	-1.69897	-0.69897	-1.69897	-1.69897	-1.69897	-1.69897	-1.69897	-1.69897	-1.69897	-1.69897	-1.69897	-1.69897	-1.69897	-1.69897	-1.69897	-1.69897	-2	-1.69897	2.12775	1.93329	-0.69897	-1.82391	-3.30103	-5	-4	-3	-3	-3.30103	-2.69897	-4.30103	-2.09691	-3	4.58333	0.186339	1.41589	0.205392	0.266044	0.00651755
0.30103	-1.69897	0.477121	2.05994	0.043602	-0.30103	0.209783	-1.69897	-1.69897	-1.69897	0.30103	-1.69897	-1.69897	-1.69897	-1.69897	-1.69897	-1.69897	-1.69897	-1.69897	-1.69897	-1.69897	-1.69897	-1.69897	-1.69897	-1.69897	-2	-1.69897	2.12775	1.93329	-0.69897	-1.82391	-3.30103	-5	-4	-3	-3	-3.30103	-2.69897	-4.30103	-2.09691	-3	4.58333	0.276385	1.20489	0.104125	0.358009	0.0150307
0.30103	-1.69897	0.477121	2.05994	0.043602	-0.30103	0.204391	-1.69897	-1.69897	-1.69897	-1.69897	-4.69897	-1.69897	-1.69897	-1.69897	-1.69897	-1.69897	-1.69897	-1.69897	-1.69897	-1.69897	-1.69897	-1.69897	-1.69897	-1.69897	-2	-1.69897	2.12775	1.93329	-0.69897	-1.82391	-3.30103	-5	-4	-3	-3	-3.30103	-2.69897	-4.30103	-2.09691	-3	5.25	0.25	1.16109	0.111419	0.365767	0.0780278
0.30103	-1.69897	0.477121	2.05994	0.043602	-0.30103	0.204934	-1.69897	-1.69897	-1.69897	-1.69897	-2.69897	-1.69897	-1.69897	-1.69897	-1.69897	-1.69897	-1.69897	-1.69897	-1.69897	-1.69897	-1.69897	-1.69897	-1.69897	-1.69897	-2	-1.69897	2.12775	1.93329	-0.69897	-1.82391	-3.30103	-5	-4	-3	-3	-3.30103	-2.69897	-4.30103	-2.09691	-3	5.29167	0.246503	1.19927	0.118603	0.238378	0.010114
0.30103	-1.69897	0.477121	2.05994	0.043602	-0.30103	0.255514	-1.69897	-1.69897	-1.69897	-1.69897	-0.69897	-1.69897	-1.69897	-1.69897	-1.69897	-1.69897	-1.69897	-1.69897	-1.69897	-1.69897	-1.69897	-1.69897	-1.69897	-1.69897	-2	-1.69897	2.12775	1.93329	-0.69897	-1.82391	-3.30103	-5	-4	-3	-3	-3.30103	-2.69897	-4.30103	-2.09691	-3	6.08333	0.276385	1.07696	0.0515161	0.20135	0.0166178
0.30103	-1.69897	0.477121	2.05994	0.043602	-0.30103	0.556423	-1.69897	-1.69897	-1.69897	-1.69897	0.30103	-1.69897	-1.69897	-1.69897	-1.69897	-1.69897	-1.69897	-1.69897	-1.69897	-1.69897	-1.69897	-1.69897	-1.69897	-1.69897	-2	-1.69897	2.12775	1.93329	-0.69897	-1.82391	-3.30103	-5	-4	-3	-3	-3.30103	-2.69897	-4.30103	-2.09691	-3	8.33333	0.235702	0.850113	0.0741651
0.30103	-1.69897	0.477121	2.05994	0.043602	-0.30103	0.204391	-1.69897	-1.69897	-1.69897	-1.69897	-1.69897	-4.69897	-1.69897	-1.69897	-1.69897	-1.69897	-1.69897	-1.69897	-1.69897	-1.69897	-1.69897	-1.69897	-1.69897	-1.69897	-2	-1.69897	2.12775	1.93329	-0.69897	-1.82391	-3.30103	-5	-4	-3	-3	-3.30103	-2.69897	-4.30103	-2.09691	-3	4.95455	0.25713	1.24708	0.125107	0.2781	0.0397397
0.30103	-1.69897	0.477121	2.05994	0.043602	-0.30103	0.204934	-1.69897	-1.69897	-1.69897	-1.69897	-1.69897	-2.69897	-1.69897	-1.69897	-1.69897	-1.69897	-1.69897	-1.69897	-1.69897	-1.69897	-1.69897	-1.69897	-1.69897	-1.69897	-2	-1.69897	2.12775	1.93329	-0.69897	-1.82391	-3.30103	-5	-4	-3	-3	-3.30103	-2.69897	-4.30103	-2.09691	-3	5	0.288675	1.22958	0.107537	0.275378	0.0356375
0.30103	-1.69897	0.477121	2.05994	0.043602	-0.30103	0.255514	-1.69897	-1.69897	-1.69897	-1.69897	-1.69897	-0.69897	-1.69897	-1.69897	-1.69897	-1.69897	-1.69897	-1.69897	-1.69897	-1.69897	-1.69897	-1.69897	-1.69897	-1.69897	-2	-1.69897	2.12775	1.93329	-0.69897	-1.82391	-3.30103	-5	-4	-3	-3	-3.30103	-2.69897	-4.30103	-2.09691	-3	6.29167	0.246503	1.08423	0.0812015	0.228736	0.00734359
0.30103	-1.69897	0.477121	2.05994	0.043602	-0.30103	0.556423	-1.69897	-1.69897	-1.69897	-1.69897	-1.69897	0.30103	-1.69897	-1.69897	-1.69897	-1.69897	-1.69897	-1.69897	-1.69897	-1.69897	-1.69897	-1.69897	-1.69897	-1.69897	-2	-1.69897	2.12775	1.93329	-0.69897	-1.82391	-3.30103	-5	-4	-3	-3	-3.30103	-2.69897	-4.30103	-2.09691	-3	7.04167	0.320048	1.04131	0.0677064	0.298252	0.030647
0.30103	-1.69897	0.477121	2.05994	0.043602	-0.30103	0.209783	-1.69897	-1.69897	-1.69897	-1.69897	-1.69897	-1.69897	-4.69897	-1.69897	-1.69897	-1.69897	-1.69897	-1.69897	-1.69897	-1.69897	-1.69897	-1.69897	-1.69897	-1.69897	-2	-1.69897	2.12775	1.93329	-0.69897	-1.82391	-3.30103	-5	-4	-3	-3	-3.30103	-2.69897	-4.30103	-2.09691	-3	5.16667	0.235702	1.2148	0.180205	0.269489	0.0335711
0.30103	-1.69897	0.477121	2.05994	0.043602	-0.30103	0.209783	-1.69897	-1.69897	-1.69897	-1.69897	-1.69897	-1.69897	-2.69897	-1.69897	-1.69897	-1.69897	-1.69897	-1.69897	-1.69897	-1.69897	-1.69897	-1.69897	-1.69897	-1.69897	-2	-1.69897	2.12775	1.93329	-0.69897	-1.82391	-3.30103	-5	-4	-3	-3	-3.30103	-2.69897	-4.30103	-2.09691	-3	5.125	0.29756	1.13262	0.153505	0.343767	0.0679556
0.30103	-1.69897	0.477121	2.05994	0.043602	-0.30103	0.209783	-1.69897	-1.69897	-1.69897	-1.69897	-1.69897	-1.69897	-0.69897	-1.69897	-1.69897	-1.69897	-1.69897	-1.69897	-1.69897	-1.69897	-1.69897	-1.69897	-1.69897	-1.69897	-2	-1.69897	2.12775	1.93329	-0.69897	-1.82391	-3.30103	-5	-4	-3	-3	-3.30103	-2.69897	-4.30103	-2.09691	-3	5.08333	0.186339	1.29403	0.1174	0.356628	0.0564785
0.30103	-1.69897	0.477121	2.05994	0.043602	-0.30103	0.209783	-1.69897	-1.69897	-1.69897	-1.69897	-1.69897	-1.69897	0.30103	-1.69897	-1.69897	-1.69897	-1.69897	-1.69897	-1.69897	-1.69897	-1.69897	-1.69897	-1.69897	-1.69897	-2	-1.69897	2.12775	1.93329	-0.69897	-1.82391	-3.30103	-5	-4	-3	-3	-3.30103	-2.69897	-4.30103	-2.09691	-3	5.54167	0.246503	1.12045	0.102072	0.341137	0.0157899
0.30103	-1.69897	0.477121	2.05994	0.043602	-0.30103	0.209783	-1.69897	-1.69897	-1.69897	-1.69897	-1.69897	-1.69897	-1.69897	-4.69897	-1.69897	-1.69897	-1.69897	-1.69897	-1.69897	-1.69897	-1.69897	-1.69897	-1.69897	-1.69897	-2	-1.69897	2.12775	1.93329	-0.69897	-1.82391	-3.30103	-5	-4	-3	-3	-3.30103	-2.69897	-4.30103	-2.09691	-3	5.29167	0.320048	1.28273	0.196874	0.26007	0.0164811
0.30103	-1.69897	0.477121	2.05994	0.043602	-0.30103	0.209783	-1.69897	-1.69897	-1.69897	-1.69897	-1.69897	-1.69897	-1.69897	-2.69897	-1.69897	-1.69897	-1.69897	-1.69897	-1.69897	-1.69897	-1.69897	-1.69897	-1.69897	-1.69897	-2	-1.69897	2.12775	1.93329	-0.69897	-1.82391	-3.30103	-5	-4	-3	-3	-3.30103	-2.69897	-4.30103	-2.09691	-3	5.08333	0.276385	1.17973	0.238208	0.263342	0.0106904
0.30103	-1.69897	0.477121	2.05994	0.043602	-0.30103	0.209783	-1.69897	-1.69897	-1.69897	-1.69897	-1.69897	-1.69897	-1.69897	-0.69897	-1.69897	-1.69897	-1.69897	-1.69897	-1.69897	-1.69897	-1.69897	-1.69897	-1.69897	-1.69897	-2	-1.69897	2.12775	1.93329	-0.69897	-1.82391	-3.30103	-5	-4	-3	-3	-3.30103	-2.69897	-4.30103	-2.09691	-3	5.16667	0.235702	1.09885	0.134031	0.267489	0.0132545
0.30103	-1.69897	0.477121	2.05994	0.043602	-0.30103	0.209783	-1.69897	-1.69897	-1.69897	-1.69897	-1.69897	-1.69897	-1.69897	0.30103	-1.69897	-1.69897	-1.69897	-1.69897	-1.69897	-1.69897	-1.69897	-1.69897	-1.69897	-1.69897	-2	-1.69897	2.12775	1.93329	-0.69897	-1.82391	-3.30103	-5	-4	-3	-3	-3.30103	-2.69897	-4.30103	-2.09691	-3	5.33333	0.311805	1.20784	0.0795528	0.285044	0.0129621
0.30103	-1.69897	0.477121	2.05994	0.043602	-0.30103	0.204391	-1.69897	-1.69897	-1.69897	-1.69897	-1.69897	-1.69897	-1.69897	-1.69897	-4.69897	-1.69897	-1.69897	-1.69897	-1.69897	-1.69897	-1.69897	-1.69897	-1.69897	-1.69897	-2	-1.69897	2.12775	1.93329	-0.69897	-1.82391	-3.30103	-5	-4	-3	-3	-3.30103	-2.69897	-4.30103	-2.09691	-3	5.375	0.360844	1.20219	0.072836	0.251156	0.00557081
0.30103	-1.69897	0.477121	2.05994	0.043602	-0.30103	0.204934	-1.69897	-1.69897	-1.69897	-1.69897	-1.69897	-1.69897	-1.69897	-1.69897	-2.69897	-1.69897	-1.69897	-1.69897	-1.69897	-1.69897	-1.69897	-1.69897	-1.69897	-1.69897	-2	-1.69897	2.12775	1.93329	-0.69897	-1.82391	-3.30103	-5	-4	-3	-3	-3.30103	-2.69897	-4.30103	-2.09691	-3	5.58333	0.276385	1.13523	0.0435555	0.251544	0.00967465
0.30103	-1.69897	0.477121	2.05994	0.043602	-0.30103	0.255514	-1.69897	-1.69897	-1.69897	-1.69897	-1.69897	-1.69897	-1.69897	-1.69897	-0.69897	-1.69897	-1.69897	-1.69897	-1.69897	-1.69897	-1.69897	-1.69897	-1.69897	-1.69897	-2	-1.69897	2.12775	1.93329	-0.69897	-1.82391	-3.30103	-5	-4	-3	-3	-3.30103	-2.69897	-4.30103	-2.09691	-3	5.58333	0.186339	1.15041	0.0717533	0.258267	0.00401271
0.30103	-1.69897	0.477121	2.05994	0.043602	-0.30103	0.556423	-1.69897	-1.69897	-1.69897	-1.69897	-1.69897	-1.69897	-1.69897	-1.69897	0.30103	-1.69897	-1.69897	-1.69897	-1.69897	-1.69897	-1.69897	-1.69897	-1.69897	-1.69897	-2	-1.69897	2.12775	1.93329	-0.69897	-1.82391	-3.30103	-5	-4	-3	-3	-3.30103	-2.69897	-4.30103	-2.09691	-3	5.875	0.360844	1.22764	0.0781978	0.259615	0.00632194
0.30103	-1.69897	0.477121	2.05994	0.043602	-0.30103	0.209783	-1.69897	-1.69897	-1.69897	-1.69897	-1.69897	-1.69897	-1.69897	-1.69897	-1.69897	-4.69897	-1.69897	-1.69897	-1.69897	-1.69897	-1.69897	-1.69897	-1.69897	-1.69897	-2	-1.69897	2.12775	1.93329	-0.69897	-1.82391	-3.30103	-5	-4	-3	-3	-3.30103	-2.69897	-4.30103	-2.09691	-3	0	0	0	0	0	0
0.30103	-1.69897	0.477121	2.05994	0.043602	-0.30103	0.209783	-1.69897	-1.69897	-1.69897	-1.69897	-1.69897	-1.69897	-1.69897	-1.69897	-1.69897	-2.69897	-1.69897	-1.69897	-1.69897	-1.69897	-1.69897	-1.69897	-1.69897	-1.69897	-2	-1.69897	2.12775	1.93329	-0.69897	-1.82391	-3.30103	-5	-4	-3	-3	-3.30103	-2.69897	-4.30103	-2.09691	-3	2.25	2.66536	0.423955	0.507937	0.00326333	0.0049878
0.30103	-1.69897	0.477121	2.05994	0.043602	-0.30103	0.209783	-1.69897	-1.69897	-1.69897	-1.69897	-1.69897	-1.69897	-1.69897	-1.69897	-1.69897	-0.69897	-1.69897	-1.69897	-1.69897	-1.69897	-1.69897	-1.69897	-1.69897	-1.69897	-2	-1.69897	2.12775	1.93329	-0.69897	-1.82391	-3.30103	-5	-4	-3	-3	-3.30103	-2.69897	-4.30103	-2.09691	-3	5.83333	0.372678	1.31683	0.129397	0.255961	0.0065482
0.30103	-1.69897	0.477121	2.05994	0.043602	-0.30103	0.209783	-1.69897	-1.69897	-1.69897	-1.69897	-1.69897	-1.69897	-1.69897	-1.69897	-1.69897	0.30103	-1.69897	-1.69897	-1.69897	-1.69897	-1.69897	-1.69897	-1.69897	-1.69897	-2	-1.69897	2.12775	1.93329	-0.69897	-1.82391	-3.30103	-5	-4	-3	-3	-3.30103	-2.69897	-4.30103	-2.09691	-3	6.5	0.301511	1.05742	0.0256509	0.2581	0.0038658
0.30103	-1.69897	0.477121	2.05994	0.043602	-0.30103	0.209783	-1.69897	-1.69897	-1.69897	-1.69897	-1.69897	-1.69897	-1.69897	-1.69897	-1.69897	-1.69897	-4.69897	-1.69897	-1.69897	-1.69897	-1.69897	-1.69897	-1.69897	-1.69897	-2	-1.69897	2.12775	1.93329	-0.69897	-1.82391	-3.30103	-5	-4	-3	-3	-3.30103	-2.69897	-4.30103	-2.09691	-3	6.16667	0.311805	1.15983	0.0807761	0.232044	0.00553245
0.30103	-1.69897	0.477121	2.05994	0.043602	-0.30103	0.209783	-1.69897	-1.69897	-1.69897	-1.69897	-1.69897	-1.69897	-1.69897	-1.69897	-1.69897	-1.69897	-2.69897	-1.69897	-1.69897	-1.69897	-1.69897	-1.69897	-1.69897	-1.69897	-2	-1.69897	2.12775	1.93329	-0.69897	-1.82391	-3.30103	-5	-4	-3	-3	-3.30103	-2.69897	-4.30103	-2.09691	-3	5.875	0.216506	1.05869	0.0353281	0.227961	0.010775
0.30103	-1.69897	0.477121	2.05994	0.043602	-0.30103	0.209783	-1.69897	-1.69897	-1.69897	-1.69897	-1.69897	-1.69897	-1.69897	-1.69897	-1.69897	-1.69897	-0.69897	-1.69897	-1.69897	-1.69897	-1.69897	-1.69897	-1.69897	-1.69897	-2	-1.69897	2.12775	1.93329	-0.69897	-1.82391	-3.30103	-5	-4	-3	-3	-3.30103	-2.69897	-4.30103	-2.09691	-3	5.45833	0.320048	1.17268	0.105626	0.210822	0.00350088
0.30103	-1.69897	0.477121	2.05994	0.043602	-0.30103	0.209783	-1.69897	-1.69897	-1.69897	-1.69897	-1.69897	-1.69897	-1.69897	-1.69897	-1.69897	-1.69897	0.30103	-1.69897	-1.69897	-1.69897	-1.69897	-1.69897	-1.69897	-1.69897	-2	-1.69897	2.12775	1.93329	-0.69897	-1.82391	-3.30103	-5	-4	-3	-3	-3.30103	-2.69897	-4.30103	-2.09691	-3	7.29167	0.320048	1.02246	0.114877	0.256191	0.00114672
0.30103	-1.69897	0.477121	2.05994	0.043602	-0.30103	0.204391	-1.69897	-1.69897	-1.69897	-1.69897	-1.69897	-1.69897	-1.69897	-1.69897	-1.69897	-1.69897	-1.69897	-4.69897	-1.69897	-1.69897	-1.69897	-1.69897	-1.69897	-1.69897	-2	-1.69897	2.12775	1.93329	-0.69897	-1.82391	-3.30103	-5	-4	-3	-3	-3.30103	-2.69897	-4.30103	-2.09691	-3	8.04167	0.320048	1.10596	0.103781	0.269739	0.0978297
0.30103	-1.69897	0.477121	2.05994	0.043602	-0.30103	0.204934	-1.69897	-1.69897	-1.69897	-1.69897	-1.69897	-1.69897	-1.69897	-1.69897	-1.69897	-1.69897	-1.69897	-2.69897	-1.69897	-1.69897	-1.69897	-1.69897	-1.69897	-1.69897	-2	-1.69897	2.12775	1.93329	-0.69897	-1.82391	-3.30103	-5	-4	-3	-3	-3.30103	-2.69897	-4.30103	-2.09691	-3	5.5	0.288675	1.14755	0.0771893	0.246918	0.0117416
0.30103	-1.69897	0.477121	2.05994	0.043602	-0.30103	0.255514	-1.69897	-1.69897	-1.69897	-1.69897	-1.69897	-1.69897	-1.69897	-1.69897	-1.69897	-1.69897	-1.69897	-0.69897	-1.69897	-1.69897	-1.69897	-1.69897	-1.69897	-1.69897	-2	-1.69897	2.12775	1.93329	-0.69897	-1.82391	-3.30103	-5	-4	-3	-3	-3.30103	-2.69897	-4.30103	-2.09691	-3	5.5	0.288675	1.24477	0.0712214	0.272322	0.00260104
0.30103	-1.69897	0.477121	2.05994	0.043602	-0.30103	0.556423	-1.69897	-1.69897	-1.69897	-1.69897	-1.69897	-1.69897	-1.69897	-1.69897	-1.69897	-1.69897	-1.69897	0.30103	-1.69897	-1.69897	-1.69897	-1.69897	-1.69897	-1.69897	-2	-1.69897	2.12775	1.93329	-0.69897	-1.82391	-3.30103	-5	-4	-3	-3	-3.30103	-2.69897	-4.30103	-2.09691	-3	5.5	0.288675	1.16509	0.0961559	0.274906	0.0037304
0.30103	-1.69897	0.477121	2.05994	0.043602	-0.30103	0.209783	-1.69897	-1.69897	-1.69897	-1.69897	-1.69897	-1.69897	-1.69897	-1.69897	-1.69897	-1.69897	-1.69897	-1.69897	-4.69897	-1.69897	-1.69897	-1.69897	-1.69897	-1.69897	-2	-1.69897	2.12775	1.93329	-0.69897	-1.82391	-3.30103	-5	-4	-3	-3	-3.30103	-2.69897	-4.30103	-2.09691	-3	8.75	0.25	0.901204	0.038184	0.306239	0.102021
0.30103	-1.69897	0.477121	2.05994	0.043602	-0.30103	0.209783	-1.69897	-1.69897	-1.69897	-1.69897	-1.69897	-1.69897	-1.69897	-1.69897	-1.69897	-1.69897	-1.69897	-1.69897	-2.69897	-1.69897	-1.69897	-1.69897	-1.69897	-1.69897	-2	-1.69897	2.12775	1.93329	-0.69897	-1.82391	-3.30103	-5	-4	-3	-3	-3.30103	-2.69897	-4.30103	-2.09691	-3	5.58333	0.343592	0.946587	0.0825413	0.244739	0.0052572
0.30103	-1.69897	0.477121	2.05994	0.043602	-0.30103	0.209783	-1.69897	-1.69897	-1.69897	-1.69897	-1.69897	-1.69897	-1.69897	-1.69897	-1.69897	-1.69897	-1.69897	-1.69897	-0.69897	-1.69897	-1.69897	-1.69897	-1.69897	-1.69897	-2	-1.69897	2.12775	1.93329	-0.69897	-1.82391	-3.30103	-5	-4	-3	-3	-3.30103	-2.69897	-4.30103	-2.09691	-3	5.29167	0.320048	1.17482	0.0646485	0.2721	0.00467262
0.30103	-1.69897	0.477121	2.05994	0.043602	-0.30103	0.209783	-1.69897	-1.69897	-1.69897	-1.69897	-1.69897	-1.69897	-1.69897	-1.69897	-1.69897	-1.69897	-1.69897	-1.69897	0.30103	-1.69897	-1.69897	-1.69897	-1.69897	-1.69897	-2	-1.69897	2.12775	1.93329	-0.69897	-1.82391	-3.30103	-5	-4	-3	-3	-3.30103	-2.69897	-4.30103	-2.09691	-3	4.95833	0.320048	1.19563	0.0907149	0.2696	0.00362221
0.30103	-1.69897	0.477121	2.05994	0.043602	-0.30103	0.209783	-1.69897	-1.69897	-1.69897	-1.69897	-1.69897	-1.69897	-1.69897	-1.69897	-1.69897	-1.69897	-1.69897	-1.69897	-1.69897	-4.69897	-1.69897	-1.69897	-1.69897	-1.69897	-2	-1.69897	2.12775	1.93329	-0.69897	-1.82391	-3.30103	-5	-4	-3	-3	-3.30103	-2.69897	-4.30103	-2.09691	-3	5.70833	0.246503	1.17837	0.082681	0.2436	0.00471306
0.30103	-1.69897	0.477121	2.05994	0.043602	-0.30103	0.209783	-1.69897	-1.69897	-1.69897	-1.69897	-1.69897	-1.69897	-1.69897	-1.69897	-1.69897	-1.69897	-1.69897	-1.69897	-1.69897	-2.69897	-1.69897	-1.69897	-1.69897	-1.69897	-2	-1.69897	2.12775	1.93329	-0.69897	-1.82391	-3.30103	-5	-4	-3	-3	-3.30103	-2.69897	-4.30103	-2.09691	-3	5.58333	0.343592	1.1583	0.0768723	0.255378	0.00591269
0.30103	-1.69897	0.477121	2.05994	0.043602	-0.30103	0.209783	-1.69897	-1.69897	-1.69897	-1.69897	-1.69897	-1.69897	-1.69897	-1.69897	-1.69897	-1.69897	-1.69897	-1.69897	-1.69897	-0.69897	-1.69897	-1.69897	-1.69897	-1.69897	-2	-1.69897	2.12775	1.93329	-0.69897	-1.82391	-3.30103	-5	-4	-3	-3	-3.30103	-2.69897	-4.30103	-2.09691	-3	5.33333	0.311805	1.20425	0.0883419	0.26085	0.004798
0.30103	-1.69897	0.477121	2.05994	0.043602	-0.30103	0.209783	-1.69897	-1.69897	-1.69897	-1.69897	-1.69897	-1.69897	-1.69897	-1.69897	-1.69897	-1.69897	-1.69897	-1.69897	-1.69897	0.30103	-1.69897	-1.69897	-1.69897	-1.69897	-2	-1.69897	2.12775	1.93329	-0.69897	-1.82391	-3.30103	-5	-4	-3	-3	-3.30103	-2.69897	-4.30103	-2.09691	-3	5.41667	0.276385	1.23365	0.10176	0.257128	0.0066881
0.30103	-1.69897	0.477121	2.05994	0.043602	-0.30103	0.209783	-1.69897	-1.69897	-1.69897	-1.69897	-1.69897	-1.69897	-1.69897	-1.69897	-1.69897	-1.69897	-1.69897	-1.69897	-1.69897	-1.69897	-4.69897	-1.69897	-1.69897	-1.69897	-2	-1.69897	2.12775	1.93329	-0.69897	-1.82391	-3.30103	-5	-4	-3	-3	-3.30103	-2.69897	-4.30103	-2.09691	-3	5.66667	0.311805	1.15154	0.0736749	0.252406	0.0197777
0.30103	-1.69897	0.477121	2.05994	0.043602	-0.30103	0.209783	-1.69897	-1.69897	-1.69897	-1.69897	-1.69897	-1.69897	-1.69897	-1.69897	-1.69897	-1.69897	-1.69897	-1.69897	-1.69897	-1.69897	-2.69897	-1.69897	-1.69897	-1.69897	-2	-1.69897	2.12775	1.93329	-0.69897	-1.82391	-3.30103	-5	-4	-3	-3	-3.30103	-2.69897	-4.30103	-2.09691	-3	5.625	0.29756	1.15653	0.0677085	0.252517	0.0113064
0.30103	-1.69897	0.477121	2.05994	0.043602	-0.30103	0.209783	-1.69897	-1.69897	-1.69897	-1.69897	-1.69897	-1.69897	-1.69897	-1.69897	-1.69897	-1.69897	-1.69897	-1.69897	-1.69897	-1.69897	-0.69897	-1.69897	-1.69897	-1.69897	-2	-1.69897	2.12775	1.93329	-0.69897	-1.82391	-3.30103	-5	-4	-3	-3	-3.30103	-2.69897	-4.30103	-2.09691	-3	5.66667	0.235702	1.14681	0.189527	0.273017	0.00921565
0.30103	-1.69897	0.477121	2.05994	0.043602	-0.30103	0.209783	-1.69897	-1.69897	-1.69897	-1.69897	-1.69897	-1.69897	-1.69897	-1.69897	-1.69897	-1.69897	-1.69897	-1.69897	-1.69897	-1.69897	0.30103	-1.69897	-1.69897	-1.69897	-2	-1.69897	2.12775	1.93329	-0.69897	-1.82391	-3.30103	-5	-4	-3	-3	-3.30103	-2.69897	-4.30103	-2.09691	-3	5.625	0.360844	1.09434	0.0703471	0.381878	0.0141822
0.30103	-1.69897	0.477121	2.05994	0.043602	-0.30103	0.209783	-1.69897	-1.69897	-1.69897	-1.69897	-1.69897	-1.69897	-1.69897	-1.69897	-1.69897	-1.69897	-1.69897	-1.69897	-1.69897	-1.69897	-1.69897	-4.69897	-1.69897	-1.69897	-2	-1.69897	2.12775	1.93329	-0.69897	-1.82391	-3.30103	-5	-4	-3	-3	-3.30103	-2.69897	-4.30103	-2.09691	-3	6.125	0.29756	1.1288	0.0674761	0.260378	0.00433084
0.30103	-1.69897	0.477121	2.05994	0.043602	-0.30103	0.209783	-1.69897	-1.69897	-1.69897	-1.69897	-1.69897	-1.69897	-1.69897	-1.69897	-1.69897	-1.69897	-1.69897	-1.69897	-1.69897	-1.69897	-1.69897	-2.69897	-1.69897	-1.69897	-2	-1.69897	2.12775	1.93329	-0.69897	-1.82391	-3.30103	-5	-4	-3	-3	-3.30103	-2.69897	-4.30103	-2.09691	-3	5.72727	0.248965	1.14965	0.0927464	0.254989	0.00733502
0.30103	-1.69897	0.477121	2.05994	0.043602	-0.30103	0.209783	-1.69897	-1.69897	-1.69897	-1.69897	-1.69897	-1.69897	-1.69897	-1.69897	-1.69897	-1.69897	-1.69897	-1.69897	-1.69897	-1.69897	-1.69897	-0.69897	-1.69897	-1.69897	-2	-1.69897	2.12775	1.93329	-0.69897	-1.82391	-3.30103	-5	-4	-3	-3	-3.30103	-2.69897	-4.30103	-2.09691	-3	5.54167	0.246503	1.29218	0.0434274	0.255017	0.0104882
0.30103	-1.69897	0.477121	2.05994	0.043602	-0.30103	0.209783	-1.69897	-1.69897	-1.69897	-1.69897	-1.69897	-1.69897	-1.69897	-1.69897	-1.69897	-1.69897	-1.69897	-1.69897	-1.69897	-1.69897	-1.69897	0.30103	-1.69897	-1.69897	-2	-1.69897	2.12775	1.93329	-0.69897	-1.82391	-3.30103	-5	-4	-3	-3	-3.30103	-2.69897	-4.30103	-2.09691	-3	5.91667	0.276385	1.18832	0.0534428	0.272167	0.0300055
0.30103	-1.69897	0.477121	2.05994	0.043602	-0.30103	0.209783	-1.69897	-1.69897	-1.69897	-1.69897	-1.69897	-1.69897	-1.69897	-1.69897	-1.69897	-1.69897	-1.69897	-1.69897	-1.69897	-1.69897	-1.69897	-1.69897	-4.69897	-1.69897	-2	-1.69897	2.12775	1.93329	-0.69897	-1.82391	-3.30103	-5	-4	-3	-3	-3.30103	-2.69897	-4.30103	-2.09691	-3	6.33333	0.235702	1.08648	0.088536	0.248572	0.012705
0.30103	-1.69897	0.477121	2.05994	0.043602	-0.30103	0.209783	-1.69897	-1.69897	-1.69897	-1.69897	-1.69897	-1.69897	-1.69897	-1.69897	-1.69897	-1.69897	-1.69897	-1.69897	-1.69897	-1.69897	-1.69897	-1.69897	-2.69897	-1.69897	-2	-1.69897	2.12775	1.93329	-0.69897	-1.82391	-3.30103	-5	-4	-3	-3	-3.30103	-2.69897	-4.30103	-2.09691	-3	5.875	0.29756	1.18759	0.127263	0.253989	0.00746639
0.30103	-1.69897	0.477121	2.05994	0.043602	-0.30103	0.209783	-1.69897	-1.69897	-1.69897	-1.69897	-1.69897	-1.69897	-1.69897	-1.69897	-1.69897	-1.69897	-1.69897	-1.69897	-1.69897	-1.69897	-1.69897	-1.69897	-0.69897	-1.69897	-2	-1.69897	2.12775	1.93329	-0.69897	-1.82391	-3.30103	-5	-4	-3	-3	-3.30103	-2.69897	-4.30103	-2.09691	-3	5.79167	0.320048	1.15922	0.110016	0.264544	0.00446661
0.30103	-1.69897	0.477121	2.05994	0.043602	-0.30103	0.209783	-1.69897	-1.69897	-1.69897	-1.69897	-1.69897	-1.69897	-1.69897	-1.69897	-1.69897	-1.69897	-1.69897	-1.69897	-1.69897	-1.69897	-1.69897	-1.69897	0.30103	-1.69897	-2	-1.69897	2.12775	1.93329	-0.69897	-1.82391	-3.30103	-5	-4	-3	-3	-3.30103	-2.69897	-4.30103	-2.09691	-3	5.91667	0.448764	1.12409	0.103398	0.280858	0.00722243
0.30103	-1.69897	0.477121	2.05994	0.043602	-0.30103	0.209783	-1.69897	-1.69897	-1.69897	-1.69897	-1.69897	-1.69897	-1.69897	-1.69897	-1.69897	-1.69897	-1.69897	-1.69897	-1.69897	-1.69897	-1.69897	-1.69897	-1.69897	-4.69897	-2	-1.69897	2.12775	1.93329	-0.69897	-1.82391	-3.30103	-5	-4	-3	-3	-3.30103	-2.69897	-4.30103	-2.09691	-3	5.625	0.360844	1.18711	0.108073	0.251933	0.00736797
0.30103	-1.69897	0.477121	2.05994	0.043602	-0.30103	0.209783	-1.69897	-1.69897	-1.69897	-1.69897	-1.69897	-1.69897	-1.69897	-1.69897	-1.69897	-1.69897	-1.69897	-1.69897	-1.69897	-1.69897	-1.69897	-1.69897	-1.69897	-2.69897	-2	-1.69897	2.12775	1.93329	-0.69897	-1.82391	-3.30103	-5	-4	-3	-3	-3.30103	-2.69897	-4.30103	-2.09691	-3	5.625	0.29756	1.15854	0.0858439	0.242039	0.00489654
0.30103	-1.69897	0.477121	2.05994	0.043602	-0.30103	0.209783	-1.69897	-1.69897	-1.69897	-1.69897	-1.69897	-1.69897	-1.69897	-1.69897	-1.69897	-1.69897	-1.69897	-1.69897	-1.69897	-1.69897	-1.69897	-1.69897	-1.69897	-0.69897	-2	-1.69897	2.12775	1.93329	-0.69897	-1.82391	-3.30103	-5	-4	-3	-3	-3.30103	-2.69897	-4.30103	-2.09691	-3	5.625	0.29756	1.23655	0.151209	0.260711	0.00599511
0.30103	-1.69897	0.477121	2.05994	0.043602	-0.30103	0.209783	-1.69897	-1.69897	-1.69897	-1.69897	-1.69897	-1.69897	-1.69897	-1.69897	-1.69897	-1.69897	-1.69897	-1.69897	-1.69897	-1.69897	-1.69897	-1.69897	-1.69897	0.30103	-2	-1.69897	2.12775	1.93329	-0.69897	-1.82391	-3.30103	-5	-4	-3	-3	-3.30103	-2.69897	-4.30103	-2.09691	-3	5.5	0.288675	1.20248	0.0645062	0.301489	0.0333885
0.30103	-1.69897	0.477121	2.05994	0.043602	-0.30103	0.209783	-1.69897	-1.69897	-1.69897	-1.69897	-1.69897	-1.69897	-1.69897	-1.69897	-1.69897	-1.69897	-1.69897	-1.69897	-1.69897	-1.69897	-1.69897	-1.69897	-1.69897	-1.69897	-5	-1.69897	2.12775	1.93329	-0.69897	-1.82391	-3.30103	-5	-4	-3	-3	-3.30103	-2.69897	-4.30103	-2.09691	-3	5.66667	0.276385	1.14848	0.124034	0.27852	0.048489
0.30103	-1.69897	0.477121	2.05994	0.043602	-0.30103	0.209783	-1.69897	-1.69897	-1.69897	-1.69897	-1.69897	-1.69897	-1.69897	-1.69897	-1.69897	-1.69897	-1.69897	-1.69897	-1.69897	-1.69897	-1.69897	-1.69897	-1.69897	-1.69897	-3	-1.69897	2.12775	1.93329	-0.69897	-1.82391	-3.30103	-5	-4	-3	-3	-3.30103	-2.69897	-4.30103	-2.09691	-3	5.47917	0.33786	1.14545	0.092437	0.256479	0.0168071
0.30103	-1.69897	0.477121	2.05994	0.043602	-0.30103	0.209783	-1.69897	-1.69897	-1.69897	-1.69897	-1.69897	-1.69897	-1.69897	-1.69897	-1.69897	-1.69897	-1.69897	-1.69897	-1.69897	-1.69897	-1.69897	-1.69897	-1.69897	-1.69897	-1	-1.69897	2.12775	1.93329	-0.69897	-1.82391	-3.30103	-5	-4	-3	-3	-3.30103	-2.69897	-4.30103	-2.09691	-3	5.5625	0.299739	1.1501	0.0780875	0.262161	0.0135642
0.30103	-1.69897	0.477121	2.05994	0.043602	-0.30103	0.209783	-1.69897	-1.69897	-1.69897	-1.69897	-1.69897	-1.69897	-1.69897	-1.69897	-1.69897	-1.69897	-1.69897	-1.69897	-1.69897	-1.69897	-1.69897	-1.69897	-1.69897	-1.69897	0	-1.69897	2.12775	1.93329	-0.69897	-1.82391	-3.30103	-5	-4	-3	-3	-3.30103	-2.69897	-4.30103	-2.09691	-3	5.60417	0.322076	1.12268	0.0760133	0.258003	0.0182411
0.30103	-1.69897	0.477121	2.05994	0.043602	-0.30103	0.209783	-1.69897	-1.69897	-1.69897	-1.69897	-1.69897	-1.69897	-1.69897	-1.69897	-1.69897	-1.69897	-1.69897	-1.69897	-1.69897	-1.69897	-1.69897	-1.69897	-1.69897	-1.69897	-2	-4.69897	2.12775	1.93329	-0.69897	-1.82391	-3.30103	-5	-4	-3	-3	-3.30103	-2.69897	-4.30103	-2.09691	-3	5.95833	0.320048	1.18467	0.0735812	0.243114	0.00602578
0.30103	-1.69897	0.477121	2.05994	0.043602	-0.30103	0.209783	-1.69897	-1.69897	-1.69897	-1.69897	-1.69897	-1.69897	-1.69897	-1.69897	-1.69897	-1.69897	-1.69897	-1.69897	-1.69897	-1.69897	-1.69897	-1.69897	-1.69897	-1.69897	-2	-2.69897	2.12775	1.93329	-0.69897	-1.82391	-3.30103	-5	-4	-3	-3	-3.30103	-2.69897	-4.30103	-2.09691	-3	5.72917	0.287922	1.28762	0.152708	0.241947	0.00544329
0.30103	-1.69897	0.477121	2.05994	0.043602	-0.30103	0.209783	-1.69897	-1.69897	-1.69897	-1.69897	-1.69897	-1.69897	-1.69897	-1.69897	-1.69897	-1.69897	-1.69897	-1.69897	-1.69897	-1.69897	-1.69897	-1.69897	-1.69897	-1.69897	-2	-0.69897	2.12775	1.93329	-0.69897	-1.82391	-3.30103	-5	-4	-3	-3	-3.30103	-2.69897	-4.30103	-2.09691	-3	5.41667	0.372678	1.2564	0.0960898	0.204219	0.0433713
0.30103	-1.69897	0.477121	2.05994	0.043602	-0.30103	0.209783	-1.69897	-1.69897	-1.69897	-1.69897	-1.69897	-1.69897	-1.69897	-1.69897	-1.69897	-1.69897	-1.69897	-1.69897	-1.69897	-1.69897	-1.69897	-1.69897	-1.69897	-1.69897	-2	0.30103	2.12775	1.93329	-0.69897	-1.82391	-3.30103	-5	-4	-3	-3	-3.30103	-2.69897	-4.30103	-2.09691	-3	8.5625	0.390312	0.726836	0.0726889
0.30103	-1.69897	0.477121	2.05994	0.043602	-0.30103	0.152594	-1.69897	-1.69897	-1.69897	-1.69897	-1.69897	-1.69897	-1.69897	-1.69897	-1.69897	-1.69897	-1.69897	-1.69897	-1.69897	-1.69897	-1.69897	-1.69897	-1.69897	-1.69897	-2	-1.69897	2.1271	1.93329	-0.69897	-1.82391	-3.30103	-5	-4	-3	-3	-3.30103	-2.69897	-4.30103	-2.09691	-3	5.5	0.25	1.12714	0.117083	0.270656	0.050616
0.30103	-1.69897	0.477121	2.05994	0.043602	-0.30103	0.158664	-1.69897	-1.69897	-1.69897	-1.69897	-1.69897	-1.69897	-1.69897	-1.69897	-1.69897	-1.69897	-1.69897	-1.69897	-1.69897	-1.69897	-1.69897	-1.69897	-1.69897	-1.69897	-2	-1.69897	2.12717	1.93329	-0.69897	-1.82391	-3.30103	-5	-4	-3	-3	-3.30103	-2.69897	-4.30103	-2.09691	-3	5.54167	0.320048	1.11692	0.0943564	0.267919	0.0337517
0.30103	-1.69897	0.477121	2.05994	0.043602	-0.30103	0.534153	-1.69897	-1.69897	-1.69897	-1.69897	-1.69897	-1.69897	-1.69897	-1.69897	-1.69897	-1.69897	-1.69897	-1.69897	-1.69897	-1.69897	-1.69897	-1.69897	-1.69897	-1.69897	-2	-1.69897	2.13354	1.93329	-0.69897	-1.82391	-3.30103	-5	-4	-3	-3	-3.30103	-2.69897	-4.30103	-2.09691	-3	5.6875	0.242061	1.13009	0.0579904	0.255947	0.0116217
0.30103	-1.69897	0.477121	2.05994	0.043602	-0.30103	1.33084	-1.69897	-1.69897	-1.69897	-1.69897	-1.69897	-1.69897	-1.69897	-1.69897	-1.69897	-1.69897	-1.69897	-1.69897	-1.69897	-1.69897	-1.69897	-1.69897	-1.69897	-1.69897	-2	-1.69897	2.18752	1.93329	-0.69897	-1.82391	-3.30103	-5	-4	-3	-3	-3.30103	-2.69897	-4.30103	-2.09691	-3	5.58333	0.372678	1.11716	0.04316	0.263128	0.0223505
0.30103	-1.69897	0.477121	2.05994	0.043602	-0.30103	0.182129	-1.69897	-1.69897	-1.69897	-1.69897	-1.69897	-1.69897	-1.69897	-1.69897	-1.69897	-1.69897	-1.69897	-1.69897	-1.69897	-1.69897	-1.69897	-1.69897	-1.69897	-1.69897	-2	-1.69897	2.12775	1.93279	-0.69897	-1.82391	-3.30103	-5	-4	-3	-3	-3.30103	-2.69897	-4.30103	-2.09691	-3	5.54167	0.320048	1.15583	0.113948	0.261836	0.0221391
0.30103	-1.69897	0.477121	2.05994	0.043602	-0.30103	0.184975	-1.69897	-1.69897	-1.69897	-1.69897	-1.69897	-1.69897	-1.69897	-1.69897	-1.69897	-1.69897	-1.69897	-1.69897	-1.69897	-1.69897	-1.69897	-1.69897	-1.69897	-1.69897	-2	-1.69897	2.12775	1.93284	-0.69897	-1.82391	-3.30103	-5	-4	-3	-3	-3.30103	-2.69897	-4.30103	-2.09691	-3	5.47917	0.227265	1.12705	0.127644	0.261145	0.014625
0.30103	-1.69897	0.477121	2.05994	0.043602	-0.30103	0.401573	-1.69897	-1.69897	-1.69897	-1.69897	-1.69897	-1.69897	-1.69897	-1.69897	-1.69897	-1.69897	-1.69897	-1.69897	-1.69897	-1.69897	-1.69897	-1.69897	-1.69897	-1.69897	-2	-1.69897	2.12775	1.93783	-0.69897	-1.82391	-3.30103	-5	-4	-3	-3	-3.30103	-2.69897	-4.30103	-2.09691	-3	5.5625	0.262698	1.16132	0.091404	0.260753	0.0119468
0.30103	-1.69897	0.477121	2.05994	0.043602	-0.30103	1.06149	-1.69897	-1.69897	-1.69897	-1.69897	-1.69897	-1.69897	-1.69897	-1.69897	-1.69897	-1.69897	-1.69897	-1.69897	-1.69897	-1.69897	-1.69897	-1.69897	-1.69897	-1.69897	-2	-1.69897	2.12775	1.98074	-0.69897	-1.82391	-3.30103	-5	-4	-3	-3	-3.30103	-2.69897	-4.30103	-2.09691	-3	5.36957	0.219554	1.21635	0.108201	0.290586	0.0512221
0.30103	-1.69897	0.477121	2.05994	0.00242958	-0.30103	0.209783	-1.69897	-1.69897	-1.69897	-1.69897	-1.69897	-1.69897	-1.69897	-1.69897	-1.69897	-1.69897	-1.69897	-1.69897	-1.69897	-1.69897	-1.69897	-1.69897	-1.69897	-1.69897	-2	-1.69897	2.12775	1.93329	-1	-1.82391	-3.30103	-5	-4	-3	-3	-3.30103	-2.69897	-4.30103	-2.09691	-3	5.375	0.216506	1.12431	0.0715124	0.257267	0.0157859
0.30103	-1.69897	0.477121	2.05994	0.00672697	-0.30103	0.209783	-1.69897	-1.69897	-1.69897	-1.69897	-1.69897	-1.69897	-1.69897	-1.69897	-1.69897	-1.69897	-1.69897	-1.69897	-1.69897	-1.69897	-1.69897	-1.69897	-1.69897	-1.69897	-2	-1.69897	2.12775	1.93329	-0.958607	-1.82391	-3.30103	-5	-4	-3	-3	-3.30103	-2.69897	-4.30103	-2.09691	-3	5.41667	0.276385	1.14096	0.0905242	0.250544	0.0080569
0.30103	-1.69897	0.477121	2.05994	0.302246	-0.30103	0.209783	-1.69897	-1.69897	-1.69897	-1.69897	-1.69897	-1.69897	-1.69897	-1.69897	-1.69897	-1.69897	-1.69897	-1.69897	-1.69897	-1.69897	-1.69897	-1.69897	-1.69897	-1.69897	-2	-1.69897	2.12775	1.93329	0.0413927	-1.82391	-3.30103	-5	-4	-3	-3	-3.30103	-2.69897	-4.30103	-2.09691	-3	5.41667	0.343592	1.09089	0.0691783	0.256183	0.00294117
0.30103	-1.69897	0.477121	2.05994	1.04161	-0.30103	0.209783	-1.69897	-1.69897	-1.69897	-1.69897	-1.69897	-1.69897	-1.69897	-1.69897	-1.69897	-1.69897	-1.69897	-1.69897	-1.69897	-1.69897	-1.69897	-1.69897	-1.69897	-1.69897	-2	-1.69897	2.12775	1.93329	1.00432	-1.82391	-3.30103	-5	-4	-3	-3	-3.30103	-2.69897	-4.30103	-2.09691	-3	5.45833	0.246503	1.14012	0.0749726	0.237267	0.00218793
0.30103	-1.69897	0.477121	2.05994	0.043602	-0.30103	0.152594	-1.69897	-1.69897	-1.69897	-1.69897	-1.69897	-1.69897	-1.69897	-1.69897	-1.69897	-1.69897	-1.69897	-1.69897	-1.69897	-1.69897	-1.69897	-1.69897	-1.69897	-1.69897	-2	-1.69897	2.12775	1.93329	-1	-1.82391	-3.30103	-5	-4	-3	-3	-3.30103	-2.69897	-4.30103	-2.09691	-3	5.5	0.288675	1.13919	0.0563583	0.261489	0.0104393
0.30103	-1.69897	0.477121	2.05994	0.043602	-0.30103	0.158664	-1.69897	-1.69897	-1.69897	-1.69897	-1.69897	-1.69897	-1.69897	-1.69897	-1.69897	-1.69897	-1.69897	-1.69897	-1.69897	-1.69897	-1.69897	-1.69897	-1.69897	-1.69897	-2	-1.69897	2.12775	1.93329	-0.958607	-1.82391	-3.30103	-5	-4	-3	-3	-3.30103	-2.69897	-4.30103	-2.09691	-3	5.25	0.25	1.21701	0.165015	0.260585	0.0122618
0.30103	-1.69897	0.477121	2.05994	0.043602	-0.30103	0.534153	-1.69897	-1.69897	-1.69897	-1.69897	-1.69897	-1.69897	-1.69897	-1.69897	-1.69897	-1.69897	-1.69897	-1.69897	-1.69897	-1.69897	-1.69897	-1.69897	-1.69897	-1.69897	-2	-1.69897	2.12775	1.93329	0.0413927	-1.82391	-3.30103	-5	-4	-3	-3	-3.30103	-2.69897	-4.30103	-2.09691	-3	5.25	0.25	1.16222	0.0862827	0.258933	0.00403801
0.30103	-1.69897	0.477121	2.05994	0.043602	-0.30103	1.33084	-1.69897	-1.69897	-1.69897	-1.69897	-1.69897	-1.69897	-1.69897	-1.69897	-1.69897	-1.69897	-1.69897	-1.69897	-1.69897	-1.69897	-1.69897	-1.69897	-1.69897	-1.69897	-2	-1.69897	2.12775	1.93329	1.00432	-1.82391	-3.30103	-5	-4	-3	-3	-3.30103	-2.69897	-4.30103	-2.09691	-3	5.33333	0.235702	1.12578	0.085985	0.245517	0.00240803
0.30103	-1.69897	0.477121	2.05994	0.043602	-0.30103	0.204391	-1.69897	-1.69897	-1.69897	-1.69897	-1.69897	-1.69897	-1.69897	-1.69897	-1.69897	-1.69897	-1.69897	-1.69897	-1.69897	-1.69897	-1.69897	-1.69897	-1.69897	-1.69897	-2	-1.69897	2.12775	1.93329	-0.69897	-2.30103	-3.30103	-5	-4	-3	-3	-3.30103	-2.69897	-4.30103	-2.09691	-3	5.58333	0.276385	1.11953	0.102178	0.258628	0.0148676
0.30103	-1.69897	0.477121	2.05994	0.043602	-0.30103	0.204934	-1.69897	-1.69897	-1.69897	-1.69897	-1.69897	-1.69897	-1.69897	-1.69897	-1.69897	-1.69897	-1.69897	-1.69897	-1.69897	-1.69897	-1.69897	-1.69897	-1.69897	-1.69897	-2	-1.69897	2.12775	1.93329	-0.69897	-2.22185	-3.30103	-5	-4	-3	-3	-3.30103	-2.69897	-4.30103	-2.09691	-3	5.33333	0.235702	1.11714	0.0445598	0.261683	0.00446618
0.30103	-1.69897	0.477121	2.05994	0.043602	-0.30103	0.255514	-1.69897	-1.69897	-1.69897	-1.69897	-1.69897	-1.69897	-1.69897	-1.69897	-1.69897	-1.69897	-1.69897	-1.69897	-1.69897	-1.69897	-1.69897	-1.69897	-1.69897	-1.69897	-2	-1.69897	2.12775	1.93329	-0.69897	-0.978811	-3.30103	-5	-4	-3	-3	-3.30103	-2.69897	-4.30103	-2.09691	-3	5.625	0.29756	1.09276	0.0870257	0.263044	0.0116974
0.30103	-1.69897	0.477121	2.05994	0.043602	-0.30103	0.556423	-1.69897	-1.69897	-1.69897	-1.69897	-1.69897	-1.69897	-1.69897	-1.69897	-1.69897	-1.69897	-1.69897	-1.69897	-1.69897	-1.69897	-1.69897	-1.69897	-1.69897	-1.69897	-2	-1.69897	2.12775	1.93329	-0.69897	0.00216606	-3.30103	-5	-4	-3	-3	-3.30103	-2.69897	-4.30103	-2.09691	-3	5.45833	0.557462	1.18188	0.292521	0.282156	0.00887447
0.30103	-1.69897	0.477121	2.05994	0.0416335	-0.30103	0.209783	-1.69897	-1.69897	-1.69897	-1.69897	-1.69897	-1.69897	-1.69897	-1.69897	-1.69897	-1.69897	-1.69897	-1.69897	-1.69897	-1.69897	-1.69897	-1.69897	-1.69897	-1.69897	-2	-1.69897	2.12775	1.93329	-0.69897	-2	-3.30103	-5	-4	-3	-3	-3.30103	-2.69897	-4.30103	-2.09691	-3	5.625	0.29756	1.16258	0.0804734	0.261794	0.0125598
0.30103	-1.69897	0.477121	2.05994	0.0418307	-0.30103	0.209783	-1.69897	-1.69897	-1.69897	-1.69897	-1.69897	-1.69897	-1.69897	-1.69897	-1.69897	-1.69897	-1.69897	-1.69897	-1.69897	-1.69897	-1.69897	-1.69897	-1.69897	-1.69897	-2	-1.69897	2.12775	1.93329	-0.69897	-1.97881	-3.30103	-5	-4	-3	-3	-3.30103	-2.69897	-4.30103	-2.09691	-3	5.75	0.25	1.16434	0.0628455	0.264933	0.00765398
0.30103	-1.69897	0.477121	2.05994	0.0609281	-0.30103	0.209783	-1.69897	-1.69897	-1.69897	-1.69897	-1.69897	-1.69897	-1.69897	-1.69897	-1.69897	-1.69897	-1.69897	-1.69897	-1.69897	-1.69897	-1.69897	-1.69897	-1.69897	-1.69897	-2	-1.69897	2.12775	1.93329	-0.69897	-1.22185	-3.30103	-5	-4	-3	-3	-3.30103	-2.69897	-4.30103	-2.09691	-3	5.54167	0.379601	1.12564	0.107367	0.267211	0.0148557
0.30103	-1.69897	0.477121	2.05994	0.204286	-0.30103	0.209783	-1.69897	-1.69897	-1.69897	-1.69897	-1.69897	-1.69897	-1.69897	-1.69897	-1.69897	-1.69897	-1.69897	-1.69897	-1.69897	-1.69897	-1.69897	-1.69897	-1.69897	-1.69897	-2	-1.69897	2.12775	1.93329	-0.69897	-0.29243	-3.30103	-5	-4	-3	-3	-3.30103	-2.69897	-4.30103	-2.09691	-3	5.625	0.29756	1.20099	0.0832951	0.256878	0.00321551
0.30103	-4.69897	0.477121	2.05994	0.043602	-0.30103	0.209783	-1.69897	-1.69897	-1.69897	-1.69897	-1.69897	-1.69897	-1.69897	-1.69897	-1.69897	-1.69897	-1.69897	-1.69897	-1.69897	-1.69897	-1.69897	-1.69897	-1.69897	-1.69897	-2	-1.69897	2.12775	1.93299	-0.69897	-1.82391	-3.30103	-5	-4	-3	-3	-3.30103	-2.69897	-4.30103	-2.09691	-3	5.29167	0.246503	1.19663	0.0833464	0.249191	0.0112323
0.30103	-2.69897	0.477121	2.05994	0.043602	-0.30103	0.209783	-1.69897	-1.69897	-1.69897	-1.69897	-1.69897	-1.69897	-1.69897	-1.69897	-1.69897	-1.69897	-1.69897	-1.69897	-1.69897	-1.69897	-1.69897	-1.69897	-1.69897	-1.69897	-2	-1.69897	2.12775	1.93302	-0.69897	-1.82391	-3.30103	-5	-4	-3	-3	-3.30103	-2.69897	-4.30103	-2.09691	-3	5.29167	0.320048	1.19246	0.0918167	0.267767	0.0294124
0.30103	-0.69897	0.477121	2.05994	0.043602	-0.30103	0.209783	-1.69897	-1.69897	-1.69897	-1.69897	-1.69897	-1.69897	-1.69897	-1.69897	-1.69897	-1.69897	-1.69897	-1.69897	-1.69897	-1.69897	-1.69897	-1.69897	-1.69897	-1.69897	-2	-1.69897	2.12775	1.93602	-0.69897	-1.82391	-3.30103	-5	-4	-3	-3	-3.30103	-2.69897	-4.30103	-2.09691	-3	5.45833	0.246503	1.16105	0.0737067	0.251128	0.00553852
0.30103	0.30103	0.477121	2.05994	0.043602	-0.30103	0.209783	-1.69897	-1.69897	-1.69897	-1.69897	-1.69897	-1.69897	-1.69897	-1.69897	-1.69897	-1.69897	-1.69897	-1.69897	-1.69897	-1.69897	-1.69897	-1.69897	-1.69897	-1.69897	-2	-1.69897	2.12775	1.96238	-0.69897	-1.82391	-3.30103	-5	-4	-3	-3	-3.30103	-2.69897	-4.30103	-2.09691	-3	5.41667	0.186339	1.17602	0.102218	0.276267	0.00466369
0.30103	-1.69897	0.477121	2.05994	0.043602	-3.30103	0.209783	-1.69897	-1.69897	-1.69897	-1.69897	-1.69897	-1.69897	-1.69897	-1.69897	-1.69897	-1.69897	-1.69897	-1.69897	-1.69897	-1.69897	-1.69897	-1.69897	-1.69897	-1.69897	-2	-1.69897	2.12775	1.9282	-0.69897	-1.82391	-3.30103	-5	-4	-3	-3	-3.30103	-2.69897	-4.30103	-2.09691	-3	5.29167	0.320048	1.16401	0.104711	0.259312	0.0124813
0.30103	-1.69897	0.477121	2.05994	0.043602	-1.30103	0.209783	-1.69897	-1.69897	-1.69897	-1.69897	-1.69897	-1.69897	-1.69897	-1.69897	-1.69897	-1.69897	-1.69897	-1.69897	-1.69897	-1.69897	-1.69897	-1.69897	-1.69897	-1.69897	-2	-1.69897	2.12775	1.92871	-0.69897	-1.82391	-3.30103	-5	-4	-3	-3	-3.30103	-2.69897	-4.30103	-2.09691	-3	5.20833	0.246503	1.18322	0.0682314	0.262656	0.0177354
0.30103	-1.69897	0.477121	2.05994	0.043602	0.69897	0.209783	-1.69897	-1.69897	-1.69897	-1.69897	-1.69897	-1.69897	-1.69897	-1.69897	-1.69897	-1.69897	-1.69897	-1.69897	-1.69897	-1.69897	-1.69897	-1.69897	-1.69897	-1.69897	-2	-1.69897	2.12775	1.97663	-0.69897	-1.82391	-3.30103	-5	-4	-3	-3	-3.30103	-2.69897	-4.30103	-2.09691	-3	5.20833	0.246503	1.14211	0.0411073	0.261628	0.0155632
0.30103	-1.69897	0.477121	2.05994	0.043602	1.69897	0.209783	-1.69897	-1.69897	-1.69897	-1.69897	-1.69897	-1.69897	-1.69897	-1.69897	-1.69897	-1.69897	-1.69897	-1.69897	-1.69897	-1.69897	-1.69897	-1.69897	-1.69897	-1.69897	-2	-1.69897	2.12775	2.26661	-0.69897	-1.82391	-3.30103	-5	-4	-3	-3	-3.30103	-2.69897	-4.30103	-2.09691	-3	6.25	0.322749	1.07282	0.220552	0.318267	0.0725656
0.30103	-1.69897	0.477121	2.05994	0.0434055	-0.30103	0.209783	-1.69897	-1.69897	-1.69897	-1.69897	-1.69897	-1.69897	-1.69897	-1.69897	-1.69897	-1.69897	-1.69897	-1.69897	-1.69897	-1.69897	-1.69897	-1.69897	-1.69897	-1.69897	-2	-1.69897	2.12775	1.93329	-0.69897	-1.82391	-6.30103	-5	-4	-3	-3	-3.30103	-2.69897	-4.30103	-2.09691	-3	5.29167	0.320048	1.18196	0.0820267	0.220044	0.00739473
0.30103	-1.69897	0.477121	2.05994	0.0434252	-0.30103	0.209783	-1.69897	-1.69897	-1.69897	-1.69897	-1.69897	-1.69897	-1.69897	-1.69897	-1.69897	-1.69897	-1.69897	-1.69897	-1.69897	-1.69897	-1.69897	-1.69897	-1.69897	-1.69897	-2	-1.69897	2.12775	1.93329	-0.69897	-1.82391	-4.30103	-5	-4	-3	-3	-3.30103	-2.69897	-4.30103	-2.09691	-3	5.25	0.25	1.17699	0.0945952	0.233906	0.00580463
0.30103	-1.69897	0.477121	2.05994	0.045366	-0.30103	0.209783	-1.69897	-1.69897	-1.69897	-1.69897	-1.69897	-1.69897	-1.69897	-1.69897	-1.69897	-1.69897	-1.69897	-1.69897	-1.69897	-1.69897	-1.69897	-1.69897	-1.69897	-1.69897	-2	-1.69897	2.12775	1.93329	-0.69897	-1.82391	-2.30103	-5	-4	-3	-3	-3.30103	-2.69897	-4.30103	-2.09691	-3	5.125	0.216506	1.25324	0.158478	0.258312	0.00451098
0.30103	-1.69897	0.477121	2.05994	0.0626233	-0.30103	0.209783	-1.69897	-1.69897	-1.69897	-1.69897	-1.69897	-1.69897	-1.69897	-1.69897	-1.69897	-1.69897	-1.69897	-1.69897	-1.69897	-1.69897	-1.69897	-1.69897	-1.69897	-1.69897	-2	-1.69897	2.12775	1.93329	-0.69897	-1.82391	-1.30103	-5	-4	-3	-3	-3.30103	-2.69897	-4.30103	-2.09691	-3	5.54545	0.334021	1.1848	0.0730021	0.258989	0.005032
0.30103	-1.69897	0.477121	2.05994	0.043598	-0.30103	0.209783	-1.69897	-1.69897	-1.69897	-1.69897	-1.69897	-1.69897	-1.69897	-1.69897	-1.69897	-1.69897	-1.69897	-1.69897	-1.69897	-1.69897	-1.69897	-1.69897	-1.69897	-1.69897	-2	-1.69897	2.12775	1.93329	-0.69897	-1.82391	-3.30103	-8	-4	-3	-3	-3.30103	-2.69897	-4.30103	-2.09691	-3	5.375	0.360844	1.18002	0.0842321	0.265933	0.012916
0.30103	-1.69897	0.477121	2.05994	0.0435984	-0.30103	0.209783	-1.69897	-1.69897	-1.69897	-1.69897	-1.69897	-1.69897	-1.69897	-1.69897	-1.69897	-1.69897	-1.69897	-1.69897	-1.69897	-1.69897	-1.69897	-1.69897	-1.69897	-1.69897	-2	-1.69897	2.12775	1.93329	-0.69897	-1.82391	-3.30103	-6	-4	-3	-3	-3.30103	-2.69897	-4.30103	-2.09691	-3	5.29167	0.246503	1.18261	0.0849779	0.254711	0.00505495
0.30103	-1.69897	0.477121	2.05994	0.0436373	-0.30103	0.209783	-1.69897	-1.69897	-1.69897	-1.69897	-1.69897	-1.69897	-1.69897	-1.69897	-1.69897	-1.69897	-1.69897	-1.69897	-1.69897	-1.69897	-1.69897	-1.69897	-1.69897	-1.69897	-2	-1.69897	2.12775	1.93329	-0.69897	-1.82391	-3.30103	-4	-4	-3	-3	-3.30103	-2.69897	-4.30103	-2.09691	-3	5.25	0.25	1.16717	0.0988451	0.261822	0.00567293
0.30103	-1.69897	0.477121	2.05994	0.0439907	-0.30103	0.209783	-1.69897	-1.69897	-1.69897	-1.69897	-1.69897	-1.69897	-1.69897	-1.69897	-1.69897	-1.69897	-1.69897	-1.69897	-1.69897	-1.69897	-1.69897	-1.69897	-1.69897	-1.69897	-2	-1.69897	2.12775	1.93329	-0.69897	-1.82391	-3.30103	-3	-4	-3	-3	-3.30103	-2.69897	-4.30103	-2.09691	-3	5.20833	0.246503	1.23553	0.131675	0.2606	0.00588863
0.30103	-1.69897	0.477121	2.05994	0.043602	-0.30103	0.209783	-1.69897	-1.69897	-1.69897	-1.69897	-1.69897	-1.69897	-1.69897	-1.69897	-1.69897	-1.69897	-1.69897	-1.69897	-1.69897	-1.69897	-1.69897	-1.69897	-1.69897	-1.69897	-2	-1.69897	2.12775	1.93328	-0.69897	-1.82391	-3.30103	-5	-4	-6	-3	-3.30103	-2.69897	-4.30103	-2.09691	-3	5.66667	0.235702	1.15309	0.103698	0.258322	0.0191912
0.30103	-1.69897	0.477121	2.05994	0.043602	-0.30103	0.209783	-1.69897	-1.69897	-1.69897	-1.69897	-1.69897	-1.69897	-1.69897	-1.69897	-1.69897	-1.69897	-1.69897	-1.69897	-1.69897	-1.69897	-1.69897	-1.69897	-1.69897	-1.69897	-2	-1.69897	2.12775	1.93329	-0.69897	-1.82391	-3.30103	-5	-4	-4	-3	-3.30103	-2.69897	-4.30103	-2.09691	-3	5.41667	0.343592	1.16104	0.0862089	0.255822	0.00933614
0.30103	-1.69897	0.477121	2.05994	0.043602	-0.30103	0.209783	-1.69897	-1.69897	-1.69897	-1.69897	-1.69897	-1.69897	-1.69897	-1.69897	-1.69897	-1.69897	-1.69897	-1.69897	-1.69897	-1.69897	-1.69897	-1.69897	-1.69897	-1.69897	-2	-1.69897	2.12775	1.93339	-0.69897	-1.82391	-3.30103	-5	-4	-2	-3	-3.30103	-2.69897	-4.30103	-2.09691	-3	5.625	0.29756	1.19753	0.0942826	0.254221	0.00960037
0.30103	-1.69897	0.477121	2.05994	0.043602	-0.30103	0.209783	-1.69897	-1.69897	-1.69897	-1.69897	-1.69897	-1.69897	-1.69897	-1.69897	-1.69897	-1.69897	-1.69897	-1.69897	-1.69897	-1.69897	-1.69897	-1.69897	-1.69897	-1.69897	-2	-1.69897	2.12775	1.9343	-0.69897	-1.82391	-3.30103	-5	-4	-1	-3	-3.30103	-2.69897	-4.30103	-2.09691	-3	5.5	0.353553	1.10802	0.0436222	0.265294	0.0123712
0.30103	-1.69897	0.477121	2.05994	0.0435627	-0.30103	0.209783	-1.69897	-1.69897	-1.69897	-1.69897	-1.69897	-1.69897	-1.69897	-1.69897	-1.69897	-1.69897	-1.69897	-1.69897	-1.69897	-1.69897	-1.69897	-1.69897	-1.69897	-1.69897	-2	-1.69897	2.12775	1.93329	-0.69897	-1.82391	-3.30103	-5	-7	-3	-3	-3.30103	-2.69897	-4.30103	-2.09691	-3	5.25	0.381881	1.16383	0.0891341	0.2706	0.024586
0.30103	-1.69897	0.477121	2.05994	0.0435666	-0.30103	0.209783	-1.69897	-1.69897	-1.69897	-1.69897	-1.69897	-1.69897	-1.69897	-1.69897	-1.69897	-1.69897	-1.69897	-1.69897	-1.69897	-1.69897	-1.69897	-1.69897	-1.69897	-1.69897	-2	-1.69897	2.12775	1.93329	-0.69897	-1.82391	-3.30103	-5	-5	-3	-3	-3.30103	-2.69897	-4.30103	-2.09691	-3	5.41667	0.343592	1.12459	0.073596	0.263711	0.0160698
0.30103	-1.69897	0.477121	2.05994	0.0439553	-0.30103	0.209783	-1.69897	-1.69897	-1.69897	-1.69897	-1.69897	-1.69897	-1.69897	-1.69897	-1.69897	-1.69897	-1.69897	-1.69897	-1.69897	-1.69897	-1.69897	-1.69897	-1.69897	-1.69897	-2	-1.69897	2.12775	1.93329	-0.69897	-1.82391	-3.30103	-5	-3	-3	-3	-3.30103	-2.69897	-4.30103	-2.09691	-3	5.25	0.322749	1.14401	0.0583007	0.273342	0.0123371
0.30103	-1.69897	0.477121	2.05994	0.0474735	-0.30103	0.209783	-1.69897	-1.69897	-1.69897	-1.69897	-1.69897	-1.69897	-1.69897	-1.69897	-1.69897	-1.69897	-1.69897	-1.69897	-1.69897	-1.69897	-1.69897	-1.69897	-1.69897	-1.69897	-2	-1.69897	2.12775	1.93329	-0.69897	-1.82391	-3.30103	-5	-2	-3	-3	-3.30103	-2.69897	-4.30103	-2.09691	-3	5.41667	0.343592	1.15357	0.0683462	0.267378	0.00917811
0.30103	-1.69897	0.477121	2.05994	0.043602	-0.30103	0.209515	-1.69897	-1.69897	-1.69897	-1.69897	-1.69897	-1.69897	-1.69897	-1.69897	-1.69897	-1.69897	-1.69897	-1.69897	-1.69897	-1.69897	-1.69897	-1.69897	-1.69897	-1.69897	-2	-1.69897	2.12775	1.93329	-0.69897	-1.82391	-3.30103	-5	-4	-3	-6	-3.30103	-2.69897	-4.30103	-2.09691	-3	5.375	0.216506	1.17905	0.0575034	0.2536	0.0197547
0.30103	-1.69897	0.477121	2.05994	0.043602	-0.30103	0.209542	-1.69897	-1.69897	-1.69897	-1.69897	-1.69897	-1.69897	-1.69897	-1.69897	-1.69897	-1.69897	-1.69897	-1.69897	-1.69897	-1.69897	-1.69897	-1.69897	-1.69897	-1.69897	-2	-1.69897	2.12775	1.93329	-0.69897	-1.82391	-3.30103	-5	-4	-3	-4	-3.30103	-2.69897	-4.30103	-2.09691	-3	5.375	0.360844	1.24517	0.0917879	0.300156	0.0505364
0.30103	-1.69897	0.477121	2.05994	0.043602	-0.30103	0.212188	-1.69897	-1.69897	-1.69897	-1.69897	-1.69897	-1.69897	-1.69897	-1.69897	-1.69897	-1.69897	-1.69897	-1.69897	-1.69897	-1.69897	-1.69897	-1.69897	-1.69897	-1.69897	-2	-1.69897	2.12775	1.93329	-0.69897	-1.82391	-3.30103	-5	-4	-3	-2	-3.30103	-2.69897	-4.30103	-2.09691	-3	5.16667	0.311805	1.26321	0.118271	0.274128	0.0337476
0.30103	-1.69897	0.477121	2.05994	0.043602	-0.30103	0.235528	-1.69897	-1.69897	-1.69897	-1.69897	-1.69897	-1.69897	-1.69897	-1.69897	-1.69897	-1.69897	-1.69897	-1.69897	-1.69897	-1.69897	-1.69897	-1.69897	-1.69897	-1.69897	-2	-1.69897	2.12775	1.93329	-0.69897	-1.82391	-3.30103	-5	-4	-3	-1	-3.30103	-2.69897	-4.30103	-2.09691	-3	5.20833	0.246503	1.15617	0.0990319	0.268933	0.0164983
0.30103	-1.69897	0.477121	2.05994	0.043602	-0.30103	0.209783	-1.69897	-1.69897	-1.69897	-1.69897	-1.69897	-1.69897	-1.69897	-1.69897	-1.69897	-1.69897	-1.69897	-1.69897	-1.69897	-1.69897	-1.69897	-1.69897	-1.69897	-1.69897	-2	-1.69897	2.12775	1.93329	-0.69897	-1.82391	-3.30103	-5	-4	-3	-3	-3.30103	-5.69897	-4.30103	-2.09691	-3	5.16667	0.372678	1.16846	0.102969	0.272267	0.0203827
0.30103	-1.69897	0.477121	2.05994	0.043602	-0.30103	0.209783	-1.69897	-1.69897	-1.69897	-1.69897	-1.69897	-1.69897	-1.69897	-1.69897	-1.69897	-1.69897	-1.69897	-1.69897	-1.69897	-1.69897	-1.69897	-1.69897	-1.69897	-1.69897	-2	-1.69897	2.12775	1.93329	-0.69897	-1.82391	-3.30103	-5	-4	-3	-3	-3.30103	-3.69897	-4.30103	-2.09691	-3	5.33333	0.235702	1.23951	0.155486	0.273878	0.0284085
0.30103	-1.69897	0.477121	2.05994	0.043602	-0.30103	0.209783	-1.69897	-1.69897	-1.69897	-1.69897	-1.69897	-1.69897	-1.69897	-1.69897	-1.69897	-1.69897	-1.69897	-1.69897	-1.69897	-1.69897	-1.69897	-1.69897	-1.69897	-1.69897	-2	-1.69897	2.12775	1.93329	-0.69897	-1.82391	-3.30103	-5	-4	-3	-3	-3.30103	-1.69897	-4.30103	-2.09691	-3	5.20833	0.320048	1.20891	0.117288	0.277797	0.0158142
0.30103	-1.69897	0.477121	2.05994	0.043602	-0.30103	0.209783	-1.69897	-1.69897	-1.69897	-1.69897	-1.69897	-1.69897	-1.69897	-1.69897	-1.69897	-1.69897	-1.69897	-1.69897	-1.69897	-1.69897	-1.69897	-1.69897	-1.69897	-1.69897	-2	-1.69897	2.12775	1.93329	-0.69897	-1.82391	-3.30103	-5	-4	-3	-3	-3.30103	-0.69897	-4.30103	-2.09691	-3	5.20833	0.320048	1.17104	0.109786	0.269203	0.0167572
0.30103	-1.69897	0.477121	2.05994	0.043602	-0.30103	0.209783	-1.69897	-1.69897	-1.69897	-1.69897	-1.69897	-1.69897	-1.69897	-1.69897	-1.69897	-1.69897	-1.69897	-1.69897	-1.69897	-1.69897	-1.69897	-1.69897	-1.69897	-1.69897	-2	-1.69897	2.12775	1.93329	-0.69897	-1.82391	-3.30103	-5	-4	-3	-3	-3.30103	-2.69897	-7.30103	-2.09691	-3	5.5	0.288675	1.18776	0.106551	0.291615	0.0591566
0.30103	-1.69897	0.477121	2.05994	0.043602	-0.30103	0.209783	-1.69897	-1.69897	-1.69897	-1.69897	-1.69897	-1.69897	-1.69897	-1.69897	-1.69897	-1.69897	-1.69897	-1.69897	-1.69897	-1.69897	-1.69897	-1.69897	-1.69897	-1.69897	-2	-1.69897	2.12775	1.93329	-0.69897	-1.82391	-3.30103	-5	-4	-3	-3	-3.30103	-2.69897	-5.30103	-2.09691	-3	5.54167	0.246503	1.19224	0.0918918	0.270961	0.0404844
0.30103	-1.69897	0.477121	2.05994	0.043602	-0.30103	0.209783	-1.69897	-1.69897	-1.69897	-1.69897	-1.69897	-1.69897	-1.69897	-1.69897	-1.69897	-1.69897	-1.69897	-1.69897	-1.69897	-1.69897	-1.69897	-1.69897	-1.69897	-1.69897	-2	-1.69897	2.12775	1.93329	-0.69897	-1.82391	-3.30103	-5	-4	-3	-3	-3.30103	-2.69897	-3.30103	-2.09691	-3	5.5	0.353553	1.21708	0.127578	0.252524	0.0124447
0.30103	-1.69897	0.477121	2.05994	0.043602	-0.30103	0.209783	-1.69897	-1.69897	-1.69897	-1.69897	-1.69897	-1.69897	-1.69897	-1.69897	-1.69897	-1.69897	-1.69897	-1.69897	-1.69897	-1.69897	-1.69897	-1.69897	-1.69897	-1.69897	-2	-1.69897	2.12775	1.93329	-0.69897	-1.82391	-3.30103	-5	-4	-3	-3	-3.30103	-2.69897	-2.30103	-2.09691	-3	5.41667	0.343592	1.23029	0.129562	0.253017	0.0134048
0.30103	-1.69897	0.477121	2.05994	0.043602	-0.30103	0.209783	-1.69897	-1.69897	-1.69897	-1.69897	-1.69897	-1.69897	-1.69897	-1.69897	-1.69897	-1.69897	-1.69897	-1.69897	-1.69897	-1.69897	-1.69897	-1.69897	-1.69897	-1.69897	-2	-1.69897	2.12775	1.93329	-0.69897	-1.82391	-3.30103	-5	-4	-3	-3	-6.30103	-2.69897	-4.30103	-2.09691	-3	5.45833	0.320048	1.15216	0.106614	0.262183	0.0183738
0.30103	-1.69897	0.477121	2.05994	0.043602	-0.30103	0.209783	-1.69897	-1.69897	-1.69897	-1.69897	-1.69897	-1.69897	-1.69897	-1.69897	-1.69897	-1.69897	-1.69897	-1.69897	-1.69897	-1.69897	-1.69897	-1.69897	-1.69897	-1.69897	-2	-1.69897	2.12775	1.93329	-0.69897	-1.82391	-3.30103	-5	-4	-3	-3	-4.30103	-2.69897	-4.30103	-2.09691	-3	5.375	0.29756	1.16958	0.0970277	0.259736	0.0145841
0.30103	-1.69897	0.477121	2.05994	0.043602	-0.30103	0.209783	-1.69897	-1.69897	-1.69897	-1.69897	-1.69897	-1.69897	-1.69897	-1.69897	-1.69897	-1.69897	-1.69897	-1.69897	-1.69897	-1.69897	-1.69897	-1.69897	-1.69897	-1.69897	-2	-1.69897	2.12775	1.93329	-0.69897	-1.82391	-3.30103	-5	-4	-3	-3	-2.30103	-2.69897	-4.30103	-2.09691	-3	5.41667	0.276385	1.16384	0.0883599	0.300711	0.0277371
0.30103	-1.69897	0.477121	2.05994	0.043602	-0.30103	0.209783	-1.69897	-1.69897	-1.69897	-1.69897	-1.69897	-1.69897	-1.69897	-1.69897	-1.69897	-1.69897	-1.69897	-1.69897	-1.69897	-1.69897	-1.69897	-1.69897	-1.69897	-1.69897	-2	-1.69897	2.12775	1.93329	-0.69897	-1.82391	-3.30103	-5	-4	-3	-3	-1.30103	-2.69897	-4.30103	-2.09691	-3	5.33333	0.235702	1.17296	0.0980183	0.247711	0.0122753
0.30103	-1.69897	0.477121	2.05994	0.043602	-0.30103	0.209783	-1.69897	-1.69897	-1.69897	-1.69897	-1.69897	-1.69897	-1.69897	-1.69897	-1.69897	-1.69897	-1.69897	-1.69897	-1.69897	-1.69897	-1.69897	-1.69897	-1.69897	-1.69897	-2	-1.69897	2.12775	1.93329	-0.69897	-1.82391	-3.30103	-5	-4	-3	-3	-3.30103	-2.69897	-4.30103	-5.09691	-3	5.41667	0.186339	1.20682	0.0981011	0.282628	0.0345029
0.30103	-1.69897	0.477121	2.05994	0.043602	-0.30103	0.209783	-1.69897	-1.69897	-1.69897	-1.69897	-1.69897	-1.69897	-1.69897	-1.69897	-1.69897	-1.69897	-1.69897	-1.69897	-1.69897	-1.69897	-1.69897	-1.69897	-1.69897	-1.69897	-2	-1.69897	2.12775	1.93329	-0.69897	-1.82391	-3.30103	-5	-4	-3	-3	-3.30103	-2.69897	-4.30103	-3.09691	-3	5.29167	0.246503	1.168	0.0688078	0.278239	0.0476316
0.30103	-1.69897	0.477121	2.05994	0.043602	-0.30103	0.209783	-1.69897	-1.69897	-1.69897	-1.69897	-1.69897	-1.69897	-1.69897	-1.69897	-1.69897	-1.69897	-1.69897	-1.69897	-1.69897	-1.69897	-1.69897	-1.69897	-1.69897	-1.69897	-2	-1.69897	2.12775	1.93329	-0.69897	-1.82391	-3.30103	-5	-4	-3	-3	-3.30103	-2.69897	-4.30103	-1.09691	-3	5.33333	0.235702	1.12847	0.073329	0.263767	0.0135742
0.30103	-1.69897	0.477121	2.05994	0.043602	-0.30103	0.209783	-1.69897	-1.69897	-1.69897	-1.69897	-1.69897	-1.69897	-1.69897	-1.69897	-1.69897	-1.69897	-1.69897	-1.69897	-1.69897	-1.69897	-1.69897	-1.69897	-1.69897	-1.69897	-2	-1.69897	2.12775	1.93329	-0.69897	-1.82391	-3.30103	-5	-4	-3	-3	-3.30103	-2.69897	-4.30103	-0.09691	-3	5.45833	0.246503	1.12376	0.0487685	0.275888	0.0189711
0.30103	-1.69897	0.477121	2.05994	0.043602	-0.30103	0.209783	-1.69897	-1.69897	-1.69897	-1.69897	-1.69897	-1.69897	-1.69897	-1.69897	-1.69897	-1.69897	-1.69897	-1.69897	-1.69897	-1.69897	-1.69897	-1.69897	-1.69897	-1.69897	-2	-1.69897	2.12775	1.93329	-0.69897	-1.82391	-3.30103	-5	-4	-3	-3	-3.30103	-2.69897	-4.30103	-2.09691	-6	5.375	0.216506	1.21113	0.0862025	0.278294	0.037329
0.30103	-1.69897	0.477121	2.05994	0.043602	-0.30103	0.209783	-1.69897	-1.69897	-1.69897	-1.69897	-1.69897	-1.69897	-1.69897	-1.69897	-1.69897	-1.69897	-1.69897	-1.69897	-1.69897	-1.69897	-1.69897	-1.69897	-1.69897	-1.69897	-2	-1.69897	2.12775	1.93329	-0.69897	-1.82391	-3.30103	-5	-4	-3	-3	-3.30103	-2.69897	-4.30103	-2.09691	-4	5.41667	0.186339	1.13662	0.0576921	0.263461	0.0128629
0.30103	-1.69897	0.477121	2.05994	0.043602	-0.30103	0.209783	-1.69897	-1.69897	-1.69897	-1.69897	-1.69897	-1.69897	-1.69897	-1.69897	-1.69897	-1.69897	-1.69897	-1.69897	-1.69897	-1.69897	-1.69897	-1.69897	-1.69897	-1.69897	-2	-1.69897	2.12775	1.93329	-0.69897	-1.82391	-3.30103	-5	-4	-3	-3	-3.30103	-2.69897	-4.30103	-2.09691	-2	5.33333	0.235702	1.19323	0.115762	0.279433	0.012945
0.30103	-1.69897	0.477121	2.05994	0.043602	-0.30103	0.209783	-1.69897	-1.69897	-1.69897	-1.69897	-1.69897	-1.69897	-1.69897	-1.69897	-1.69897	-1.69897	-1.69897	-1.69897	-1.69897	-1.69897	-1.69897	-1.69897	-1.69897	-1.69897	-2	-1.69897	2.12775	1.93329	-0.69897	-1.82391	-3.30103	-5	-4	-3	-3	-3.30103	-2.69897	-4.30103	-2.09691	-1	5.5	0	1.13372	0.0900734	0.265044	0.0103815
1.30103	0.30103	0.477121	-1	1.04356	-3.30103	1.00996	0.30103	-0.69897	0.30103	-0.69897	-4.69897	0.30103	0.30103	-1.69897	-2.69897	-2.69897	0.30103	-1.69897	-4.69897	-1.69897	0.30103	0.30103	-1.69897	0.30103	0	-0.69897	0.334755	0.845222	1.04139	0.0211893	-2.30103	-4	-5	-3	-2	-2.30103	-2.69897	-7.30103	-0.09691	-6	0	0	0	0	0	0
1.30103	0.30103	0.477121	1.48839	1.04356	-3.30103	1.00996	0.30103	-0.69897	0.30103	-0.69897	-4.69897	0.30103	0.30103	-1.69897	-2.69897	-2.69897	0.30103	-1.69897	-4.69897	-1.69897	0.30103	0.30103	-1.69897	0.30103	0	-0.69897	1.80304	0.845222	1.04139	0.0211893	-2.30103	-4	-5	-3	-2	-2.30103	-2.69897	-7.30103	-0.09691	-6	21.8958	1.56777	0.657699	0.0502902	1.22894	0.0363484
1.30103	0.30103	0.477121	1.78915	1.04356	-3.30103	1.00996	0.30103	-0.69897	0.30103	-0.69897	-4.69897	0.30103	0.30103	-1.69897	-2.69897	-2.69897	0.30103	-1.69897	-4.69897	-1.69897	0.30103	0.30103	-1.69897	0.30103	0	-0.69897	2.09704	0.845222	1.04139	0.0211893	-2.30103	-4	-5	-3	-2	-2.30103	-2.69897	-7.30103	-0.09691	-6	19.4464	6.7696	0.551532	0.160215	1.23504	0.0293897
1.30103	0.30103	0.477121	1.96515	1.04356	-3.30103	1.00996	0.30103	-0.69897	0.30103	-0.69897	-4.69897	0.30103	0.30103	-1.69897	-2.69897	-2.69897	0.30103	-1.69897	-4.69897	-1.69897	0.30103	0.30103	-1.69897	0.30103	0	-0.69897	2.27077	0.845222	1.04139	0.0211893	-2.30103	-4	-5	-3	-2	-2.30103	-2.69897	-7.30103	-0.09691	-6	21.5833	0.606676	0.529252	0.0285407	1.21607	0.0277136
1.30103	0.30103	0.477121	2.09004	1.04356	-3.30103	1.00996	0.30103	-0.69897	0.30103	-0.69897	-4.69897	0.30103	0.30103	-1.69897	-2.69897	-2.69897	0.30103	-1.69897	-4.69897	-1.69897	0.30103	0.30103	-1.69897	0.30103	0	-0.69897	2.39452	0.845222	1.04139	0.0211893	-2.30103	-4	-5	-3	-2	-2.30103	-2.69897	-7.30103	-0.09691	-6	29.7917	3.21104	0.259836	0.0515249	1.23543	0
1.30103	0.30103	0.477121	1.86034	1.04356	-3.30103	1.00996	0.30103	-0.69897	0.30103	-0.69897	-4.69897	0.30103	0.30103	-1.69897	-2.69897	-2.69897	0.30103	-1.69897	-4.69897	-1.69897	0.30103	0.30103	-1.69897	0.30103	0	-0.69897	2.13354	0.845222	1.04139	0.0211893	-2.30103	-4	-5	-3	-2	-2.30103	-2.69897	-7.30103	-0.09691	-6	19.4167	0.571305	0.684606	0.0292213	1.2531	0.00761942
1.30103	0.30103	0.477121	1.92169	1.04356	-3.30103	1.00996	0.30103	-0.69897	0.30103	-0.69897	-4.69897	0.30103	0.30103	-1.69897	-2.69897	-2.69897	0.30103	-1.69897	-4.69897	-1.69897	0.30103	0.30103	-1.69897	0.30103	0	-0.69897	2.16732	0.845222	1.04139	0.0211893	-2.30103	-4	-5	-3	-2	-2.30103	-2.69897	-7.30103	-0.09691	-6	18.8333	0.471405	0.664843	0.0164069	1.23091	0.0130402
1.30103	0.30103	0.477121	2	1.04356	-3.30103	1.00996	0.30103	-0.69897	0.30103	-0.69897	-4.69897	0.30103	0.30103	-1.69897	-2.69897	-2.69897	0.30103	-1.69897	-4.69897	-1.69897	0.30103	0.30103	-1.69897	0.30103	0	-0.69897	2.21352	0.845222	1.04139	0.0211893	-2.30103	-4	-5	-3	-2	-2.30103	-2.69897	-7.30103	-0.09691	-6	17.2917	0.476897	0.677584	0.0214838	1.06239	0.0399678
1.30103	0.30103	0.477121	2.14145	1.04356	-3.30103	1.00996	0.30103	-0.69897	0.30103	-0.69897	-4.69897	0.30103	0.30103	-1.69897	-2.69897	-2.69897	0.30103	-1.69897	-4.69897	-1.69897	0.30103	0.30103	-1.69897	0.30103	0	-0.69897	2.30535	0.845222	1.04139	0.0211893	-2.30103	-4	-5	-3	-2	-2.30103	-2.69897	-7.30103	-0.09691	-6	16.3333	0.552771	0.685818	0.0284604	0.851822	0.0517948
1.30103	0.30103	0.477121	1.80382	1.04356	-3.30103	1.00996	0.30103	-0.69897	0.30103	-0.69897	-4.69897	0.30103	0.30103	-1.69897	-2.69897	-2.69897	0.30103	-1.69897	-4.69897	-1.69897	0.30103	0.30103	-1.69897	0.30103	0	-0.69897	2.09704	1.05046	1.04139	0.0211893	-2.30103	-4	-5	-3	-2	-2.30103	-2.69897	-7.30103	-0.09691	-6	21.1667	0.513701	0.667485	0.0124554	1.28188	0.0127514
1.30103	0.30103	0.477121	1.91745	1.04356	-3.30103	1.00996	0.30103	-0.69897	0.30103	-0.69897	-4.69897	0.30103	0.30103	-1.69897	-2.69897	-2.69897	0.30103	-1.69897	-4.69897	-1.69897	0.30103	0.30103	-1.69897	0.30103	0	-0.69897	2.09704	1.69286	1.04139	0.0211893	-2.30103	-4	-5	-3	-2	-2.30103	-2.69897	-7.30103	-0.09691	-6	18.75	0.381881	0.646208	0.0143251	1.27229	0.0125207
1.30103	0.30103	0.477121	2.01636	1.04356	-3.30103	1.00996	0.30103	-0.69897	0.30103	-0.69897	-4.69897	0.30103	0.30103	-1.69897	-2.69897	-2.69897	0.30103	-1.69897	-4.69897	-1.69897	0.30103	0.30103	-1.69897	0.30103	0	-0.69897	2.09704	1.9619	1.04139	0.0211893	-2.30103	-4	-5	-3	-2	-2.30103	-2.69897	-7.30103	-0.09691	-6	17.4583	0.557462	0.658397	0.0172409	1.14907	0.028545
1.30103	0.30103	0.477121	2.09687	1.04356	-3.30103	1.00996	0.30103	-0.69897	0.30103	-0.69897	-4.69897	0.30103	0.30103	-1.69897	-2.69897	-2.69897	0.30103	-1.69897	-4.69897	-1.69897	0.30103	0.30103	-1.69897	0.30103	0	-0.69897	2.09704	2.12679	1.04139	0.0211893	-2.30103	-4	-5	-3	-2	-2.30103	-2.69897	-7.30103	-0.09691	-6	16.4167	0.448764	0.717682	0.0294203	1.0991	0.001
1.30103	0.30103	0.477121	2.16476	1.04356	-3.30103	1.00996	0.30103	-0.69897	0.30103	-0.69897	-4.69897	0.30103	0.30103	-1.69897	-2.69897	-2.69897	0.30103	-1.69897	-4.69897	-1.69897	0.30103	0.30103	-1.69897	0.30103	0	-0.69897	2.09704	2.24601	1.04139	0.0211893	-2.30103	-4	-5	-3	-2	-2.30103	-2.69897	-7.30103	-0.09691	-6	16.2083	0.379601	0.670959	0.0243311	0.874433	0.00233333
-1.69897	0.30103	0.477121	1.78915	1.04356	-3.30103	1.00996	0.30103	-0.69897	0.30103	-0.69897	-4.69897	0.30103	0.30103	-1.69897	-2.69897	-2.69897	0.30103	-1.69897	-4.69897	-1.69897	0.30103	0.30103	-1.69897	0.30103	0	-0.69897	2.09704	0.845222	1.04139	0.0211893	-2.30103	-4	-5	-3	-2	-2.30103	-2.69897	-7.30103	-0.09691	-6	28.2917	0.627772	0.338639	0.012285
-0.657577	0.30103	0.477121	1.78915	1.04356	-3.30103	1.00996	0.30103	-0.69897	0.30103	-0.69897	-4.69897	0.30103	0.30103	-1.69897	-2.69897	-2.69897	0.30103	-1.69897	-4.69897	-1.69897	0.30103	0.30103	-1.69897	0.30103	0	-0.69897	2.09704	0.845222	1.04139	0.0211893	-2.30103	-4	-5	-3	-2	-2.30103	-2.69897	-7.30103	-0.09691	-6	22.3333	0.471405	0.387044	0.0177483
0.30103	0.30103	0.477121	1.78915	1.04356	-3.30103	1.00996	0.30103	-0.69897	0.30103	-0.69897	-4.69897	0.30103	0.30103	-1.69897	-2.69897	-2.69897	0.30103	-1.69897	-4.69897	-1.69897	0.30103	0.30103	-1.69897	0.30103	0	-0.69897	2.09704	0.845222	1.04139	0.0211893	-2.30103	-4	-5	-3	-2	-2.30103	-2.69897	-7.30103	-0.09691	-6	20.7917	8.98021	0.268783	0.0686233	0.842778	0.0268877
1.60206	0.30103	0.477121	1.78915	1.04356	-3.30103	1.00996	0.30103	-0.69897	0.30103	-0.69897	-4.69897	0.30103	0.30103	-1.69897	-2.69897	-2.69897	0.30103	-1.69897	-4.69897	-1.69897	0.30103	0.30103	-1.69897	0.30103	0	-0.69897	2.09704	0.845222	1.04139	0.0211893	-2.30103	-4	-5	-3	-2	-2.30103	-2.69897	-7.30103	-0.09691	-6	20.625	0.360844	0.642166	0.00932926	1.2382	0.0176839
2.30103	0.30103	0.477121	1.78915	1.04356	-3.30103	1.00996	0.30103	-0.69897	0.30103	-0.69897	-4.69897	0.30103	0.30103	-1.69897	-2.69897	-2.69897	0.30103	-1.69897	-4.69897	-1.69897	0.30103	0.30103	-1.69897	0.30103	0	-0.69897	2.09704	0.845222	1.04139	0.0211893	-2.30103	-4	-5	-3	-2	-2.30103	-2.69897	-7.30103	-0.09691	-6	19	0.408248	0.714786	0.0145292	1.03052	0.0212163
1.30103	0.30103	0.0128372	1.78915	1.00303	-3.30103	1.00996	0.30103	-0.69897	0.30103	-0.69897	-4.69897	0.30103	0.30103	-1.69897	-2.69897	-2.69897	0.30103	-1.69897	-4.69897	-1.69897	0.30103	0.30103	-1.69897	0.30103	0	-0.69897	2.09704	0.845222	1.04139	0.0211893	-2.30103	-4	-5	-3	-2	-2.30103	-2.69897	-7.30103	-0.09691	-6	21.1667	0.235702	0.488621	0.00656812	1.2287	0.00860594
1.30103	0.30103	0.0899051	1.78915	1.00733	-3.30103	1.00996	0.30103	-0.69897	0.30103	-0.69897	-4.69897	0.30103	0.30103	-1.69897	-2.69897	-2.69897	0.30103	-1.69897	-4.69897	-1.69897	0.30103	0.30103	-1.69897	0.30103	0	-0.69897	2.09704	0.845222	1.04139	0.0211893	-2.30103	-4	-5	-3	-2	-2.30103	-2.69897	-7.30103	-0.09691	-6	23.125	2.67804	0.474447	0.1565	1.24193	0.00116667
1.30103	0.30103	1.04139	1.78915	1.17768	-3.30103	1.00996	0.30103	-0.69897	0.30103	-0.69897	-4.69897	0.30103	0.30103	-1.69897	-2.69897	-2.69897	0.30103	-1.69897	-4.69897	-1.69897	0.30103	0.30103	-1.69897	0.30103	0	-0.69897	2.09704	0.845222	1.04139	0.0211893	-2.30103	-4	-5	-3	-2	-2.30103	-2.69897	-7.30103	-0.09691	-6	18.9583	0.431003	0.719992	0.0105861	1.25354	0.00967943
1.30103	0.30103	1.32222	1.78915	1.30223	-3.30103	1.00996	0.30103	-0.69897	0.30103	-0.69897	-4.69897	0.30103	0.30103	-1.69897	-2.69897	-2.69897	0.30103	-1.69897	-4.69897	-1.69897	0.30103	0.30103	-1.69897	0.30103	0	-0.69897	2.09704	0.845222	1.04139	0.0211893	-2.30103	-4	-5	-3	-2	-2.30103	-2.69897	-7.30103	-0.09691	-6	18	0.353553	0.754786	0.0149381	1.22591	0.0192067
1.30103	0.30103	2.3032	1.78915	2.04161	-3.30103	1.00996	0.30103	-0.69897	0.30103	-0.69897	-4.69897	0.30103	0.30103	-1.69897	-2.69897	-2.69897	0.30103	-1.69897	-4.69897	-1.69897	0.30103	0.30103	-1.69897	0.30103	0	-0.69897	2.09704	0.845222	1.04139	0.0211893	-2.30103	-4	-5	-3	-2	-2.30103	-2.69897	-7.30103	-0.09691	-6	14.4091	0.514259	0.792077	0.052633	0.824191	0.0263401
1.30103	0.30103	0.30103	1.78915	1.04356	-3.30103	0.965296	0.30103	-0.69897	0.30103	-0.69897	-4.69897	0.30103	0.30103	-1.69897	-2.69897	-2.69897	0.30103	-1.69897	-4.69897	-1.69897	0.30103	0.30103	-1.69897	0.30103	0	-0.69897	2.09704	0.845222	1.04139	0.0211893	-2.30103	-4	-5	-3	-2	-2.30103	-2.69897	-7.30103	-0.09691	-6	22	0	0.411511	0	1.249	0
1.30103	0.30103	0.322219	1.78915	1.04356	-3.30103	0.969975	0.30103	-0.69897	0.30103	-0.69897	-4.69897	0.30103	0.30103	-1.69897	-2.69897	-2.69897	0.30103	-1.69897	-4.69897	-1.69897	0.30103	0.30103	-1.69897	0.30103	0	-0.69897	2.09704	0.845222	1.04139	0.0211893	-2.30103	-4	-5	-3	-2	-2.30103	-2.69897	-7.30103	-0.09691	-6	20.25	0.25	0.548494	0.0295825	1.24066	0.00994739
1.30103	0.30103	0.845098	1.78915	1.04356	-3.30103	1.15327	0.30103	-0.69897	0.30103	-0.69897	-4.69897	0.30103	0.30103	-1.69897	-2.69897	-2.69897	0.30103	-1.69897	-4.69897	-1.69897	0.30103	0.30103	-1.69897	0.30103	0	-0.69897	2.09704	0.845222	1.04139	0.0211893	-2.30103	-4	-5	-3	-2	-2.30103	-2.69897	-7.30103	-0.09691	-6	18.875	0.360844	0.583857	0.04693	1.28371	0.024565
1.30103	0.30103	1.07918	1.78915	1.04356	-3.30103	1.28402	0.30103	-0.69897	0.30103	-0.69897	-4.69897	0.30103	0.30103	-1.69897	-2.69897	-2.69897	0.30103	-1.69897	-4.69897	-1.69897	0.30103	0.30103	-1.69897	0.30103	0	-0.69897	2.09704	0.845222	1.04139	0.0211893	-2.30103	-4	-5	-3	-2	-2.30103	-2.69897	-7.30103	-0.09691	-6	18.5833	0.343592	0.678371	0.0376232	1.24496	0.0244818
1.30103	0.30103	2.0086	1.78915	1.04356	-3.30103	2.03835	0.30103	-0.69897	0.30103	-0.69897	-4.69897	0.30103	0.30103	-1.69897	-2.69897	-2.69897	0.30103	-1.69897	-4.69897	-1.69897	0.30103	0.30103	-1.69897	0.30103	0	-0.69897	2.09704	0.845222	1.04139	0.0211893	-2.30103	-4	-5	-3	-2	-2.30103	-2.69897	-7.30103	-0.09691	-6
1.30103	0.30103	0.477121	1.78915	1.04356	-3.30103	1.00996	-4.69897	-0.69897	0.30103	-0.69897	-4.69897	0.30103	0.30103	-1.69897	-2.69897	-2.69897	0.30103	-1.69897	-4.69897	-1.69897	0.30103	0.30103	-1.69897	0.30103	0	-0.69897	2.09704	0.845222	1.04139	0.0211893	-2.30103	-4	-5	-3	-2	-2.30103	-2.69897	-7.30103	-0.09691	-6	20.9583	0.518746	0.527902	0.0368313	1.23293	0.00910484
1.30103	0.30103	0.477121	1.78915	1.04356	-3.30103	1.00996	-2.69897	-0.69897	0.30103	-0.69897	-4.69897	0.30103	0.30103	-1.69897	-2.69897	-2.69897	0.30103	-1.69897	-4.69897	-1.69897	0.30103	0.30103	-1.69897	0.30103	0	-0.69897	2.09704	0.845222	1.04139	0.0211893	-2.30103	-4	-5	-3	-2	-2.30103	-2.69897	-7.30103	-0.09691	-6	20.5	0.57735	0.597947	0.0359464	1.28257	0.00678432
1.30103	0.30103	0.477121	1.78915	1.04356	-3.30103	1.00996	-1.69897	-0.69897	0.30103	-0.69897	-4.69897	0.30103	0.30103	-1.69897	-2.69897	-2.69897	0.30103	-1.69897	-4.69897	-1.69897	0.30103	0.30103	-1.69897	0.30103	0	-0.69897	2.09704	0.845222	1.04139	0.0211893	-2.30103	-4	-5	-3	-2	-2.30103	-2.69897	-7.30103	-0.09691	-6	21.125	0.360844	0.504891	0.0143084	1.24943	0.00930352
1.30103	0.30103	0.477121	1.78915	1.04356	-3.30103	1.00996	-0.69897	-0.69897	0.30103	-0.69897	-4.69897	0.30103	0.30103	-1.69897	-2.69897	-2.69897	0.30103	-1.69897	-4.69897	-1.69897	0.30103	0.30103	-1.69897	0.30103	0	-0.69897	2.09704	0.845222	1.04139	0.0211893	-2.30103	-4	-5	-3	-2	-2.30103	-2.69897	-7.30103	-0.09691	-6	21.875	0.505181	0.559462	0.0452496	1.25332	0.0118128
1.30103	0.30103	0.477121	1.78915	1.04356	-3.30103	1.00996	0.60206	-0.69897	0.30103	-0.69897	-4.69897	0.30103	0.30103	-1.69897	-2.69897	-2.69897	0.30103	-1.69897	-4.69897	-1.69897	0.30103	0.30103	-1.69897	0.30103	0	-0.69897	2.09704	0.845222	1.04139	0.0211893	-2.30103	-4	-5	-3	-2	-2.30103	-2.69897	-7.30103	-0.09691	-6	21.2917	0.476897	0.619541	0.032728	1.24124	0.0503174
1.30103	0.30103	0.477121	1.78915	1.04356	-3.30103	1.00139	0.30103	-4.69897	0.30103	-0.69897	-4.69897	0.30103	0.30103	-1.69897	-2.69897	-2.69897	0.30103	-1.69897	-4.69897	-1.69897	0.30103	0.30103	-1.69897	0.30103	0	-0.69897	2.09704	0.845222	1.04139	0.0211893	-2.30103	-4	-5	-3	-2	-2.30103	-2.69897	-7.30103	-0.09691	-6	21.625	0.544862	0.528802	0.0142219	1.24824	0.0160436
1.30103	0.30103	0.477121	1.78915	1.04356	-3.30103	1.00147	0.30103	-2.69897	0.30103	-0.69897	-4.69897	0.30103	0.30103	-1.69897	-2.69897	-2.69897	0.30103	-1.69897	-4.69897	-1.69897	0.30103	0.30103	-1.69897	0.30103	0	-0.69897	2.09704	0.845222	1.04139	0.0211893	-2.30103	-4	-5	-3	-2	-2.30103	-2.69897	-7.30103	-0.09691	-6	21.375	0.505181	0.541799	0.0207551	1.25727	0.0129483
1.30103	0.30103	0.477121	1.78915	1.04356	-3.30103	1.00225	0.30103	-1.69897	0.30103	-0.69897	-4.69897	0.30103	0.30103	-1.69897	-2.69897	-2.69897	0.30103	-1.69897	-4.69897	-1.69897	0.30103	0.30103	-1.69897	0.30103	0	-0.69897	2.09704	0.845222	1.04139	0.0211893	-2.30103	-4	-5	-3	-2	-2.30103	-2.69897	-7.30103	-0.09691	-6	21	0.540062	0.532955	0.0118808	1.27799	0.00968134
1.30103	0.30103	0.477121	1.78915	1.04356	-3.30103	1.04265	0.30103	0	0.30103	-0.69897	-4.69897	0.30103	0.30103	-1.69897	-2.69897	-2.69897	0.30103	-1.69897	-4.69897	-1.69897	0.30103	0.30103	-1.69897	0.30103	0	-0.69897	2.09704	0.845222	1.04139	0.0211893	-2.30103	-4	-5	-3	-2	-2.30103	-2.69897	-7.30103	-0.09691	-6	19.875	9.82159	0.34721	0.160696	1.28073	0.010929
1.30103	0.30103	0.477121	1.78915	1.04356	-3.30103	1.08034	0.30103	0.30103	0.30103	-0.69897	-4.69897	0.30103	0.30103	-1.69897	-2.69897	-2.69897	0.30103	-1.69897	-4.69897	-1.69897	0.30103	0.30103	-1.69897	0.30103	0	-0.69897	2.09704	0.845222	1.04139	0.0211893	-2.30103	-4	-5	-3	-2	-2.30103	-2.69897	-7.30103	-0.09691	-6	21.5833	0.343592	0.675491	0.0101619	1.3076	0.0202702
1.30103	0.30103	0.477121	1.78915	1.04356	-3.30103	1.00996	0.30103	-0.69897	-4.69897	-0.69897	-4.69897	0.30103	0.30103	-1.69897	-2.69897	-2.69897	0.30103	-1.69897	-4.69897	-1.69897	0.30103	0.30103	-1.69897	0.30103	0	-0.69897	2.09704	0.845222	1.04139	0.0211893	-2.30103	-4	-5	-3	-2	-2.30103	-2.69897	-7.30103	-0.09691	-6	14.7083	0.246503	0.6804	0.031631	1.25338	0.0160213
1.30103	0.30103	0.477121	1.78915	1.04356	-3.30103	1.00996	0.30103	-0.69897	-2.69897	-0.69897	-4.69897	0.30103	0.30103	-1.69897	-2.69897	-2.69897	0.30103	-1.69897	-4.69897	-1.69897	0.30103	0.30103	-1.69897	0.30103	0	-0.69897	2.09704	0.845222	1.04139	0.0211893	-2.30103	-4	-5	-3	-2	-2.30103	-2.69897	-7.30103	-0.09691	-6	15.0909	0.192847	0.538084	0.0259352	1.22583	0.00642724
1.30103	0.30103	0.477121	1.78915	1.04356	-3.30103	1.00996	0.30103	-0.69897	-1.69897	-0.69897	-4.69897	0.30103	0.30103	-1.69897	-2.69897	-2.69897	0.30103	-1.69897	-4.69897	-1.69897	0.30103	0.30103	-1.69897	0.30103	0	-0.69897	2.09704	0.845222	1.04139	0.0211893	-2.30103	-4	-5	-3	-2	-2.30103	-2.69897	-7.30103	-0.09691	-6	15.1667	0.513701	0.672273	0.00991727	1.25785	0.0207994
1.30103	0.30103	0.477121	1.78915	1.04356	-3.30103	1.00996	0.30103	-0.69897	-0.69897	-0.69897	-4.69897	0.30103	0.30103	-1.69897	-2.69897	-2.69897	0.30103	-1.69897	-4.69897	-1.69897	0.30103	0.30103	-1.69897	0.30103	0	-0.69897	2.09704	0.845222	1.04139	0.0211893	-2.30103	-4	-5	-3	-2	-2.30103	-2.69897	-7.30103	-0.09691	-6	15.3333	0.471405	0.562237	0.010503	1.20916	0.0128386
1.30103	0.30103	0.477121	1.78915	1.04356	-3.30103	1.00996	0.30103	-0.69897	0.60206	-0.69897	-4.69897	0.30103	0.30103	-1.69897	-2.69897	-2.69897	0.30103	-1.69897	-4.69897	-1.69897	0.30103	0.30103	-1.69897	0.30103	0	-0.69897	2.09704	0.845222	1.04139	0.0211893	-2.30103	-4	-5	-3	-2	-2.30103	-2.69897	-7.30103	-0.09691	-6	15.25	0.433013	0.635039	0.0193878	1.30932	0.0131081
1.30103	0.30103	0.477121	1.78915	1.04356	-3.30103	1.00996	0.30103	-0.69897	0.30103	-4.69897	-4.69897	0.30103	0.30103	-1.69897	-2.69897	-2.69897	0.30103	-1.69897	-4.69897	-1.69897	0.30103	0.30103	-1.69897	0.30103	0	-0.69897	2.09704	0.845222	1.04139	0.0211893	-2.30103	-4	-5	-3	-2	-2.30103	-2.69897	-7.30103	-0.09691	-6	16.5417	0.431003	0.54789	0.0191954	1.25435	0.0131474
1.30103	0.30103	0.477121	1.78915	1.04356	-3.30103	1.00996	0.30103	-0.69897	0.30103	-2.69897	-4.69897	0.30103	0.30103	-1.69897	-2.69897	-2.69897	0.30103	-1.69897	-4.69897	-1.69897	0.30103	0.30103	-1.69897	0.30103	0	-0.69897	2.09704	0.845222	1.04139	0.0211893	-2.30103	-4	-5	-3	-2	-2.30103	-2.69897	-7.30103	-0.09691	-6	15.9583	0.627772	0.618169	0.0240281	1.26346	0.0111542
1.30103	0.30103	0.477121	1.78915	1.04356	-3.30103	1.00996	0.30103	-0.69897	0.30103	-1.69897	-4.69897	0.30103	0.30103	-1.69897	-2.69897	-2.69897	0.30103	-1.69897	-4.69897	-1.69897	0.30103	0.30103	-1.69897	0.30103	0	-0.69897	2.09704	0.845222	1.04139	0.0211893	-2.30103	-4	-5	-3	-2	-2.30103	-2.69897	-7.30103	-0.09691	-6	15.0417	0.431003	0.751504	0.00557773	1.29141	0.0195455
1.30103	0.30103	0.477121	1.78915	1.04356	-3.30103	1.00996	0.30103	-0.69897	0.30103	0	-4.69897	0.30103	0.30103	-1.69897	-2.69897	-2.69897	0.30103	-1.69897	-4.69897	-1.69897	0.30103	0.30103	-1.69897	0.30103	0	-0.69897	2.09704	0.845222	1.04139	0.0211893	-2.30103	-4	-5	-3	-2	-2.30103	-2.69897	-7.30103	-0.09691	-6	14.875	0.360844	0.774806	0.010235	1.30254	0.00682226
1.30103	0.30103	0.477121	1.78915	1.04356	-3.30103	1.00996	0.30103	-0.69897	0.30103	0.30103	-4.69897	0.30103	0.30103	-1.69897	-2.69897	-2.69897	0.30103	-1.69897	-4.69897	-1.69897	0.30103	0.30103	-1.69897	0.30103	0	-0.69897	2.09704	0.845222	1.04139	0.0211893	-2.30103	-4	-5	-3	-2	-2.30103	-2.69897	-7.30103	-0.09691	-6	14.5417	0.379601	0.795425	0.0167778	1.32541	0.0146056
1.30103	0.30103	0.477121	1.78915	1.04356	-3.30103	1.01	0.30103	-0.69897	0.30103	-0.69897	-3	0.30103	0.30103	-1.69897	-2.69897	-2.69897	0.30103	-1.69897	-4.69897	-1.69897	0.30103	0.30103	-1.69897	0.30103	0	-0.69897	2.09704	0.845222	1.04139	0.0211893	-2.30103	-4	-5	-3	-2	-2.30103	-2.69897	-7.30103	-0.09691	-6	21.375	0.544862	0.601913	0.00956858	1.25866	0.0101674
1.30103	0.30103	0.477121	1.78915	1.04356	-3.30103	1.01005	0.30103	-0.69897	0.30103	-0.69897	-2.69897	0.30103	0.30103	-1.69897	-2.69897	-2.69897	0.30103	-1.69897	-4.69897	-1.69897	0.30103	0.30103	-1.69897	0.30103	0	-0.69897	2.09704	0.845222	1.04139	0.0211893	-2.30103	-4	-5	-3	-2	-2.30103	-2.69897	-7.30103	-0.09691	-6	21.3333	0.311805	0.613061	0.0262831	1.26682	0.01565
1.30103	0.30103	0.477121	1.78915	1.04356	-3.30103	1.01081	0.30103	-0.69897	0.30103	-0.69897	-1.69897	0.30103	0.30103	-1.69897	-2.69897	-2.69897	0.30103	-1.69897	-4.69897	-1.69897	0.30103	0.30103	-1.69897	0.30103	0	-0.69897	2.09704	0.845222	1.04139	0.0211893	-2.30103	-4	-5	-3	-2	-2.30103	-2.69897	-7.30103	-0.09691	-6	24.75	0.661438	0.661221	0.0277575	1.25135	0.014763
1.30103	0.30103	0.477121	1.78915	1.04356	-3.30103	1.01837	0.30103	-0.69897	0.30103	-0.69897	-0.69897	0.30103	0.30103	-1.69897	-2.69897	-2.69897	0.30103	-1.69897	-4.69897	-1.69897	0.30103	0.30103	-1.69897	0.30103	0	-0.69897	2.09704	0.845222	1.04139	0.0211893	-2.30103	-4	-5	-3	-2	-2.30103	-2.69897	-7.30103	-0.09691	-6	27.0417	0.431003	0.680886	0.022036	1.27227	0.0145465
1.30103	0.30103	0.477121	1.78915	1.04356	-3.30103	1.0875	0.30103	-0.69897	0.30103	-0.69897	0.30103	0.30103	0.30103	-1.69897	-2.69897	-2.69897	0.30103	-1.69897	-4.69897	-1.69897	0.30103	0.30103	-1.69897	0.30103	0	-0.69897	2.09704	0.845222	1.04139	0.0211893	-2.30103	-4	-5	-3	-2	-2.30103	-2.69897	-7.30103	-0.09691	-6	22.625	0.360844	0.691529	0.0238369	1.2151	0.0416268
1.30103	0.30103	0.477121	1.78915	1.04356	-3.30103	0.915505	0.30103	-0.69897	0.30103	-0.69897	-4.69897	-4.69897	0.30103	-1.69897	-2.69897	-2.69897	0.30103	-1.69897	-4.69897	-1.69897	0.30103	0.30103	-1.69897	0.30103	0	-0.69897	2.09704	0.845222	1.04139	0.0211893	-2.30103	-4	-5	-3	-2	-2.30103	-2.69897	-7.30103	-0.09691	-6	6.79167	10.7499	0.305452	0.175053	1.07235	0.0333482
1.30103	0.30103	0.477121	1.78915	1.04356	-3.30103	0.915611	0.30103	-0.69897	0.30103	-0.69897	-4.69897	-2.69897	0.30103	-1.69897	-2.69897	-2.69897	0.30103	-1.69897	-4.69897	-1.69897	0.30103	0.30103	-1.69897	0.30103	0	-0.69897	2.09704	0.845222	1.04139	0.0211893	-2.30103	-4	-5	-3	-2	-2.30103	-2.69897	-7.30103	-0.09691	-6	10.9583	12.338	0.284098	0.172238	1.06116	0.0277599
1.30103	0.30103	0.477121	1.78915	1.04356	-3.30103	0.916559	0.30103	-0.69897	0.30103	-0.69897	-4.69897	-1.69897	0.30103	-1.69897	-2.69897	-2.69897	0.30103	-1.69897	-4.69897	-1.69897	0.30103	0.30103	-1.69897	0.30103	0	-0.69897	2.09704	0.845222	1.04139	0.0211893	-2.30103	-4	-5	-3	-2	-2.30103	-2.69897	-7.30103	-0.09691	-6	18.7083	10.258	0.443916	0.174157	1.06336	0.0250186
1.30103	0.30103	0.477121	1.78915	1.04356	-3.30103	0.925931	0.30103	-0.69897	0.30103	-0.69897	-4.69897	-0.69897	0.30103	-1.69897	-2.69897	-2.69897	0.30103	-1.69897	-4.69897	-1.69897	0.30103	0.30103	-1.69897	0.30103	0	-0.69897	2.09704	0.845222	1.04139	0.0211893	-2.30103	-4	-5	-3	-2	-2.30103	-2.69897	-7.30103	-0.09691	-6	20.0417	8.70933	0.529364	0.0605174	1.07937	0.0182113
1.30103	0.30103	0.477121	1.78915	1.04356	-3.30103	1.0875	0.30103	-0.69897	0.30103	-0.69897	-4.69897	0.60206	0.30103	-1.69897	-2.69897	-2.69897	0.30103	-1.69897	-4.69897	-1.69897	0.30103	0.30103	-1.69897	0.30103	0	-0.69897	2.09704	0.845222	1.04139	0.0211893	-2.30103	-4	-5	-3	-2	-2.30103	-2.69897	-7.30103	-0.09691	-6	18.3333	0.62361	0.663111	0.0170926	1.32613	0.0174284
1.30103	0.30103	0.477121	1.78915	1.04356	-3.30103	1.00996	0.30103	-0.69897	0.30103	-0.69897	-4.69897	0.30103	-4.69897	-1.69897	-2.69897	-2.69897	0.30103	-1.69897	-4.69897	-1.69897	0.30103	0.30103	-1.69897	0.30103	0	-0.69897	2.09704	0.845222	1.04139	0.0211893	-2.30103	-4	-5	-3	-2	-2.30103	-2.69897	-7.30103	-0.09691	-6	24	0.57735	0.616014	0.0141864	1.24649	0.00980158
1.30103	0.30103	0.477121	1.78915	1.04356	-3.30103	1.00996	0.30103	-0.69897	0.30103	-0.69897	-4.69897	0.30103	-2.69897	-1.69897	-2.69897	-2.69897	0.30103	-1.69897	-4.69897	-1.69897	0.30103	0.30103	-1.69897	0.30103	0	-0.69897	2.09704	0.845222	1.04139	0.0211893	-2.30103	-4	-5	-3	-2	-2.30103	-2.69897	-7.30103	-0.09691	-6	24.1667	0.372678	0.524308	0.0559005	1.22838	0.014106
1.30103	0.30103	0.477121	1.78915	1.04356	-3.30103	1.00996	0.30103	-0.69897	0.30103	-0.69897	-4.69897	0.30103	-1.69897	-1.69897	-2.69897	-2.69897	0.30103	-1.69897	-4.69897	-1.69897	0.30103	0.30103	-1.69897	0.30103	0	-0.69897	2.09704	0.845222	1.04139	0.0211893	-2.30103	-4	-5	-3	-2	-2.30103	-2.69897	-7.30103	-0.09691	-6	24.0909	0.701239	0.375568	0.0425251	0.0687667	0
1.30103	0.30103	0.477121	1.78915	1.04356	-3.30103	1.00996	0.30103	-0.69897	0.30103	-0.69897	-4.69897	0.30103	-0.69897	-1.69897	-2.69897	-2.69897	0.30103	-1.69897	-4.69897	-1.69897	0.30103	0.30103	-1.69897	0.30103	0	-0.69897	2.09704	0.845222	1.04139	0.0211893	-2.30103	-4	-5	-3	-2	-2.30103	-2.69897	-7.30103	-0.09691	-6	23	0.645497	0.613889	0.0121514	1.26235	0.0107558
1.30103	0.30103	0.477121	1.78915	1.04356	-3.30103	1.00996	0.30103	-0.69897	0.30103	-0.69897	-4.69897	0.30103	0.60206	-1.69897	-2.69897	-2.69897	0.30103	-1.69897	-4.69897	-1.69897	0.30103	0.30103	-1.69897	0.30103	0	-0.69897	2.09704	0.845222	1.04139	0.0211893	-2.30103	-4	-5	-3	-2	-2.30103	-2.69897	-7.30103	-0.09691	-6	20.7917	0.518746	0.682346	0.0178581	1.35935	0.0111073
1.30103	0.30103	0.477121	1.78915	1.04356	-3.30103	1.00996	0.30103	-0.69897	0.30103	-0.69897	-4.69897	0.30103	0.30103	-4.69897	-2.69897	-2.69897	0.30103	-1.69897	-4.69897	-1.69897	0.30103	0.30103	-1.69897	0.30103	0	-0.69897	2.09704	0.845222	1.04139	0.0211893	-2.30103	-4	-5	-3	-2	-2.30103	-2.69897	-7.30103	-0.09691	-6	21.9545	0.864832	0.648602	0.0243775	1.28082	0.0125106
1.30103	0.30103	0.477121	1.78915	1.04356	-3.30103	1.00996	0.30103	-0.69897	0.30103	-0.69897	-4.69897	0.30103	0.30103	-2.69897	-2.69897	-2.69897	0.30103	-1.69897	-4.69897	-1.69897	0.30103	0.30103	-1.69897	0.30103	0	-0.69897	2.09704	0.845222	1.04139	0.0211893	-2.30103	-4	-5	-3	-2	-2.30103	-2.69897	-7.30103	-0.09691	-6	21.375	0.844714	0.414747	0.0212231	1.20903	0.00940307
1.30103	0.30103	0.477121	1.78915	1.04356	-3.30103	1.00996	0.30103	-0.69897	0.30103	-0.69897	-4.69897	0.30103	0.30103	-1	-2.69897	-2.69897	0.30103	-1.69897	-4.69897	-1.69897	0.30103	0.30103	-1.69897	0.30103	0	-0.69897	2.09704	0.845222	1.04139	0.0211893	-2.30103	-4	-5	-3	-2	-2.30103	-2.69897	-7.30103	-0.09691	-6	21.625	0.581843	0.59434	0.013002	1.26485	0.00882665
1.30103	0.30103	0.477121	1.78915	1.04356	-3.30103	1.00996	0.30103	-0.69897	0.30103	-0.69897	-4.69897	0.30103	0.30103	-0.69897	-2.69897	-2.69897	0.30103	-1.69897	-4.69897	-1.69897	0.30103	0.30103	-1.69897	0.30103	0	-0.69897	2.09704	0.845222	1.04139	0.0211893	-2.30103	-4	-5	-3	-2	-2.30103	-2.69897	-7.30103	-0.09691	-6	20.5	0.408248	0.677591	0.0150322	1.28829	0.0184242
1.30103	0.30103	0.477121	1.78915	1.04356	-3.30103	1.00996	0.30103	-0.69897	0.30103	-0.69897	-4.69897	0.30103	0.30103	0.30103	-2.69897	-2.69897	0.30103	-1.69897	-4.69897	-1.69897	0.30103	0.30103	-1.69897	0.30103	0	-0.69897	2.09704	0.845222	1.04139	0.0211893	-2.30103	-4	-5	-3	-2	-2.30103	-2.69897	-7.30103	-0.09691	-6	19.125	0.462106	0.743264	0.0137167	1.22524	0.0307347
1.30103	0.30103	0.477121	1.78915	1.04356	-3.30103	1.0103	0.30103	-0.69897	0.30103	-0.69897	-4.69897	0.30103	0.30103	-1.69897	-2	-2.69897	0.30103	-1.69897	-4.69897	-1.69897	0.30103	0.30103	-1.69897	0.30103	0	-0.69897	2.09704	0.845222	1.04139	0.0211893	-2.30103	-4	-5	-3	-2	-2.30103	-2.69897	-7.30103	-0.09691	-6
1.30103	0.30103	0.477121	1.78915	1.04356	-3.30103	1.00988	0.30103	-0.69897	0.30103	-0.69897	-4.69897	0.30103	0.30103	-1.69897	-4.69897	-2.69897	0.30103	-1.69897	-4.69897	-1.69897	0.30103	0.30103	-1.69897	0.30103	0	-0.69897	2.09704	0.845222	1.04139	0.0211893	-2.30103	-4	-5	-3	-2	-2.30103	-2.69897	-7.30103	-0.09691	-6	20.0833	0.399653	0.519147	0.0234733	1.24304	0.00763408
1.30103	0.30103	0.477121	1.78915	1.04356	-3.30103	1.01072	0.30103	-0.69897	0.30103	-0.69897	-4.69897	0.30103	0.30103	-1.69897	-1.69897	-2.69897	0.30103	-1.69897	-4.69897	-1.69897	0.30103	0.30103	-1.69897	0.30103	0	-0.69897	2.09704	0.845222	1.04139	0.0211893	-2.30103	-4	-5	-3	-2	-2.30103	-2.69897	-7.30103	-0.09691	-6	19.75	0.381881	0.508038	0.0391739	1.22863	0.00887303
1.30103	0.30103	0.477121	1.78915	1.04356	-3.30103	1.08743	0.30103	-0.69897	0.30103	-0.69897	-4.69897	0.30103	0.30103	-1.69897	0.30103	-2.69897	0.30103	-1.69897	-4.69897	-1.69897	0.30103	0.30103	-1.69897	0.30103	0	-0.69897	2.09704	0.845222	1.04139	0.0211893	-2.30103	-4	-5	-3	-2	-2.30103	-2.69897	-7.30103	-0.09691	-6	19.5833	0.399653	0.684433	0.0141983	1.30607	0.00554186
1.30103	0.30103	0.477121	1.78915	1.04356	-3.30103	1.01828	0.30103	-0.69897	0.30103	-0.69897	-4.69897	0.30103	0.30103	-1.69897	-0.69897	-2.69897	0.30103	-1.69897	-4.69897	-1.69897	0.30103	0.30103	-1.69897	0.30103	0	-0.69897	2.09704	0.845222	1.04139	0.0211893	-2.30103	-4	-5	-3	-2	-2.30103	-2.69897	-7.30103	-0.09691	-6
1.30103	0.30103	0.477121	1.78915	1.04356	-3.30103	1.00996	0.30103	-0.69897	0.30103	-0.69897	-4.69897	0.30103	0.30103	-1.69897	-2.69897	-4.69897	0.30103	-1.69897	-4.69897	-1.69897	0.30103	0.30103	-1.69897	0.30103	0	-0.69897	2.09704	0.845222	1.04139	0.0211893	-2.30103	-4	-5	-3	-2	-2.30103	-2.69897	-7.30103	-0.09691	-6	22.5	0.301511	0.481163	0.0250463	1.22021	0.00625191
1.30103	0.30103	0.477121	1.78915	1.04356	-3.30103	1.00996	0.30103	-0.69897	0.30103	-0.69897	-4.69897	0.30103	0.30103	-1.69897	-2.69897	-2	0.30103	-1.69897	-4.69897	-1.69897	0.30103	0.30103	-1.69897	0.30103	0	-0.69897	2.09704	0.845222	1.04139	0.0211893	-2.30103	-4	-5	-3	-2	-2.30103	-2.69897	-7.30103	-0.09691	-6	16.25	0.381881	0.581521	0.0156005	1.2726	0.0104425
1.30103	0.30103	0.477121	1.78915	1.04356	-3.30103	1.00996	0.30103	-0.69897	0.30103	-0.69897	-4.69897	0.30103	0.30103	-1.69897	-2.69897	-1.69897	0.30103	-1.69897	-4.69897	-1.69897	0.30103	0.30103	-1.69897	0.30103	0	-0.69897	2.09704	0.845222	1.04139	0.0211893	-2.30103	-4	-5	-3	-2	-2.30103	-2.69897	-7.30103	-0.09691	-6	12.9583	0.320048	0.689891	0.00610038	1.29538	0.0170527
1.30103	0.30103	0.477121	1.78915	1.04356	-3.30103	1.00996	0.30103	-0.69897	0.30103	-0.69897	-4.69897	0.30103	0.30103	-1.69897	-2.69897	-0.69897	0.30103	-1.69897	-4.69897	-1.69897	0.30103	0.30103	-1.69897	0.30103	0	-0.69897	2.09704	0.845222	1.04139	0.0211893	-2.30103	-4	-5	-3	-2	-2.30103	-2.69897	-7.30103	-0.09691	-6	5.95833	0.320048	1.16944	0.0417718	1.26929	0.0163228
1.30103	0.30103	0.477121	1.78915	1.04356	-3.30103	1.00996	0.30103	-0.69897	0.30103	-0.69897	-4.69897	0.30103	0.30103	-1.69897	-2.69897	0.30103	0.30103	-1.69897	-4.69897	-1.69897	0.30103	0.30103	-1.69897	0.30103	0	-0.69897	2.09704	0.845222	1.04139	0.0211893	-2.30103	-4	-5	-3	-2	-2.30103	-2.69897	-7.30103	-0.09691	-6	6.20833	0.246503	1.12328	0.0490262	1.31152	0.0141035
1.30103	0.30103	0.477121	1.78915	1.04356	-3.30103	1.00996	0.30103	-0.69897	0.30103	-0.69897	-4.69897	0.30103	0.30103	-1.69897	-2.69897	-2.69897	-4.69897	-1.69897	-4.69897	-1.69897	0.30103	0.30103	-1.69897	0.30103	0	-0.69897	2.09704	0.845222	1.04139	0.0211893	-2.30103	-4	-5	-3	-2	-2.30103	-2.69897	-7.30103	-0.09691	-6	12.5833	0.953794	0.626062	0.268833	0.02085	0.000968246
1.30103	0.30103	0.477121	1.78915	1.04356	-3.30103	1.00996	0.30103	-0.69897	0.30103	-0.69897	-4.69897	0.30103	0.30103	-1.69897	-2.69897	-2.69897	-2.69897	-1.69897	-4.69897	-1.69897	0.30103	0.30103	-1.69897	0.30103	0	-0.69897	2.09704	0.845222	1.04139	0.0211893	-2.30103	-4	-5	-3	-2	-2.30103	-2.69897	-7.30103	-0.09691	-6	12.6818	0.746894	0.522269	0.0916335	0.0212667	0.00148137
1.30103	0.30103	0.477121	1.78915	1.04356	-3.30103	1.00996	0.30103	-0.69897	0.30103	-0.69897	-4.69897	0.30103	0.30103	-1.69897	-2.69897	-2.69897	-1.69897	-1.69897	-4.69897	-1.69897	0.30103	0.30103	-1.69897	0.30103	0	-0.69897	2.09704	0.845222	1.04139	0.0211893	-2.30103	-4	-5	-3	-2	-2.30103	-2.69897	-7.30103	-0.09691	-6	15.3889	0.392837	0.433026	0.072532	0.0185	0.0010198
1.30103	0.30103	0.477121	1.78915	1.04356	-3.30103	1.00996	0.30103	-0.69897	0.30103	-0.69897	-4.69897	0.30103	0.30103	-1.69897	-2.69897	-2.69897	-0.69897	-1.69897	-4.69897	-1.69897	0.30103	0.30103	-1.69897	0.30103	0	-0.69897	2.09704	0.845222	1.04139	0.0211893	-2.30103	-4	-5	-3	-2	-2.30103	-2.69897	-7.30103	-0.09691	-6					0.014137	0.000428735
1.30103	0.30103	0.477121	1.78915	1.04356	-3.30103	1.00996	0.30103	-0.69897	0.30103	-0.69897	-4.69897	0.30103	0.30103	-1.69897	-2.69897	-2.69897	0.60206	-1.69897	-4.69897	-1.69897	0.30103	0.30103	-1.69897	0.30103	0	-0.69897	2.09704	0.845222	1.04139	0.0211893	-2.30103	-4	-5	-3	-2	-2.30103	-2.69897	-7.30103	-0.09691	-6	17.5455	0.334021	0.651188	0.0137798	1.20543	0.0227018
1.30103	0.30103	0.477121	1.78915	1.04356	-3.30103	1.00911	0.30103	-0.69897	0.30103	-0.69897	-4.69897	0.30103	0.30103	-1.69897	-2.69897	-2.69897	0.30103	-4.69897	-4.69897	-1.69897	0.30103	0.30103	-1.69897	0.30103	0	-0.69897	2.09704	0.845222	1.04139	0.0211893	-2.30103	-4	-5	-3	-2	-2.30103	-2.69897	-7.30103	-0.09691	-6	21.625	0.462106	0.578776	0.0222448	1.25504	0.0205723
1.30103	0.30103	0.477121	1.78915	1.04356	-3.30103	1.0092	0.30103	-0.69897	0.30103	-0.69897	-4.69897	0.30103	0.30103	-1.69897	-2.69897	-2.69897	0.30103	-2.69897	-4.69897	-1.69897	0.30103	0.30103	-1.69897	0.30103	0	-0.69897	2.09704	0.845222	1.04139	0.0211893	-2.30103	-4	-5	-3	-2	-2.30103	-2.69897	-7.30103	-0.09691	-6	21.4583	1.62607	0.561696	0.0534171	1.25399	0.0109251
1.30103	0.30103	0.477121	1.78915	1.04356	-3.30103	1.01334	0.30103	-0.69897	0.30103	-0.69897	-4.69897	0.30103	0.30103	-1.69897	-2.69897	-2.69897	0.30103	-1	-4.69897	-1.69897	0.30103	0.30103	-1.69897	0.30103	0	-0.69897	2.09704	0.845222	1.04139	0.0211893	-2.30103	-4	-5	-3	-2	-2.30103	-2.69897	-7.30103	-0.09691	-6	21.6667	0.687184	0.584704	0.0131549	1.25273	0.00841315
1.30103	0.30103	0.477121	1.78915	1.04356	-3.30103	1.01753	0.30103	-0.69897	0.30103	-0.69897	-4.69897	0.30103	0.30103	-1.69897	-2.69897	-2.69897	0.30103	-0.69897	-4.69897	-1.69897	0.30103	0.30103	-1.69897	0.30103	0	-0.69897	2.09704	0.845222	1.04139	0.0211893	-2.30103	-4	-5	-3	-2	-2.30103	-2.69897	-7.30103	-0.09691	-6	21.5455	0.334021	0.509744	0.0159191	1.25849	0.0117417
1.30103	0.30103	0.477121	1.78915	1.04356	-3.30103	1.08679	0.30103	-0.69897	0.30103	-0.69897	-4.69897	0.30103	0.30103	-1.69897	-2.69897	-2.69897	0.30103	0.30103	-4.69897	-1.69897	0.30103	0.30103	-1.69897	0.30103	0	-0.69897	2.09704	0.845222	1.04139	0.0211893	-2.30103	-4	-5	-3	-2	-2.30103	-2.69897	-7.30103	-0.09691	-6	21.5833	0.493007	0.619897	0.0406973	1.30335	0.0276473
1.30103	0.30103	0.477121	1.78915	1.04356	-3.30103	1.00996	0.30103	-0.69897	0.30103	-0.69897	-4.69897	0.30103	0.30103	-1.69897	-2.69897	-2.69897	0.30103	-1.69897	-3	-1.69897	0.30103	0.30103	-1.69897	0.30103	0	-0.69897	2.09704	0.845222	1.04139	0.0211893	-2.30103	-4	-5	-3	-2	-2.30103	-2.69897	-7.30103	-0.09691	-6	22.625	0.544862	0.552576	0.0197785	1.24917	0.00812693
1.30103	0.30103	0.477121	1.78915	1.04356	-3.30103	1.00996	0.30103	-0.69897	0.30103	-0.69897	-4.69897	0.30103	0.30103	-1.69897	-2.69897	-2.69897	0.30103	-1.69897	-2.69897	-1.69897	0.30103	0.30103	-1.69897	0.30103	0	-0.69897	2.09704	0.845222	1.04139	0.0211893	-2.30103	-4	-5	-3	-2	-2.30103	-2.69897	-7.30103	-0.09691	-6	22.25	0.433013	0.585552	0.036256	1.25232	0.013149
1.30103	0.30103	0.477121	1.78915	1.04356	-3.30103	1.00996	0.30103	-0.69897	0.30103	-0.69897	-4.69897	0.30103	0.30103	-1.69897	-2.69897	-2.69897	0.30103	-1.69897	-1.69897	-1.69897	0.30103	0.30103	-1.69897	0.30103	0	-0.69897	2.09704	0.845222	1.04139	0.0211893	-2.30103	-4	-5	-3	-2	-2.30103	-2.69897	-7.30103	-0.09691	-6	22.5	0.408248	0.511747	0.0203791	1.2631	0.0117749
1.30103	0.30103	0.477121	1.78915	1.04356	-3.30103	1.00996	0.30103	-0.69897	0.30103	-0.69897	-4.69897	0.30103	0.30103	-1.69897	-2.69897	-2.69897	0.30103	-1.69897	-0.69897	-1.69897	0.30103	0.30103	-1.69897	0.30103	0	-0.69897	2.09704	0.845222	1.04139	0.0211893	-2.30103	-4	-5	-3	-2	-2.30103	-2.69897	-7.30103	-0.09691	-6	22.5417	0.593659	0.62678	0.0437157	1.25643	0.0222665
1.30103	0.30103	0.477121	1.78915	1.04356	-3.30103	1.00996	0.30103	-0.69897	0.30103	-0.69897	-4.69897	0.30103	0.30103	-1.69897	-2.69897	-2.69897	0.30103	-1.69897	0.30103	-1.69897	0.30103	0.30103	-1.69897	0.30103	0	-0.69897	2.09704	0.845222	1.04139	0.0211893	-2.30103	-4	-5	-3	-2	-2.30103	-2.69897	-7.30103	-0.09691	-6	22.5	0.763763	0.626973	0.0570088	1.27099	0.0220229
1.30103	0.30103	0.477121	1.78915	1.04356	-3.30103	1.00996	0.30103	-0.69897	0.30103	-0.69897	-4.69897	0.30103	0.30103	-1.69897	-2.69897	-2.69897	0.30103	-1.69897	-4.69897	-4.69897	0.30103	0.30103	-1.69897	0.30103	0	-0.69897	2.09704	0.845222	1.04139	0.0211893	-2.30103	-4	-5	-3	-2	-2.30103	-2.69897	-7.30103	-0.09691	-6	22.2727	0.578542	0.550962	0.0390267	1.25935	0.0101927
1.30103	0.30103	0.477121	1.78915	1.04356	-3.30103	1.00996	0.30103	-0.69897	0.30103	-0.69897	-4.69897	0.30103	0.30103	-1.69897	-2.69897	-2.69897	0.30103	-1.69897	-4.69897	-2.69897	0.30103	0.30103	-1.69897	0.30103	0	-0.69897	2.09704	0.845222	1.04139	0.0211893	-2.30103	-4	-5	-3	-2	-2.30103	-2.69897	-7.30103	-0.09691	-6	21.0833	0.343592	0.587608	0.0259864	1.26499	0.0121017
1.30103	0.30103	0.477121	1.78915	1.04356	-3.30103	1.00996	0.30103	-0.69897	0.30103	-0.69897	-4.69897	0.30103	0.30103	-1.69897	-2.69897	-2.69897	0.30103	-1.69897	-4.69897	-1	0.30103	0.30103	-1.69897	0.30103	0	-0.69897	2.09704	0.845222	1.04139	0.0211893	-2.30103	-4	-5	-3	-2	-2.30103	-2.69897	-7.30103	-0.09691	-6	21.875	0.544862	0.478953	0.0180681	1.24691	0.00665757
1.30103	0.30103	0.477121	1.78915	1.04356	-3.30103	1.00996	0.30103	-0.69897	0.30103	-0.69897	-4.69897	0.30103	0.30103	-1.69897	-2.69897	-2.69897	0.30103	-1.69897	-4.69897	-0.69897	0.30103	0.30103	-1.69897	0.30103	0	-0.69897	2.09704	0.845222	1.04139	0.0211893	-2.30103	-4	-5	-3	-2	-2.30103	-2.69897	-7.30103	-0.09691	-6	22.25	0.381881	0.52052	0.013917	1.26913	0.0171753
1.30103	0.30103	0.477121	1.78915	1.04356	-3.30103	1.00996	0.30103	-0.69897	0.30103	-0.69897	-4.69897	0.30103	0.30103	-1.69897	-2.69897	-2.69897	0.30103	-1.69897	-4.69897	0.30103	0.30103	0.30103	-1.69897	0.30103	0	-0.69897	2.09704	0.845222	1.04139	0.0211893	-2.30103	-4	-5	-3	-2	-2.30103	-2.69897	-7.30103	-0.09691	-6	23.1667	0.471405	0.643149	0.0147696	1.31823	0.00887341
1.30103	0.30103	0.477121	1.78915	1.04356	-3.30103	1.00996	0.30103	-0.69897	0.30103	-0.69897	-4.69897	0.30103	0.30103	-1.69897	-2.69897	-2.69897	0.30103	-1.69897	-4.69897	-1.69897	-4.69897	0.30103	-1.69897	0.30103	0	-0.69897	2.09704	0.845222	1.04139	0.0211893	-2.30103	-4	-5	-3	-2	-2.30103	-2.69897	-7.30103	-0.09691	-6	21.3333	0.372678	0.525388	0.0299001	1.20402	0.0178466
1.30103	0.30103	0.477121	1.78915	1.04356	-3.30103	1.00996	0.30103	-0.69897	0.30103	-0.69897	-4.69897	0.30103	0.30103	-1.69897	-2.69897	-2.69897	0.30103	-1.69897	-4.69897	-1.69897	-2.69897	0.30103	-1.69897	0.30103	0	-0.69897	2.09704	0.845222	1.04139	0.0211893	-2.30103	-4	-5	-3	-2	-2.30103	-2.69897	-7.30103	-0.09691	-6	21.0417	0.476897	0.628363	0.0272245	1.26618	0.0072879
1.30103	0.30103	0.477121	1.78915	1.04356	-3.30103	1.00996	0.30103	-0.69897	0.30103	-0.69897	-4.69897	0.30103	0.30103	-1.69897	-2.69897	-2.69897	0.30103	-1.69897	-4.69897	-1.69897	-1.69897	0.30103	-1.69897	0.30103	0	-0.69897	2.09704	0.845222	1.04139	0.0211893	-2.30103	-4	-5	-3	-2	-2.30103	-2.69897	-7.30103	-0.09691	-6	21.375	0.462106	0.643179	0.0169179	1.25052	0.0151738
1.30103	0.30103	0.477121	1.78915	1.04356	-3.30103	1.00996	0.30103	-0.69897	0.30103	-0.69897	-4.69897	0.30103	0.30103	-1.69897	-2.69897	-2.69897	0.30103	-1.69897	-4.69897	-1.69897	-0.69897	0.30103	-1.69897	0.30103	0	-0.69897	2.09704	0.845222	1.04139	0.0211893	-2.30103	-4	-5	-3	-2	-2.30103	-2.69897	-7.30103	-0.09691	-6	21.1667	0.424918	0.598451	0.020514	1.24438	0.0205624
1.30103	0.30103	0.477121	1.78915	1.04356	-3.30103	1.00996	0.30103	-0.69897	0.30103	-0.69897	-4.69897	0.30103	0.30103	-1.69897	-2.69897	-2.69897	0.30103	-1.69897	-4.69897	-1.69897	0.60206	0.30103	-1.69897	0.30103	0	-0.69897	2.09704	0.845222	1.04139	0.0211893	-2.30103	-4	-5	-3	-2	-2.30103	-2.69897	-7.30103	-0.09691	-6	20.5417	0.431003	0.700244	0.0101748	1.39452	0.0165217
1.30103	0.30103	0.477121	1.78915	1.04356	-3.30103	1.00996	0.30103	-0.69897	0.30103	-0.69897	-4.69897	0.30103	0.30103	-1.69897	-2.69897	-2.69897	0.30103	-1.69897	-4.69897	-1.69897	0.30103	-4.69897	-1.69897	0.30103	0	-0.69897	2.09704	0.845222	1.04139	0.0211893	-2.30103	-4	-5	-3	-2	-2.30103	-2.69897	-7.30103	-0.09691	-6	6.625	0.216506	0.796695	0.0224544	1.30041	0.0059899
1.30103	0.30103	0.477121	1.78915	1.04356	-3.30103	1.00996	0.30103	-0.69897	0.30103	-0.69897	-4.69897	0.30103	0.30103	-1.69897	-2.69897	-2.69897	0.30103	-1.69897	-4.69897	-1.69897	0.30103	-2.69897	-1.69897	0.30103	0	-0.69897	2.09704	0.845222	1.04139	0.0211893	-2.30103	-4	-5	-3	-2	-2.30103	-2.69897	-7.30103	-0.09691	-6	6.66667	0.311805	0.798616	0.03752	1.29735	0.00671665
1.30103	0.30103	0.477121	1.78915	1.04356	-3.30103	1.00996	0.30103	-0.69897	0.30103	-0.69897	-4.69897	0.30103	0.30103	-1.69897	-2.69897	-2.69897	0.30103	-1.69897	-4.69897	-1.69897	0.30103	-1.69897	-1.69897	0.30103	0	-0.69897	2.09704	0.845222	1.04139	0.0211893	-2.30103	-4	-5	-3	-2	-2.30103	-2.69897	-7.30103	-0.09691	-6	8.875	0.360844	0.807282	0.0266541	1.28724	0.00685492
1.30103	0.30103	0.477121	1.78915	1.04356	-3.30103	1.00996	0.30103	-0.69897	0.30103	-0.69897	-4.69897	0.30103	0.30103	-1.69897	-2.69897	-2.69897	0.30103	-1.69897	-4.69897	-1.69897	0.30103	-0.69897	-1.69897	0.30103	0	-0.69897	2.09704	0.845222	1.04139	0.0211893	-2.30103	-4	-5	-3	-2	-2.30103	-2.69897	-7.30103	-0.09691	-6	16.8333	0.311805	0.81478	0.0250247	1.29713	0.0109515
1.30103	0.30103	0.477121	1.78915	1.04356	-3.30103	1.00996	0.30103	-0.69897	0.30103	-0.69897	-4.69897	0.30103	0.30103	-1.69897	-2.69897	-2.69897	0.30103	-1.69897	-4.69897	-1.69897	0.30103	0.60206	-1.69897	0.30103	0	-0.69897	2.09704	0.845222	1.04139	0.0211893	-2.30103	-4	-5	-3	-2	-2.30103	-2.69897	-7.30103	-0.09691	-6	23.9167	0.606676	0.538137	0.0137108	1.33035	0.016364
1.30103	0.30103	0.477121	1.78915	1.04356	-3.30103	1.00996	0.30103	-0.69897	0.30103	-1.69897	-4.69897	0.30103	0.30103	-1.69897	-2.69897	-2.69897	0.30103	-1.69897	-4.69897	-1.69897	0.30103	0.30103	-4.69897	0.30103	0	-0.69897	2.09704	0.845222	1.04139	0.0211893	-2.30103	-4	-5	-3	-2	-2.30103	-2.69897	-7.30103	-0.09691	-6	20.75	0.433013	0.591066	0.0503584	1.22289	0.00892708
1.30103	0.30103	0.477121	1.78915	1.04356	-3.30103	1.00996	0.30103	-0.69897	0.30103	-0.69897	-4.69897	0.30103	0.30103	-1.69897	-2.69897	-2.69897	0.30103	-1.69897	-4.69897	-1.69897	0.30103	0.30103	-2.69897	0.30103	0	-0.69897	2.09704	0.845222	1.04139	0.0211893	-2.30103	-4	-5	-3	-2	-2.30103	-2.69897	-7.30103	-0.09691	-6	19.875	0.544862	0.605457	0.0278784	1.24268	0.0167984
1.30103	0.30103	0.477121	1.78915	1.04356	-3.30103	1.00996	0.30103	-0.69897	0.30103	-0.69897	-4.69897	0.30103	0.30103	-1.69897	-2.69897	-2.69897	0.30103	-1.69897	-4.69897	-1.69897	0.30103	0.30103	-1.69897	0.30103	0	-0.69897	2.09704	0.845222	1.04139	0.0211893	-2.30103	-4	-5	-3	-2	-2.30103	-2.69897	-7.30103	-0.09691	-6	17.125	0.695971	0.738399	0.0259477	1.29214	0.0104781
1.30103	0.30103	0.477121	1.78915	1.04356	-3.30103	1.00996	0.30103	-0.69897	0.30103	-0.69897	-4.69897	0.30103	0.30103	-1.69897	-2.69897	-2.69897	0.30103	-1.69897	-4.69897	-1.69897	0.30103	0.30103	0.30103	0.30103	0	-0.69897	2.09704	0.845222	1.04139	0.0211893	-2.30103	-4	-5	-3	-2	-2.30103	-2.69897	-7.30103	-0.09691	-6	10.25	0.433013	0.929436	0.019245	1.07802	0.0211205
1.30103	0.30103	0.477121	1.78915	1.04356	-3.30103	1.00996	0.30103	-0.69897	0.30103	-0.69897	-4.69897	0.30103	0.30103	-1.69897	-2.69897	-2.69897	0.30103	-1.69897	-4.69897	-1.69897	0.30103	0.30103	-1.69897	-4.69897	0	-0.69897	2.09704	0.845222	1.04139	0.0211893	-2.30103	-4	-5	-3	-2	-2.30103	-2.69897	-7.30103	-0.09691	-6	20.375	0.414578	0.625383	0.0135086	1.25652	0.00678387
1.30103	0.30103	0.477121	1.78915	1.04356	-3.30103	1.00996	0.30103	-0.69897	0.30103	-0.69897	-4.69897	0.30103	0.30103	-1.69897	-2.69897	-2.69897	0.30103	-1.69897	-4.69897	-1.69897	0.30103	0.30103	-1.69897	-2.69897	0	-0.69897	2.09704	0.845222	1.04139	0.0211893	-2.30103	-4	-5	-3	-2	-2.30103	-2.69897	-7.30103	-0.09691	-6	20.125	0.484123	0.535337	0.0271679	1.21143	0.00790745
1.30103	0.30103	0.477121	1.78915	1.04356	-3.30103	1.00996	0.30103	-0.69897	0.30103	-0.69897	-4.69897	0.30103	0.30103	-1.69897	-2.69897	-2.69897	0.30103	-1.69897	-4.69897	-1.69897	0.30103	0.30103	-1.69897	-1.69897	0	-0.69897	2.09704	0.845222	1.04139	0.0211893	-2.30103	-4	-5	-3	-2	-2.30103	-2.69897	-7.30103	-0.09691	-6	20.4286	0.416497	0.607556	0.131147	1.22073	0.0116541
1.30103	0.30103	0.477121	1.78915	1.04356	-3.30103	1.00996	0.30103	-0.69897	0.30103	-0.69897	-4.69897	0.30103	0.30103	-1.69897	-2.69897	-2.69897	0.30103	-1.69897	-4.69897	-1.69897	0.30103	0.30103	-1.69897	0	0	-0.69897	2.09704	0.845222	1.04139	0.0211893	-2.30103	-4	-5	-3	-2	-2.30103	-2.69897	-7.30103	-0.09691	-6	20.2143	0.451754	0.467525	0.047091	1.20343	0.0375489
1.30103	0.30103	0.477121	1.78915	1.04356	-3.30103	1.00996	0.30103	-0.69897	0.30103	-0.69897	-4.69897	0.30103	0.30103	-1.69897	-2.69897	-2.69897	0.30103	-1.69897	-4.69897	-1.69897	0.30103	0.30103	-1.69897	0.30103	-5	-0.69897	2.09704	0.845222	1.04139	0.0211893	-2.30103	-4	-5	-3	-2	-2.30103	-2.69897	-7.30103	-0.09691	-6	26.2083	0.379601	0.591113	0.0302059
1.30103	0.30103	0.477121	1.78915	1.04356	-3.30103	1.00996	0.30103	-0.69897	0.30103	-0.69897	-4.69897	0.30103	0.30103	-1.69897	-2.69897	-2.69897	0.30103	-1.69897	-4.69897	-1.69897	0.30103	0.30103	-1.69897	0.30103	-3	-0.69897	2.09704	0.845222	1.04139	0.0211893	-2.30103	-4	-5	-3	-2	-2.30103	-2.69897	-7.30103	-0.09691	-6	23.6667	0.552771	0.563852	0.0463281	1.2093	0.0148213
1.30103	0.30103	0.477121	1.78915	1.04356	-3.30103	1.00996	0.30103	-0.69897	0.30103	-0.69897	-4.69897	0.30103	0.30103	-1.69897	-2.69897	-2.69897	0.30103	-1.69897	-4.69897	-1.69897	0.30103	0.30103	-1.69897	0.30103	-2	-0.69897	2.09704	0.845222	1.04139	0.0211893	-2.30103	-4	-5	-3	-2	-2.30103	-2.69897	-7.30103	-0.09691	-6	22.75	0.595119	0.534637	0.0099461	1.18424	0.0206409
1.30103	0.30103	0.477121	1.78915	1.04356	-3.30103	1.00996	0.30103	-0.69897	0.30103	-0.69897	-4.69897	0.30103	0.30103	-1.69897	-2.69897	-2.69897	0.30103	-1.69897	-4.69897	-1.69897	0.30103	0.30103	-1.69897	0.30103	-1	-0.69897	2.09704	0.845222	1.04139	0.0211893	-2.30103	-4	-5	-3	-2	-2.30103	-2.69897	-7.30103	-0.09691	-6	22.4167	0.399653	0.557191	0.0250606	1.21579	0.0214784
1.30103	0.30103	0.477121	1.78915	1.04356	-3.30103	1.00996	0.30103	-0.69897	0.30103	-0.69897	-4.69897	0.30103	0.30103	-1.69897	-2.69897	-2.69897	0.30103	-1.69897	-4.69897	-1.69897	0.30103	0.30103	-1.69897	0.30103	-0.30103	-0.69897	2.09704	0.845222	1.04139	0.0211893	-2.30103	-4	-5	-3	-2	-2.30103	-2.69897	-7.30103	-0.09691	-6	22.25	0.478714	0.544533	0.0203269	1.26666	0.0179518
1.30103	0.30103	0.477121	1.78915	1.04356	-3.30103	1.00996	0.30103	-0.69897	0.30103	-0.69897	-4.69897	0.30103	0.30103	-1.69897	-2.69897	-2.69897	0.30103	-1.69897	-4.69897	-1.69897	0.30103	0.30103	-1.69897	0.30103	0	-4.69897	2.09704	0.845222	1.04139	0.0211893	-2.30103	-4	-5	-3	-2	-2.30103	-2.69897	-7.30103	-0.09691	-6	15.25	0.381881	0.60372	0.0269351	1.27318	0.0111622
1.30103	0.30103	0.477121	1.78915	1.04356	-3.30103	1.00996	0.30103	-0.69897	0.30103	-0.69897	-4.69897	0.30103	0.30103	-1.69897	-2.69897	-2.69897	0.30103	-1.69897	-4.69897	-1.69897	0.30103	0.30103	-1.69897	0.30103	0	-2.69897	2.09704	0.845222	1.04139	0.0211893	-2.30103	-4	-5	-3	-2	-2.30103	-2.69897	-7.30103	-0.09691	-6	15.2083	0.431003	0.706285	0.0131866	1.29624	0.0150686
1.30103	0.30103	0.477121	1.78915	1.04356	-3.30103	1.00996	0.30103	-0.69897	0.30103	-0.69897	-4.69897	0.30103	0.30103	-1.69897	-2.69897	-2.69897	0.30103	-1.69897	-4.69897	-1.69897	0.30103	0.30103	-1.69897	0.30103	0	-1.69897	2.09704	0.845222	1.04139	0.0211893	-2.30103	-4	-5	-3	-2	-2.30103	-2.69897	-7.30103	-0.09691	-6	15.0833	0.276385	0.620858	0.0177645	1.29038	0.0203678
1.30103	0.30103	0.477121	1.78915	1.04356	-3.30103	1.00996	0.30103	-0.69897	0.30103	-0.69897	-4.69897	0.30103	0.30103	-1.69897	-2.69897	-2.69897	0.30103	-1.69897	-4.69897	-1.69897	0.30103	0.30103	-1.69897	0.30103	0	0	2.09704	0.845222	1.04139	0.0211893	-2.30103	-4	-5	-3	-2	-2.30103	-2.69897	-7.30103	-0.09691	-6	40	0	0.344475	0
1.30103	0.30103	0.477121	1.78915	1.04356	-3.30103	1.00996	0.30103	-0.69897	0.30103	-0.69897	-4.69897	0.30103	0.30103	-1.69897	-2.69897	-2.69897	0.30103	-1.69897	-4.69897	-1.69897	0.30103	0.30103	-1.69897	0.30103	0	0.30103	2.09704	0.845222	1.04139	0.0211893	-2.30103	-4	-5	-3	-2	-2.30103	-2.69897	-7.30103	-0.09691	-6	0	0	0	0	0	0
1.30103	0.30103	0.477121	1.78915	1.04356	-3.30103	0.915505	0.30103	-0.69897	0.30103	-0.69897	-4.69897	0.30103	0.30103	-1.69897	-2.69897	-2.69897	0.30103	-1.69897	-4.69897	-1.69897	0.30103	0.30103	-1.69897	0.30103	0	-0.69897	2.09004	0.845222	1.04139	0.0211893	-2.30103	-4	-5	-3	-2	-2.30103	-2.69897	-7.30103	-0.09691	-6	22.0833	0.493007	0.520337	0.0254088	1.25354	0.0105421
1.30103	0.30103	0.477121	1.78915	1.04356	-3.30103	0.916559	0.30103	-0.69897	0.30103	-0.69897	-4.69897	0.30103	0.30103	-1.69897	-2.69897	-2.69897	0.30103	-1.69897	-4.69897	-1.69897	0.30103	0.30103	-1.69897	0.30103	0	-0.69897	2.09011	0.845222	1.04139	0.0211893	-2.30103	-4	-5	-3	-2	-2.30103	-2.69897	-7.30103	-0.09691	-6	22.125	0.414578	0.533161	0.0277292	1.25543	0.0107738
1.30103	0.30103	0.477121	1.78915	1.04356	-3.30103	0.925931	0.30103	-0.69897	0.30103	-0.69897	-4.69897	0.30103	0.30103	-1.69897	-2.69897	-2.69897	0.30103	-1.69897	-4.69897	-1.69897	0.30103	0.30103	-1.69897	0.30103	0	-0.69897	2.09075	0.845222	1.04139	0.0211893	-2.30103	-4	-5	-3	-2	-2.30103	-2.69897	-7.30103	-0.09691	-6	21.875	0.29756	0.583698	0.0211418	1.25843	0.0151199
1.30103	0.30103	0.477121	1.78915	1.04356	-3.30103	1.26083	0.30103	-0.69897	0.30103	-0.69897	-4.69897	0.30103	0.30103	-1.69897	-2.69897	-2.69897	0.30103	-1.69897	-4.69897	-1.69897	0.30103	0.30103	-1.69897	0.30103	0	-0.69897	2.12398	0.845222	1.04139	0.0211893	-2.30103	-4	-5	-3	-2	-2.30103	-2.69897	-7.30103	-0.09691	-6	21.75	0.520416	0.527557	0.0181355	1.25016	0.0131535
1.30103	0.30103	0.477121	1.78915	1.04356	-3.30103	1.45074	0.30103	-0.69897	0.30103	-0.69897	-4.69897	0.30103	0.30103	-1.69897	-2.69897	-2.69897	0.30103	-1.69897	-4.69897	-1.69897	0.30103	0.30103	-1.69897	0.30103	0	-0.69897	2.15545	0.845222	1.04139	0.0211893	-2.30103	-4	-5	-3	-2	-2.30103	-2.69897	-7.30103	-0.09691	-6	21.4167	0.640095	0.55516	0.0296818	1.25792	0.00655877
1.30103	0.30103	0.477121	1.78915	1.04356	-3.30103	0.965296	0.30103	-0.69897	0.30103	-0.69897	-4.69897	0.30103	0.30103	-1.69897	-2.69897	-2.69897	0.30103	-1.69897	-4.69897	-1.69897	0.30103	0.30103	-1.69897	0.30103	0	-0.69897	2.09704	0.778296	1.04139	0.0211893	-2.30103	-4	-5	-3	-2	-2.30103	-2.69897	-7.30103	-0.09691	-6	21.875	0.73951	0.605852	0.0232481	1.25929	0.00703886
1.30103	0.30103	0.477121	1.78915	1.04356	-3.30103	0.965766	0.30103	-0.69897	0.30103	-0.69897	-4.69897	0.30103	0.30103	-1.69897	-2.69897	-2.69897	0.30103	-1.69897	-4.69897	-1.69897	0.30103	0.30103	-1.69897	0.30103	0	-0.69897	2.09704	0.779019	1.04139	0.0211893	-2.30103	-4	-5	-3	-2	-2.30103	-2.69897	-7.30103	-0.09691	-6	21.3333	0.424918	0.633281	0.0224171	1.27771	0.0129721
1.30103	0.30103	0.477121	1.78915	1.04356	-3.30103	0.969975	0.30103	-0.69897	0.30103	-0.69897	-4.69897	0.30103	0.30103	-1.69897	-2.69897	-2.69897	0.30103	-1.69897	-4.69897	-1.69897	0.30103	0.30103	-1.69897	0.30103	0	-0.69897	2.09704	0.785472	1.04139	0.0211893	-2.30103	-4	-5	-3	-2	-2.30103	-2.69897	-7.30103	-0.09691	-6	21.7083	0.518746	0.511715	0.0224027	1.2481	0.00974679
1.30103	0.30103	0.477121	1.78915	1.04356	-3.30103	1.15327	0.30103	-0.69897	0.30103	-0.69897	-4.69897	0.30103	0.30103	-1.69897	-2.69897	-2.69897	0.30103	-1.69897	-4.69897	-1.69897	0.30103	0.30103	-1.69897	0.30103	0	-0.69897	2.09704	1.04147	1.04139	0.0211893	-2.30103	-4	-5	-3	-2	-2.30103	-2.69897	-7.30103	-0.09691	-6	21.2083	0.431003	0.46758	0.0270312	1.25152	0.012212
1.30103	0.30103	0.477121	1.78915	1.04356	-3.30103	1.28402	0.30103	-0.69897	0.30103	-0.69897	-4.69897	0.30103	0.30103	-1.69897	-2.69897	-2.69897	0.30103	-1.69897	-4.69897	-1.69897	0.30103	0.30103	-1.69897	0.30103	0	-0.69897	2.09704	1.20417	1.04139	0.0211893	-2.30103	-4	-5	-3	-2	-2.30103	-2.69897	-7.30103	-0.09691	-6	20.6667	0.552771	0.588503	0.0187781	1.28274	0.0231242
1.30103	0.30103	0.477121	1.78915	0.0232977	-3.30103	1.00996	0.30103	-0.69897	0.30103	-0.69897	-4.69897	0.30103	0.30103	-1.69897	-2.69897	-2.69897	0.30103	-1.69897	-4.69897	-1.69897	0.30103	0.30103	-1.69897	0.30103	0	-0.69897	2.09704	0.845222	0	0.0211893	-2.30103	-4	-5	-3	-2	-2.30103	-2.69897	-7.30103	-0.09691	-6	21.0833	0.448764	0.680299	0.0105916	1.23277	0.00703957
1.30103	0.30103	0.477121	1.78915	0.0273945	-3.30103	1.00996	0.30103	-0.69897	0.30103	-0.69897	-4.69897	0.30103	0.30103	-1.69897	-2.69897	-2.69897	0.30103	-1.69897	-4.69897	-1.69897	0.30103	0.30103	-1.69897	0.30103	0	-0.69897	2.09704	0.845222	0.00432137	0.0211893	-2.30103	-4	-5	-3	-2	-2.30103	-2.69897	-7.30103	-0.09691	-6	20.9167	0.533594	0.686098	0.0111313	1.22624	0.0111059
1.30103	0.30103	0.477121	1.78915	0.0626233	-3.30103	1.00996	0.30103	-0.69897	0.30103	-0.69897	-4.69897	0.30103	0.30103	-1.69897	-2.69897	-2.69897	0.30103	-1.69897	-4.69897	-1.69897	0.30103	0.30103	-1.69897	0.30103	0	-0.69897	2.09704	0.845222	0.0413927	0.0211893	-2.30103	-4	-5	-3	-2	-2.30103	-2.69897	-7.30103	-0.09691	-6	20.6667	0.471405	0.681171	0.0124568	1.22657	0.0084475
1.30103	0.30103	0.477121	1.78915	0.312835	-3.30103	1.00996	0.30103	-0.69897	0.30103	-0.69897	-4.69897	0.30103	0.30103	-1.69897	-2.69897	-2.69897	0.30103	-1.69897	-4.69897	-1.69897	0.30103	0.30103	-1.69897	0.30103	0	-0.69897	2.09704	0.845222	0.30103	0.0211893	-2.30103	-4	-5	-3	-2	-2.30103	-2.69897	-7.30103	-0.09691	-6	20.4583	0.379601	0.694527	0.0181244	1.23821	0.00653528
1.30103	0.30103	0.477121	1.78915	1.70804	-3.30103	1.00996	0.30103	-0.69897	0.30103	-0.69897	-4.69897	0.30103	0.30103	-1.69897	-2.69897	-2.69897	0.30103	-1.69897	-4.69897	-1.69897	0.30103	0.30103	-1.69897	0.30103	0	-0.69897	2.09704	0.845222	1.70757	0.0211893	-2.30103	-4	-5	-3	-2	-2.30103	-2.69897	-7.30103	-0.09691	-6	17.2143	0.524891	0.103754	0.0348235	0.381944	0.0978062
1.30103	0.30103	0.477121	1.78915	1.04356	-3.30103	0.915505	0.30103	-0.69897	0.30103	-0.69897	-4.69897	0.30103	0.30103	-1.69897	-2.69897	-2.69897	0.30103	-1.69897	-4.69897	-1.69897	0.30103	0.30103	-1.69897	0.30103	0	-0.69897	2.09704	0.845222	1	0.0211893	-2.30103	-4	-5	-3	-2	-2.30103	-2.69897	-7.30103	-0.09691	-6	21.125	0.462106	0.653121	0.0114904	1.27949	0.0135516
1.30103	0.30103	0.477121	1.78915	1.04356	-3.30103	0.916559	0.30103	-0.69897	0.30103	-0.69897	-4.69897	0.30103	0.30103	-1.69897	-2.69897	-2.69897	0.30103	-1.69897	-4.69897	-1.69897	0.30103	0.30103	-1.69897	0.30103	0	-0.69897	2.09704	0.845222	1.00043	0.0211893	-2.30103	-4	-5	-3	-2	-2.30103	-2.69897	-7.30103	-0.09691	-6	20.7273	0.248965	0.679299	0.0104704	1.28366	0.0101474
1.30103	0.30103	0.477121	1.78915	1.04356	-3.30103	0.925931	0.30103	-0.69897	0.30103	-0.69897	-4.69897	0.30103	0.30103	-1.69897	-2.69897	-2.69897	0.30103	-1.69897	-4.69897	-1.69897	0.30103	0.30103	-1.69897	0.30103	0	-0.69897	2.09704	0.845222	1.00432	0.0211893	-2.30103	-4	-5	-3	-2	-2.30103	-2.69897	-7.30103	-0.09691	-6	20.8333	0.62361	0.645891	0.00904776	1.27774	0.0124814
1.30103	0.30103	0.477121	1.78915	1.04356	-3.30103	1.26083	0.30103	-0.69897	0.30103	-0.69897	-4.69897	0.30103	0.30103	-1.69897	-2.69897	-2.69897	0.30103	-1.69897	-4.69897	-1.69897	0.30103	0.30103	-1.69897	0.30103	0	-0.69897	2.09704	0.845222	1.17609	0.0211893	-2.30103	-4	-5	-3	-2	-2.30103	-2.69897	-7.30103	-0.09691	-6	29.2083	3.01011	0.231871	0.0649488	0.1331	0.00233333
1.30103	0.30103	0.477121	1.78915	1.04356	-3.30103	1.45074	0.30103	-0.69897	0.30103	-0.69897	-4.69897	0.30103	0.30103	-1.69897	-2.69897	-2.69897	0.30103	-1.69897	-4.69897	-1.69897	0.30103	0.30103	-1.69897	0.30103	0	-0.69897	2.09704	0.845222	1.30103	0.0211893	-2.30103	-4	-5	-3	-2	-2.30103	-2.69897	-7.30103	-0.09691	-6	24.9583	14.3939	0.290697	0.197445
1.30103	0.30103	0.477121	1.78915	1.04356	-3.30103	0.915505	0.30103	-0.69897	0.30103	-0.69897	-4.69897	0.30103	0.30103	-1.69897	-2.69897	-2.69897	0.30103	-1.69897	-4.69897	-1.69897	0.30103	0.30103	-1.69897	0.30103	0	-0.69897	2.09704	0.845222	1.04139	-1.30103	-2.30103	-4	-5	-3	-2	-2.30103	-2.69897	-7.30103	-0.09691	-6	21.375	0.544862	0.702555	0.0137689	1.23452	0.00427444
1.30103	0.30103	0.477121	1.78915	1.04356	-3.30103	0.915611	0.30103	-0.69897	0.30103	-0.69897	-4.69897	0.30103	0.30103	-1.69897	-2.69897	-2.69897	0.30103	-1.69897	-4.69897	-1.69897	0.30103	0.30103	-1.69897	0.30103	0	-0.69897	2.09704	0.845222	1.04139	-1.29243	-2.30103	-4	-5	-3	-2	-2.30103	-2.69897	-7.30103	-0.09691	-6	20.125	1.11102	0.679649	0.0216914	1.25385	0.0166731
1.30103	0.30103	0.477121	1.78915	1.04356	-3.30103	0.916559	0.30103	-0.69897	0.30103	-0.69897	-4.69897	0.30103	0.30103	-1.69897	-2.69897	-2.69897	0.30103	-1.69897	-4.69897	-1.69897	0.30103	0.30103	-1.69897	0.30103	0	-0.69897	2.09704	0.845222	1.04139	-1.22185	-2.30103	-4	-5	-3	-2	-2.30103	-2.69897	-7.30103	-0.09691	-6	12.875	10.8073	0.320103	0.194523	1.25143	0.0221023
1.30103	0.30103	0.477121	1.78915	1.04356	-3.30103	0.925931	0.30103	-0.69897	0.30103	-0.69897	-4.69897	0.30103	0.30103	-1.69897	-2.69897	-2.69897	0.30103	-1.69897	-4.69897	-1.69897	0.30103	0.30103	-1.69897	0.30103	0	-0.69897	2.09704	0.845222	1.04139	-0.823909	-2.30103	-4	-5	-3	-2	-2.30103	-2.69897	-7.30103	-0.09691	-6	20.75	0.433013	0.563226	0.0340188	1.25747	0.00947575
1.30103	0.30103	0.477121	1.78915	1.04159	-3.30103	1.00996	0.30103	-0.69897	0.30103	-0.69897	-4.69897	0.30103	0.30103	-1.69897	-2.69897	-2.69897	0.30103	-1.69897	-4.69897	-1.69897	0.30103	0.30103	-1.69897	0.30103	0	-0.69897	2.09704	0.845222	1.04139	0	-2.30103	-4	-5	-3	-2	-2.30103	-2.69897	-7.30103	-0.09691	-6	20.6875	0.658478	0.692645	0.0188578	1.24202	0.00674279
1.30103	0.30103	0.477121	1.78915	1.04161	-3.30103	1.00996	0.30103	-0.69897	0.30103	-0.69897	-4.69897	0.30103	0.30103	-1.69897	-2.69897	-2.69897	0.30103	-1.69897	-4.69897	-1.69897	0.30103	0.30103	-1.69897	0.30103	0	-0.69897	2.09704	0.845222	1.04139	0.000217093	-2.30103	-4	-5	-3	-2	-2.30103	-2.69897	-7.30103	-0.09691	-6	20.1875	0.966227	0.709293	0.00897949	1.24864	0.00674112
1.30103	0.30103	0.477121	1.78915	1.04179	-3.30103	1.00996	0.30103	-0.69897	0.30103	-0.69897	-4.69897	0.30103	0.30103	-1.69897	-2.69897	-2.69897	0.30103	-1.69897	-4.69897	-1.69897	0.30103	0.30103	-1.69897	0.30103	0	-0.69897	2.09704	0.845222	1.04139	0.00216606	-2.30103	-4	-5	-3	-2	-2.30103	-2.69897	-7.30103	-0.09691	-6	21.5625	0.634306	0.67476	0.0332516	1.24493	0.00994708
1.30103	0.30103	0.477121	1.78915	1.06089	-3.30103	1.00996	0.30103	-0.69897	0.30103	-0.69897	-4.69897	0.30103	0.30103	-1.69897	-2.69897	-2.69897	0.30103	-1.69897	-4.69897	-1.69897	0.30103	0.30103	-1.69897	0.30103	0	-0.69897	2.09704	0.845222	1.04139	0.176091	-2.30103	-4	-5	-3	-2	-2.30103	-2.69897	-7.30103	-0.09691	-6	24.7857	2.71052	0.490842	0.124598	1.26276	0.0114804
1.30103	-4.69897	0.477121	1.78915	1.04356	-3.30103	1.00996	0.30103	-0.69897	0.30103	-0.69897	-4.69897	0.30103	0.30103	-1.69897	-2.69897	-2.69897	0.30103	-1.69897	-4.69897	-1.69897	0.30103	0.30103	-1.69897	0.30103	0	-0.69897	2.09704	0.000867722	1.04139	0.0211893	-2.30103	-4	-5	-3	-2	-2.30103	-2.69897	-7.30103	-0.09691	-6	42	0	1.81414	0
1.30103	-2.69897	0.477121	1.78915	1.04356	-3.30103	1.00996	0.30103	-0.69897	0.30103	-0.69897	-4.69897	0.30103	0.30103	-1.69897	-2.69897	-2.69897	0.30103	-1.69897	-4.69897	-1.69897	0.30103	0.30103	-1.69897	0.30103	0	-0.69897	2.09704	0.00346053	1.04139	0.0211893	-2.30103	-4	-5	-3	-2	-2.30103	-2.69897	-7.30103	-0.09691	-6					0.0142667	0.000166667
1.30103	-1.69897	0.477121	1.78915	1.04356	-3.30103	1.00996	0.30103	-0.69897	0.30103	-0.69897	-4.69897	0.30103	0.30103	-1.69897	-2.69897	-2.69897	0.30103	-1.69897	-4.69897	-1.69897	0.30103	0.30103	-1.69897	0.30103	0	-0.69897	2.09704	0.0261245	1.04139	0.0211893	-2.30103	-4	-5	-3	-2	-2.30103	-2.69897	-7.30103	-0.09691	-6	25	2.65754	0.367288	0.0267516
1.30103	0	0.477121	1.78915	1.04356	-3.30103	1.00996	0.30103	-0.69897	0.30103	-0.69897	-4.69897	0.30103	0.30103	-1.69897	-2.69897	-2.69897	0.30103	-1.69897	-4.69897	-1.69897	0.30103	0.30103	-1.69897	0.30103	0	-0.69897	2.09704	0.602277	1.04139	0.0211893	-2.30103	-4	-5	-3	-2	-2.30103	-2.69897	-7.30103	-0.09691	-6	24.5	1.08012	0.32923	0.0434346
1.30103	0.30103	0.477121	1.78915	1.04356	-0.60206	1.00996	0.30103	-0.69897	0.30103	-0.69897	-4.69897	0.30103	0.30103	-1.69897	-2.69897	-2.69897	0.30103	-1.69897	-4.69897	-1.69897	0.30103	0.30103	-1.69897	0.30103	0	-0.69897	2.09704	0.875177	1.04139	0.0211893	-2.30103	-4	-5	-3	-2	-2.30103	-2.69897	-7.30103	-0.09691	-6	20.625	0.649519	0.609676	0.0340563	1.29224	0.0069435
1.30103	0.30103	0.477121	1.78915	1.04356	-1.30103	1.00996	0.30103	-0.69897	0.30103	-0.69897	-4.69897	0.30103	0.30103	-1.69897	-2.69897	-2.69897	0.30103	-1.69897	-4.69897	-1.69897	0.30103	0.30103	-1.69897	0.30103	0	-0.69897	2.09704	0.851381	1.04139	0.0211893	-2.30103	-4	-5	-3	-2	-2.30103	-2.69897	-7.30103	-0.09691	-6	20.75	0.559017	0.631149	0.0163799	1.26816	0.0110929
1.30103	0.30103	0.477121	1.78915	1.04356	-0.30103	1.00996	0.30103	-0.69897	0.30103	-0.69897	-4.69897	0.30103	0.30103	-1.69897	-2.69897	-2.69897	0.30103	-1.69897	-4.69897	-1.69897	0.30103	0.30103	-1.69897	0.30103	0	-0.69897	2.09704	0.903199	1.04139	0.0211893	-2.30103	-4	-5	-3	-2	-2.30103	-2.69897	-7.30103	-0.09691	-6	19.3333	0.552771	0.615119	0.0149387	1.27785	0.013815
1.30103	0.30103	0.477121	1.78915	1.04356	0.69897	1.00996	0.30103	-0.69897	0.30103	-0.69897	-4.69897	0.30103	0.30103	-1.69897	-2.69897	-2.69897	0.30103	-1.69897	-4.69897	-1.69897	0.30103	0.30103	-1.69897	0.30103	0	-0.69897	2.09704	1.2305	1.04139	0.0211893	-2.30103	-4	-5	-3	-2	-2.30103	-2.69897	-7.30103	-0.09691	-6	17.0833	0.399653	0.615706	0.0316652	1.27729	0.0112105
1.30103	0.30103	0.477121	1.78915	1.04356	1.69897	1.00996	0.30103	-0.69897	0.30103	-0.69897	-4.69897	0.30103	0.30103	-1.69897	-2.69897	-2.69897	0.30103	-1.69897	-4.69897	-1.69897	0.30103	0.30103	-1.69897	0.30103	0	-0.69897	2.09704	2.02939	1.04139	0.0211893	-2.30103	-4	-5	-3	-2	-2.30103	-2.69897	-7.30103	-0.09691	-6	14.5	0.540062	0.754891	0.0217488	1.13177	0.0475838
1.30103	0.30103	0.477121	1.78915	1.04337	-3.30103	1.00996	0.30103	-0.69897	0.30103	-0.69897	-4.69897	0.30103	0.30103	-1.69897	-2.69897	-2.69897	0.30103	-1.69897	-4.69897	-1.69897	0.30103	0.30103	-1.69897	0.30103	0	-0.69897	2.09704	0.845222	1.04139	0.0211893	-6.30103	-4	-5	-3	-2	-2.30103	-2.69897	-7.30103	-0.09691	-6	23.7917	0.476897	0.434214	0.0274629
1.30103	0.30103	0.477121	1.78915	1.04337	-3.30103	1.00996	0.30103	-0.69897	0.30103	-0.69897	-4.69897	0.30103	0.30103	-1.69897	-2.69897	-2.69897	0.30103	-1.69897	-4.69897	-1.69897	0.30103	0.30103	-1.69897	0.30103	0	-0.69897	2.09704	0.845222	1.04139	0.0211893	-4.30103	-4	-5	-3	-2	-2.30103	-2.69897	-7.30103	-0.09691	-6	23.0833	0.606676	0.428289	0.0152655
1.30103	0.30103	0.477121	1.78915	1.04339	-3.30103	1.00996	0.30103	-0.69897	0.30103	-0.69897	-4.69897	0.30103	0.30103	-1.69897	-2.69897	-2.69897	0.30103	-1.69897	-4.69897	-1.69897	0.30103	0.30103	-1.69897	0.30103	0	-0.69897	2.09704	0.845222	1.04139	0.0211893	-3.30103	-4	-5	-3	-2	-2.30103	-2.69897	-7.30103	-0.09691	-6	22.7917	0.690963	0.567011	0.0207686
1.30103	0.30103	0.477121	1.78915	1.04435	-3.30103	1.00996	0.30103	-0.69897	0.30103	-0.69897	-4.69897	0.30103	0.30103	-1.69897	-2.69897	-2.69897	0.30103	-1.69897	-4.69897	-1.69897	0.30103	0.30103	-1.69897	0.30103	0	-0.69897	2.09704	0.845222	1.04139	0.0211893	-1.60206	-4	-5	-3	-2	-2.30103	-2.69897	-7.30103	-0.09691	-6	20.5	0.456435	0.679816	0.00523905	1.25729	0.0270368
1.30103	0.30103	0.477121	1.78915	1.04533	-3.30103	1.00996	0.30103	-0.69897	0.30103	-0.69897	-4.69897	0.30103	0.30103	-1.69897	-2.69897	-2.69897	0.30103	-1.69897	-4.69897	-1.69897	0.30103	0.30103	-1.69897	0.30103	0	-0.69897	2.09704	0.845222	1.04139	0.0211893	-1.30103	-4	-5	-3	-2	-2.30103	-2.69897	-7.30103	-0.09691	-6	20	0.73598	0.679997	0.00611481	1.29285	0.0309181
1.30103	0.30103	0.477121	1.78915	1.04356	-3.30103	1.00996	0.30103	-0.69897	0.30103	-0.69897	-4.69897	0.30103	0.30103	-1.69897	-2.69897	-2.69897	0.30103	-1.69897	-4.69897	-1.69897	0.30103	0.30103	-1.69897	0.30103	0	-0.69897	2.09704	0.845222	1.04139	0.0211893	-2.30103	-8	-5	-3	-2	-2.30103	-2.69897	-7.30103	-0.09691	-6	21	0.456435	0.633934	0.0309951	1.22982	0.0143648
1.30103	0.30103	0.477121	1.78915	1.04356	-3.30103	1.00996	0.30103	-0.69897	0.30103	-0.69897	-4.69897	0.30103	0.30103	-1.69897	-2.69897	-2.69897	0.30103	-1.69897	-4.69897	-1.69897	0.30103	0.30103	-1.69897	0.30103	0	-0.69897	2.09704	0.845222	1.04139	0.0211893	-2.30103	-6	-5	-3	-2	-2.30103	-2.69897	-7.30103	-0.09691	-6	21.2083	0.379601	0.585415	0.0179875	1.22957	0.00783683
1.30103	0.30103	0.477121	1.78915	1.04356	-3.30103	1.00996	0.30103	-0.69897	0.30103	-0.69897	-4.69897	0.30103	0.30103	-1.69897	-2.69897	-2.69897	0.30103	-1.69897	-4.69897	-1.69897	0.30103	0.30103	-1.69897	0.30103	0	-0.69897	2.09704	0.845222	1.04139	0.0211893	-2.30103	-5	-5	-3	-2	-2.30103	-2.69897	-7.30103	-0.09691	-6	21.2083	0.627772	0.554762	0.0263005	1.23557	0.0104105
1.30103	0.30103	0.477121	1.78915	1.04358	-3.30103	1.00996	0.30103	-0.69897	0.30103	-0.69897	-4.69897	0.30103	0.30103	-1.69897	-2.69897	-2.69897	0.30103	-1.69897	-4.69897	-1.69897	0.30103	0.30103	-1.69897	0.30103	0	-0.69897	2.09704	0.845222	1.04139	0.0211893	-2.30103	-3.30103	-5	-3	-2	-2.30103	-2.69897	-7.30103	-0.09691	-6	21.7917	0.379601	0.538079	0.0256607	1.28307	0.011636
1.30103	0.30103	0.477121	1.78915	1.0436	-3.30103	1.00996	0.30103	-0.69897	0.30103	-0.69897	-4.69897	0.30103	0.30103	-1.69897	-2.69897	-2.69897	0.30103	-1.69897	-4.69897	-1.69897	0.30103	0.30103	-1.69897	0.30103	0	-0.69897	2.09704	0.845222	1.04139	0.0211893	-2.30103	-3	-5	-3	-2	-2.30103	-2.69897	-7.30103	-0.09691	-6	21.375	0.216506	0.609648	0.0331842	1.30035	0.0157216
1.30103	0.30103	0.477121	1.78915	1.04356	-3.30103	1.00996	0.30103	-0.69897	0.30103	-0.69897	-4.69897	0.30103	0.30103	-1.69897	-2.69897	-2.69897	0.30103	-1.69897	-4.69897	-1.69897	0.30103	0.30103	-1.69897	0.30103	0	-0.69897	2.09704	0.845098	1.04139	0.0211893	-2.30103	-4	-5	-6	-2	-2.30103	-2.69897	-7.30103	-0.09691	-6	21.75	0.433013	0.641069	0.027578	1.28121	0.0125597
1.30103	0.30103	0.477121	1.78915	1.04356	-3.30103	1.00996	0.30103	-0.69897	0.30103	-0.69897	-4.69897	0.30103	0.30103	-1.69897	-2.69897	-2.69897	0.30103	-1.69897	-4.69897	-1.69897	0.30103	0.30103	-1.69897	0.30103	0	-0.69897	2.09704	0.84511	1.04139	0.0211893	-2.30103	-4	-5	-4	-2	-2.30103	-2.69897	-7.30103	-0.09691	-6	21.9583	0.431003	0.691726	0.0161129	1.28524	0.0110859
1.30103	0.30103	0.477121	1.78915	1.04356	-3.30103	1.00996	0.30103	-0.69897	0.30103	-0.69897	-4.69897	0.30103	0.30103	-1.69897	-2.69897	-2.69897	0.30103	-1.69897	-4.69897	-1.69897	0.30103	0.30103	-1.69897	0.30103	0	-0.69897	2.09704	0.845718	1.04139	0.0211893	-2.30103	-4	-5	-2.30103	-2	-2.30103	-2.69897	-7.30103	-0.09691	-6	22	0.456435	0.564272	0.0142095	1.22896	0.00971107
1.30103	0.30103	0.477121	1.78915	1.04356	-3.30103	1.00996	0.30103	-0.69897	0.30103	-0.69897	-4.69897	0.30103	0.30103	-1.69897	-2.69897	-2.69897	0.30103	-1.69897	-4.69897	-1.69897	0.30103	0.30103	-1.69897	0.30103	0	-0.69897	2.09704	0.846337	1.04139	0.0211893	-2.30103	-4	-5	-2	-2	-2.30103	-2.69897	-7.30103	-0.09691	-6	22.125	0.544862	0.574628	0.0351058	1.2641	0.012435
1.30103	0.30103	0.477121	1.78915	1.04356	-3.30103	1.00996	0.30103	-0.69897	0.30103	-0.69897	-4.69897	0.30103	0.30103	-1.69897	-2.69897	-2.69897	0.30103	-1.69897	-4.69897	-1.69897	0.30103	0.30103	-1.69897	0.30103	0	-0.69897	2.09704	0.857332	1.04139	0.0211893	-2.30103	-4	-5	-1	-2	-2.30103	-2.69897	-7.30103	-0.09691	-6	21.7083	0.627772	0.621359	0.0291225	1.29721	0.00975281
1.30103	0.30103	0.477121	1.78915	1.04356	-3.30103	1.00996	0.30103	-0.69897	0.30103	-0.69897	-4.69897	0.30103	0.30103	-1.69897	-2.69897	-2.69897	0.30103	-1.69897	-4.69897	-1.69897	0.30103	0.30103	-1.69897	0.30103	0	-0.69897	2.09704	0.845222	1.04139	0.0211893	-2.30103	-4	-7	-3	-2	-2.30103	-2.69897	-7.30103	-0.09691	-6	19.5833	9.21012	0.35363	0.162461	1.25154	0.00755244
1.30103	0.30103	0.477121	1.78915	1.04356	-3.30103	1.00996	0.30103	-0.69897	0.30103	-0.69897	-4.69897	0.30103	0.30103	-1.69897	-2.69897	-2.69897	0.30103	-1.69897	-4.69897	-1.69897	0.30103	0.30103	-1.69897	0.30103	0	-0.69897	2.09704	0.845222	1.04139	0.0211893	-2.30103	-4	-4.30103	-3	-2	-2.30103	-2.69897	-7.30103	-0.09691	-6	21.5	0.5	0.598898	0.0481856	1.26779	0.0189697
1.30103	0.30103	0.477121	1.78915	1.04357	-3.30103	1.00996	0.30103	-0.69897	0.30103	-0.69897	-4.69897	0.30103	0.30103	-1.69897	-2.69897	-2.69897	0.30103	-1.69897	-4.69897	-1.69897	0.30103	0.30103	-1.69897	0.30103	0	-0.69897	2.09704	0.845222	1.04139	0.0211893	-2.30103	-4	-4	-3	-2	-2.30103	-2.69897	-7.30103	-0.09691	-6	21.5	0.57735	0.596264	0.0192375	1.26135	0.0118651
1.30103	0.30103	0.477121	1.78915	1.0436	-3.30103	1.00996	0.30103	-0.69897	0.30103	-0.69897	-4.69897	0.30103	0.30103	-1.69897	-2.69897	-2.69897	0.30103	-1.69897	-4.69897	-1.69897	0.30103	0.30103	-1.69897	0.30103	0	-0.69897	2.09704	0.845222	1.04139	0.0211893	-2.30103	-4	-3	-3	-2	-2.30103	-2.69897	-7.30103	-0.09691	-6	22.1667	0.552771	0.653709	0.0207314	1.23635	0.015563
1.30103	0.30103	0.477121	1.78915	1.04396	-3.30103	1.00996	0.30103	-0.69897	0.30103	-0.69897	-4.69897	0.30103	0.30103	-1.69897	-2.69897	-2.69897	0.30103	-1.69897	-4.69897	-1.69897	0.30103	0.30103	-1.69897	0.30103	0	-0.69897	2.09704	0.845222	1.04139	0.0211893	-2.30103	-4	-2	-3	-2	-2.30103	-2.69897	-7.30103	-0.09691	-6	23.5833	0.640095	0.59819	0.0208993	1.23765	0.0105037
1.30103	0.30103	0.477121	1.78915	1.04356	-3.30103	1.00954	0.30103	-0.69897	0.30103	-0.69897	-4.69897	0.30103	0.30103	-1.69897	-2.69897	-2.69897	0.30103	-1.69897	-4.69897	-1.69897	0.30103	0.30103	-1.69897	0.30103	0	-0.69897	2.09704	0.845222	1.04139	0.0211893	-2.30103	-4	-5	-3	-6	-2.30103	-2.69897	-7.30103	-0.09691	-6	19.4583	0.476897	0.534722	0.0329391	1.24354	0.0092249
1.30103	0.30103	0.477121	1.78915	1.04356	-3.30103	1.00954	0.30103	-0.69897	0.30103	-0.69897	-4.69897	0.30103	0.30103	-1.69897	-2.69897	-2.69897	0.30103	-1.69897	-4.69897	-1.69897	0.30103	0.30103	-1.69897	0.30103	0	-0.69897	2.09704	0.845222	1.04139	0.0211893	-2.30103	-4	-5	-3	-4	-2.30103	-2.69897	-7.30103	-0.09691	-6	19	0.288675	0.56976	0.0293889	1.25266	0.0103399
1.30103	0.30103	0.477121	1.78915	1.04356	-3.30103	1.00958	0.30103	-0.69897	0.30103	-0.69897	-4.69897	0.30103	0.30103	-1.69897	-2.69897	-2.69897	0.30103	-1.69897	-4.69897	-1.69897	0.30103	0.30103	-1.69897	0.30103	0	-0.69897	2.09704	0.845222	1.04139	0.0211893	-2.30103	-4	-5	-3	-3	-2.30103	-2.69897	-7.30103	-0.09691	-6	18.9583	0.320048	0.637316	0.0302084	1.25882	0.0121448
1.30103	0.30103	0.477121	1.78915	1.04356	-3.30103	1.01166	0.30103	-0.69897	0.30103	-0.69897	-4.69897	0.30103	0.30103	-1.69897	-2.69897	-2.69897	0.30103	-1.69897	-4.69897	-1.69897	0.30103	0.30103	-1.69897	0.30103	0	-0.69897	2.09704	0.845222	1.04139	0.0211893	-2.30103	-4	-5	-3	-1.30103	-2.30103	-2.69897	-7.30103	-0.09691	-6	19.6818	0.385695	0.593072	0.0159015	1.29499	0.00932374
1.30103	0.30103	0.477121	1.78915	1.04356	-3.30103	1.01376	0.30103	-0.69897	0.30103	-0.69897	-4.69897	0.30103	0.30103	-1.69897	-2.69897	-2.69897	0.30103	-1.69897	-4.69897	-1.69897	0.30103	0.30103	-1.69897	0.30103	0	-0.69897	2.09704	0.845222	1.04139	0.0211893	-2.30103	-4	-5	-3	-1	-2.30103	-2.69897	-7.30103	-0.09691	-6	20.4545	0.396264	0.609942	0.0256605	1.2921	0.0123865
1.30103	0.30103	0.477121	1.78915	1.04356	-3.30103	1.00996	0.30103	-0.69897	0.30103	-0.69897	-4.69897	0.30103	0.30103	-1.69897	-2.69897	-2.69897	0.30103	-1.69897	-4.69897	-1.69897	0.30103	0.30103	-1.69897	0.30103	0	-0.69897	2.09704	0.845222	1.04139	0.0211893	-2.30103	-4	-5	-3	-2	-2.30103	-5.69897	-7.30103	-0.09691	-6	19.3333	0.552771	0.557665	0.0326751	1.25343	0.010037
1.30103	0.30103	0.477121	1.78915	1.04356	-3.30103	1.00996	0.30103	-0.69897	0.30103	-0.69897	-4.69897	0.30103	0.30103	-1.69897	-2.69897	-2.69897	0.30103	-1.69897	-4.69897	-1.69897	0.30103	0.30103	-1.69897	0.30103	0	-0.69897	2.09704	0.845222	1.04139	0.0211893	-2.30103	-4	-5	-3	-2	-2.30103	-3.69897	-7.30103	-0.09691	-6	19	0.408248	0.486589	0.019398	1.24788	0.00779165
1.30103	0.30103	0.477121	1.78915	1.04356	-3.30103	1.00996	0.30103	-0.69897	0.30103	-0.69897	-4.69897	0.30103	0.30103	-1.69897	-2.69897	-2.69897	0.30103	-1.69897	-4.69897	-1.69897	0.30103	0.30103	-1.69897	0.30103	0	-0.69897	2.09704	0.845222	1.04139	0.0211893	-2.30103	-4	-5	-3	-2	-2.30103	-2	-7.30103	-0.09691	-6	18.75	7.45682	0.408179	0.195246	1.26585	0.00780476
1.30103	0.30103	0.477121	1.78915	1.04356	-3.30103	1.00996	0.30103	-0.69897	0.30103	-0.69897	-4.69897	0.30103	0.30103	-1.69897	-2.69897	-2.69897	0.30103	-1.69897	-4.69897	-1.69897	0.30103	0.30103	-1.69897	0.30103	0	-0.69897	2.09704	0.845222	1.04139	0.0211893	-2.30103	-4	-5	-3	-2	-2.30103	-1.69897	-7.30103	-0.09691	-6	18.75	0.520416	0.659909	0.0264763	1.28638	0.0129048
1.30103	0.30103	0.477121	1.78915	1.04356	-3.30103	1.00996	0.30103	-0.69897	0.30103	-0.69897	-4.69897	0.30103	0.30103	-1.69897	-2.69897	-2.69897	0.30103	-1.69897	-4.69897	-1.69897	0.30103	0.30103	-1.69897	0.30103	0	-0.69897	2.09704	0.845222	1.04139	0.0211893	-2.30103	-4	-5	-3	-2	-2.30103	-0.69897	-7.30103	-0.09691	-6	19.3333	0.471405	0.55955	0.03259	1.26524	0.0101975
1.30103	0.30103	0.477121	1.78915	1.04356	-3.30103	1.00996	0.30103	-0.69897	0.30103	-0.69897	-4.69897	0.30103	0.30103	-1.69897	-2.69897	-2.69897	0.30103	-1.69897	-4.69897	-1.69897	0.30103	0.30103	-1.69897	0.30103	0	-0.69897	2.09704	0.845222	1.04139	0.0211893	-2.30103	-4	-5	-3	-2	-2.30103	-2.69897	-5.60206	-0.09691	-6	19.5	0.408248	0.585563	0.0372353	1.27827	0.013832
1.30103	0.30103	0.477121	1.78915	1.04356	-3.30103	1.00996	0.30103	-0.69897	0.30103	-0.69897	-4.69897	0.30103	0.30103	-1.69897	-2.69897	-2.69897	0.30103	-1.69897	-4.69897	-1.69897	0.30103	0.30103	-1.69897	0.30103	0	-0.69897	2.09704	0.845222	1.04139	0.0211893	-2.30103	-4	-5	-3	-2	-2.30103	-2.69897	-5.30103	-0.09691	-6	19.1667	0.311805	0.619766	0.0283995	1.2741	0.0171037
1.30103	0.30103	0.477121	1.78915	1.04356	-3.30103	1.00996	0.30103	-0.69897	0.30103	-0.69897	-4.69897	0.30103	0.30103	-1.69897	-2.69897	-2.69897	0.30103	-1.69897	-4.69897	-1.69897	0.30103	0.30103	-1.69897	0.30103	0	-0.69897	2.09704	0.845222	1.04139	0.0211893	-2.30103	-4	-5	-3	-2	-2.30103	-2.69897	-4.30103	-0.09691	-6	19.75	0.381881	0.525049	0.0234755	1.27443	0.0132197
1.30103	0.30103	0.477121	1.78915	1.04356	-3.30103	1.00996	0.30103	-0.69897	0.30103	-0.69897	-4.69897	0.30103	0.30103	-1.69897	-2.69897	-2.69897	0.30103	-1.69897	-4.69897	-1.69897	0.30103	0.30103	-1.69897	0.30103	0	-0.69897	2.09704	0.845222	1.04139	0.0211893	-2.30103	-4	-5	-3	-2	-2.30103	-2.69897	-3.30103	-0.09691	-6	19.8333	0.372678	0.503945	0.0247312	1.25402	0.0157716
1.30103	0.30103	0.477121	1.78915	1.04356	-3.30103	1.00996	0.30103	-0.69897	0.30103	-0.69897	-4.69897	0.30103	0.30103	-1.69897	-2.69897	-2.69897	0.30103	-1.69897	-4.69897	-1.69897	0.30103	0.30103	-1.69897	0.30103	0	-0.69897	2.09704	0.845222	1.04139	0.0211893	-2.30103	-4	-5	-3	-2	-2.30103	-2.69897	-2.30103	-0.09691	-6	19.5417	0.518746	0.441659	0.03682	1.21143	0.00166667
1.30103	0.30103	0.477121	1.78915	1.04356	-3.30103	1.00996	0.30103	-0.69897	0.30103	-0.69897	-4.69897	0.30103	0.30103	-1.69897	-2.69897	-2.69897	0.30103	-1.69897	-4.69897	-1.69897	0.30103	0.30103	-1.69897	0.30103	0	-0.69897	2.09704	0.845222	1.04139	0.0211893	-2.30103	-4	-5	-3	-2	-6.30103	-2.69897	-7.30103	-0.09691	-6	16.7083	0.431003	0.663873	0.0241594	1.27116	0.0121532
1.30103	0.30103	0.477121	1.78915	1.04356	-3.30103	1.00996	0.30103	-0.69897	0.30103	-0.69897	-4.69897	0.30103	0.30103	-1.69897	-2.69897	-2.69897	0.30103	-1.69897	-4.69897	-1.69897	0.30103	0.30103	-1.69897	0.30103	0	-0.69897	2.09704	0.845222	1.04139	0.0211893	-2.30103	-4	-5	-3	-2	-4.30103	-2.69897	-7.30103	-0.09691	-6	16.3333	0.372678	0.591989	0.0316307	1.27907	0.0175132
1.30103	0.30103	0.477121	1.78915	1.04356	-3.30103	1.00996	0.30103	-0.69897	0.30103	-0.69897	-4.69897	0.30103	0.30103	-1.69897	-2.69897	-2.69897	0.30103	-1.69897	-4.69897	-1.69897	0.30103	0.30103	-1.69897	0.30103	0	-0.69897	2.09704	0.845222	1.04139	0.0211893	-2.30103	-4	-5	-3	-2	-3.30103	-2.69897	-7.30103	-0.09691	-6	16.8333	0.513701	0.569109	0.0224971	1.28116	0.0124267
1.30103	0.30103	0.477121	1.78915	1.04356	-3.30103	1.00996	0.30103	-0.69897	0.30103	-0.69897	-4.69897	0.30103	0.30103	-1.69897	-2.69897	-2.69897	0.30103	-1.69897	-4.69897	-1.69897	0.30103	0.30103	-1.69897	0.30103	0	-0.69897	2.09704	0.845222	1.04139	0.0211893	-2.30103	-4	-5	-3	-2	-1.60206	-2.69897	-7.30103	-0.09691	-6	23.7083	0.557462	0.582221	0.0130144	1.23488	0.0114902
1.30103	0.30103	0.477121	1.78915	1.04356	-3.30103	1.00996	0.30103	-0.69897	0.30103	-0.69897	-4.69897	0.30103	0.30103	-1.69897	-2.69897	-2.69897	0.30103	-1.69897	-4.69897	-1.69897	0.30103	0.30103	-1.69897	0.30103	0	-0.69897	2.09704	0.845222	1.04139	0.0211893	-2.30103	-4	-5	-3	-2	-1.30103	-2.69897	-7.30103	-0.09691	-6	25.9583	0.557462	0.580928	0.0158321	1.23122	0.0104691
1.30103	0.30103	0.477121	1.78915	1.04356	-3.30103	1.00996	0.30103	-0.69897	0.30103	-0.69897	-4.69897	0.30103	0.30103	-1.69897	-2.69897	-2.69897	0.30103	-1.69897	-4.69897	-1.69897	0.30103	0.30103	-1.69897	0.30103	0	-0.69897	2.09704	0.845222	1.04139	0.0211893	-2.30103	-4	-5	-3	-2	-2.30103	-2.69897	-7.30103	-5.09691	-6	19.5833	0.399653	0.568241	0.0299666	1.25935	0.0139537
1.30103	0.30103	0.477121	1.78915	1.04356	-3.30103	1.00996	0.30103	-0.69897	0.30103	-0.69897	-4.69897	0.30103	0.30103	-1.69897	-2.69897	-2.69897	0.30103	-1.69897	-4.69897	-1.69897	0.30103	0.30103	-1.69897	0.30103	0	-0.69897	2.09704	0.845222	1.04139	0.0211893	-2.30103	-4	-5	-3	-2	-2.30103	-2.69897	-7.30103	-3.09691	-6	19.125	0.505181	0.670898	0.0152415	1.27452	0.0183076
1.30103	0.30103	0.477121	1.78915	1.04356	-3.30103	1.00996	0.30103	-0.69897	0.30103	-0.69897	-4.69897	0.30103	0.30103	-1.69897	-2.69897	-2.69897	0.30103	-1.69897	-4.69897	-1.69897	0.30103	0.30103	-1.69897	0.30103	0	-0.69897	2.09704	0.845222	1.04139	0.0211893	-2.30103	-4	-5	-3	-2	-2.30103	-2.69897	-7.30103	-2.09691	-6	19.4167	0.399653	0.671575	0.0120163	1.27391	0.0126633
1.30103	0.30103	0.477121	1.78915	1.04356	-3.30103	1.00996	0.30103	-0.69897	0.30103	-0.69897	-4.69897	0.30103	0.30103	-1.69897	-2.69897	-2.69897	0.30103	-1.69897	-4.69897	-1.69897	0.30103	0.30103	-1.69897	0.30103	0	-0.69897	2.09704	0.845222	1.04139	0.0211893	-2.30103	-4	-5	-3	-2	-2.30103	-2.69897	-7.30103	-1.09691	-6	19.3333	0.552771	0.658466	0.016344	1.28135	0.0242823
1.30103	0.30103	0.477121	1.78915	1.04356	-3.30103	1.00996	0.30103	-0.69897	0.30103	-0.69897	-4.69897	0.30103	0.30103	-1.69897	-2.69897	-2.69897	0.30103	-1.69897	-4.69897	-1.69897	0.30103	0.30103	-1.69897	0.30103	0	-0.69897	2.09704	0.845222	1.04139	0.0211893	-2.30103	-4	-5	-3	-2	-2.30103	-2.69897	-7.30103	-0.39794	-6	19.2917	0.431003	0.677177	0.0153662	1.28982	0.0270705
1.30103	0.30103	0.477121	1.78915	1.04356	-3.30103	1.00996	0.30103	-0.69897	0.30103	-0.69897	-4.69897	0.30103	0.30103	-1.69897	-2.69897	-2.69897	0.30103	-1.69897	-4.69897	-1.69897	0.30103	0.30103	-1.69897	0.30103	0	-0.69897	2.09704	0.845222	1.04139	0.0211893	-2.30103	-4	-5	-3	-2	-2.30103	-2.69897	-7.30103	-0.09691	-4.30103	19.0833	0.448764	0.576383	0.0328014	1.2536	0.0147073
1.30103	0.30103	0.477121	1.78915	1.04356	-3.30103	1.00996	0.30103	-0.69897	0.30103	-0.69897	-4.69897	0.30103	0.30103	-1.69897	-2.69897	-2.69897	0.30103	-1.69897	-4.69897	-1.69897	0.30103	0.30103	-1.69897	0.30103	0	-0.69897	2.09704	0.845222	1.04139	0.0211893	-2.30103	-4	-5	-3	-2	-2.30103	-2.69897	-7.30103	-0.09691	-4	19.0417	0.431003	0.649444	0.0137687	1.25454	0.00843311
1.30103	0.30103	0.477121	1.78915	1.04356	-3.30103	1.00996	0.30103	-0.69897	0.30103	-0.69897	-4.69897	0.30103	0.30103	-1.69897	-2.69897	-2.69897	0.30103	-1.69897	-4.69897	-1.69897	0.30103	0.30103	-1.69897	0.30103	0	-0.69897	2.09704	0.845222	1.04139	0.0211893	-2.30103	-4	-5	-3	-2	-2.30103	-2.69897	-7.30103	-0.09691	-3	18.5417	0.246503	0.670073	0.0121136	1.26466	0.0124315
1.30103	0.30103	0.477121	1.78915	1.04356	-3.30103	1.00996	0.30103	-0.69897	0.30103	-0.69897	-4.69897	0.30103	0.30103	-1.69897	-2.69897	-2.69897	0.30103	-1.69897	-4.69897	-1.69897	0.30103	0.30103	-1.69897	0.30103	0	-0.69897	2.09704	0.845222	1.04139	0.0211893	-2.30103	-4	-5	-3	-2	-2.30103	-2.69897	-7.30103	-0.09691	-2	19.0417	0.431003	0.599393	0.0238039	1.25841	0.00869276
1.30103	0.30103	0.477121	1.78915	1.04356	-3.30103	1.00996	0.30103	-0.69897	0.30103	-0.69897	-4.69897	0.30103	0.30103	-1.69897	-2.69897	-2.69897	0.30103	-1.69897	-4.69897	-1.69897	0.30103	0.30103	-1.69897	0.30103	0	-0.69897	2.09704	0.845222	1.04139	0.0211893	-2.30103	-4	-5	-3	-2	-2.30103	-2.69897	-7.30103	-0.09691	-1	19.375	0.505181	0.66904	0.0186915	1.29013	0.0200515
2.30103	-0.69897	1.47712	2.14771	1.04381	0.69897	1.38817	-0.69897	0.30103	-2.69897	-2.69897	-2.69897	-0.69897	-0.69897	-2.69897	-0.69897	-0.69897	-2.69897	0.30103	0.30103	-0.69897	-2.69897	-2.69897	-0.69897	-2.69897	-1	-2.69897	1.8873	2.16885	0.00432137	-2.82391	-1.30103	-3	-2	-2	-4	-4.30103	-3.69897	-5.30103	-3.09691	-2	7.5	0.316228	0.856646	0.00969787	0.7191	0.0225758
2.30103	-0.69897	1.47712	2.2335	1.04381	0.69897	1.38817	-0.69897	0.30103	-2.69897	-2.69897	-2.69897	-0.69897	-0.69897	-2.69897	-0.69897	-0.69897	-2.69897	0.30103	0.30103	-0.69897	-2.69897	-2.69897	-0.69897	-2.69897	-1	-2.69897	2.14151	2.16885	0.00432137	-2.82391	-1.30103	-3	-2	-2	-4	-4.30103	-3.69897	-5.30103	-3.09691	-2	7.4	0.374166	0.853064	0.0255019	0.804322	0.0220963
2.30103	-0.69897	1.47712	2.30524	1.04381	0.69897	1.38817	-0.69897	0.30103	-2.69897	-2.69897	-2.69897	-0.69897	-0.69897	-2.69897	-0.69897	-0.69897	-2.69897	0.30103	0.30103	-0.69897	-2.69897	-2.69897	-0.69897	-2.69897	-1	-2.69897	2.30107	2.16885	0.00432137	-2.82391	-1.30103	-3	-2	-2	-4	-4.30103	-3.69897	-5.30103	-3.09691	-2	5	3.02765	0.585197	0.384375	0.859544	0.0162215
2.30103	-0.69897	1.47712	2.3668	1.04381	0.69897	1.38817	-0.69897	0.30103	-2.69897	-2.69897	-2.69897	-0.69897	-0.69897	-2.69897	-0.69897	-0.69897	-2.69897	0.30103	0.30103	-0.69897	-2.69897	-2.69897	-0.69897	-2.69897	-1	-2.69897	2.4175	2.16885	0.00432137	-2.82391	-1.30103	-3	-2	-2	-4	-4.30103	-3.69897	-5.30103	-3.09691	-2	8.3	0.244949	0.765858	0.0144141	0.890378	0.0223635
2.30103	-0.69897	1.47712	2.4207	1.04381	0.69897	1.38817	-0.69897	0.30103	-2.69897	-2.69897	-2.69897	-0.69897	-0.69897	-2.69897	-0.69897	-0.69897	-2.69897	0.30103	0.30103	-0.69897	-2.69897	-2.69897	-0.69897	-2.69897	-1	-2.69897	2.50923	2.16885	0.00432137	-2.82391	-1.30103	-3	-2	-2	-4	-4.30103	-3.69897	-5.30103	-3.09691	-2	9	0.451577	0.742519	0.0255915	0.934875	0.0250734
2.30103	-0.69897	1.47712	2.27065	1.04381	0.69897	1.38817	-0.69897	0.30103	-2.69897	-2.69897	-2.69897	-0.69897	-0.69897	-2.69897	-0.69897	-0.69897	-2.69897	0.30103	0.30103	-0.69897	-2.69897	-2.69897	-0.69897	-2.69897	-1	-2.69897	2.39104	2.16885	0.00432137	-2.82391	-1.30103	-3	-2	-2	-4	-4.30103	-3.69897	-5.30103	-3.09691	-2	11.75	0.75	0.756084	0.107477	0.96508	0.00683825
2.30103	-0.69897	1.47712	2.29546	1.04381	0.69897	1.38817	-0.69897	0.30103	-2.69897	-2.69897	-2.69897	-0.69897	-0.69897	-2.69897	-0.69897	-0.69897	-2.69897	0.30103	0.30103	-0.69897	-2.69897	-2.69897	-0.69897	-2.69897	-1	-2.69897	2.40997	2.16885	0.00432137	-2.82391	-1.30103	-3	-2	-2	-4	-4.30103	-3.69897	-5.30103	-3.09691	-2	7.08333	3.81244	0.800133	0.10906	0.948211	0.0264573
2.30103	-0.69897	1.47712	2.319	1.04381	0.69897	1.38817	-0.69897	0.30103	-2.69897	-2.69897	-2.69897	-0.69897	-0.69897	-2.69897	-0.69897	-0.69897	-2.69897	0.30103	0.30103	-0.69897	-2.69897	-2.69897	-0.69897	-2.69897	-1	-2.69897	2.42817	2.16885	0.00432137	-2.82391	-1.30103	-3	-2	-2	-4	-4.30103	-3.69897	-5.30103	-3.09691	-2	8.58333	0.731247	0.763744	0.0403619	0.9526	0.0109996
2.30103	-0.69897	1.47712	2.35209	1.04381	0.69897	1.38817	-0.69897	0.30103	-2.69897	-2.69897	-2.69897	-0.69897	-0.69897	-2.69897	-0.69897	-0.69897	-2.69897	0.30103	0.30103	-0.69897	-2.69897	-2.69897	-0.69897	-2.69897	-1	-2.69897	2.45411	2.16885	0.00432137	-2.82391	-1.30103	-3	-2	-2	-4	-4.30103	-3.69897	-5.30103	-3.09691	-2	5.66667	3.65908	0.793422	0.022755	0.953656	0.00734763
2.30103	-0.69897	1.47712	2.30103	1.04381	0.69897	1.38817	-0.69897	0.30103	-2.69897	-2.69897	-2.69897	-0.69897	-0.69897	-2.69897	-0.69897	-0.69897	-2.69897	0.30103	0.30103	-0.69897	-2.69897	-2.69897	-0.69897	-2.69897	-1	-2.69897	2.50923	1.31429	0.00432137	-2.82391	-1.30103	-3	-2	-2	-4	-4.30103	-3.69897	-5.30103	-3.09691	-2	7.75	0.692219	0.816041	0.0119713	0.815711	0.0115429
2.30103	-0.69897	1.47712	2.34469	1.04381	0.69897	1.38817	-0.69897	0.30103	-2.69897	-2.69897	-2.69897	-0.69897	-0.69897	-2.69897	-0.69897	-0.69897	-2.69897	0.30103	0.30103	-0.69897	-2.69897	-2.69897	-0.69897	-2.69897	-1	-2.69897	2.50923	1.79879	0.00432137	-2.82391	-1.30103	-3	-2	-2	-4	-4.30103	-3.69897	-5.30103	-3.09691	-2	8	0.288675	0.79221	0.0256046	0.856767	0.0123573
2.30103	-0.69897	1.47712	2.38435	1.04381	0.69897	1.38817	-0.69897	0.30103	-2.69897	-2.69897	-2.69897	-0.69897	-0.69897	-2.69897	-0.69897	-0.69897	-2.69897	0.30103	0.30103	-0.69897	-2.69897	-2.69897	-0.69897	-2.69897	-1	-2.69897	2.50923	2.0221	0.00432137	-2.82391	-1.30103	-3	-2	-2	-4	-4.30103	-3.69897	-5.30103	-3.09691	-2	8.33333	0.471405	0.740684	0.0225919	0.896044	0.0156103
2.30103	-0.69897	1.47712	2.45423	1.04381	0.69897	1.38817	-0.69897	0.30103	-2.69897	-2.69897	-2.69897	-0.69897	-0.69897	-2.69897	-0.69897	-0.69897	-2.69897	0.30103	0.30103	-0.69897	-2.69897	-2.69897	-0.69897	-2.69897	-1	-2.69897	2.50923	2.27834	0.00432137	-2.82391	-1.30103	-3	-2	-2	-4	-4.30103	-3.69897	-5.30103	-3.09691	-2	9.5	0	0.697958	0.0231219	0.9337	0.0341405
-1.69897	-0.69897	1.47712	2.4207	1.04381	0.69897	1.38817	-0.69897	0.30103	-2.69897	-2.69897	-2.69897	-0.69897	-0.69897	-2.69897	-0.69897	-0.69897	-2.69897	0.30103	0.30103	-0.69897	-2.69897	-2.69897	-0.69897	-2.69897	-1	-2.69897	2.50923	2.16885	0.00432137	-2.82391	-1.30103	-3	-2	-2	-4	-4.30103	-3.69897	-5.30103	-3.09691	-2	9.16667	0.372678	0.684485	0.0157998	0.1396	0.0015
-0.657577	-0.69897	1.47712	2.4207	1.04381	0.69897	1.38817	-0.69897	0.30103	-2.69897	-2.69897	-2.69897	-0.69897	-0.69897	-2.69897	-0.69897	-0.69897	-2.69897	0.30103	0.30103	-0.69897	-2.69897	-2.69897	-0.69897	-2.69897	-1	-2.69897	2.50923	2.16885	0.00432137	-2.82391	-1.30103	-3	-2	-2	-4	-4.30103	-3.69897	-5.30103	-3.09691	-2	7.66667	0.372678	0.667136	0.0188368	0.1716	0.0033375
0.30103	-0.69897	1.47712	2.4207	1.04381	0.69897	1.38817	-0.69897	0.30103	-2.69897	-2.69897	-2.69897	-0.69897	-0.69897	-2.69897	-0.69897	-0.69897	-2.69897	0.30103	0.30103	-0.69897	-2.69897	-2.69897	-0.69897	-2.69897	-1	-2.69897	2.50923	2.16885	0.00432137	-2.82391	-1.30103	-3	-2	-2	-4	-4.30103	-3.69897	-5.30103	-3.09691	-2	7.66667	0.372678	0.907766	0.0393693	0.312683	0.00294746
1.30103	-0.69897	1.47712	2.4207	1.04381	0.69897	1.38817	-0.69897	0.30103	-2.69897	-2.69897	-2.69897	-0.69897	-0.69897	-2.69897	-0.69897	-0.69897	-2.69897	0.30103	0.30103	-0.69897	-2.69897	-2.69897	-0.69897	-2.69897	-1	-2.69897	2.50923	2.16885	0.00432137	-2.82391	-1.30103	-3	-2	-2	-4	-4.30103	-3.69897	-5.30103	-3.09691	-2	8	0	0.890815	0.0354747	0.7871	0.0213828
2.30103	-0.69897	1.0013	2.4207	0.032014	0.69897	1.38817	-0.69897	0.30103	-2.69897	-2.69897	-2.69897	-0.69897	-0.69897	-2.69897	-0.69897	-0.69897	-2.69897	0.30103	0.30103	-0.69897	-2.69897	-2.69897	-0.69897	-2.69897	-1	-2.69897	2.50923	2.16885	0.00432137	-2.82391	-1.30103	-3	-2	-2	-4	-4.30103	-3.69897	-5.30103	-3.09691	-2	8.83333	0.235702	0.750312	0.00165716	0.932322	0.013427
2.30103	-0.69897	1.00988	2.4207	0.0705919	0.69897	1.38817	-0.69897	0.30103	-2.69897	-2.69897	-2.69897	-0.69897	-0.69897	-2.69897	-0.69897	-0.69897	-2.69897	0.30103	0.30103	-0.69897	-2.69897	-2.69897	-0.69897	-2.69897	-1	-2.69897	2.50923	2.16885	0.00432137	-2.82391	-1.30103	-3	-2	-2	-4	-4.30103	-3.69897	-5.30103	-3.09691	-2	8.91667	0.343592	0.763245	0.00873695	0.926489	0.0137913
2.30103	-0.69897	1.07918	2.4207	0.314183	0.69897	1.38817	-0.69897	0.30103	-2.69897	-2.69897	-2.69897	-0.69897	-0.69897	-2.69897	-0.69897	-0.69897	-2.69897	0.30103	0.30103	-0.69897	-2.69897	-2.69897	-0.69897	-2.69897	-1	-2.69897	2.50923	2.16885	0.00432137	-2.82391	-1.30103	-3	-2	-2	-4	-4.30103	-3.69897	-5.30103	-3.09691	-2	8.83333	0.471405	0.750458	0.0148007	0.943989	0.0152761
2.30103	-0.69897	2.32222	2.4207	2.00459	0.69897	1.38817	-0.69897	0.30103	-2.69897	-2.69897	-2.69897	-0.69897	-0.69897	-2.69897	-0.69897	-0.69897	-2.69897	0.30103	0.30103	-0.69897	-2.69897	-2.69897	-0.69897	-2.69897	-1	-2.69897	2.50923	2.16885	0.00432137	-2.82391	-1.30103	-3	-2	-2	-4	-4.30103	-3.69897	-5.30103	-3.09691	-2	11.4167	0.448764	0.619524	0.0235944	0.8139	0.0324986
2.30103	-0.69897	1.30103	2.4207	1.04381	0.69897	1.15969	-0.69897	0.30103	-2.69897	-2.69897	-2.69897	-0.69897	-0.69897	-2.69897	-0.69897	-0.69897	-2.69897	0.30103	0.30103	-0.69897	-2.69897	-2.69897	-0.69897	-2.69897	-1	-2.69897	2.50923	2.16885	0.00432137	-2.82391	-1.30103	-3	-2	-2	-4	-4.30103	-3.69897	-5.30103	-3.09691	-2	8.66667	0.235702	0.749558	0.0154407	0.948711	0.0193242
2.30103	-0.69897	1.3032	2.4207	1.04381	0.69897	1.16269	-0.69897	0.30103	-2.69897	-2.69897	-2.69897	-0.69897	-0.69897	-2.69897	-0.69897	-0.69897	-2.69897	0.30103	0.30103	-0.69897	-2.69897	-2.69897	-0.69897	-2.69897	-1	-2.69897	2.50923	2.16885	0.00432137	-2.82391	-1.30103	-3	-2	-2	-4	-4.30103	-3.69897	-5.30103	-3.09691	-2	9.08333	0.533594	0.773321	0.0228534	0.953433	0.0064291
2.30103	-0.69897	1.32222	2.4207	1.04381	0.69897	1.18876	-0.69897	0.30103	-2.69897	-2.69897	-2.69897	-0.69897	-0.69897	-2.69897	-0.69897	-0.69897	-2.69897	0.30103	0.30103	-0.69897	-2.69897	-2.69897	-0.69897	-2.69897	-1	-2.69897	2.50923	2.16885	0.00432137	-2.82391	-1.30103	-3	-2	-2	-4	-4.30103	-3.69897	-5.30103	-3.09691	-2	8.58333	0.343592	0.775989	0.0235206	0.959267	0.0159916
2.30103	-0.69897	2.07918	2.4207	1.04381	0.69897	2.05859	-0.69897	0.30103	-2.69897	-2.69897	-2.69897	-0.69897	-0.69897	-2.69897	-0.69897	-0.69897	-2.69897	0.30103	0.30103	-0.69897	-2.69897	-2.69897	-0.69897	-2.69897	-1	-2.69897	2.50923	2.16885	0.00432137	-2.82391	-1.30103	-3	-2	-2	-4	-4.30103	-3.69897	-5.30103	-3.09691	-2	10.75	0.381881	0.641152	0.0179564	0.850767	0.0429982
2.30103	-0.69897	1.47712	2.4207	1.04381	0.69897	1.38817	-4.69897	0.30103	-2.69897	-2.69897	-2.69897	-0.69897	-0.69897	-2.69897	-0.69897	-0.69897	-2.69897	0.30103	0.30103	-0.69897	-2.69897	-2.69897	-0.69897	-2.69897	-1	-2.69897	2.50923	2.16885	0.00432137	-2.82391	-1.30103	-3	-2	-2	-4	-4.30103	-3.69897	-5.30103	-3.09691	-2	9	0.288675	0.737052	0.0225356	0.9096	0.0175486
2.30103	-0.69897	1.47712	2.4207	1.04381	0.69897	1.38817	-2.69897	0.30103	-2.69897	-2.69897	-2.69897	-0.69897	-0.69897	-2.69897	-0.69897	-0.69897	-2.69897	0.30103	0.30103	-0.69897	-2.69897	-2.69897	-0.69897	-2.69897	-1	-2.69897	2.50923	2.16885	0.00432137	-2.82391	-1.30103	-3	-2	-2	-4	-4.30103	-3.69897	-5.30103	-3.09691	-2	9	0	0.745752	0.0195447	0.919489	0.0205196
2.30103	-0.69897	1.47712	2.4207	1.04381	0.69897	1.38817	-1.69897	0.30103	-2.69897	-2.69897	-2.69897	-0.69897	-0.69897	-2.69897	-0.69897	-0.69897	-2.69897	0.30103	0.30103	-0.69897	-2.69897	-2.69897	-0.69897	-2.69897	-1	-2.69897	2.50923	2.16885	0.00432137	-2.82391	-1.30103	-3	-2	-2	-4	-4.30103	-3.69897	-5.30103	-3.09691	-2	9	0.408248	0.725151	0.0234038	0.916433	0.0131191
2.30103	-0.69897	1.47712	2.4207	1.04381	0.69897	1.38817	0.30103	0.30103	-2.69897	-2.69897	-2.69897	-0.69897	-0.69897	-2.69897	-0.69897	-0.69897	-2.69897	0.30103	0.30103	-0.69897	-2.69897	-2.69897	-0.69897	-2.69897	-1	-2.69897	2.50923	2.16885	0.00432137	-2.82391	-1.30103	-3	-2	-2	-4	-4.30103	-3.69897	-5.30103	-3.09691	-2	9.41667	0.343592	0.650837	0.018211	0.905544	0.0148756
2.30103	-0.69897	1.47712	2.4207	1.04381	0.69897	1.3511	-0.69897	-4.69897	-2.69897	-2.69897	-2.69897	-0.69897	-0.69897	-2.69897	-0.69897	-0.69897	-2.69897	0.30103	0.30103	-0.69897	-2.69897	-2.69897	-0.69897	-2.69897	-1	-2.69897	2.50923	2.16885	0.00432137	-2.82391	-1.30103	-3	-2	-2	-4	-4.30103	-3.69897	-5.30103	-3.09691	-2	9.25	0.25	0.728992	0.0287229	0.8156	0.0207746
2.30103	-0.69897	1.47712	2.4207	1.04381	0.69897	1.35114	-0.69897	-2.69897	-2.69897	-2.69897	-2.69897	-0.69897	-0.69897	-2.69897	-0.69897	-0.69897	-2.69897	0.30103	0.30103	-0.69897	-2.69897	-2.69897	-0.69897	-2.69897	-1	-2.69897	2.50923	2.16885	0.00432137	-2.82391	-1.30103	-3	-2	-2	-4	-4.30103	-3.69897	-5.30103	-3.09691	-2	8.66667	0.235702	0.718883	0	0.8311	0.0188574
2.30103	-0.69897	1.47712	2.4207	1.04381	0.69897	1.35149	-0.69897	-1.69897	-2.69897	-2.69897	-2.69897	-0.69897	-0.69897	-2.69897	-0.69897	-0.69897	-2.69897	0.30103	0.30103	-0.69897	-2.69897	-2.69897	-0.69897	-2.69897	-1	-2.69897	2.50923	2.16885	0.00432137	-2.82391	-1.30103	-3	-2	-2	-4	-4.30103	-3.69897	-5.30103	-3.09691	-2	8.91667	0.343592	0.751103	0.0244245	0.848933	0.000833333
2.30103	-0.69897	1.47712	2.4207	1.04381	0.69897	1.35496	-0.69897	-0.69897	-2.69897	-2.69897	-2.69897	-0.69897	-0.69897	-2.69897	-0.69897	-0.69897	-2.69897	0.30103	0.30103	-0.69897	-2.69897	-2.69897	-0.69897	-2.69897	-1	-2.69897	2.50923	2.16885	0.00432137	-2.82391	-1.30103	-3	-2	-2	-4	-4.30103	-3.69897	-5.30103	-3.09691	-2	8.5	0	0.782695	0.0309935	0.935322	0.00930087
2.30103	-0.69897	1.47712	2.4207	1.04381	0.69897	1.38817	-0.69897	0.30103	-4.69897	-2.69897	-2.69897	-0.69897	-0.69897	-2.69897	-0.69897	-0.69897	-2.69897	0.30103	0.30103	-0.69897	-2.69897	-2.69897	-0.69897	-2.69897	-1	-2.69897	2.50923	2.16885	0.00432137	-2.82391	-1.30103	-3	-2	-2	-4	-4.30103	-3.69897	-5.30103	-3.09691	-2	9.83333	0.235702	0.75455	0.0169521	0.9001	0.0256248
2.30103	-0.69897	1.47712	2.4207	1.04381	0.69897	1.38817	-0.69897	0.30103	-1.69897	-2.69897	-2.69897	-0.69897	-0.69897	-2.69897	-0.69897	-0.69897	-2.69897	0.30103	0.30103	-0.69897	-2.69897	-2.69897	-0.69897	-2.69897	-1	-2.69897	2.50923	2.16885	0.00432137	-2.82391	-1.30103	-3	-2	-2	-4	-4.30103	-3.69897	-5.30103	-3.09691	-2	9.5	0.288675	0.794875	0.0323405	0.939878	0.0233378
2.30103	-0.69897	1.47712	2.4207	1.04381	0.69897	1.38817	-0.69897	0.30103	-0.69897	-2.69897	-2.69897	-0.69897	-0.69897	-2.69897	-0.69897	-0.69897	-2.69897	0.30103	0.30103	-0.69897	-2.69897	-2.69897	-0.69897	-2.69897	-1	-2.69897	2.50923	2.16885	0.00432137	-2.82391	-1.30103	-3	-2	-2	-4	-4.30103	-3.69897	-5.30103	-3.09691	-2	9.33333	0.471405	0.771961	0.0416898	0.938267	0.0239326
2.30103	-0.69897	1.47712	2.4207	1.04381	0.69897	1.38817	-0.69897	0.30103	0.30103	-2.69897	-2.69897	-0.69897	-0.69897	-2.69897	-0.69897	-0.69897	-2.69897	0.30103	0.30103	-0.69897	-2.69897	-2.69897	-0.69897	-2.69897	-1	-2.69897	2.50923	2.16885	0.00432137	-2.82391	-1.30103	-3	-2	-2	-4	-4.30103	-3.69897	-5.30103	-3.09691	-2	8.75	0.478714	0.76552	0.0334798	0.918489	0.0407737
2.30103	-0.69897	1.47712	2.4207	1.04381	0.69897	1.38817	-0.69897	0.30103	-2.69897	-4.69897	-2.69897	-0.69897	-0.69897	-2.69897	-0.69897	-0.69897	-2.69897	0.30103	0.30103	-0.69897	-2.69897	-2.69897	-0.69897	-2.69897	-1	-2.69897	2.50923	2.16885	0.00432137	-2.82391	-1.30103	-3	-2	-2	-4	-4.30103	-3.69897	-5.30103	-3.09691	-2	9.8	0.244949	0.745475	0.0267757	0.940044	0.0159599
2.30103	-0.69897	1.47712	2.4207	1.04381	0.69897	1.38817	-0.69897	0.30103	-2.69897	-1.69897	-2.69897	-0.69897	-0.69897	-2.69897	-0.69897	-0.69897	-2.69897	0.30103	0.30103	-0.69897	-2.69897	-2.69897	-0.69897	-2.69897	-1	-2.69897	2.50923	2.16885	0.00432137	-2.82391	-1.30103	-3	-2	-2	-4	-4.30103	-3.69897	-5.30103	-3.09691	-2	6.66667	4.42217	0.78045	0.390148	0.966656	0.0256231
2.30103	-0.69897	1.47712	2.4207	1.04381	0.69897	1.38817	-0.69897	0.30103	-2.69897	-0.69897	-2.69897	-0.69897	-0.69897	-2.69897	-0.69897	-0.69897	-2.69897	0.30103	0.30103	-0.69897	-2.69897	-2.69897	-0.69897	-2.69897	-1	-2.69897	2.50923	2.16885	0.00432137	-2.82391	-1.30103	-3	-2	-2	-4	-4.30103	-3.69897	-5.30103	-3.09691	-2	9.33333	0.471405	0.758372	0.0331926	0.970767	0.0184109
2.30103	-0.69897	1.47712	2.4207	1.04381	0.69897	1.38817	-0.69897	0.30103	-2.69897	0.30103	-2.69897	-0.69897	-0.69897	-2.69897	-0.69897	-0.69897	-2.69897	0.30103	0.30103	-0.69897	-2.69897	-2.69897	-0.69897	-2.69897	-1	-2.69897	2.50923	2.16885	0.00432137	-2.82391	-1.30103	-3	-2	-2	-4	-4.30103	-3.69897	-5.30103	-3.09691	-2	9.16667	0.235702	0.692317	0.0151232	0.9621	0.001
2.30103	-0.69897	1.47712	2.4207	1.04381	0.69897	1.38814	-0.69897	0.30103	-2.69897	-2.69897	-4.69897	-0.69897	-0.69897	-2.69897	-0.69897	-0.69897	-2.69897	0.30103	0.30103	-0.69897	-2.69897	-2.69897	-0.69897	-2.69897	-1	-2.69897	2.50923	2.16885	0.00432137	-2.82391	-1.30103	-3	-2	-2	-4	-4.30103	-3.69897	-5.30103	-3.09691	-2	8.91667	0.533594	0.740203	0.00489545	0.909878	0.0250796
2.30103	-0.69897	1.47712	2.4207	1.04381	0.69897	1.38849	-0.69897	0.30103	-2.69897	-2.69897	-1.69897	-0.69897	-0.69897	-2.69897	-0.69897	-0.69897	-2.69897	0.30103	0.30103	-0.69897	-2.69897	-2.69897	-0.69897	-2.69897	-1	-2.69897	2.50923	2.16885	0.00432137	-2.82391	-1.30103	-3	-2	-2	-4	-4.30103	-3.69897	-5.30103	-3.09691	-2	9.58333	0.533594	0.792888	0.0168225	0.924822	0.00875048
2.30103	-0.69897	1.47712	2.4207	1.04381	0.69897	1.39168	-0.69897	0.30103	-2.69897	-2.69897	-0.69897	-0.69897	-0.69897	-2.69897	-0.69897	-0.69897	-2.69897	0.30103	0.30103	-0.69897	-2.69897	-2.69897	-0.69897	-2.69897	-1	-2.69897	2.50923	2.16885	0.00432137	-2.82391	-1.30103	-3	-2	-2	-4	-4.30103	-3.69897	-5.30103	-3.09691	-2	12.5833	0.343592	0.69983	0.00743203	0.892156	0.0138489
2.30103	-0.69897	1.47712	2.4207	1.04381	0.69897	1.4223	-0.69897	0.30103	-2.69897	-2.69897	0.30103	-0.69897	-0.69897	-2.69897	-0.69897	-0.69897	-2.69897	0.30103	0.30103	-0.69897	-2.69897	-2.69897	-0.69897	-2.69897	-1	-2.69897	2.50923	2.16885	0.00432137	-2.82391	-1.30103	-3	-2	-2	-4	-4.30103	-3.69897	-5.30103	-3.09691	-2	14.25	0.946485	0.563251	0.0159208	0.867544	0.0204565
2.30103	-0.69897	1.47712	2.4207	1.04381	0.69897	1.38461	-0.69897	0.30103	-2.69897	-2.69897	-2.69897	-4.69897	-0.69897	-2.69897	-0.69897	-0.69897	-2.69897	0.30103	0.30103	-0.69897	-2.69897	-2.69897	-0.69897	-2.69897	-1	-2.69897	2.50923	2.16885	0.00432137	-2.82391	-1.30103	-3	-2	-2	-4	-4.30103	-3.69897	-5.30103	-3.09691	-2	10.3333	0.552771	0.600186	0.0125402	0.887211	0.0193052
2.30103	-0.69897	1.47712	2.4207	1.04381	0.69897	1.38464	-0.69897	0.30103	-2.69897	-2.69897	-2.69897	-2.69897	-0.69897	-2.69897	-0.69897	-0.69897	-2.69897	0.30103	0.30103	-0.69897	-2.69897	-2.69897	-0.69897	-2.69897	-1	-2.69897	2.50923	2.16885	0.00432137	-2.82391	-1.30103	-3	-2	-2	-4	-4.30103	-3.69897	-5.30103	-3.09691	-2	9.83333	0.372678	0.593842	0.00855003	0.909194	0.0173968
2.30103	-0.69897	1.47712	2.4207	1.04381	0.69897	1.38496	-0.69897	0.30103	-2.69897	-2.69897	-2.69897	-1.69897	-0.69897	-2.69897	-0.69897	-0.69897	-2.69897	0.30103	0.30103	-0.69897	-2.69897	-2.69897	-0.69897	-2.69897	-1	-2.69897	2.50923	2.16885	0.00432137	-2.82391	-1.30103	-3	-2	-2	-4	-4.30103	-3.69897	-5.30103	-3.09691	-2	9.5	0	0.593589	0.00321413	0.914711	0.0189926
2.30103	-0.69897	1.47712	2.4207	1.04381	0.69897	1.41903	-0.69897	0.30103	-2.69897	-2.69897	-2.69897	0.30103	-0.69897	-2.69897	-0.69897	-0.69897	-2.69897	0.30103	0.30103	-0.69897	-2.69897	-2.69897	-0.69897	-2.69897	-1	-2.69897	2.50923	2.16885	0.00432137	-2.82391	-1.30103	-3	-2	-2	-4	-4.30103	-3.69897	-5.30103	-3.09691	-2	9.08333	0.343592	0.734955	0.0138635	0.9331	0.00975819
2.30103	-0.69897	1.47712	2.4207	1.04381	0.69897	1.38817	-0.69897	0.30103	-2.69897	-2.69897	-2.69897	-0.69897	-4.69897	-2.69897	-0.69897	-0.69897	-2.69897	0.30103	0.30103	-0.69897	-2.69897	-2.69897	-0.69897	-2.69897	-1	-2.69897	2.50923	2.16885	0.00432137	-2.82391	-1.30103	-3	-2	-2	-4	-4.30103	-3.69897	-5.30103	-3.09691	-2	9.2	0.4	0.757769	0.00212528	0.929656	0.0493265
2.30103	-0.69897	1.47712	2.4207	1.04381	0.69897	1.38817	-0.69897	0.30103	-2.69897	-2.69897	-2.69897	-0.69897	-2.69897	-2.69897	-0.69897	-0.69897	-2.69897	0.30103	0.30103	-0.69897	-2.69897	-2.69897	-0.69897	-2.69897	-1	-2.69897	2.50923	2.16885	0.00432137	-2.82391	-1.30103	-3	-2	-2	-4	-4.30103	-3.69897	-5.30103	-3.09691	-2	9.5	0.408248	0.73039	0	0.899767	0.0200898
2.30103	-0.69897	1.47712	2.4207	1.04381	0.69897	1.38817	-0.69897	0.30103	-2.69897	-2.69897	-2.69897	-0.69897	-1.69897	-2.69897	-0.69897	-0.69897	-2.69897	0.30103	0.30103	-0.69897	-2.69897	-2.69897	-0.69897	-2.69897	-1	-2.69897	2.50923	2.16885	0.00432137	-2.82391	-1.30103	-3	-2	-2	-4	-4.30103	-3.69897	-5.30103	-3.09691	-2	9.16667	0.235702	0.739326	0.0224698	0.935711	0.037715
2.30103	-0.69897	1.47712	2.4207	1.04381	0.69897	1.38817	-0.69897	0.30103	-2.69897	-2.69897	-2.69897	-0.69897	0.30103	-2.69897	-0.69897	-0.69897	-2.69897	0.30103	0.30103	-0.69897	-2.69897	-2.69897	-0.69897	-2.69897	-1	-2.69897	2.50923	2.16885	0.00432137	-2.82391	-1.30103	-3	-2	-2	-4	-4.30103	-3.69897	-5.30103	-3.09691	-2	9.5	0.408248	0.729885	0.018215	0.9826	0.0307708
2.30103	-0.69897	1.47712	2.4207	1.04381	0.69897	1.38817	-0.69897	0.30103	-2.69897	-2.69897	-2.69897	-0.69897	-0.69897	-4.69897	-0.69897	-0.69897	-2.69897	0.30103	0.30103	-0.69897	-2.69897	-2.69897	-0.69897	-2.69897	-1	-2.69897	2.50923	2.16885	0.00432137	-2.82391	-1.30103	-3	-2	-2	-4	-4.30103	-3.69897	-5.30103	-3.09691	-2	9.5	0	0.744908	0.00702365	0.921878	0.0276738
2.30103	-0.69897	1.47712	2.4207	1.04381	0.69897	1.38817	-0.69897	0.30103	-2.69897	-2.69897	-2.69897	-0.69897	-0.69897	-1.69897	-0.69897	-0.69897	-2.69897	0.30103	0.30103	-0.69897	-2.69897	-2.69897	-0.69897	-2.69897	-1	-2.69897	2.50923	2.16885	0.00432137	-2.82391	-1.30103	-3	-2	-2	-4	-4.30103	-3.69897	-5.30103	-3.09691	-2	7.91667	0.343592	0.722597	0.0132696	0.9533	0.0103249
2.30103	-0.69897	1.47712	2.4207	1.04381	0.69897	1.38817	-0.69897	0.30103	-2.69897	-2.69897	-2.69897	-0.69897	-0.69897	-0.69897	-0.69897	-0.69897	-2.69897	0.30103	0.30103	-0.69897	-2.69897	-2.69897	-0.69897	-2.69897	-1	-2.69897	2.50923	2.16885	0.00432137	-2.82391	-1.30103	-3	-2	-2	-4	-4.30103	-3.69897	-5.30103	-3.09691	-2	9.16667	0.372678	0.723963	0.0200966	0.958267	0.0250124
2.30103	-0.69897	1.47712	2.4207	1.04381	0.69897	1.38817	-0.69897	0.30103	-2.69897	-2.69897	-2.69897	-0.69897	-0.69897	0.30103	-0.69897	-0.69897	-2.69897	0.30103	0.30103	-0.69897	-2.69897	-2.69897	-0.69897	-2.69897	-1	-2.69897	2.50923	2.16885	0.00432137	-2.82391	-1.30103	-3	-2	-2	-4	-4.30103	-3.69897	-5.30103	-3.09691	-2	9.58333	0.533594	0.704383	0.0251625	0.911933	0.0339077
2.30103	-0.69897	1.47712	2.4207	1.04381	0.69897	1.38461	-0.69897	0.30103	-2.69897	-2.69897	-2.69897	-0.69897	-0.69897	-2.69897	-4.69897	-0.69897	-2.69897	0.30103	0.30103	-0.69897	-2.69897	-2.69897	-0.69897	-2.69897	-1	-2.69897	2.50923	2.16885	0.00432137	-2.82391	-1.30103	-3	-2	-2	-4	-4.30103	-3.69897	-5.30103	-3.09691	-2	9.16667	0.372678	0.745734	0.0215929	0.9157	0.010882
2.30103	-0.69897	1.47712	2.4207	1.04381	0.69897	1.38464	-0.69897	0.30103	-2.69897	-2.69897	-2.69897	-0.69897	-0.69897	-2.69897	-2.69897	-0.69897	-2.69897	0.30103	0.30103	-0.69897	-2.69897	-2.69897	-0.69897	-2.69897	-1	-2.69897	2.50923	2.16885	0.00432137	-2.82391	-1.30103	-3	-2	-2	-4	-4.30103	-3.69897	-5.30103	-3.09691	-2	9.33333	0.235702	0.739786	0.0217955	0.914822	0.0199828
2.30103	-0.69897	1.47712	2.4207	1.04381	0.69897	1.38496	-0.69897	0.30103	-2.69897	-2.69897	-2.69897	-0.69897	-0.69897	-2.69897	-1.69897	-0.69897	-2.69897	0.30103	0.30103	-0.69897	-2.69897	-2.69897	-0.69897	-2.69897	-1	-2.69897	2.50923	2.16885	0.00432137	-2.82391	-1.30103	-3	-2	-2	-4	-4.30103	-3.69897	-5.30103	-3.09691	-2	9.25	0.25	0.737834	0.0242002	0.936378	0.0215539
2.30103	-0.69897	1.47712	2.4207	1.04381	0.69897	1.41903	-0.69897	0.30103	-2.69897	-2.69897	-2.69897	-0.69897	-0.69897	-2.69897	0.30103	-0.69897	-2.69897	0.30103	0.30103	-0.69897	-2.69897	-2.69897	-0.69897	-2.69897	-1	-2.69897	2.50923	2.16885	0.00432137	-2.82391	-1.30103	-3	-2	-2	-4	-4.30103	-3.69897	-5.30103	-3.09691	-2	8.16667	0.235702	0.728447	0.0248752	0.925211	0.021437
2.30103	-0.69897	1.47712	2.4207	1.04381	0.69897	1.38817	-0.69897	0.30103	-2.69897	-2.69897	-2.69897	-0.69897	-0.69897	-2.69897	-0.69897	-4.69897	-2.69897	0.30103	0.30103	-0.69897	-2.69897	-2.69897	-0.69897	-2.69897	-1	-2.69897	2.50923	2.16885	0.00432137	-2.82391	-1.30103	-3	-2	-2	-4	-4.30103	-3.69897	-5.30103	-3.09691	-2	9.25	0.25	0.736483	0.0156688	0.918656	0.016956
2.30103	-0.69897	1.47712	2.4207	1.04381	0.69897	1.38817	-0.69897	0.30103	-2.69897	-2.69897	-2.69897	-0.69897	-0.69897	-2.69897	-0.69897	-2.69897	-2.69897	0.30103	0.30103	-0.69897	-2.69897	-2.69897	-0.69897	-2.69897	-1	-2.69897	2.50923	2.16885	0.00432137	-2.82391	-1.30103	-3	-2	-2	-4	-4.30103	-3.69897	-5.30103	-3.09691	-2	9.5	0	0.739997	0.0165735	0.9296	0.0188559
2.30103	-0.69897	1.47712	2.4207	1.04381	0.69897	1.38817	-0.69897	0.30103	-2.69897	-2.69897	-2.69897	-0.69897	-0.69897	-2.69897	-0.69897	-1.69897	-2.69897	0.30103	0.30103	-0.69897	-2.69897	-2.69897	-0.69897	-2.69897	-1	-2.69897	2.50923	2.16885	0.00432137	-2.82391	-1.30103	-3	-2	-2	-4	-4.30103	-3.69897	-5.30103	-3.09691	-2	8.91667	0.448764	0.738571	0.0159295	0.942933	0.0170019
2.30103	-0.69897	1.47712	2.4207	1.04381	0.69897	1.38817	-0.69897	0.30103	-2.69897	-2.69897	-2.69897	-0.69897	-0.69897	-2.69897	-0.69897	0.30103	-2.69897	0.30103	0.30103	-0.69897	-2.69897	-2.69897	-0.69897	-2.69897	-1	-2.69897	2.50923	2.16885	0.00432137	-2.82391	-1.30103	-3	-2	-2	-4	-4.30103	-3.69897	-5.30103	-3.09691	-2	9.16667	0.235702	0.732678	0.0166459	1.25543	0.0188483
2.30103	-0.69897	1.47712	2.4207	1.04381	0.69897	1.38817	-0.69897	0.30103	-2.69897	-2.69897	-2.69897	-0.69897	-0.69897	-2.69897	-0.69897	-0.69897	-4.69897	0.30103	0.30103	-0.69897	-2.69897	-2.69897	-0.69897	-2.69897	-1	-2.69897	2.50923	2.16885	0.00432137	-2.82391	-1.30103	-3	-2	-2	-4	-4.30103	-3.69897	-5.30103	-3.09691	-2	9.16667	0.235702	0.7399	0.000296883	0.924433	0
2.30103	-0.69897	1.47712	2.4207	1.04381	0.69897	1.38817	-0.69897	0.30103	-2.69897	-2.69897	-2.69897	-0.69897	-0.69897	-2.69897	-0.69897	-0.69897	-1.69897	0.30103	0.30103	-0.69897	-2.69897	-2.69897	-0.69897	-2.69897	-1	-2.69897	2.50923	2.16885	0.00432137	-2.82391	-1.30103	-3	-2	-2	-4	-4.30103	-3.69897	-5.30103	-3.09691	-2	8.66667	0.372678	0.752649	0.0263629	0.938217	0.00378333
2.30103	-0.69897	1.47712	2.4207	1.04381	0.69897	1.38817	-0.69897	0.30103	-2.69897	-2.69897	-2.69897	-0.69897	-0.69897	-2.69897	-0.69897	-0.69897	-0.69897	0.30103	0.30103	-0.69897	-2.69897	-2.69897	-0.69897	-2.69897	-1	-2.69897	2.50923	2.16885	0.00432137	-2.82391	-1.30103	-3	-2	-2	-4	-4.30103	-3.69897	-5.30103	-3.09691	-2	8.33333	0.372678	0.755436	0.0180127	0.8941	0.0243333
2.30103	-0.69897	1.47712	2.4207	1.04381	0.69897	1.38817	-0.69897	0.30103	-2.69897	-2.69897	-2.69897	-0.69897	-0.69897	-2.69897	-0.69897	-0.69897	0.30103	0.30103	0.30103	-0.69897	-2.69897	-2.69897	-0.69897	-2.69897	-1	-2.69897	2.50923	2.16885	0.00432137	-2.82391	-1.30103	-3	-2	-2	-4	-4.30103	-3.69897	-5.30103	-3.09691	-2	8.5	0.288675	0.74779	0.0236424	0.878767	0.00233333
2.30103	-0.69897	1.47712	2.4207	1.04381	0.69897	1.3511	-0.69897	0.30103	-2.69897	-2.69897	-2.69897	-0.69897	-0.69897	-2.69897	-0.69897	-0.69897	-2.69897	-4.69897	0.30103	-0.69897	-2.69897	-2.69897	-0.69897	-2.69897	-1	-2.69897	2.50923	2.16885	0.00432137	-2.82391	-1.30103	-3	-2	-2	-4	-4.30103	-3.69897	-5.30103	-3.09691	-2	10.25	0.381881	0.716005	0.0157134
2.30103	-0.69897	1.47712	2.4207	1.04381	0.69897	1.35114	-0.69897	0.30103	-2.69897	-2.69897	-2.69897	-0.69897	-0.69897	-2.69897	-0.69897	-0.69897	-2.69897	-2.69897	0.30103	-0.69897	-2.69897	-2.69897	-0.69897	-2.69897	-1	-2.69897	2.50923	2.16885	0.00432137	-2.82391	-1.30103	-3	-2	-2	-4	-4.30103	-3.69897	-5.30103	-3.09691	-2	9.33333	0.235702	0.702073	0.0250057
2.30103	-0.69897	1.47712	2.4207	1.04381	0.69897	1.35149	-0.69897	0.30103	-2.69897	-2.69897	-2.69897	-0.69897	-0.69897	-2.69897	-0.69897	-0.69897	-2.69897	-1.69897	0.30103	-0.69897	-2.69897	-2.69897	-0.69897	-2.69897	-1	-2.69897	2.50923	2.16885	0.00432137	-2.82391	-1.30103	-3	-2	-2	-4	-4.30103	-3.69897	-5.30103	-3.09691	-2	9.58333	0.533594	0.764976	0.0211242
2.30103	-0.69897	1.47712	2.4207	1.04381	0.69897	1.35496	-0.69897	0.30103	-2.69897	-2.69897	-2.69897	-0.69897	-0.69897	-2.69897	-0.69897	-0.69897	-2.69897	-0.69897	0.30103	-0.69897	-2.69897	-2.69897	-0.69897	-2.69897	-1	-2.69897	2.50923	2.16885	0.00432137	-2.82391	-1.30103	-3	-2	-2	-4	-4.30103	-3.69897	-5.30103	-3.09691	-2	9.3	0.244949	0.746291	0.0165032
2.30103	-0.69897	1.47712	2.4207	1.04381	0.69897	1.38817	-0.69897	0.30103	-2.69897	-2.69897	-2.69897	-0.69897	-0.69897	-2.69897	-0.69897	-0.69897	-2.69897	0.30103	-4.69897	-0.69897	-2.69897	-2.69897	-0.69897	-2.69897	-1	-2.69897	2.50923	2.16885	0.00432137	-2.82391	-1.30103	-3	-2	-2	-4	-4.30103	-3.69897	-5.30103	-3.09691	-2	10.6667	0.235702	0.641359	0.00579466	0.998544	0.0136486
2.30103	-0.69897	1.47712	2.4207	1.04381	0.69897	1.38817	-0.69897	0.30103	-2.69897	-2.69897	-2.69897	-0.69897	-0.69897	-2.69897	-0.69897	-0.69897	-2.69897	0.30103	-2.69897	-0.69897	-2.69897	-2.69897	-0.69897	-2.69897	-1	-2.69897	2.50923	2.16885	0.00432137	-2.82391	-1.30103	-3	-2	-2	-4	-4.30103	-3.69897	-5.30103	-3.09691	-2	9.41667	0.343592	0.61947	0.00406972	0.9769	0.00548371
2.30103	-0.69897	1.47712	2.4207	1.04381	0.69897	1.38817	-0.69897	0.30103	-2.69897	-2.69897	-2.69897	-0.69897	-0.69897	-2.69897	-0.69897	-0.69897	-2.69897	0.30103	-1.69897	-0.69897	-2.69897	-2.69897	-0.69897	-2.69897	-1	-2.69897	2.50923	2.16885	0.00432137	-2.82391	-1.30103	-3	-2	-2	-4	-4.30103	-3.69897	-5.30103	-3.09691	-2	9	0	0.766523	0.0253746	1.06282	0.00930037
2.30103	-0.69897	1.47712	2.4207	1.04381	0.69897	1.38817	-0.69897	0.30103	-2.69897	-2.69897	-2.69897	-0.69897	-0.69897	-2.69897	-0.69897	-0.69897	-2.69897	0.30103	-0.69897	-0.69897	-2.69897	-2.69897	-0.69897	-2.69897	-1	-2.69897	2.50923	2.16885	0.00432137	-2.82391	-1.30103	-3	-2	-2	-4	-4.30103	-3.69897	-5.30103	-3.09691	-2	8.75	0.381881	0.757563	0.0113466	0.919489	0.0258732
2.30103	-0.69897	1.47712	2.4207	1.04381	0.69897	1.38817	-0.69897	0.30103	-2.69897	-2.69897	-2.69897	-0.69897	-0.69897	-2.69897	-0.69897	-0.69897	-2.69897	0.30103	0.30103	-4.69897	-2.69897	-2.69897	-0.69897	-2.69897	-1	-2.69897	2.50923	2.16885	0.00432137	-2.82391	-1.30103	-3	-2	-2	-4	-4.30103	-3.69897	-5.30103	-3.09691	-2	9	0	0.780458	0.0208025	0.924544	0.00817554
2.30103	-0.69897	1.47712	2.4207	1.04381	0.69897	1.38817	-0.69897	0.30103	-2.69897	-2.69897	-2.69897	-0.69897	-0.69897	-2.69897	-0.69897	-0.69897	-2.69897	0.30103	0.30103	-2.69897	-2.69897	-2.69897	-0.69897	-2.69897	-1	-2.69897	2.50923	2.16885	0.00432137	-2.82391	-1.30103	-3	-2	-2	-4	-4.30103	-3.69897	-5.30103	-3.09691	-2	9	0	0.787428	0.0154855	0.936933	0.00759325
2.30103	-0.69897	1.47712	2.4207	1.04381	0.69897	1.38817	-0.69897	0.30103	-2.69897	-2.69897	-2.69897	-0.69897	-0.69897	-2.69897	-0.69897	-0.69897	-2.69897	0.30103	0.30103	-1.69897	-2.69897	-2.69897	-0.69897	-2.69897	-1	-2.69897	2.50923	2.16885	0.00432137	-2.82391	-1.30103	-3	-2	-2	-4	-4.30103	-3.69897	-5.30103	-3.09691	-2	9.16667	0.235702	0.793421	0.00992912	0.941822	0.0124178
2.30103	-0.69897	1.47712	2.4207	1.04381	0.69897	1.38817	-0.69897	0.30103	-2.69897	-2.69897	-2.69897	-0.69897	-0.69897	-2.69897	-0.69897	-0.69897	-2.69897	0.30103	0.30103	0.30103	-2.69897	-2.69897	-0.69897	-2.69897	-1	-2.69897	2.50923	2.16885	0.00432137	-2.82391	-1.30103	-3	-2	-2	-4	-4.30103	-3.69897	-5.30103	-3.09691	-2	9	0	0.704612	0.0115533	0.912933	0.0250945
2.30103	-0.69897	1.47712	2.4207	1.04381	0.69897	1.38817	-0.69897	0.30103	-2.69897	-2.69897	-2.69897	-0.69897	-0.69897	-2.69897	-0.69897	-0.69897	-2.69897	0.30103	0.30103	-0.69897	-4.69897	-2.69897	-0.69897	-2.69897	-1	-2.69897	2.50923	2.16885	0.00432137	-2.82391	-1.30103	-3	-2	-2	-4	-4.30103	-3.69897	-5.30103	-3.09691	-2	8.91667	0.343592	0.75688	0.0238654	0.897933	0.0213695
2.30103	-0.69897	1.47712	2.4207	1.04381	0.69897	1.38817	-0.69897	0.30103	-2.69897	-2.69897	-2.69897	-0.69897	-0.69897	-2.69897	-0.69897	-0.69897	-2.69897	0.30103	0.30103	-0.69897	-1.69897	-2.69897	-0.69897	-2.69897	-1	-2.69897	2.50923	2.16885	0.00432137	-2.82391	-1.30103	-3	-2	-2	-4	-4.30103	-3.69897	-5.30103	-3.09691	-2	9.25	0.478714	0.74307	0.000366243	0.922017	0.00304936
2.30103	-0.69897	1.47712	2.4207	1.04381	0.69897	1.38817	-0.69897	0.30103	-2.69897	-2.69897	-2.69897	-0.69897	-0.69897	-2.69897	-0.69897	-0.69897	-2.69897	0.30103	0.30103	-0.69897	-0.69897	-2.69897	-0.69897	-2.69897	-1	-2.69897	2.50923	2.16885	0.00432137	-2.82391	-1.30103	-3	-2	-2	-4	-4.30103	-3.69897	-5.30103	-3.09691	-2	10	0	0.839474	0.00785162	0.929044	0.00568108
2.30103	-0.69897	1.47712	2.4207	1.04381	0.69897	1.38817	-0.69897	0.30103	-2.69897	-2.69897	-2.69897	-0.69897	-0.69897	-2.69897	-0.69897	-0.69897	-2.69897	0.30103	0.30103	-0.69897	0.30103	-2.69897	-0.69897	-2.69897	-1	-2.69897	2.50923	2.16885	0.00432137	-2.82391	-1.30103	-3	-2	-2	-4	-4.30103	-3.69897	-5.30103	-3.09691	-2	10.75	0.381881	0.853068	0.0174112	1.20827	0.027168
2.30103	-0.69897	1.47712	2.4207	1.04381	0.69897	1.38817	-0.69897	0.30103	-2.69897	-2.69897	-2.69897	-0.69897	-0.69897	-2.69897	-0.69897	-0.69897	-2.69897	0.30103	0.30103	-0.69897	-2.69897	-4.69897	-0.69897	-2.69897	-1	-2.69897	2.50923	2.16885	0.00432137	-2.82391	-1.30103	-3	-2	-2	-4	-4.30103	-3.69897	-5.30103	-3.09691	-2	9.25	0.25	0.766774	0.00946056	0.902322	0.017333
2.30103	-0.69897	1.47712	2.4207	1.04381	0.69897	1.38817	-0.69897	0.30103	-2.69897	-2.69897	-2.69897	-0.69897	-0.69897	-2.69897	-0.69897	-0.69897	-2.69897	0.30103	0.30103	-0.69897	-2.69897	-1.69897	-0.69897	-2.69897	-1	-2.69897	2.50923	2.16885	0.00432137	-2.82391	-1.30103	-3	-2	-2	-4	-4.30103	-3.69897	-5.30103	-3.09691	-2	8.83333	0.235702	0.755547	0.0101882	0.926267	0.011416
2.30103	-0.69897	1.47712	2.4207	1.04381	0.69897	1.38817	-0.69897	0.30103	-2.69897	-2.69897	-2.69897	-0.69897	-0.69897	-2.69897	-0.69897	-0.69897	-2.69897	0.30103	0.30103	-0.69897	-2.69897	-0.69897	-0.69897	-2.69897	-1	-2.69897	2.50923	2.16885	0.00432137	-2.82391	-1.30103	-3	-2	-2	-4	-4.30103	-3.69897	-5.30103	-3.09691	-2	8.75	0.381881	0.740214	0.0277554	0.944378	0.0126833
2.30103	-0.69897	1.47712	2.4207	1.04381	0.69897	1.38817	-0.69897	0.30103	-2.69897	-2.69897	-2.69897	-0.69897	-0.69897	-2.69897	-0.69897	-0.69897	-2.69897	0.30103	0.30103	-0.69897	-2.69897	0.30103	-0.69897	-2.69897	-1	-2.69897	2.50923	2.16885	0.00432137	-2.82391	-1.30103	-3	-2	-2	-4	-4.30103	-3.69897	-5.30103	-3.09691	-2	8.83333	0.235702	0.833247	0.0162469	0.928767	0.0137383
2.30103	-0.69897	1.47712	2.4207	1.04381	0.69897	1.38817	-0.69897	0.30103	-2.69897	-2.69897	-2.69897	-0.69897	-0.69897	-2.69897	-0.69897	-0.69897	-2.69897	0.30103	0.30103	-0.69897	-2.69897	-2.69897	-4.69897	-2.69897	-1	-2.69897	2.50923	2.16885	0.00432137	-2.82391	-1.30103	-3	-2	-2	-4	-4.30103	-3.69897	-5.30103	-3.09691	-2	9.75	0.25	0.706097	0.0146982	0.907156	0.0122587
2.30103	-0.69897	1.47712	2.4207	1.04381	0.69897	1.38817	-0.69897	0.30103	-2.69897	-2.69897	-2.69897	-0.69897	-0.69897	-2.69897	-0.69897	-0.69897	-2.69897	0.30103	0.30103	-0.69897	-2.69897	-2.69897	-2.69897	-2.69897	-1	-2.69897	2.50923	2.16885	0.00432137	-2.82391	-1.30103	-3	-2	-2	-4	-4.30103	-3.69897	-5.30103	-3.09691	-2	9.16667	0.372678	0.723996	0.0200075	0.913933	0.0127145
2.30103	-0.69897	1.47712	2.4207	1.04381	0.69897	1.38817	-0.69897	0.30103	-2.69897	-2.69897	-2.69897	-0.69897	-0.69897	-2.69897	-0.69897	-0.69897	-2.69897	0.30103	0.30103	-0.69897	-2.69897	-2.69897	-1.69897	-2.69897	-1	-2.69897	2.50923	2.16885	0.00432137	-2.82391	-1.30103	-3	-2	-2	-4	-4.30103	-3.69897	-5.30103	-3.09691	-2	9	0	0.734951	0.0108131	0.908989	0.0163556
2.30103	-0.69897	1.47712	2.4207	1.04381	0.69897	1.38817	-0.69897	0.30103	-2.69897	-2.69897	-2.69897	-0.69897	-0.69897	-2.69897	-0.69897	-0.69897	-2.69897	0.30103	0.30103	-0.69897	-2.69897	-2.69897	0.30103	-2.69897	-1	-2.69897	2.50923	2.16885	0.00432137	-2.82391	-1.30103	-3	-2	-2	-4	-4.30103	-3.69897	-5.30103	-3.09691	-2	9.41667	0.448764	0.698557	0	0.969989	0.031313
2.30103	-0.69897	1.47712	2.4207	1.04381	0.69897	1.38817	-0.69897	0.30103	-2.69897	-2.69897	-2.69897	-0.69897	-0.69897	-2.69897	-0.69897	-0.69897	-2.69897	0.30103	0.30103	-0.69897	-2.69897	-2.69897	-0.69897	-4.69897	-1	-2.69897	2.50923	2.16885	0.00432137	-2.82391	-1.30103	-3	-2	-2	-4	-4.30103	-3.69897	-5.30103	-3.09691	-2	9.75	0.25	0.75267	0.023907	0.918767	0.0120123
2.30103	-0.69897	1.47712	2.4207	1.04381	0.69897	1.38817	-0.69897	0.30103	-2.69897	-2.69897	-2.69897	-0.69897	-0.69897	-2.69897	-0.69897	-0.69897	-2.69897	0.30103	0.30103	-0.69897	-2.69897	-2.69897	-0.69897	-1.69897	-1	-2.69897	2.50923	2.16885	0.00432137	-2.82391	-1.30103	-3	-2	-2	-4	-4.30103	-3.69897	-5.30103	-3.09691	-2	9.08333	0.343592	0.779784	0.0073312	0.947489	0.0113813
2.30103	-0.69897	1.47712	2.4207	1.04381	0.69897	1.38817	-0.69897	0.30103	-2.69897	-2.69897	-2.69897	-0.69897	-0.69897	-2.69897	-0.69897	-0.69897	-2.69897	0.30103	0.30103	-0.69897	-2.69897	-2.69897	-0.69897	-0.69897	-1	-2.69897	2.50923	2.16885	0.00432137	-2.82391	-1.30103	-3	-2	-2	-4	-4.30103	-3.69897	-5.30103	-3.09691	-2	9	0	0.793875	0.0173828	0.958211	0.0124732
2.30103	-0.69897	1.47712	2.4207	1.04381	0.69897	1.38817	-0.69897	0.30103	-2.69897	-2.69897	-2.69897	-0.69897	-0.69897	-2.69897	-0.69897	-0.69897	-2.69897	0.30103	0.30103	-0.69897	-2.69897	-2.69897	-0.69897	0.30103	-1	-2.69897	2.50923	2.16885	0.00432137	-2.82391	-1.30103	-3	-2	-2	-4	-4.30103	-3.69897	-5.30103	-3.09691	-2	9	0	0.748488	0.0118441	0.976933	0.020679
2.30103	-0.69897	1.47712	2.4207	1.04381	0.69897	1.38817	-0.69897	0.30103	-2.69897	-2.69897	-2.69897	-0.69897	-0.69897	-2.69897	-0.69897	-0.69897	-2.69897	0.30103	0.30103	-0.69897	-2.69897	-2.69897	-0.69897	-2.69897	-5	-2.69897	2.50923	2.16885	0.00432137	-2.82391	-1.30103	-3	-2	-2	-4	-4.30103	-3.69897	-5.30103	-3.09691	-2	9	0	0.734265	0.0069451	0.894544	0.0206968
2.30103	-0.69897	1.47712	2.4207	1.04381	0.69897	1.38817	-0.69897	0.30103	-2.69897	-2.69897	-2.69897	-0.69897	-0.69897	-2.69897	-0.69897	-0.69897	-2.69897	0.30103	0.30103	-0.69897	-2.69897	-2.69897	-0.69897	-2.69897	-3	-2.69897	2.50923	2.16885	0.00432137	-2.82391	-1.30103	-3	-2	-2	-4	-4.30103	-3.69897	-5.30103	-3.09691	-2	9.16667	0.372678	0.732886	0.0169394	0.906156	0.01771
2.30103	-0.69897	1.47712	2.4207	1.04381	0.69897	1.38817	-0.69897	0.30103	-2.69897	-2.69897	-2.69897	-0.69897	-0.69897	-2.69897	-0.69897	-0.69897	-2.69897	0.30103	0.30103	-0.69897	-2.69897	-2.69897	-0.69897	-2.69897	-2	-2.69897	2.50923	2.16885	0.00432137	-2.82391	-1.30103	-3	-2	-2	-4	-4.30103	-3.69897	-5.30103	-3.09691	-2	8.91667	0.343592	0.743492	0.0192424	0.914656	0.0169778
2.30103	-0.69897	1.47712	2.4207	1.04381	0.69897	1.38817	-0.69897	0.30103	-2.69897	-2.69897	-2.69897	-0.69897	-0.69897	-2.69897	-0.69897	-0.69897	-2.69897	0.30103	0.30103	-0.69897	-2.69897	-2.69897	-0.69897	-2.69897	-0.0942041	-2.69897	2.50923	2.16885	0.00432137	-2.82391	-1.30103	-3	-2	-2	-4	-4.30103	-3.69897	-5.30103	-3.09691	-2	8.66667	0.235702	0.742096	0.0263515	0.928767	0.0233032
2.30103	-0.69897	1.47712	2.4207	1.04381	0.69897	1.38817	-0.69897	0.30103	-2.69897	-2.69897	-2.69897	-0.69897	-0.69897	-2.69897	-0.69897	-0.69897	-2.69897	0.30103	0.30103	-0.69897	-2.69897	-2.69897	-0.69897	-2.69897	-1	-4.69897	2.50923	2.16885	0.00432137	-2.82391	-1.30103	-3	-2	-2	-4	-4.30103	-3.69897	-5.30103	-3.09691	-2	8.83333	0.372678	0.754715	0.0130369	0.9101	0.0190195
2.30103	-0.69897	1.47712	2.4207	1.04381	0.69897	1.38817	-0.69897	0.30103	-2.69897	-2.69897	-2.69897	-0.69897	-0.69897	-2.69897	-0.69897	-0.69897	-2.69897	0.30103	0.30103	-0.69897	-2.69897	-2.69897	-0.69897	-2.69897	-1	-1.69897	2.50923	2.16885	0.00432137	-2.82391	-1.30103	-3	-2	-2	-4	-4.30103	-3.69897	-5.30103	-3.09691	-2	8.58333	0.343592	0.765697	0.0168389	0.924267	0.0147243
2.30103	-0.69897	1.47712	2.4207	1.04381	0.69897	1.38817	-0.69897	0.30103	-2.69897	-2.69897	-2.69897	-0.69897	-0.69897	-2.69897	-0.69897	-0.69897	-2.69897	0.30103	0.30103	-0.69897	-2.69897	-2.69897	-0.69897	-2.69897	-1	-0.69897	2.50923	2.16885	0.00432137	-2.82391	-1.30103	-3	-2	-2	-4	-4.30103	-3.69897	-5.30103	-3.09691	-2	9.25	0.25	0.712363	0.0154462	0.915489	0.0144433
2.30103	-0.69897	1.47712	2.4207	1.04381	0.69897	1.38817	-0.69897	0.30103	-2.69897	-2.69897	-2.69897	-0.69897	-0.69897	-2.69897	-0.69897	-0.69897	-2.69897	0.30103	0.30103	-0.69897	-2.69897	-2.69897	-0.69897	-2.69897	-1	0.30103	2.50923	2.16885	0.00432137	-2.82391	-1.30103	-3	-2	-2	-4	-4.30103	-3.69897	-5.30103	-3.09691	-2	8.5	0	0.751056	0.023206	0.842044	0.00796617
2.30103	-0.69897	1.47712	2.4207	1.04381	0.69897	1.38782	-0.69897	0.30103	-2.69897	-2.69897	-2.69897	-0.69897	-0.69897	-2.69897	-0.69897	-0.69897	-2.69897	0.30103	0.30103	-0.69897	-2.69897	-2.69897	-0.69897	-2.69897	-1	-2.69897	2.5092	2.16885	0.00432137	-2.82391	-1.30103	-3	-2	-2	-4	-4.30103	-3.69897	-5.30103	-3.09691	-2	8.91667	0.448764	0.744973	0.0160566	0.910433	0.0111803
2.30103	-0.69897	1.47712	2.4207	1.04381	0.69897	1.39136	-0.69897	0.30103	-2.69897	-2.69897	-2.69897	-0.69897	-0.69897	-2.69897	-0.69897	-0.69897	-2.69897	0.30103	0.30103	-0.69897	-2.69897	-2.69897	-0.69897	-2.69897	-1	-2.69897	2.50947	2.16885	0.00432137	-2.82391	-1.30103	-3	-2	-2	-4	-4.30103	-3.69897	-5.30103	-3.09691	-2	8.75	0.25	0.749249	0.00631897	0.910044	0.0208108
2.30103	-0.69897	1.47712	2.4207	1.04381	0.69897	1.422	-0.69897	0.30103	-2.69897	-2.69897	-2.69897	-0.69897	-0.69897	-2.69897	-0.69897	-0.69897	-2.69897	0.30103	0.30103	-0.69897	-2.69897	-2.69897	-0.69897	-2.69897	-1	-2.69897	2.51188	2.16885	0.00432137	-2.82391	-1.30103	-3	-2	-2	-4	-4.30103	-3.69897	-5.30103	-3.09691	-2	8.91667	0.343592	0.724759	0.0139881	0.927989	0.0155916
2.30103	-0.69897	1.47712	2.4207	1.04381	0.69897	1.64762	-0.69897	0.30103	-2.69897	-2.69897	-2.69897	-0.69897	-0.69897	-2.69897	-0.69897	-0.69897	-2.69897	0.30103	0.30103	-0.69897	-2.69897	-2.69897	-0.69897	-2.69897	-1	-2.69897	2.53529	2.16885	0.00432137	-2.82391	-1.30103	-3	-2	-2	-4	-4.30103	-3.69897	-5.30103	-3.09691	-2	8.83333	0.372678	0.712005	0.0164585	0.9216	0.0215224
2.30103	-0.69897	1.47712	2.4207	1.04381	0.69897	1.15969	-0.69897	0.30103	-2.69897	-2.69897	-2.69897	-0.69897	-0.69897	-2.69897	-0.69897	-0.69897	-2.69897	0.30103	0.30103	-0.69897	-2.69897	-2.69897	-0.69897	-2.69897	-1	-2.69897	2.50923	2.13837	0.00432137	-2.82391	-1.30103	-3	-2	-2	-4	-4.30103	-3.69897	-5.30103	-3.09691	-2	8.66667	0.372678	0.769031	0.0150089	0.916711	0.0157661
2.30103	-0.69897	1.47712	2.4207	1.04381	0.69897	1.15999	-0.69897	0.30103	-2.69897	-2.69897	-2.69897	-0.69897	-0.69897	-2.69897	-0.69897	-0.69897	-2.69897	0.30103	0.30103	-0.69897	-2.69897	-2.69897	-0.69897	-2.69897	-1	-2.69897	2.50923	2.1384	0.00432137	-2.82391	-1.30103	-3	-2	-2	-4	-4.30103	-3.69897	-5.30103	-3.09691	-2	8.58333	0.343592	0.770857	0.0210484	0.928933	0.0170639
2.30103	-0.69897	1.47712	2.4207	1.04381	0.69897	1.16269	-0.69897	0.30103	-2.69897	-2.69897	-2.69897	-0.69897	-0.69897	-2.69897	-0.69897	-0.69897	-2.69897	0.30103	0.30103	-0.69897	-2.69897	-2.69897	-0.69897	-2.69897	-1	-2.69897	2.50923	2.13868	0.00432137	-2.82391	-1.30103	-3	-2	-2	-4	-4.30103	-3.69897	-5.30103	-3.09691	-2	8.83333	0.235702	0.734274	0.0135048	0.933656	0.0265795
2.30103	-0.69897	1.47712	2.4207	1.04381	0.69897	1.18876	-0.69897	0.30103	-2.69897	-2.69897	-2.69897	-0.69897	-0.69897	-2.69897	-0.69897	-0.69897	-2.69897	0.30103	0.30103	-0.69897	-2.69897	-2.69897	-0.69897	-2.69897	-1	-2.69897	2.50923	2.14151	0.00432137	-2.82391	-1.30103	-3	-2	-2	-4	-4.30103	-3.69897	-5.30103	-3.09691	-2	8.66667	0.372678	0.775462	0.017984	0.935322	0.0162693
2.30103	-0.69897	1.47712	2.4207	1.00267	0.69897	1.38817	-0.69897	0.30103	-2.69897	-2.69897	-2.69897	-0.69897	-0.69897	-2.69897	-0.69897	-0.69897	-2.69897	0.30103	0.30103	-0.69897	-2.69897	-2.69897	-0.69897	-2.69897	-1	-2.69897	2.50923	2.16885	-1.9914	-2.82391	-1.30103	-3	-2	-2	-4	-4.30103	-3.69897	-5.30103	-3.09691	-2	9.66667	0.235702	0.756112	0.0291178	0.213489	0.00275154
2.30103	-0.69897	1.47712	2.4207	1.00309	0.69897	1.38817	-0.69897	0.30103	-2.69897	-2.69897	-2.69897	-0.69897	-0.69897	-2.69897	-0.69897	-0.69897	-2.69897	0.30103	0.30103	-0.69897	-2.69897	-2.69897	-0.69897	-2.69897	-1	-2.69897	2.50923	2.16885	-1.69897	-2.82391	-1.30103	-3	-2	-2	-4	-4.30103	-3.69897	-5.30103	-3.09691	-2	9.66667	0.471405	0.753889	0.0247626	0.407878	0.00574671
2.30103	-0.69897	1.47712	2.4207	1.00696	0.69897	1.38817	-0.69897	0.30103	-2.69897	-2.69897	-2.69897	-0.69897	-0.69897	-2.69897	-0.69897	-0.69897	-2.69897	0.30103	0.30103	-0.69897	-2.69897	-2.69897	-0.69897	-2.69897	-1	-2.69897	2.50923	2.16885	-0.958607	-2.82391	-1.30103	-3	-2	-2	-4	-4.30103	-3.69897	-5.30103	-3.09691	-2	9	0.408248	0.766478	1.11022e-16	0.745267	0.00548652
2.30103	-0.69897	1.47712	2.4207	1.30236	0.69897	1.38817	-0.69897	0.30103	-2.69897	-2.69897	-2.69897	-0.69897	-0.69897	-2.69897	-0.69897	-0.69897	-2.69897	0.30103	0.30103	-0.69897	-2.69897	-2.69897	-0.69897	-2.69897	-1	-2.69897	2.50923	2.16885	1.00043	-2.82391	-1.30103	-3	-2	-2	-4	-4.30103	-3.69897	-5.30103	-3.09691	-2	8.5	0.57735	0.786417	0.0218431	0.896583	0.027932
2.30103	-0.69897	1.47712	2.4207	1.04381	0.69897	1.38782	-0.69897	0.30103	-2.69897	-2.69897	-2.69897	-0.69897	-0.69897	-2.69897	-0.69897	-0.69897	-2.69897	0.30103	0.30103	-0.69897	-2.69897	-2.69897	-0.69897	-2.69897	-1	-2.69897	2.50923	2.16885	0	-2.82391	-1.30103	-3	-2	-2	-4	-4.30103	-3.69897	-5.30103	-3.09691	-2	9	0.408248	0.757877	0.0109584	0.908211	0.0238767
2.30103	-0.69897	1.47712	2.4207	1.04381	0.69897	1.39136	-0.69897	0.30103	-2.69897	-2.69897	-2.69897	-0.69897	-0.69897	-2.69897	-0.69897	-0.69897	-2.69897	0.30103	0.30103	-0.69897	-2.69897	-2.69897	-0.69897	-2.69897	-1	-2.69897	2.50923	2.16885	0.0413927	-2.82391	-1.30103	-3	-2	-2	-4	-4.30103	-3.69897	-5.30103	-3.09691	-2	9.2	0.244949	0.774833	0.0238722	0.909156	0.0290615
2.30103	-0.69897	1.47712	2.4207	1.04381	0.69897	1.422	-0.69897	0.30103	-2.69897	-2.69897	-2.69897	-0.69897	-0.69897	-2.69897	-0.69897	-0.69897	-2.69897	0.30103	0.30103	-0.69897	-2.69897	-2.69897	-0.69897	-2.69897	-1	-2.69897	2.50923	2.16885	0.30103	-2.82391	-1.30103	-3	-2	-2	-4	-4.30103	-3.69897	-5.30103	-3.09691	-2	9.08333	0.343592	0.770651	0.0234458	0.899656	0.0125457
2.30103	-0.69897	1.47712	2.4207	1.04381	0.69897	1.64762	-0.69897	0.30103	-2.69897	-2.69897	-2.69897	-0.69897	-0.69897	-2.69897	-0.69897	-0.69897	-2.69897	0.30103	0.30103	-0.69897	-2.69897	-2.69897	-0.69897	-2.69897	-1	-2.69897	2.50923	2.16885	1.04139	-2.82391	-1.30103	-3	-2	-2	-4	-4.30103	-3.69897	-5.30103	-3.09691	-2	9.08333	0.343592	0.758234	0.0181776	0.889322	0.0212922
2.30103	-0.69897	1.47712	2.4207	1.04381	0.69897	1.38814	-0.69897	0.30103	-2.69897	-2.69897	-2.69897	-0.69897	-0.69897	-2.69897	-0.69897	-0.69897	-2.69897	0.30103	0.30103	-0.69897	-2.69897	-2.69897	-0.69897	-2.69897	-1	-2.69897	2.50923	2.16885	0.00432137	-3.30103	-1.30103	-3	-2	-2	-4	-4.30103	-3.69897	-5.30103	-3.09691	-2	9.16667	0.372678	0.754835	0.0180252	0.909433	0.0262361
2.30103	-0.69897	1.47712	2.4207	1.04381	0.69897	1.38849	-0.69897	0.30103	-2.69897	-2.69897	-2.69897	-0.69897	-0.69897	-2.69897	-0.69897	-0.69897	-2.69897	0.30103	0.30103	-0.69897	-2.69897	-2.69897	-0.69897	-2.69897	-1	-2.69897	2.50923	2.16885	0.00432137	-1.97881	-1.30103	-3	-2	-2	-4	-4.30103	-3.69897	-5.30103	-3.09691	-2	8.91667	0.343592	0.759133	0	0.922767	0.0160992
2.30103	-0.69897	1.47712	2.4207	1.04381	0.69897	1.39168	-0.69897	0.30103	-2.69897	-2.69897	-2.69897	-0.69897	-0.69897	-2.69897	-0.69897	-0.69897	-2.69897	0.30103	0.30103	-0.69897	-2.69897	-2.69897	-0.69897	-2.69897	-1	-2.69897	2.50923	2.16885	0.00432137	-0.997834	-1.30103	-3	-2	-2	-4	-4.30103	-3.69897	-5.30103	-3.09691	-2	9	0.288675	0.766259	0.0149626	0.934044	0.0142106
2.30103	-0.69897	1.47712	2.4207	1.04381	0.69897	1.4223	-0.69897	0.30103	-2.69897	-2.69897	-2.69897	-0.69897	-0.69897	-2.69897	-0.69897	-0.69897	-2.69897	0.30103	0.30103	-0.69897	-2.69897	-2.69897	-0.69897	-2.69897	-1	-2.69897	2.50923	2.16885	0.00432137	0.000217093	-1.30103	-3	-2	-2	-4	-4.30103	-3.69897	-5.30103	-3.09691	-2	9	0	0.747028	0.0172162	0.963044	0.0364282
2.30103	-0.69897	1.47712	2.4207	1.04379	0.69897	1.38817	-0.69897	0.30103	-2.69897	-2.69897	-2.69897	-0.69897	-0.69897	-2.69897	-0.69897	-0.69897	-2.69897	0.30103	0.30103	-0.69897	-2.69897	-2.69897	-0.69897	-2.69897	-1	-2.69897	2.50923	2.16885	0.00432137	-3	-1.30103	-3	-2	-2	-4	-4.30103	-3.69897	-5.30103	-3.09691	-2	8.83333	0.372678	0.772552	0.0265875	0.924322	0.0110649
2.30103	-0.69897	1.47712	2.4207	1.04399	0.69897	1.38817	-0.69897	0.30103	-2.69897	-2.69897	-2.69897	-0.69897	-0.69897	-2.69897	-0.69897	-0.69897	-2.69897	0.30103	0.30103	-0.69897	-2.69897	-2.69897	-0.69897	-2.69897	-1	-2.69897	2.50923	2.16885	0.00432137	-2.22185	-1.30103	-3	-2	-2	-4	-4.30103	-3.69897	-5.30103	-3.09691	-2	9	0	0.756416	0.0086929	0.948378	0.0101679
2.30103	-0.69897	1.47712	2.4207	1.04575	0.69897	1.38817	-0.69897	0.30103	-2.69897	-2.69897	-2.69897	-0.69897	-0.69897	-2.69897	-0.69897	-0.69897	-2.69897	0.30103	0.30103	-0.69897	-2.69897	-2.69897	-0.69897	-2.69897	-1	-2.69897	2.50923	2.16885	0.00432137	-1.29243	-1.30103	-3	-2	-2	-4	-4.30103	-3.69897	-5.30103	-3.09691	-2	9.16667	0.372678	0.783666	0.00949377	0.952211	0.0131792
2.30103	-0.69897	1.47712	2.4207	1.063	0.69897	1.38817	-0.69897	0.30103	-2.69897	-2.69897	-2.69897	-0.69897	-0.69897	-2.69897	-0.69897	-0.69897	-2.69897	0.30103	0.30103	-0.69897	-2.69897	-2.69897	-0.69897	-2.69897	-1	-2.69897	2.50923	2.16885	0.00432137	-0.300162	-1.30103	-3	-2	-2	-4	-4.30103	-3.69897	-5.30103	-3.09691	-2	8.66667	0.235702	0.771169	0.034647	0.960989	0.022637
2.30103	-4.69897	1.47712	2.4207	1.04381	0.69897	1.38817	-0.69897	0.30103	-2.69897	-2.69897	-2.69897	-0.69897	-0.69897	-2.69897	-0.69897	-0.69897	-2.69897	0.30103	0.30103	-0.69897	-2.69897	-2.69897	-0.69897	-2.69897	-1	-2.69897	2.50923	2.16708	0.00432137	-2.82391	-1.30103	-3	-2	-2	-4	-4.30103	-3.69897	-5.30103	-3.09691	-2	8.83333	0.372678	0.744057	0.00750357	0.942433	0.0157092
2.30103	-2.69897	1.47712	2.4207	1.04381	0.69897	1.38817	-0.69897	0.30103	-2.69897	-2.69897	-2.69897	-0.69897	-0.69897	-2.69897	-0.69897	-0.69897	-2.69897	0.30103	0.30103	-0.69897	-2.69897	-2.69897	-0.69897	-2.69897	-1	-2.69897	2.50923	2.1671	0.00432137	-2.82391	-1.30103	-3	-2	-2	-4	-4.30103	-3.69897	-5.30103	-3.09691	-2	8.91667	0.448764	0.752032	0	0.937544	0.0181554
2.30103	-1.69897	1.47712	2.4207	1.04381	0.69897	1.38817	-0.69897	0.30103	-2.69897	-2.69897	-2.69897	-0.69897	-0.69897	-2.69897	-0.69897	-0.69897	-2.69897	0.30103	0.30103	-0.69897	-2.69897	-2.69897	-0.69897	-2.69897	-1	-2.69897	2.50923	2.16726	0.00432137	-2.82391	-1.30103	-3	-2	-2	-4	-4.30103	-3.69897	-5.30103	-3.09691	-2	8.83333	0.235702	0.762217	0.00187976	0.926489	0.0154385
2.30103	0.30103	1.47712	2.4207	1.04381	0.69897	1.38817	-0.69897	0.30103	-2.69897	-2.69897	-2.69897	-0.69897	-0.69897	-2.69897	-0.69897	-0.69897	-2.69897	0.30103	0.30103	-0.69897	-2.69897	-2.69897	-0.69897	-2.69897	-1	-2.69897	2.50923	2.18446	0.00432137	-2.82391	-1.30103	-3	-2	-2	-4	-4.30103	-3.69897	-5.30103	-3.09691	-2	9.41667	0.533594	0.748026	0.0294966	0.933489	0.0242101
2.30103	-0.69897	1.47712	2.4207	1.04381	-3.30103	1.38817	-0.69897	0.30103	-2.69897	-2.69897	-2.69897	-0.69897	-0.69897	-2.69897	-0.69897	-0.69897	-2.69897	0.30103	0.30103	-0.69897	-2.69897	-2.69897	-0.69897	-2.69897	-1	-2.69897	2.50923	2.13837	0.00432137	-2.82391	-1.30103	-3	-2	-2	-4	-4.30103	-3.69897	-5.30103	-3.09691	-2	8.83333	0.235702	0.73459	0.0125894	0.938211	0.0139492
2.30103	-0.69897	1.47712	2.4207	1.04381	-1.30103	1.38817	-0.69897	0.30103	-2.69897	-2.69897	-2.69897	-0.69897	-0.69897	-2.69897	-0.69897	-0.69897	-2.69897	0.30103	0.30103	-0.69897	-2.69897	-2.69897	-0.69897	-2.69897	-1	-2.69897	2.50923	2.13868	0.00432137	-2.82391	-1.30103	-3	-2	-2	-4	-4.30103	-3.69897	-5.30103	-3.09691	-2	8.5	0.408248	0.740308	0.00544042	0.932489	0.0226923
2.30103	-0.69897	1.47712	2.4207	1.04381	-0.30103	1.38817	-0.69897	0.30103	-2.69897	-2.69897	-2.69897	-0.69897	-0.69897	-2.69897	-0.69897	-0.69897	-2.69897	0.30103	0.30103	-0.69897	-2.69897	-2.69897	-0.69897	-2.69897	-1	-2.69897	2.50923	2.14151	0.00432137	-2.82391	-1.30103	-3	-2	-2	-4	-4.30103	-3.69897	-5.30103	-3.09691	-2	8.66667	0.235702	0.763389	0.00779922	0.935322	0.029347
2.30103	-0.69897	1.47712	2.4207	1.04381	1.69897	1.38817	-0.69897	0.30103	-2.69897	-2.69897	-2.69897	-0.69897	-0.69897	-2.69897	-0.69897	-0.69897	-2.69897	0.30103	0.30103	-0.69897	-2.69897	-2.69897	-0.69897	-2.69897	-1	-2.69897	2.50923	2.3757	0.00432137	-2.82391	-1.30103	-3	-2	-2	-4	-4.30103	-3.69897	-5.30103	-3.09691	-2	9.5	0	0.699264	0.0242485	0.916044	0.0226097
2.30103	-0.69897	1.47712	2.4207	1.04185	0.69897	1.38817	-0.69897	0.30103	-2.69897	-2.69897	-2.69897	-0.69897	-0.69897	-2.69897	-0.69897	-0.69897	-2.69897	0.30103	0.30103	-0.69897	-2.69897	-2.69897	-0.69897	-2.69897	-1	-2.69897	2.50923	2.16885	0.00432137	-2.82391	-6.30103	-3	-2	-2	-4	-4.30103	-3.69897	-5.30103	-3.09691	-2	9.5	0.408248	0.736489	0.0298427
2.30103	-0.69897	1.47712	2.4207	1.04185	0.69897	1.38817	-0.69897	0.30103	-2.69897	-2.69897	-2.69897	-0.69897	-0.69897	-2.69897	-0.69897	-0.69897	-2.69897	0.30103	0.30103	-0.69897	-2.69897	-2.69897	-0.69897	-2.69897	-1	-2.69897	2.50923	2.16885	0.00432137	-2.82391	-4.30103	-3	-2	-2	-4	-4.30103	-3.69897	-5.30103	-3.09691	-2	9.08333	0.533594	0.727986	0.0204596	0.727433	0
2.30103	-0.69897	1.47712	2.4207	1.04187	0.69897	1.38817	-0.69897	0.30103	-2.69897	-2.69897	-2.69897	-0.69897	-0.69897	-2.69897	-0.69897	-0.69897	-2.69897	0.30103	0.30103	-0.69897	-2.69897	-2.69897	-0.69897	-2.69897	-1	-2.69897	2.50923	2.16885	0.00432137	-2.82391	-3.30103	-3	-2	-2	-4	-4.30103	-3.69897	-5.30103	-3.09691	-2	9.33333	0.235702	0.712847	0.012087	0.875656	0.0148032
2.30103	-0.69897	1.47712	2.4207	1.04204	0.69897	1.38817	-0.69897	0.30103	-2.69897	-2.69897	-2.69897	-0.69897	-0.69897	-2.69897	-0.69897	-0.69897	-2.69897	0.30103	0.30103	-0.69897	-2.69897	-2.69897	-0.69897	-2.69897	-1	-2.69897	2.50923	2.16885	0.00432137	-2.82391	-2.30103	-3	-2	-2	-4	-4.30103	-3.69897	-5.30103	-3.09691	-2	9.08333	0.448764	0.737301	0.0198167	0.941433	0.017442
2.30103	-0.69897	1.47712	2.4207	1.04377	0.69897	1.38817	-0.69897	0.30103	-2.69897	-2.69897	-2.69897	-0.69897	-0.69897	-2.69897	-0.69897	-0.69897	-2.69897	0.30103	0.30103	-0.69897	-2.69897	-2.69897	-0.69897	-2.69897	-1	-2.69897	2.50923	2.16885	0.00432137	-2.82391	-1.30103	-8	-2	-2	-4	-4.30103	-3.69897	-5.30103	-3.09691	-2	9.16667	0.235702	0.733884	0.0165474	0.9166	0.00959311
2.30103	-0.69897	1.47712	2.4207	1.04377	0.69897	1.38817	-0.69897	0.30103	-2.69897	-2.69897	-2.69897	-0.69897	-0.69897	-2.69897	-0.69897	-0.69897	-2.69897	0.30103	0.30103	-0.69897	-2.69897	-2.69897	-0.69897	-2.69897	-1	-2.69897	2.50923	2.16885	0.00432137	-2.82391	-1.30103	-6	-2	-2	-4	-4.30103	-3.69897	-5.30103	-3.09691	-2	8.91667	0.448764	0.724464	0.0135954	0.926322	0.00752198
2.30103	-0.69897	1.47712	2.4207	1.04378	0.69897	1.38817	-0.69897	0.30103	-2.69897	-2.69897	-2.69897	-0.69897	-0.69897	-2.69897	-0.69897	-0.69897	-2.69897	0.30103	0.30103	-0.69897	-2.69897	-2.69897	-0.69897	-2.69897	-1	-2.69897	2.50923	2.16885	0.00432137	-2.82391	-1.30103	-5	-2	-2	-4	-4.30103	-3.69897	-5.30103	-3.09691	-2	8.66667	0.235702	0.744658	0.0280625	0.934211	0.00946664
2.30103	-0.69897	1.47712	2.4207	1.04378	0.69897	1.38817	-0.69897	0.30103	-2.69897	-2.69897	-2.69897	-0.69897	-0.69897	-2.69897	-0.69897	-0.69897	-2.69897	0.30103	0.30103	-0.69897	-2.69897	-2.69897	-0.69897	-2.69897	-1	-2.69897	2.50923	2.16885	0.00432137	-2.82391	-1.30103	-4	-2	-2	-4	-4.30103	-3.69897	-5.30103	-3.09691	-2	8.83333	0.372678	0.735396	0.0156629	0.949044	0.0182487
2.30103	-0.69897	1.47712	2.4207	1.04381	0.69897	1.38817	-0.69897	0.30103	-2.69897	-2.69897	-2.69897	-0.69897	-0.69897	-2.69897	-0.69897	-0.69897	-2.69897	0.30103	0.30103	-0.69897	-2.69897	-2.69897	-0.69897	-2.69897	-1	-2.69897	2.50923	2.16879	0.00432137	-2.82391	-1.30103	-3	-2	-6	-4	-4.30103	-3.69897	-5.30103	-3.09691	-2	9.25	0.25	0.759854	0.0126831	0.9201	0.0147723
2.30103	-0.69897	1.47712	2.4207	1.04381	0.69897	1.38817	-0.69897	0.30103	-2.69897	-2.69897	-2.69897	-0.69897	-0.69897	-2.69897	-0.69897	-0.69897	-2.69897	0.30103	0.30103	-0.69897	-2.69897	-2.69897	-0.69897	-2.69897	-1	-2.69897	2.50923	2.16879	0.00432137	-2.82391	-1.30103	-3	-2	-4	-4	-4.30103	-3.69897	-5.30103	-3.09691	-2	9	0.288675	0.743163	0.0261133	0.919322	0.0204067
2.30103	-0.69897	1.47712	2.4207	1.04381	0.69897	1.38817	-0.69897	0.30103	-2.69897	-2.69897	-2.69897	-0.69897	-0.69897	-2.69897	-0.69897	-0.69897	-2.69897	0.30103	0.30103	-0.69897	-2.69897	-2.69897	-0.69897	-2.69897	-1	-2.69897	2.50923	2.1688	0.00432137	-2.82391	-1.30103	-3	-2	-3	-4	-4.30103	-3.69897	-5.30103	-3.09691	-2	9.58333	0.448764	0.756999	0.0251318	0.923267	0.0263557
2.30103	-0.69897	1.47712	2.4207	1.04381	0.69897	1.38817	-0.69897	0.30103	-2.69897	-2.69897	-2.69897	-0.69897	-0.69897	-2.69897	-0.69897	-0.69897	-2.69897	0.30103	0.30103	-0.69897	-2.69897	-2.69897	-0.69897	-2.69897	-1	-2.69897	2.50923	2.16938	0.00432137	-2.82391	-1.30103	-3	-2	-1	-4	-4.30103	-3.69897	-5.30103	-3.09691	-2	9.08333	0.343592	0.739484	0.0199611	0.9491	0.0246877
2.30103	-0.69897	1.47712	2.4207	1.04342	0.69897	1.38817	-0.69897	0.30103	-2.69897	-2.69897	-2.69897	-0.69897	-0.69897	-2.69897	-0.69897	-0.69897	-2.69897	0.30103	0.30103	-0.69897	-2.69897	-2.69897	-0.69897	-2.69897	-1	-2.69897	2.50923	2.16885	0.00432137	-2.82391	-1.30103	-3	-7	-2	-4	-4.30103	-3.69897	-5.30103	-3.09691	-2	9.16667	0.235702	0.753982	0.0181196	0.905822	0.0253197
2.30103	-0.69897	1.47712	2.4207	1.04342	0.69897	1.38817	-0.69897	0.30103	-2.69897	-2.69897	-2.69897	-0.69897	-0.69897	-2.69897	-0.69897	-0.69897	-2.69897	0.30103	0.30103	-0.69897	-2.69897	-2.69897	-0.69897	-2.69897	-1	-2.69897	2.50923	2.16885	0.00432137	-2.82391	-1.30103	-3	-5	-2	-4	-4.30103	-3.69897	-5.30103	-3.09691	-2	9	0	0.749023	0.0174305	0.920989	0.0152603
2.30103	-0.69897	1.47712	2.4207	1.04343	0.69897	1.38817	-0.69897	0.30103	-2.69897	-2.69897	-2.69897	-0.69897	-0.69897	-2.69897	-0.69897	-0.69897	-2.69897	0.30103	0.30103	-0.69897	-2.69897	-2.69897	-0.69897	-2.69897	-1	-2.69897	2.50923	2.16885	0.00432137	-2.82391	-1.30103	-3	-4	-2	-4	-4.30103	-3.69897	-5.30103	-3.09691	-2	8.83333	0.235702	0.771475	0.0241861	0.894711	0.022952
2.30103	-0.69897	1.47712	2.4207	1.04346	0.69897	1.38817	-0.69897	0.30103	-2.69897	-2.69897	-2.69897	-0.69897	-0.69897	-2.69897	-0.69897	-0.69897	-2.69897	0.30103	0.30103	-0.69897	-2.69897	-2.69897	-0.69897	-2.69897	-1	-2.69897	2.50923	2.16885	0.00432137	-2.82391	-1.30103	-3	-3	-2	-4	-4.30103	-3.69897	-5.30103	-3.09691	-2	9	0	0.756914	0.0147712	0.922933	0.0164978
2.30103	-0.69897	1.47712	2.4207	1.04381	0.69897	1.38817	-0.69897	0.30103	-2.69897	-2.69897	-2.69897	-0.69897	-0.69897	-2.69897	-0.69897	-0.69897	-2.69897	0.30103	0.30103	-0.69897	-2.69897	-2.69897	-0.69897	-2.69897	-1	-2.69897	2.50923	2.16885	0.00432137	-2.82391	-1.30103	-3	-2	-2	-6	-4.30103	-3.69897	-5.30103	-3.09691	-2	9	0.408248	0.749145	0.00517284	0.948378	0.0181989
2.30103	-0.69897	1.47712	2.4207	1.04381	0.69897	1.38819	-0.69897	0.30103	-2.69897	-2.69897	-2.69897	-0.69897	-0.69897	-2.69897	-0.69897	-0.69897	-2.69897	0.30103	0.30103	-0.69897	-2.69897	-2.69897	-0.69897	-2.69897	-1	-2.69897	2.50923	2.16885	0.00432137	-2.82391	-1.30103	-3	-2	-2	-3	-4.30103	-3.69897	-5.30103	-3.09691	-2	9.16667	0.372678	0.750495	0.0225661	1.0041	0.00701057
2.30103	-0.69897	1.47712	2.4207	1.04381	0.69897	1.38835	-0.69897	0.30103	-2.69897	-2.69897	-2.69897	-0.69897	-0.69897	-2.69897	-0.69897	-0.69897	-2.69897	0.30103	0.30103	-0.69897	-2.69897	-2.69897	-0.69897	-2.69897	-1	-2.69897	2.50923	2.16885	0.00432137	-2.82391	-1.30103	-3	-2	-2	-2	-4.30103	-3.69897	-5.30103	-3.09691	-2	9.25	0.381881	0.730566	0.0209308	1.02532	0.0214396
2.30103	-0.69897	1.47712	2.4207	1.04381	0.69897	1.38995	-0.69897	0.30103	-2.69897	-2.69897	-2.69897	-0.69897	-0.69897	-2.69897	-0.69897	-0.69897	-2.69897	0.30103	0.30103	-0.69897	-2.69897	-2.69897	-0.69897	-2.69897	-1	-2.69897	2.50923	2.16885	0.00432137	-2.82391	-1.30103	-3	-2	-2	-1	-4.30103	-3.69897	-5.30103	-3.09691	-2	9.25	0.25	0.71233	0.0202155	1.05777	0.0225315
2.30103	-0.69897	1.47712	2.4207	1.04381	0.69897	1.38817	-0.69897	0.30103	-2.69897	-2.69897	-2.69897	-0.69897	-0.69897	-2.69897	-0.69897	-0.69897	-2.69897	0.30103	0.30103	-0.69897	-2.69897	-2.69897	-0.69897	-2.69897	-1	-2.69897	2.50923	2.16885	0.00432137	-2.82391	-1.30103	-3	-2	-2	-4	-4.30103	-5.69897	-5.30103	-3.09691	-2	9.5	0	0.753781	0.0263819	0.918989	0.0172451
2.30103	-0.69897	1.47712	2.4207	1.04381	0.69897	1.38817	-0.69897	0.30103	-2.69897	-2.69897	-2.69897	-0.69897	-0.69897	-2.69897	-0.69897	-0.69897	-2.69897	0.30103	0.30103	-0.69897	-2.69897	-2.69897	-0.69897	-2.69897	-1	-2.69897	2.50923	2.16885	0.00432137	-2.82391	-1.30103	-3	-2	-2	-4	-4.30103	-2.69897	-5.30103	-3.09691	-2	9	0	0.758008	0.016058	0.9416	0.00996986
2.30103	-0.69897	1.47712	2.4207	1.04381	0.69897	1.38817	-0.69897	0.30103	-2.69897	-2.69897	-2.69897	-0.69897	-0.69897	-2.69897	-0.69897	-0.69897	-2.69897	0.30103	0.30103	-0.69897	-2.69897	-2.69897	-0.69897	-2.69897	-1	-2.69897	2.50923	2.16885	0.00432137	-2.82391	-1.30103	-3	-2	-2	-4	-4.30103	-1.69897	-5.30103	-3.09691	-2	9	0.5	0.7607	0.0149981	0.952711	0.00877795
2.30103	-0.69897	1.47712	2.4207	1.04381	0.69897	1.38817	-0.69897	0.30103	-2.69897	-2.69897	-2.69897	-0.69897	-0.69897	-2.69897	-0.69897	-0.69897	-2.69897	0.30103	0.30103	-0.69897	-2.69897	-2.69897	-0.69897	-2.69897	-1	-2.69897	2.50923	2.16885	0.00432137	-2.82391	-1.30103	-3	-2	-2	-4	-4.30103	-0.69897	-5.30103	-3.09691	-2	9.33333	0.372678	0.73561	0.0253543	0.962989	0.0110565
2.30103	-0.69897	1.47712	2.4207	1.04381	0.69897	1.38817	-0.69897	0.30103	-2.69897	-2.69897	-2.69897	-0.69897	-0.69897	-2.69897	-0.69897	-0.69897	-2.69897	0.30103	0.30103	-0.69897	-2.69897	-2.69897	-0.69897	-2.69897	-1	-2.69897	2.50923	2.16885	0.00432137	-2.82391	-1.30103	-3	-2	-2	-4	-4.30103	-3.69897	-7.30103	-3.09691	-2	8.91667	0.343592	0.730039	0.00626692	0.924822	0.0137105
2.30103	-0.69897	1.47712	2.4207	1.04381	0.69897	1.38817	-0.69897	0.30103	-2.69897	-2.69897	-2.69897	-0.69897	-0.69897	-2.69897	-0.69897	-0.69897	-2.69897	0.30103	0.30103	-0.69897	-2.69897	-2.69897	-0.69897	-2.69897	-1	-2.69897	2.50923	2.16885	0.00432137	-2.82391	-1.30103	-3	-2	-2	-4	-4.30103	-3.69897	-4.30103	-3.09691	-2	9.08333	0.343592	0.732486	0.015442	0.925267	0.0234274
2.30103	-0.69897	1.47712	2.4207	1.04381	0.69897	1.38817	-0.69897	0.30103	-2.69897	-2.69897	-2.69897	-0.69897	-0.69897	-2.69897	-0.69897	-0.69897	-2.69897	0.30103	0.30103	-0.69897	-2.69897	-2.69897	-0.69897	-2.69897	-1	-2.69897	2.50923	2.16885	0.00432137	-2.82391	-1.30103	-3	-2	-2	-4	-4.30103	-3.69897	-3.30103	-3.09691	-2	8.5	0.288675	0.75012	0.0133209	0.944044	0.0182781
2.30103	-0.69897	1.47712	2.4207	1.04381	0.69897	1.38817	-0.69897	0.30103	-2.69897	-2.69897	-2.69897	-0.69897	-0.69897	-2.69897	-0.69897	-0.69897	-2.69897	0.30103	0.30103	-0.69897	-2.69897	-2.69897	-0.69897	-2.69897	-1	-2.69897	2.50923	2.16885	0.00432137	-2.82391	-1.30103	-3	-2	-2	-4	-4.30103	-3.69897	-2.30103	-3.09691	-2	8.5	0	0.728594	0.0155069	0.9596	0.0220065
2.30103	-0.69897	1.47712	2.4207	1.04381	0.69897	1.38817	-0.69897	0.30103	-2.69897	-2.69897	-2.69897	-0.69897	-0.69897	-2.69897	-0.69897	-0.69897	-2.69897	0.30103	0.30103	-0.69897	-2.69897	-2.69897	-0.69897	-2.69897	-1	-2.69897	2.50923	2.16885	0.00432137	-2.82391	-1.30103	-3	-2	-2	-4	-6.30103	-3.69897	-5.30103	-3.09691	-2	8.91667	0.343592	0.748484	0.0194258	0.928489	0.0199252
2.30103	-0.69897	1.47712	2.4207	1.04381	0.69897	1.38817	-0.69897	0.30103	-2.69897	-2.69897	-2.69897	-0.69897	-0.69897	-2.69897	-0.69897	-0.69897	-2.69897	0.30103	0.30103	-0.69897	-2.69897	-2.69897	-0.69897	-2.69897	-1	-2.69897	2.50923	2.16885	0.00432137	-2.82391	-1.30103	-3	-2	-2	-4	-3.30103	-3.69897	-5.30103	-3.09691	-2	8.3	0.244949	0.73721	0.00739729	0.939322	0.0251497
2.30103	-0.69897	1.47712	2.4207	1.04381	0.69897	1.38817	-0.69897	0.30103	-2.69897	-2.69897	-2.69897	-0.69897	-0.69897	-2.69897	-0.69897	-0.69897	-2.69897	0.30103	0.30103	-0.69897	-2.69897	-2.69897	-0.69897	-2.69897	-1	-2.69897	2.50923	2.16885	0.00432137	-2.82391	-1.30103	-3	-2	-2	-4	-2.30103	-3.69897	-5.30103	-3.09691	-2	8.66667	0.235702	0.738433	0.0131911	0.950544	0.0193244
2.30103	-0.69897	1.47712	2.4207	1.04381	0.69897	1.38817	-0.69897	0.30103	-2.69897	-2.69897	-2.69897	-0.69897	-0.69897	-2.69897	-0.69897	-0.69897	-2.69897	0.30103	0.30103	-0.69897	-2.69897	-2.69897	-0.69897	-2.69897	-1	-2.69897	2.50923	2.16885	0.00432137	-2.82391	-1.30103	-3	-2	-2	-4	-1.30103	-3.69897	-5.30103	-3.09691	-2	9.08333	0.343592	0.716272	0.000525456	0.959822	0.0246707
2.30103	-0.69897	1.47712	2.4207	1.04381	0.69897	1.38817	-0.69897	0.30103	-2.69897	-2.69897	-2.69897	-0.69897	-0.69897	-2.69897	-0.69897	-0.69897	-2.69897	0.30103	0.30103	-0.69897	-2.69897	-2.69897	-0.69897	-2.69897	-1	-2.69897	2.50923	2.16885	0.00432137	-2.82391	-1.30103	-3	-2	-2	-4	-4.30103	-3.69897	-5.30103	-5.09691	-2	8.5	0	0.760842	0.02236	0.915211	0.0240914
2.30103	-0.69897	1.47712	2.4207	1.04381	0.69897	1.38817	-0.69897	0.30103	-2.69897	-2.69897	-2.69897	-0.69897	-0.69897	-2.69897	-0.69897	-0.69897	-2.69897	0.30103	0.30103	-0.69897	-2.69897	-2.69897	-0.69897	-2.69897	-1	-2.69897	2.50923	2.16885	0.00432137	-2.82391	-1.30103	-3	-2	-2	-4	-4.30103	-3.69897	-5.30103	-2.09691	-2	8.33333	0.372678	0.758888	0.0147006	0.931378	0.0118375
2.30103	-0.69897	1.47712	2.4207	1.04381	0.69897	1.38817	-0.69897	0.30103	-2.69897	-2.69897	-2.69897	-0.69897	-0.69897	-2.69897	-0.69897	-0.69897	-2.69897	0.30103	0.30103	-0.69897	-2.69897	-2.69897	-0.69897	-2.69897	-1	-2.69897	2.50923	2.16885	0.00432137	-2.82391	-1.30103	-3	-2	-2	-4	-4.30103	-3.69897	-5.30103	-1.09691	-2	8.66667	0.235702	0.747835	0.0139072	0.948267	0.0156616
2.30103	-0.69897	1.47712	2.4207	1.04381	0.69897	1.38817	-0.69897	0.30103	-2.69897	-2.69897	-2.69897	-0.69897	-0.69897	-2.69897	-0.69897	-0.69897	-2.69897	0.30103	0.30103	-0.69897	-2.69897	-2.69897	-0.69897	-2.69897	-1	-2.69897	2.50923	2.16885	0.00432137	-2.82391	-1.30103	-3	-2	-2	-4	-4.30103	-3.69897	-5.30103	-0.09691	-2	8.66667	0.235702	0.716117	0.0122122	0.923211	0.0261404
2.30103	-0.69897	1.47712	2.4207	1.04381	0.69897	1.38817	-0.69897	0.30103	-2.69897	-2.69897	-2.69897	-0.69897	-0.69897	-2.69897	-0.69897	-0.69897	-2.69897	0.30103	0.30103	-0.69897	-2.69897	-2.69897	-0.69897	-2.69897	-1	-2.69897	2.50923	2.16885	0.00432137	-2.82391	-1.30103	-3	-2	-2	-4	-4.30103	-3.69897	-5.30103	-3.09691	-6	8.75	0.25	0.745966	0.00831091	0.906433	0.0160058
2.30103	-0.69897	1.47712	2.4207	1.04381	0.69897	1.38817	-0.69897	0.30103	-2.69897	-2.69897	-2.69897	-0.69897	-0.69897	-2.69897	-0.69897	-0.69897	-2.69897	0.30103	0.30103	-0.69897	-2.69897	-2.69897	-0.69897	-2.69897	-1	-2.69897	2.50923	2.16885	0.00432137	-2.82391	-1.30103	-3	-2	-2	-4	-4.30103	-3.69897	-5.30103	-3.09691	-4	8.75	0.25	0.731755	0.0015378	0.918822	0.0258582
2.30103	-0.69897	1.47712	2.4207	1.04381	0.69897	1.38817	-0.69897	0.30103	-2.69897	-2.69897	-2.69897	-0.69897	-0.69897	-2.69897	-0.69897	-0.69897	-2.69897	0.30103	0.30103	-0.69897	-2.69897	-2.69897	-0.69897	-2.69897	-1	-2.69897	2.50923	2.16885	0.00432137	-2.82391	-1.30103	-3	-2	-2	-4	-4.30103	-3.69897	-5.30103	-3.09691	-3	8.75	0.25	0.733168	0.0145152	0.935378	0.016094
2.30103	-0.69897	1.47712	2.4207	1.04381	0.69897	1.38817	-0.69897	0.30103	-2.69897	-2.69897	-2.69897	-0.69897	-0.69897	-2.69897	-0.69897	-0.69897	-2.69897	0.30103	0.30103	-0.69897	-2.69897	-2.69897	-0.69897	-2.69897	-1	-2.69897	2.50923	2.16885	0.00432137	-2.82391	-1.30103	-3	-2	-2	-4	-4.30103	-3.69897	-5.30103	-3.09691	-1	9	0.57735	0.72805	0.0175877	0.972656	0.0166596
