# Supplementary material for: Machine learning-assisted discovery of growth decision elements by relating bacterial population dynamics to environmental diversity
Source: eLife. 2022 Aug 26;11:e76846. doi: 10.7554/eLife.76846 (PMC9417415; doi:10.7554/eLife.76846)
Supplement: Figure 4—source data 1. [file elife-76846-fig4-data1.xlsx]

## Sheet: Table S3
Summary of the feature importance of the components for τ, r, and K. Both the individual and the mean values of five repeated predictions by GBDT are shown.
Components	τ_1	τ_2	τ_3	τ_4	τ_5	τ_mean	Components	r_1	r_2	r_3	r_4	r_5	r_mean	Components	K_1	K_2	K_3	K_4	K_5	K_mean
Ser	60.7745	59.724	55.2964	32.463	52.7252	52.1966	Sulfate	69.6162	67.6031	70.6917	65.4511	71.275	68.9275	Glucose	79.8182	84.7176	82.1456	83.5275	81.442	82.3302
Leu	5.95839	1.32338	19.0909	43.2393	18.8811	17.6986	Ile	6.47491	8.52121	5.70217	6.47791	6.65006	6.76525	Leu	4.69693	5.38232	4.84159	5.23717	5.39424	5.11045
Glu	8.90468	16.0463	1.46973	4.02915	7.83123	7.65623	K	7.13292	7.40015	1.61361	2.86956	3.62743	4.52874	Gln	6.63131	0.0357676	6.62825	3.61653	4.98224	4.37882
Val	7.49208	6.93961	8.56604	1.99218	4.40514	5.87901	Cl	1.18122	3.12573	4.16957	4.83178	4.55095	3.57185	Phosphate	1.46515	2.72632	0.983661	1.76154	0.982196	1.58377
Ile	2.04981	2.57796	3.29812	2.80069	2.98039	2.7414	Phosphate	1.35005	0.633169	2.35594	5.66049	2.8828	2.57649	Mg	1.8186	1.75696	1.13628	0.662233	1.85573	1.44596
Na	2.43419	2.01389	2.38525	0.770028	1.7623	1.87313	Na	2.07145	3.20466	3.27078	2.66131	1.61319	2.56428	Val	1.04809	1.03329	0.938622	0.161738	1.00662	0.837672
K	1.71326	1.82775	1.52588	1.25525	2.01625	1.66768	Ser	2.33453	2.52515	2.86108	3.031	1.77994	2.50634	K	0.846484	0.942446	0.388557	0.89208	0.875788	0.789071
Sulfate	0.413813	0.29041	0.665304	2.05927	2.52763	1.19129	Mg	1.12557	1.10068	1.52189	1.79403	0.758018	1.26004	Cl	0.199113	0.0255347	0.730283	0.0453044	2.10674	0.621395
Phosphate	0.760529	0.114042	1.70846	3.0341	0.104451	1.14432	Val	0.750273	0.891452	1.25273	0.930354	1.23818	1.0126	Na	0.646789	0.955992	0.544632	0.767307	0.0210615	0.587156
VB2	1.05329	0.422643	0.36826	3.25055	0.503147	1.11958	Citrate	1.83574	0.610067	0.710332	0.298801	0.0860657	0.708202	Glu	0.365939	0.962552	0.152805	0.371709	0.32078	0.434757
Asp	2.13278	0.101024	0.527475	0.770596	0.874447	0.881265	Asp	0.608735	0.674597	0.653766	0.582538	0.710006	0.645928	Citrate	0.425658	0.305516	0.737694	0.377576	0.0131814	0.371925
Cl	1.31654	0.528955	0.696245	0.716224	0.559353	0.763462	Glucose	0.707296	0.531447	0.836858	0.539291	0.369535	0.596885	Lys	0.534623	0.186905	0.0975009	0.989511	0.00185842	0.36208
Mg	1.8066	0.56278	0.374397	0.339125	0.558016	0.728182	Ammonium	0.518919	0.390137	0.508283	0.512323	0.737967	0.533526	Ile	0.176501	0.146836	0.23379	0.210877	0.274443	0.208489
Citrate	0.147263	1.30553	0.968173	0.0959115	1.07295	0.717966	Glu	0.670011	0.276151	0.765267	0.432977	0.186344	0.46615	Ca	0.274551	0.120601	0.0335993	0.351392	0.261646	0.208358
VB9	0.0246925	2.89381	0.122895	0.0114246	0.157253	0.642015	Cys	0.372225	0.459269	0.440991	0.499145	0.3995	0.434226	Sulfate	0.123159	0.147354	0.0152049	0.535286	0.0251945	0.16924
Cys	0.406821	0.457054	0.549435	0.589847	0.419573	0.484546	Ca	0.175296	0.416216	0.17172	0.568546	0.791991	0.424754	PABA	0.525349	0.0206906	0.00699451	0.0030166	0.0030622	0.111823
Ca	0.55582	0.274642	0.351729	0.344683	0.375279	0.38043	Met	0.384342	0.201532	0.392212	0.507402	0.382636	0.373625	Pro	0.111511	0.119699	0.136418	0.0627553	0.0712994	0.100337
Asn	0.304499	0.331256	0.390896	0.318286	0.270056	0.322998	Thiosulfate	0.279235	0.0347503	0.0809688	0.182957	0.667822	0.249147	Ammonium	0.0606288	0.0347481	0.00834017	0.0404005	0.0845656	0.0457366
Glucose	0.364416	0.324978	0.339573	0.266867	0.129109	0.284989	Borate	0.145748	0.437313	0.198947	0.0331975	0.19892	0.202825	Fe	0.0234635	0.0570767	0.00542535	0.0540217	0.0314434	0.0342861
Met	0.198452	0.188535	0.178419	0.241052	0.17826	0.196944	Pro	0.222737	0.0996078	0.153229	0.361516	0.164418	0.200302	Arg	0.0221643	0.0308307	0.0278001	0.0255772	0.0434011	0.0299547
Tyr	0.0368142	0.242001	0.120431	0.124352	0.241023	0.152924	Leu	0.336392	0.0250753	0.162915	0.22179	0.127168	0.174668	His	0.00617013	0.0433492	0.00168337	0.0656606	0.00160684	0.023694
Trp	0.021109	0.00916061	0.120462	0.0132188	0.59566	0.151922	Thr	0.133535	0.0840921	0.199473	0.151266	0.0182794	0.117329	VB1	0.0108338	0.0670747	0.00354431	0.0161527	0.0147421	0.0224695
Pro	0.0360541	0.478815	0.0655032	0.087805	0.0576671	0.145169	His	0.127966	0.0338169	0.0880826	0.228542	0.0483337	0.105348	Asp	0.0149994	0.0258019	0.00904484	0.0171665	0.0319249	0.0197875
Thr	0.303233	0.0592491	0.0112219	0.257888	0.0857728	0.143473	PABA	0.113683	0.0528097	0.0948627	0.153486	0.101601	0.103288	Cys	0.0116399	0.012789	0.031244	0.0249766	0.0112438	0.0183786
Ammonium	0.0589201	0.12025	0.211145	0.147921	0.152805	0.138208	Cu	0.320445	0.0418142	0.0855825	0.0352521	0.0118093	0.0989806	Ser	0.0152612	0.0122878	0.0248161	0.0136394	0.024013	0.0180035
Thiosulfate	0.0575118	0.213169	0.0491375	0.0913732	0.0741605	0.0970705	Asn	0.0374659	0.113272	0.0288425	0.188449	0.070889	0.0877836	VB9	0.0112374	0.00546375	0.00508392	0.0500227	0.0180334	0.0179682
His	0.0501906	0.183484	0.0178118	0.117628	0.0116761	0.0761581	Fe	0.0967561	0.0343589	0.0888064	0.0704451	0.0983224	0.0777378	Ala	0.0114613	0.0227404	0.018937	0.0120365	0.00888376	0.0148118
Gln	0.0330995	0.0668134	0.0848384	0.0988714	0.0581956	0.0683637	Arg	0.103109	0.0329021	0.155067	0.0486501	0.0433356	0.0766128	Met	0.012769	0.0165917	0.014439	0.0102672	0.0158477	0.0139829
Ala	0.0969993	0.0399966	0.022124	0.0571717	0.0769571	0.0586497	Ala	0.131635	0.00559237	0.0950373	0.073425	0.074862	0.0761104	Thr	0.0187723	0.00224093	0.0151144	0.0246717	0.0090792	0.0139757
Zn	0.0220055	0.0798461	0.0635379	0.073009	0.0499296	0.0576656	Gln	0.124171	0.0538647	0.036854	0.0400242	0.0630202	0.0635868	Trp	0.0189403	0.00916922	0.0109929	0.0109714	0.0110849	0.0122318
Phe	0.0499888	0.0599251	0.0537681	0.0488428	0.0690665	0.0563183	Lys	0.073354	0.0879258	0.0884168	0.0160349	0.0271548	0.0585773	Thiosulfate	0.000767946	0.0127106	0.0148487	0.0232306	0.00507374	0.0113263
VB1	0.0919716	0.011373	0.0528334	0.0693131	0.000126911	0.0451236	Zn	0.00803874	0.00945234	0.126294	0.0525745	0.0705876	0.0533894	Tyr	0.00742941	0.00914096	0.0111063	0.00997894	0.0147648	0.0104841
Lys	0.0321718	0.049399	0.0365299	0.0220154	0.0642598	0.0408752	Gly	0.0865961	0.0167007	0.116952	0.0250095	0.0135787	0.0517674	Asp	0.00547822	0.0198112	0.00734038	0.00284204	0.00298576	0.00769153
Fe	0.046647	0.047152	0.0430338	0.05894	0.00660847	0.0404762	VB1	0.0305053	0.0332513	0.0264853	0.133225	0.0070346	0.0461003	VB2	0.00519715	0.00973385	0.00572205	0.00337641	0.00697894	0.00620168
Cu	0.0485534	0.022532	0.0738566	0.0352033	0.00591896	0.0372129	Tyr	0.0141154	0.106535	0.0308122	0.0438858	0.0311299	0.0452956	Cu	0.012448	0.00347729	0.00277274	0.00435781	0.00343944	0.00529906
PABA	0.060669	0.0134819	0.0328235	0.0114467	0.0492401	0.0335322	VB2	0.0403582	0.0608108	0.0414602	0.0543707	0.0162274	0.0426455	Gly	0.0119463	0.00359989	0.00262918	0.00219958	0.00518016	0.00511103
Arg	0.035619	0.00234005	0.00439362	0.0650246	0.00550763	0.022577	VB6	0.0789891	0.000745165	0.0742355	0.0306832	0.0236751	0.0416656	Zn	0.00121925	0.00477543	0.00500659	0.00638253	0.00260731	0.00399822
Borate	0.0574985	0.0100842	0.00940393	0.00226572	0.0227809	0.0204067	Phe	0.0713818	0.0225408	0.0436782	0.060032	0.00973814	0.0414742	Molybdate	0.00231198	0.00289486	0.011927	0.00099882	0.0015611	0.00393875
Molybdate	0.0157681	0.0152491	0.0324483	0.0198985	0.010707	0.0188142	Trp	0.063014	0.0122801	0.0260694	0.0612402	0.0273414	0.037989	VB6	0.00253204	0.00194622	0.00527401	0.00179842	0.00738942	0.00378802
Gly	0.0257249	0.0148705	0.0115086	0.00847183	0.0278985	0.0176949	VB9	0.0204176	0.00708409	0.0346314	0.0764416	0.0271017	0.0331353	Phe	0.00225463	0.00305605	0.00374272	0.00303941	0.00347524	0.00311361
VB6	0.0070583	0.0121741	0.00964012	0.00180485	0.00286811	0.00670909	Molybdate	0.0306243	0.028652	0.00336516	0.00893346	0.0179886	0.0179127	Borate	0.00210925	0.00235955	0.00168816	0.0027013	0.00263433	0.00229852
