# Supplementary material for: Machine learning-assisted discovery of growth decision elements by relating bacterial population dynamics to environmental diversity
Source: eLife. 2022 Aug 26;11:e76846. doi: 10.7554/eLife.76846 (PMC9417415; doi:10.7554/eLife.76846)
Supplement: Figure 5—source data 1. [file elife-76846-fig5-data1.xlsx]

## Sheet: Table S4
Summary of sensitivity. The values of Sτ, Sr, SK, Sg and Vs as well as the Vs values estimated by four different criteria (Crit1~Crit4) are shown.
Components	Sr	SK	Sτ	ST	VS	VS_Crit1	VS_Crit2	VS_Crit3	VS_Crit4
Ile	0.313754	0.312651	0.318197	0.944601	0.00310805	2.96861	0.0209284	0.00293587	59.4766
K	0.22596	0.241973	0.260568	0.728501	0.0237749	2.79582	0.136121	0.01732	56.4244
Zn	0.0419174	0.0336582	0.0359385	0.111514	0.0382499	2.66033	0.226448	0.00426541	53.851
Asn	0.0462382	0.0375698	0.0363563	0.120164	0.0448494	2.59881	0.267461	0.00538929	52.631
Asp	0.124201	0.131713	0.161379	0.417292	0.0471099	2.58579	0.27614	0.0196586	52.3571
Gly	0.0843804	0.0619593	0.0671853	0.213525	0.0549394	2.5305	0.312997	0.0117309	51.1974
Sulfate	0.145133	0.190575	0.142854	0.478563	0.056248	2.51115	0.325903	0.0269182	50.8076
Cl	0.0578459	0.0550225	0.0775721	0.19044	0.0645101	2.45501	0.363325	0.0122853	49.5849
Thr	0.0833398	0.0579371	0.0612443	0.202521	0.0681949	2.43007	0.379956	0.0138109	49.031
Phosphate	0.192648	0.288523	0.227893	0.709065	0.0683918	2.45757	0.361622	0.0484942	49.5598
Fe	0.0740231	0.0510211	0.0514357	0.17648	0.0745816	2.38412	0.410587	0.0131622	48.0034
Na	0.133908	0.19854	0.213901	0.546349	0.0776984	2.55421	0.450755	0.0424505	51.2043
Tyr	0.0271762	0.0446185	0.0385148	0.11031	0.0802389	2.47228	0.43003	0.00885112	49.5882
Borate	0.0308198	0.0186365	0.0232031	0.0726593	0.0847098	2.35756	0.428296	0.00615495	47.2516
VB9	0.0329493	0.0292047	0.0194565	0.0816105	0.0853495	2.47685	0.470236	0.00696542	49.5529
PABA	0.0501466	0.0481669	0.0295963	0.12791	0.0886291	2.55072	0.520087	0.0113365	50.8711
Molybdate	0.0358361	0.0221048	0.0238534	0.0817944	0.0913791	2.28246	0.478362	0.00747429	45.5976
Mg	0.126902	0.14755	0.0826901	0.357142	0.0927801	2.42048	0.492814	0.0331357	48.275
Glu	0.137387	0.112056	0.19669	0.446132	0.097367	2.2682	0.487865	0.0434385	45.155
Leu	0.114029	0.212647	0.185558	0.512234	0.0994676	2.40885	0.533427	0.0509507	47.8639
Arg	0.0458363	0.063975	0.0338768	0.143688	0.105468	2.246	0.502664	0.0151545	44.4823
Cu	0.0412004	0.0232159	0.0256806	0.0900969	0.108217	2.1868	0.542135	0.00975004	43.2125
VB6	0.0341127	0.0185775	0.0212005	0.0738906	0.112546	2.16608	0.555949	0.0083161	42.6636
Phe	0.0504648	0.0240532	0.0395149	0.114033	0.116369	2.25965	0.553168	0.0132699	44.4162
Met	0.113445	0.0675448	0.159495	0.340485	0.135028	2.13477	0.576819	0.0459749	41.2758
VB1	0.0169953	0.0423811	0.0312053	0.0905818	0.14046	2.13731	0.622853	0.0127231	41.1231
Glucose	0.14893	0.341669	0.173272	0.663871	0.158102	1.94302	0.704652	0.104959	36.5284
Thiosulfate	0.0619654	0.0456583	0.113272	0.220896	0.159733	1.95014	0.699909	0.0352842	36.6056
Ca	0.0695894	0.0223198	0.0533885	0.145298	0.165325	2.08793	0.750481	0.0240213	39.1125
Trp	0.0502724	0.0873139	0.0321847	0.169771	0.165531	1.94438	0.70375	0.0281024	36.2502
Ammonium	0.0763695	0.0469815	0.135267	0.258618	0.173836	1.91191	0.725395	0.0449572	35.2467
Gln	0.0909225	0.173232	0.051988	0.316143	0.195803	1.82497	0.783356	0.0619016	32.5359
His	0.0739494	0.0228266	0.037516	0.134292	0.195997	1.816	0.789335	0.0263208	32.3521
Citrate	0.126256	0.0270998	0.110783	0.264139	0.201959	2.09209	0.965441	0.0533452	37.371
Ser	0.0663498	0.0403269	0.14051	0.247186	0.210299	1.75921	0.827191	0.0519831	30.5691
Val	0.10566	0.111473	0.307041	0.524174	0.218679	1.70718	0.86188	0.114626	29.1679
Ala	0.0688188	0.119417	0.025435	0.213671	0.220138	1.78928	0.807145	0.0470372	30.6429
Lys	0.0521855	0.0429921	0.138731	0.233909	0.225821	1.68606	0.875962	0.0528215	28.4151
Pro	0.0722318	0.238196	0.0513365	0.361764	0.283018	1.51877	0.987488	0.102386	22.4102
VB2	0.0549777	0.0308659	0.182508	0.268351	0.303657	1.47036	1.01976	0.0814867	20.4655
Cys	0.0640764	0.073722	0.300098	0.437896	0.305026	1.45918	1.02721	0.13357	20.214
